# Supplementary material for: A coalescent sampler successfully detects biologically meaningful population structure overlooked by F‐statistics
Source: PubMed Central journal article supplement (PMC6346657; doi:10.1111/eva.12712), 2018-10-15

# Abudefduf abdominalis

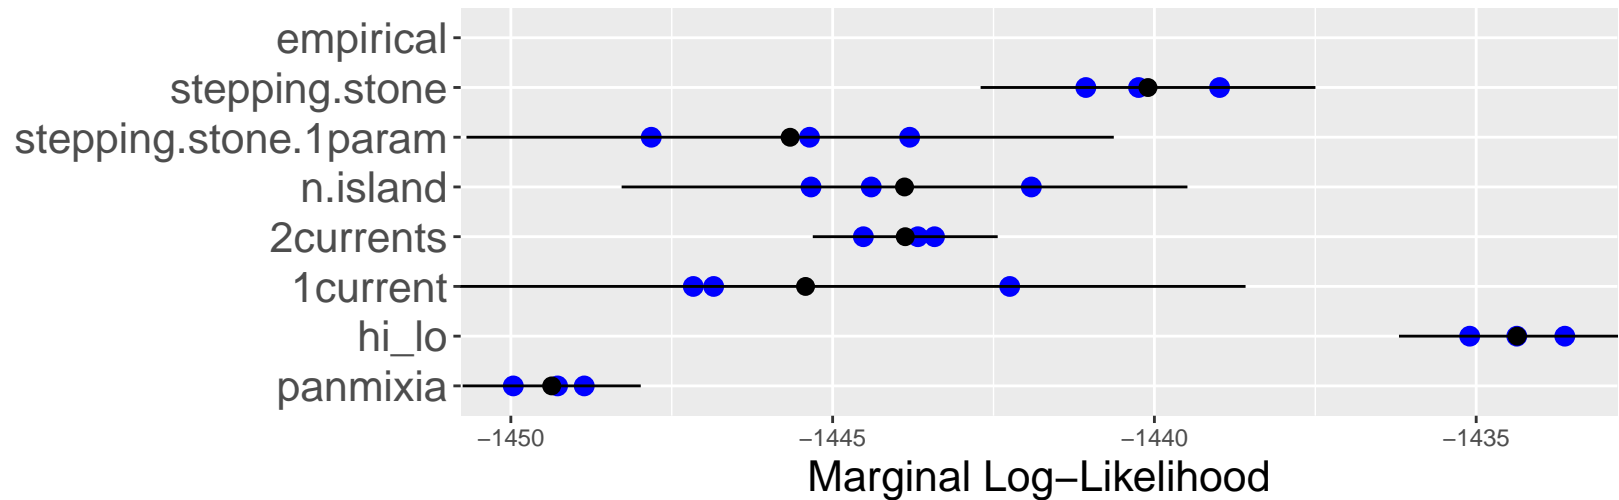

# Abudefduf vaigiensis

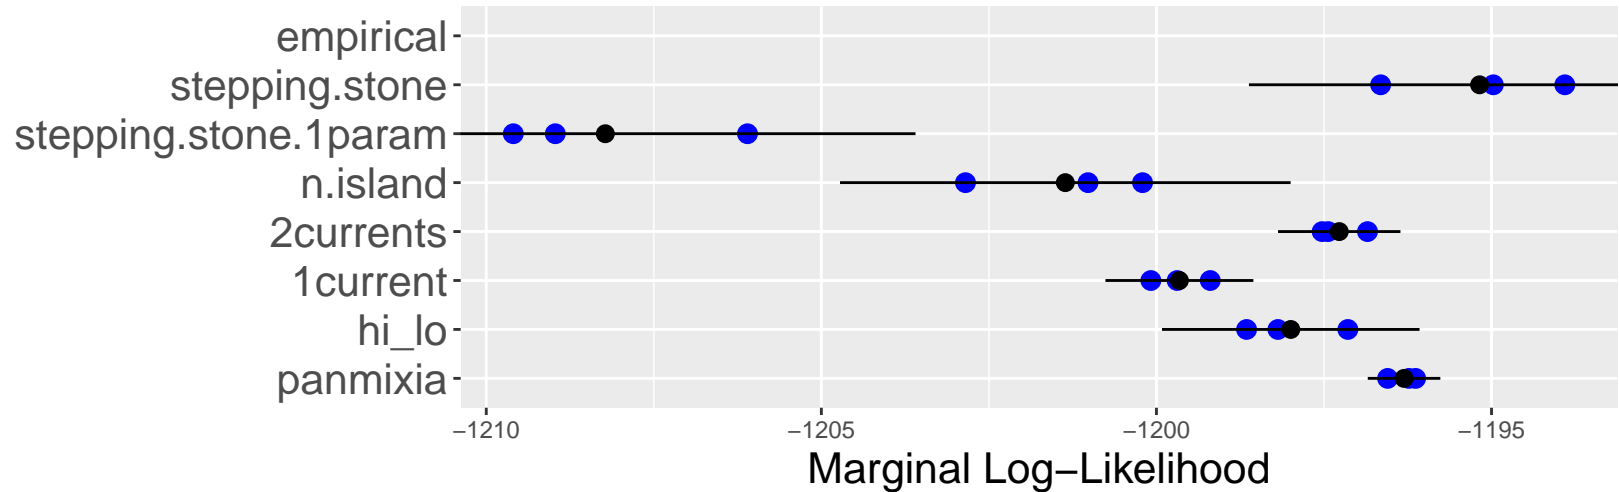

# Acanthurus nigrofuscus

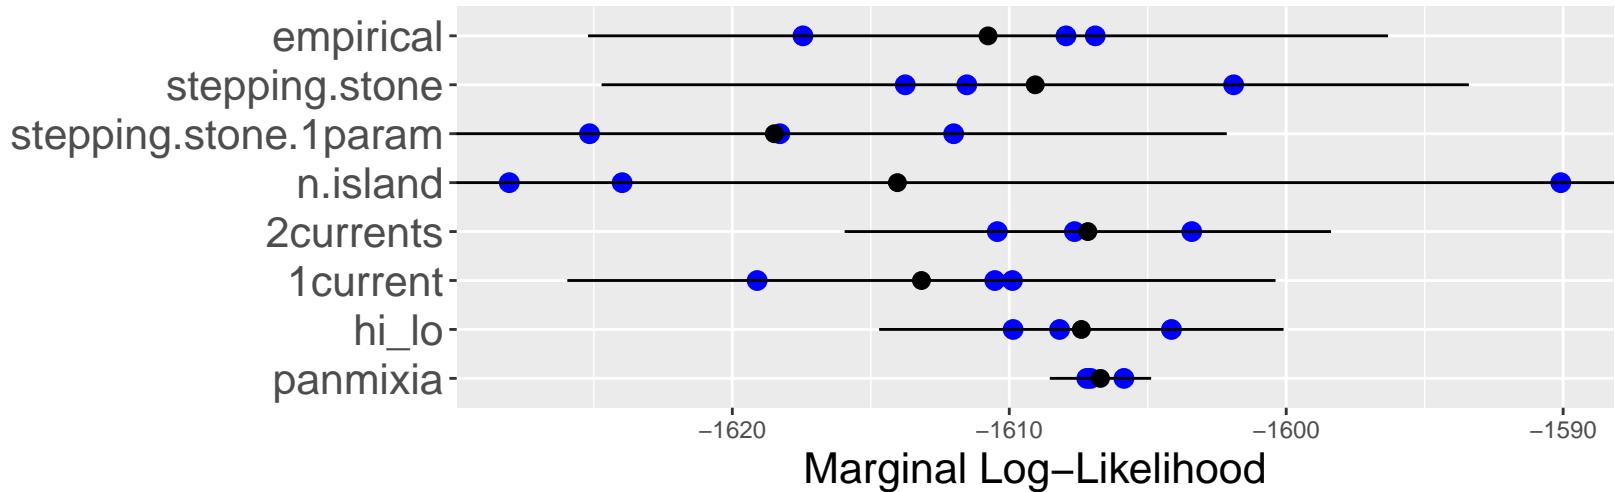

# Acanthurus nigroris

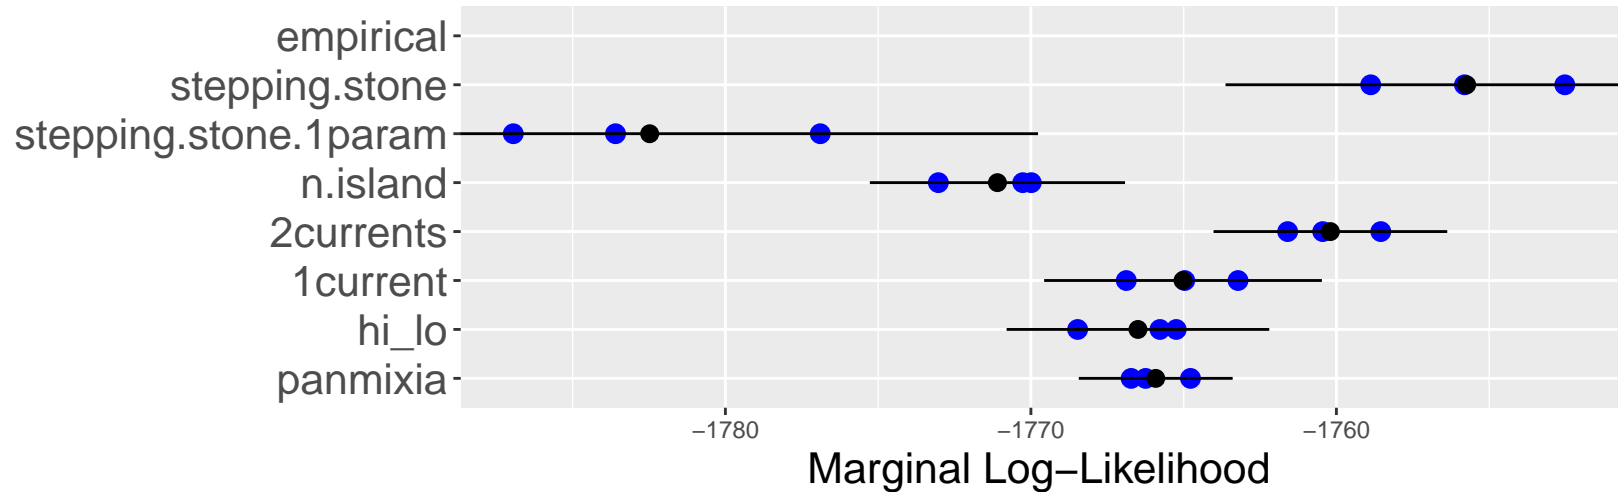

# Acanthurus olivaceus

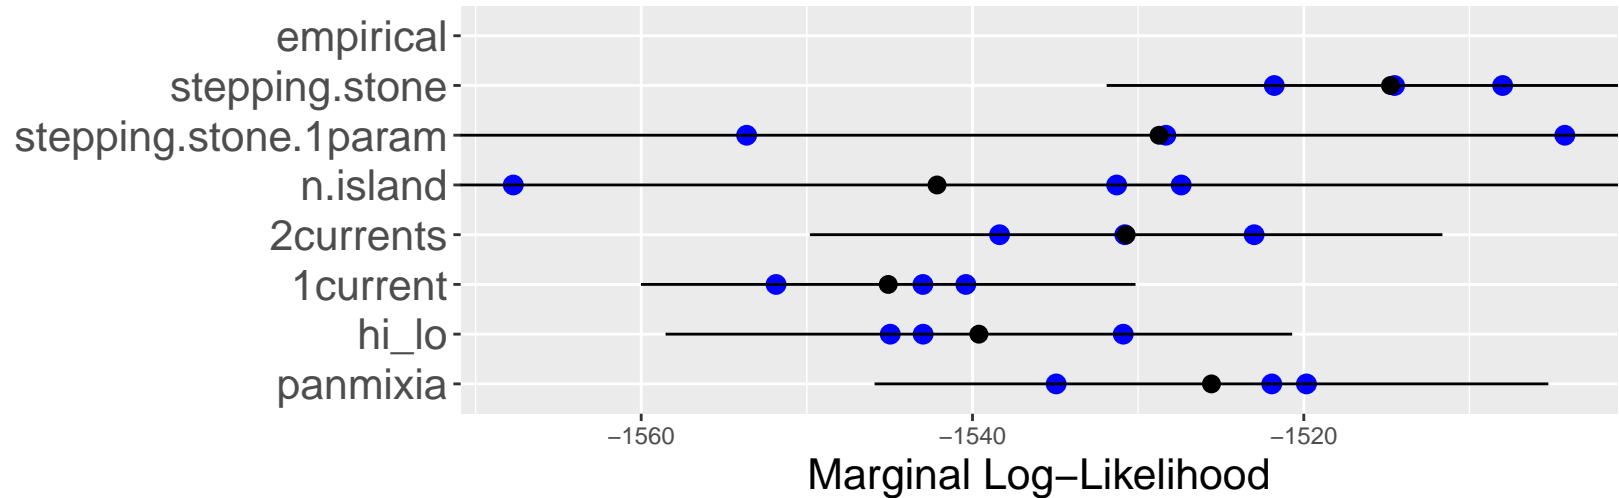

# Acanthaster planci

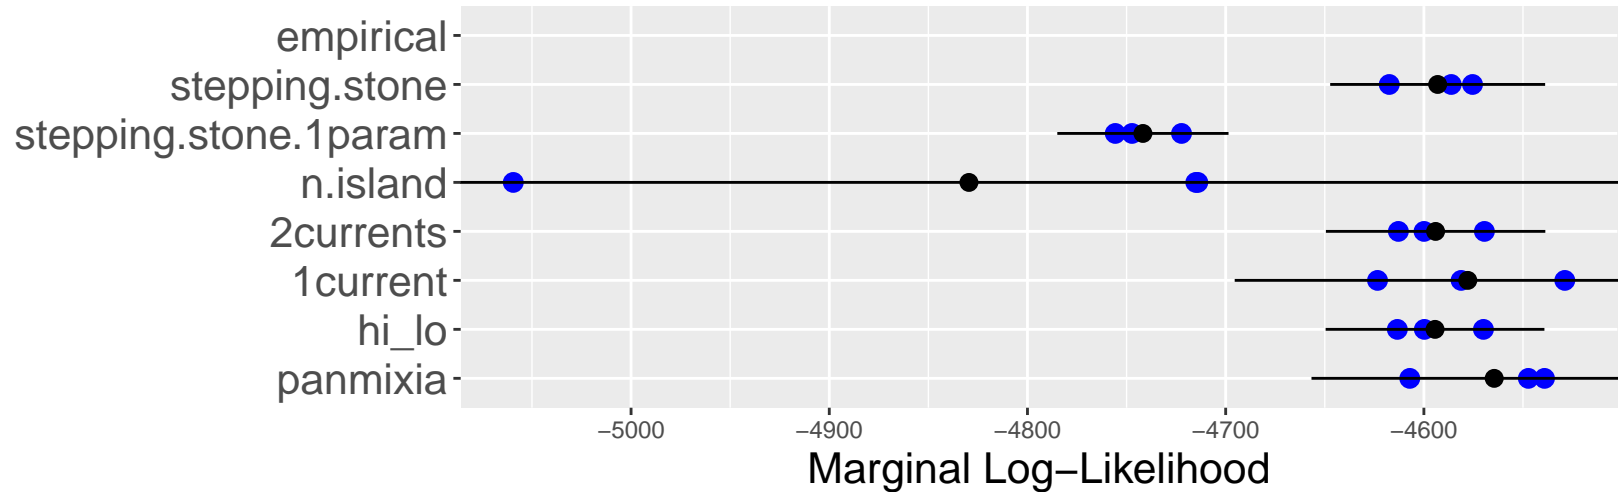

# Calcinus hazletti

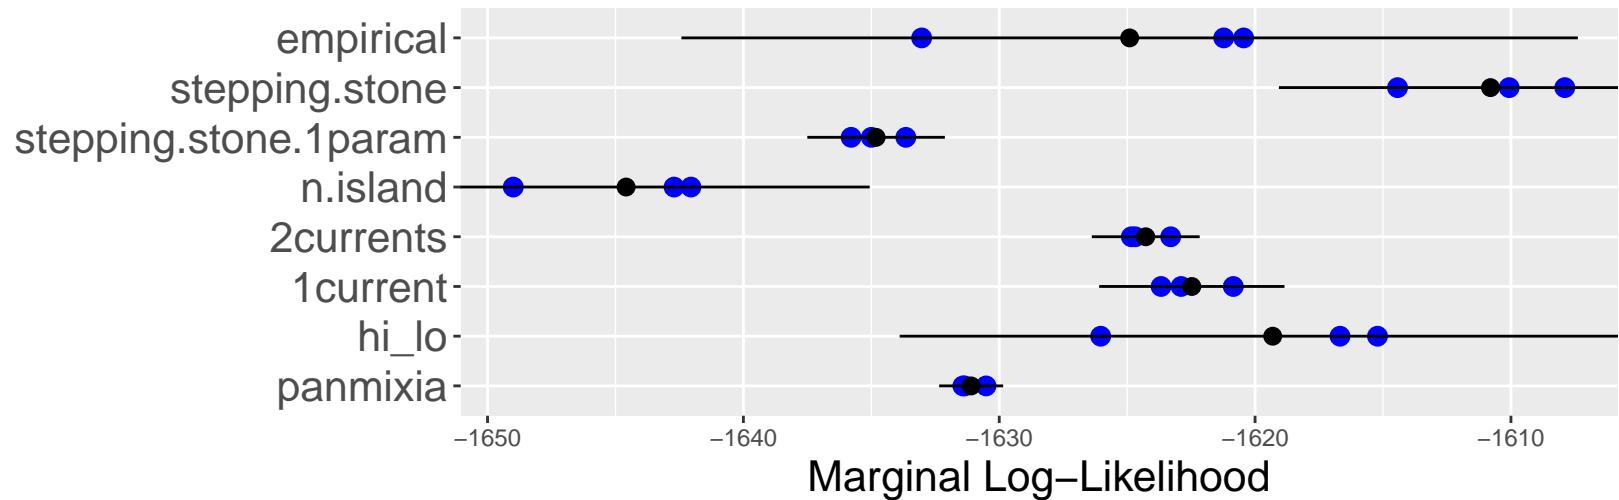

# Calcinus seurati

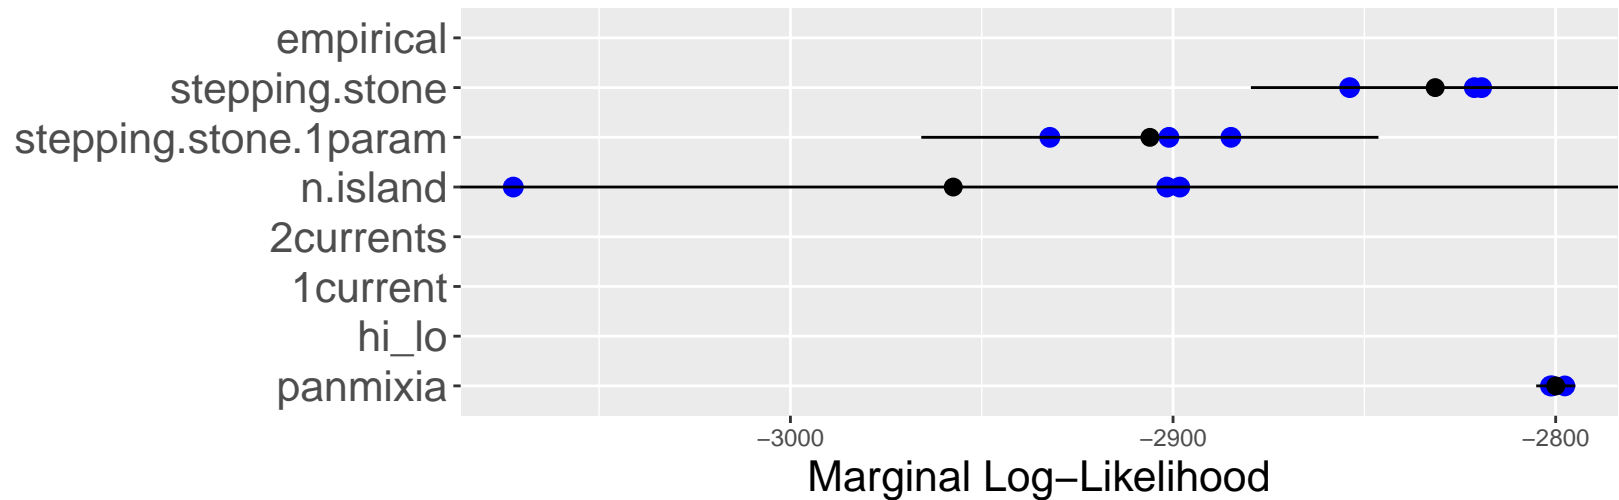



# Halichoeres ornatus

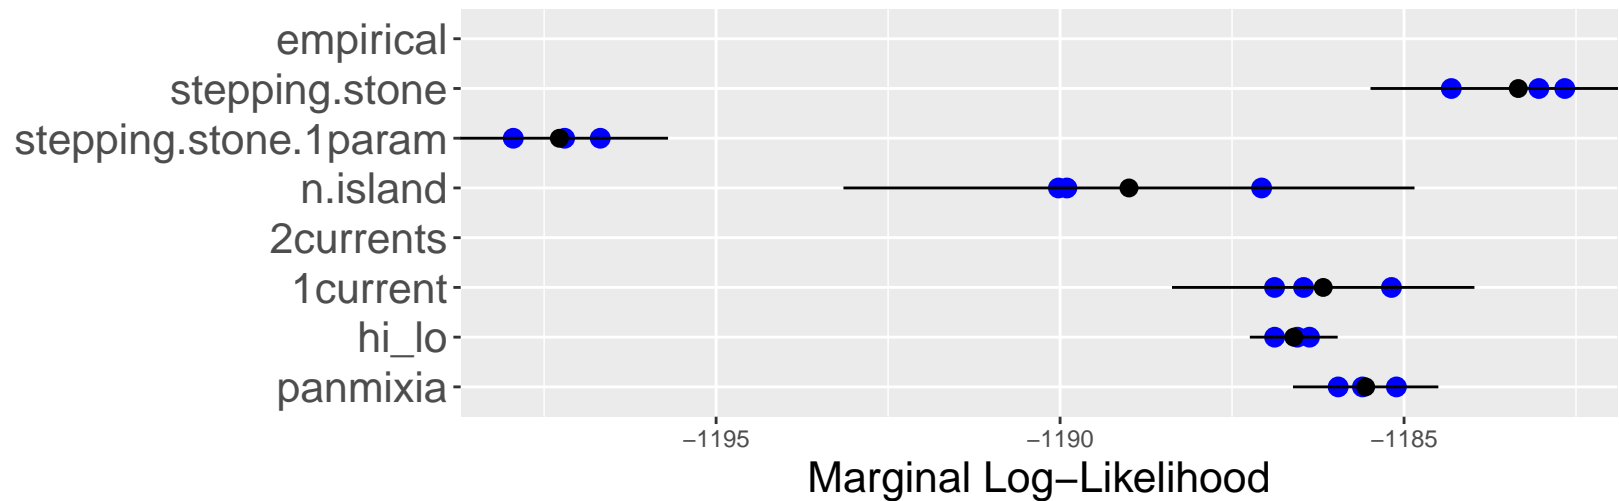

# Caranx melampygus

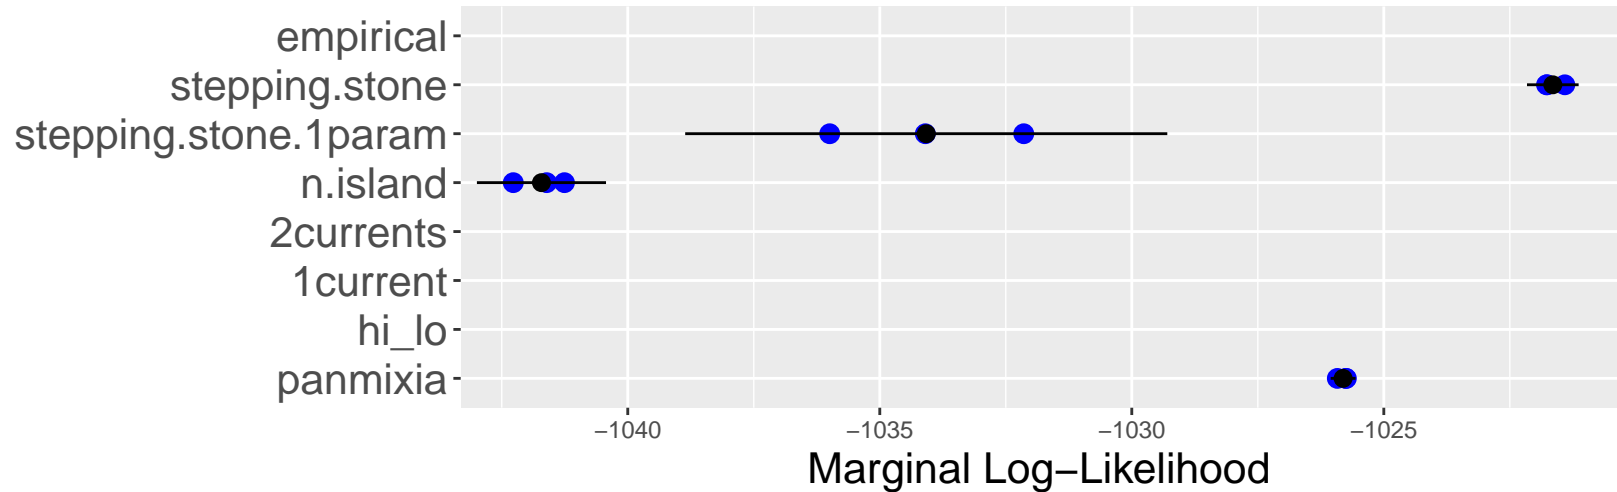

# Cellana exarata

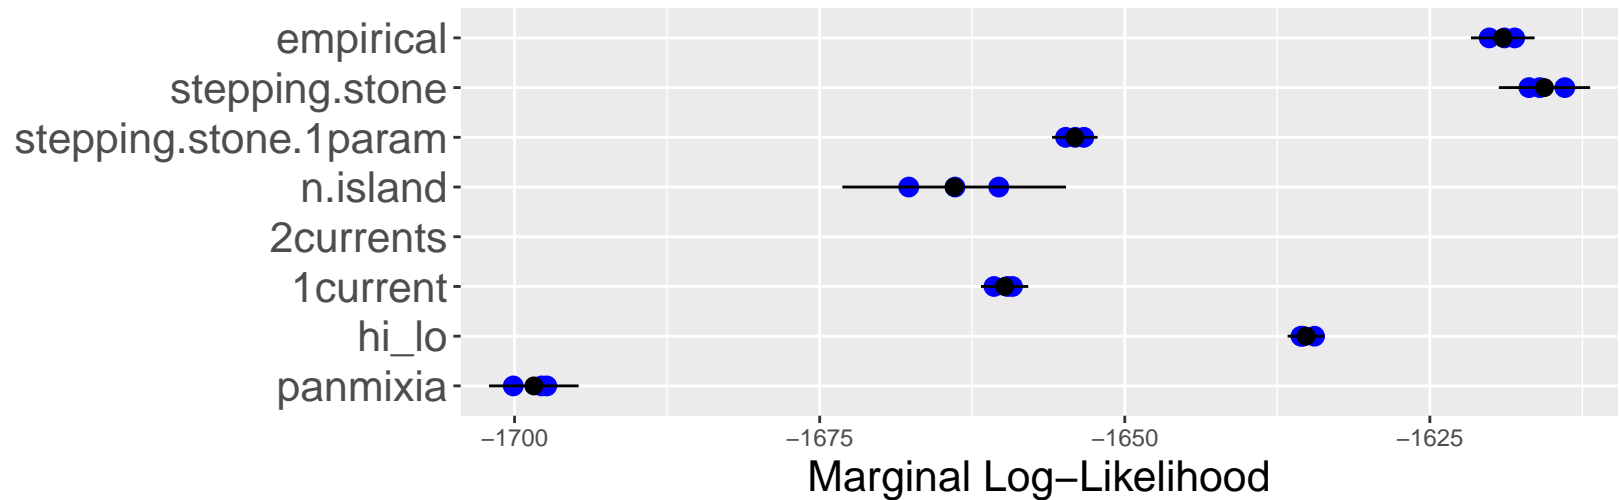

# Cellana sandwichensis

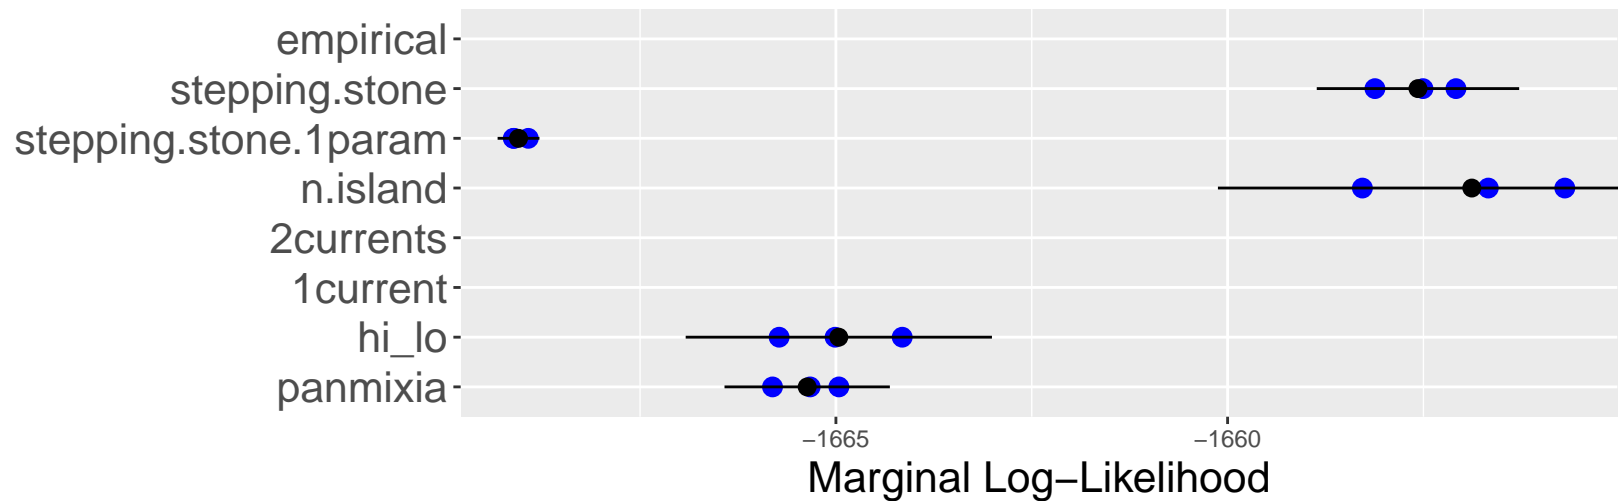

# Cellana talcosa

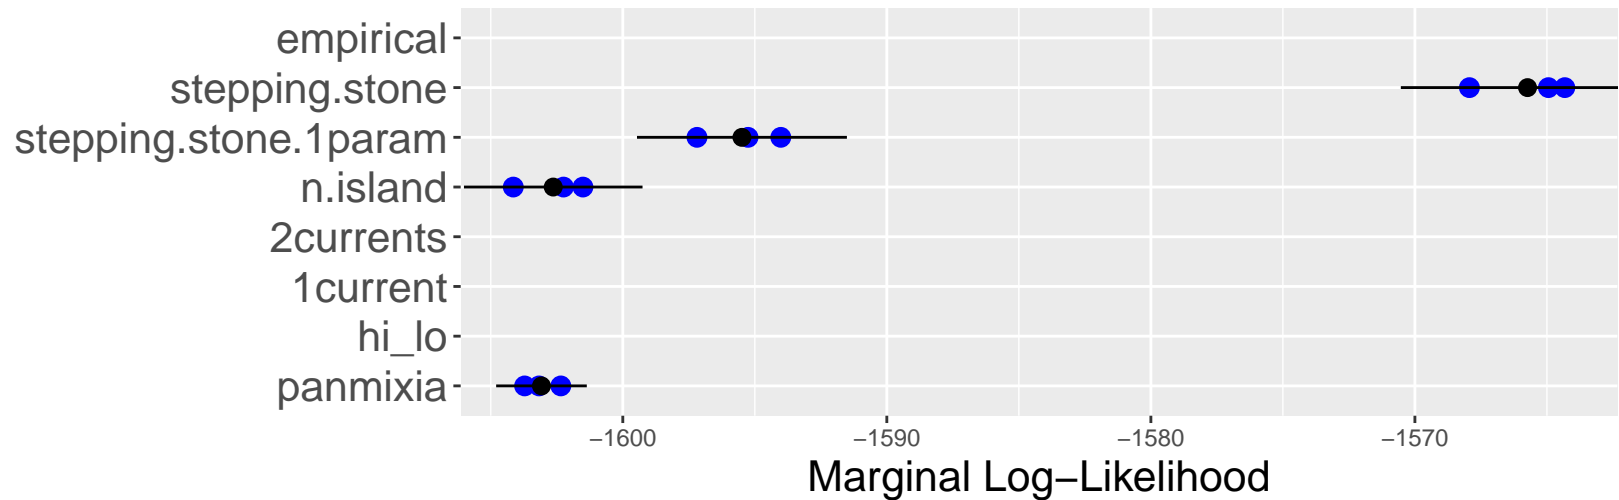

# Chaetodon fremblii

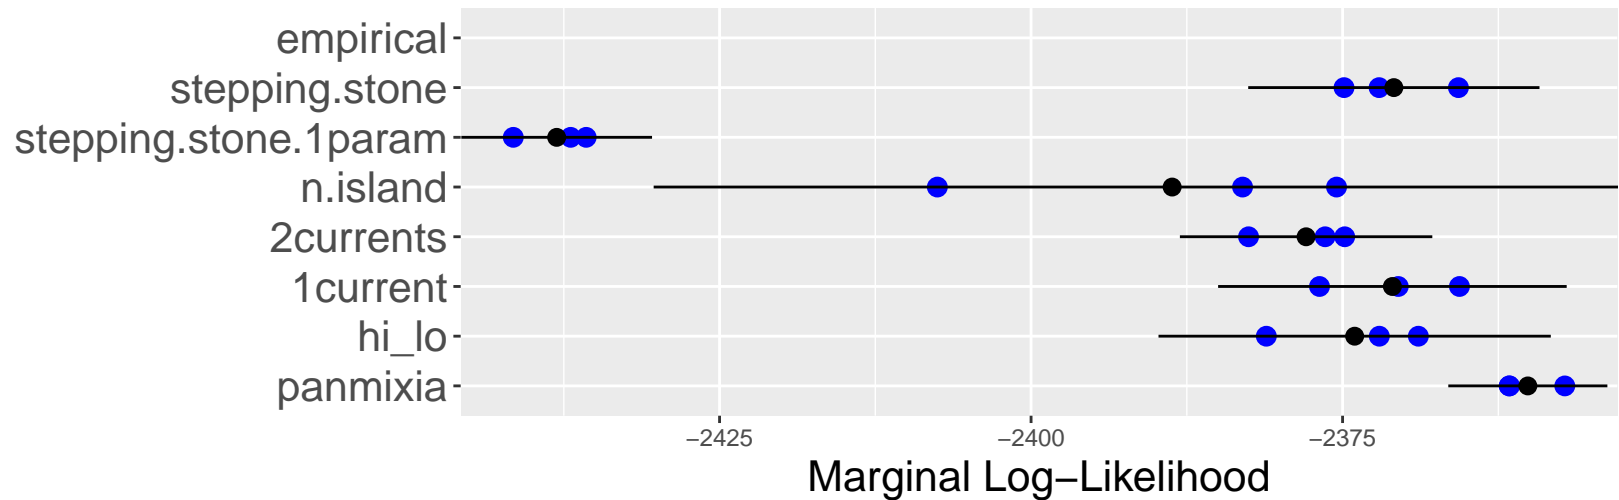

# Chaetodon lunulatus

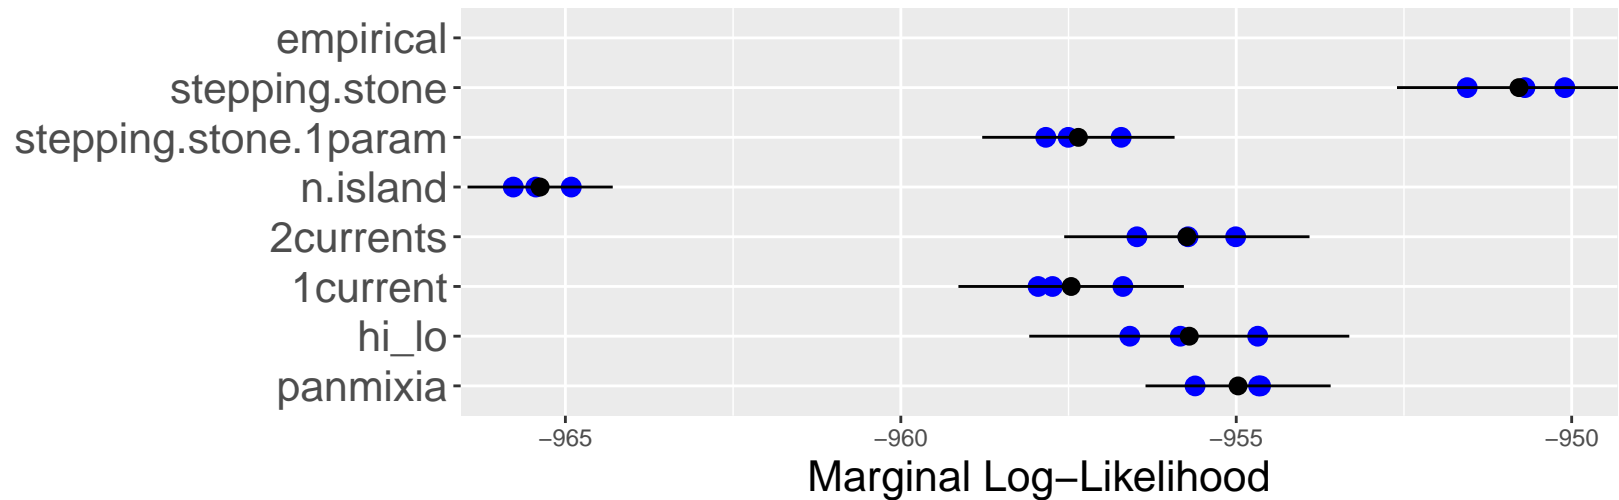

# Chaetodon miliaris

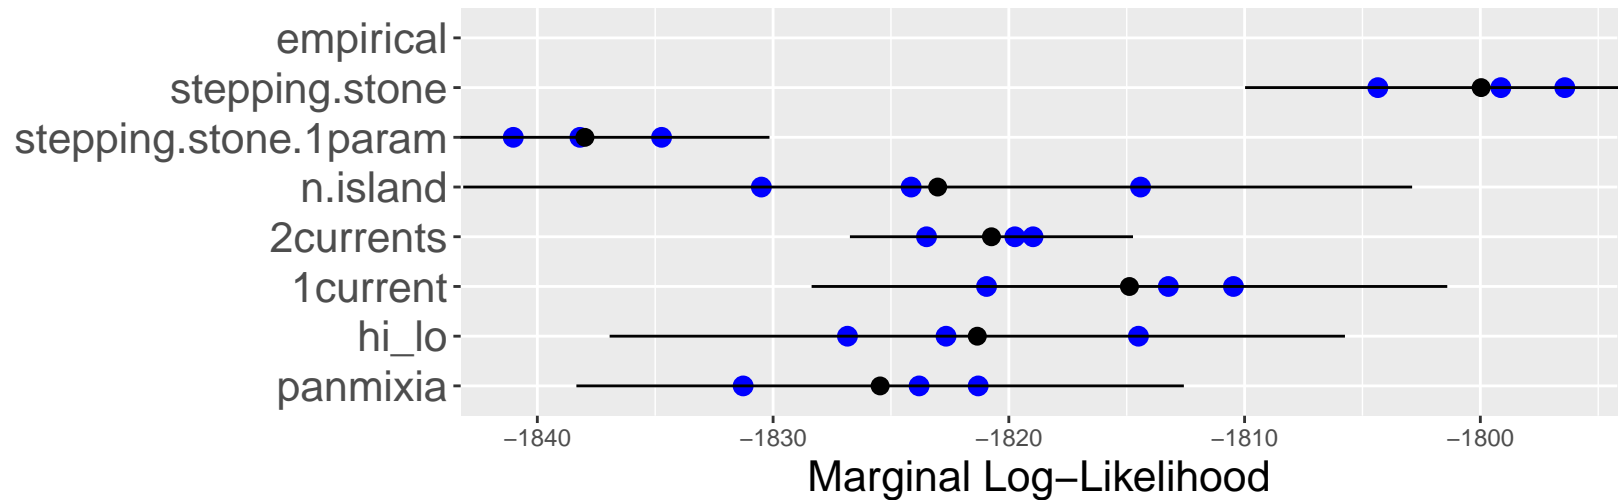



# Chaetodon multincinctus

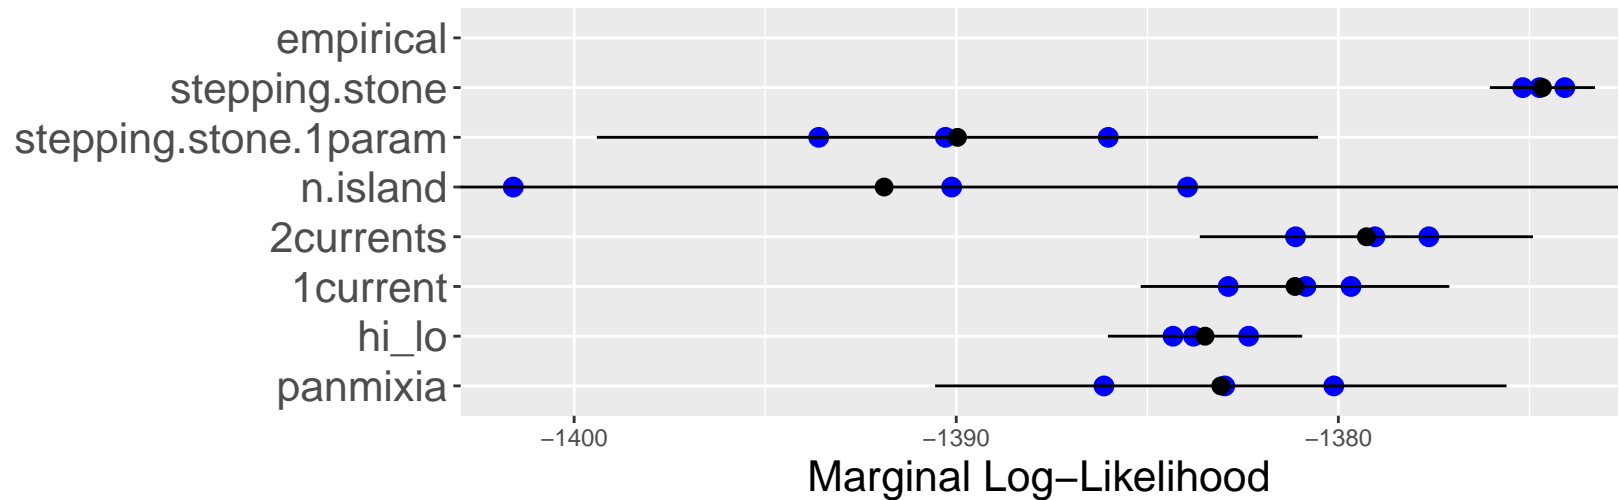

# Ctenochaetus strigosus

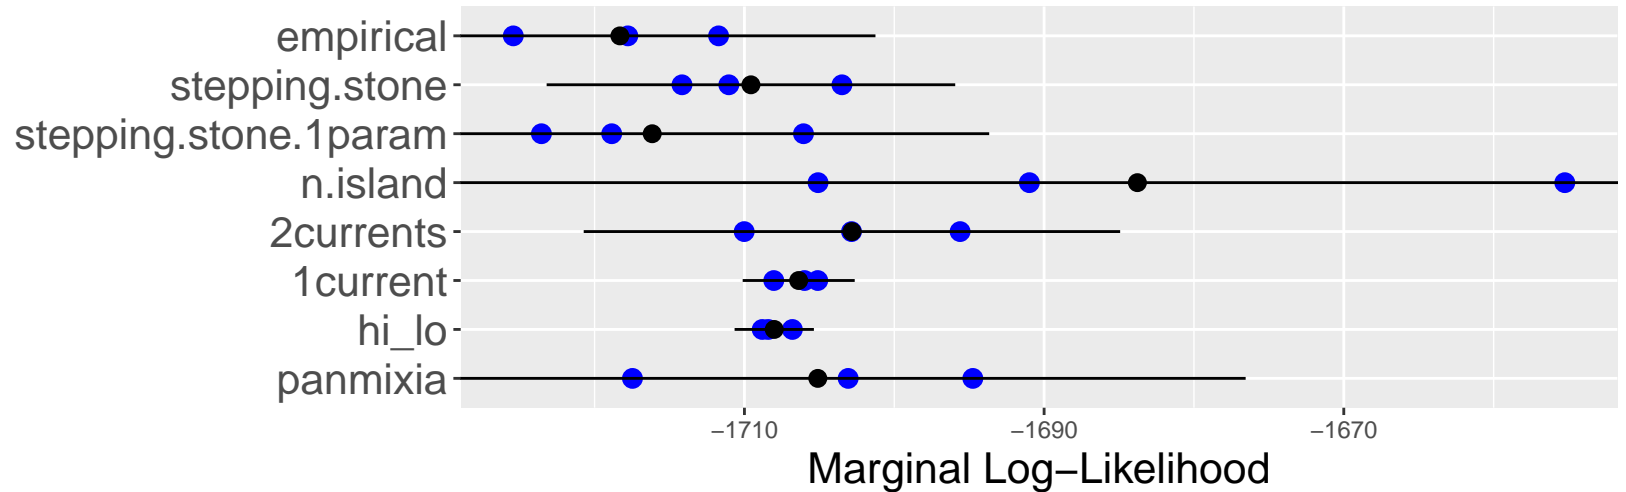

# Dascyllus albisella

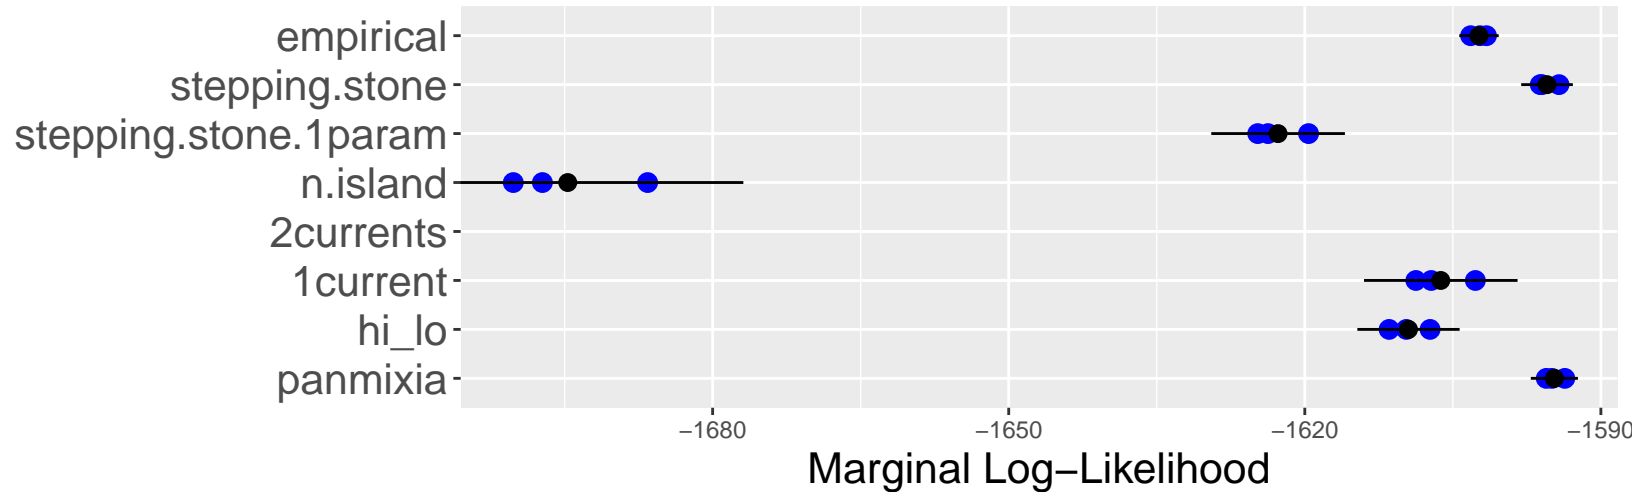

# Epinephelus quernus

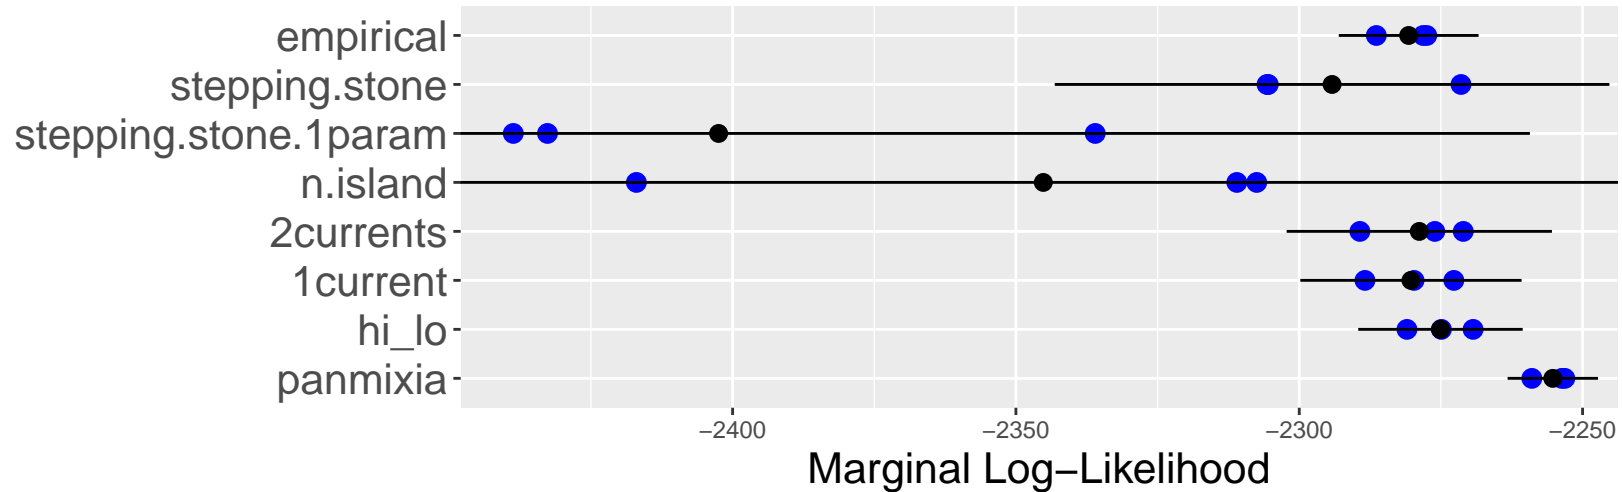

# Etelis marshi

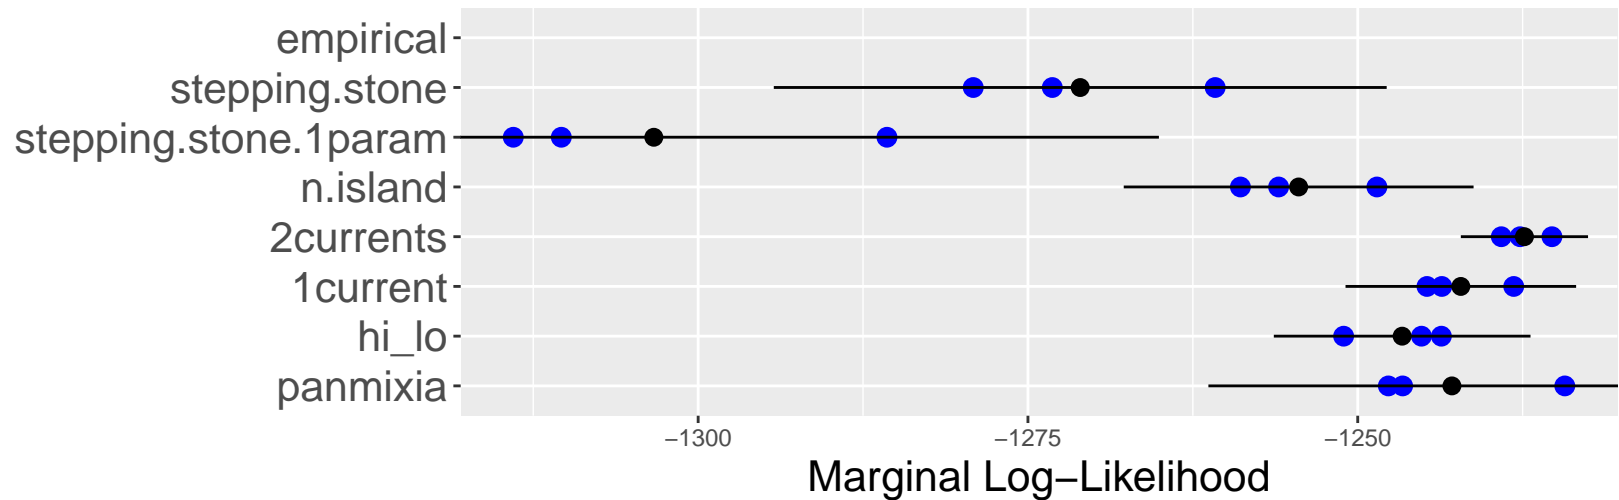

# Gymnothorax flavimarginatus

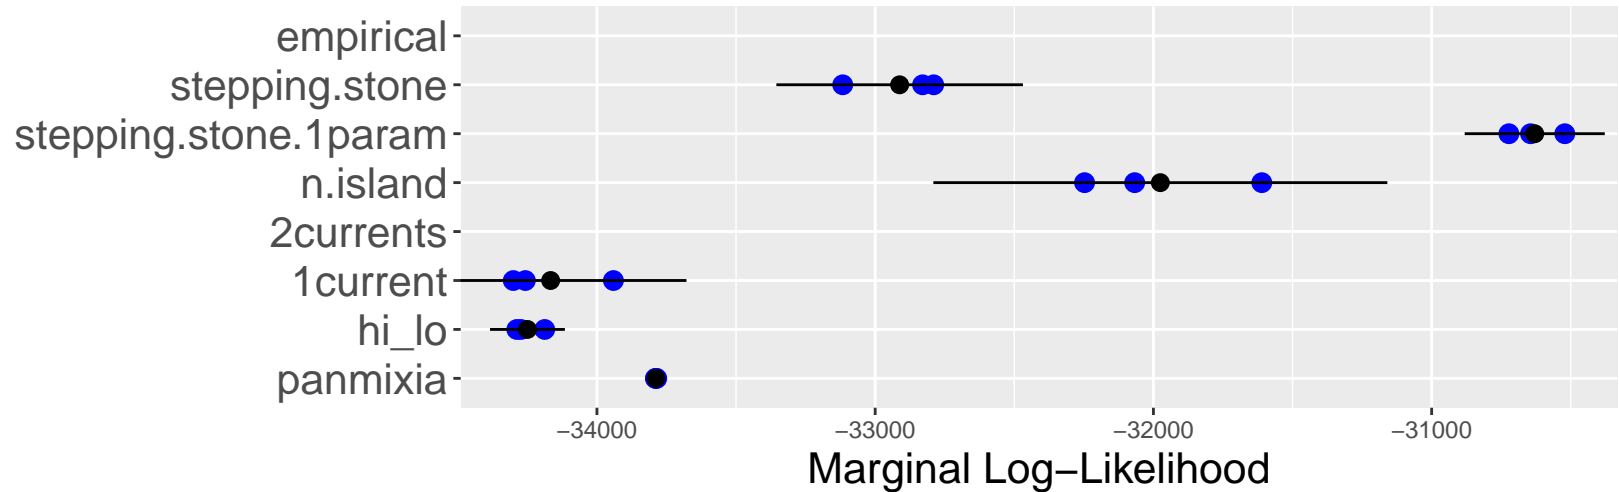

# Gymnothorax undulatus

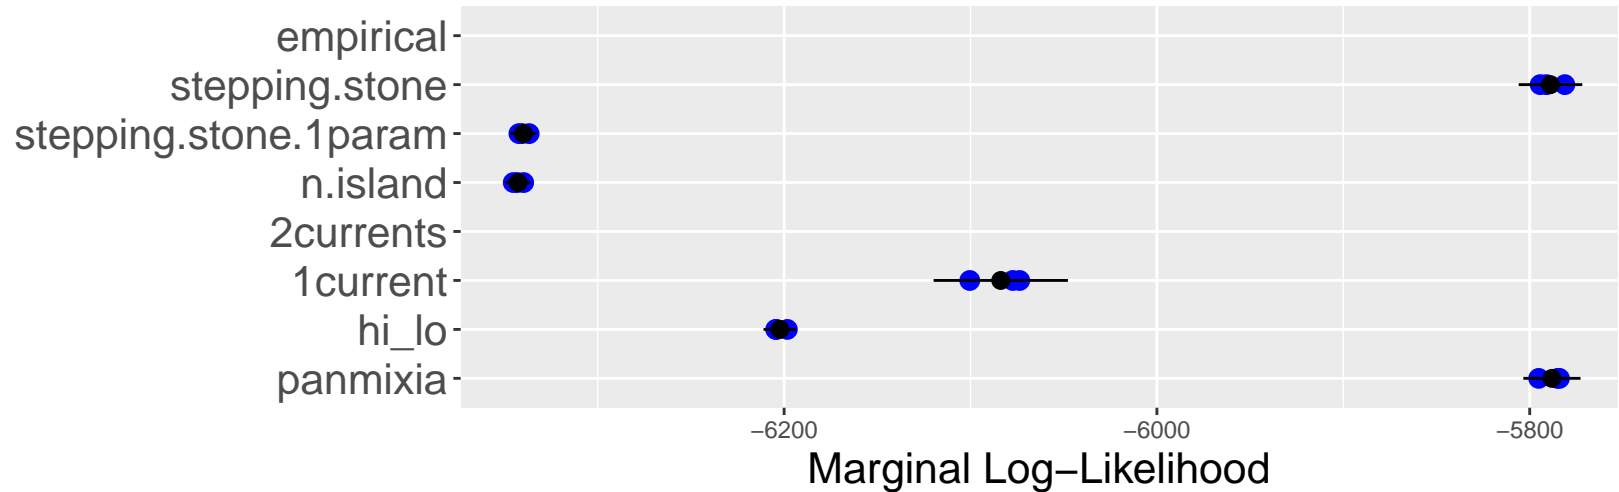

# Heterocentrotus mammillatus

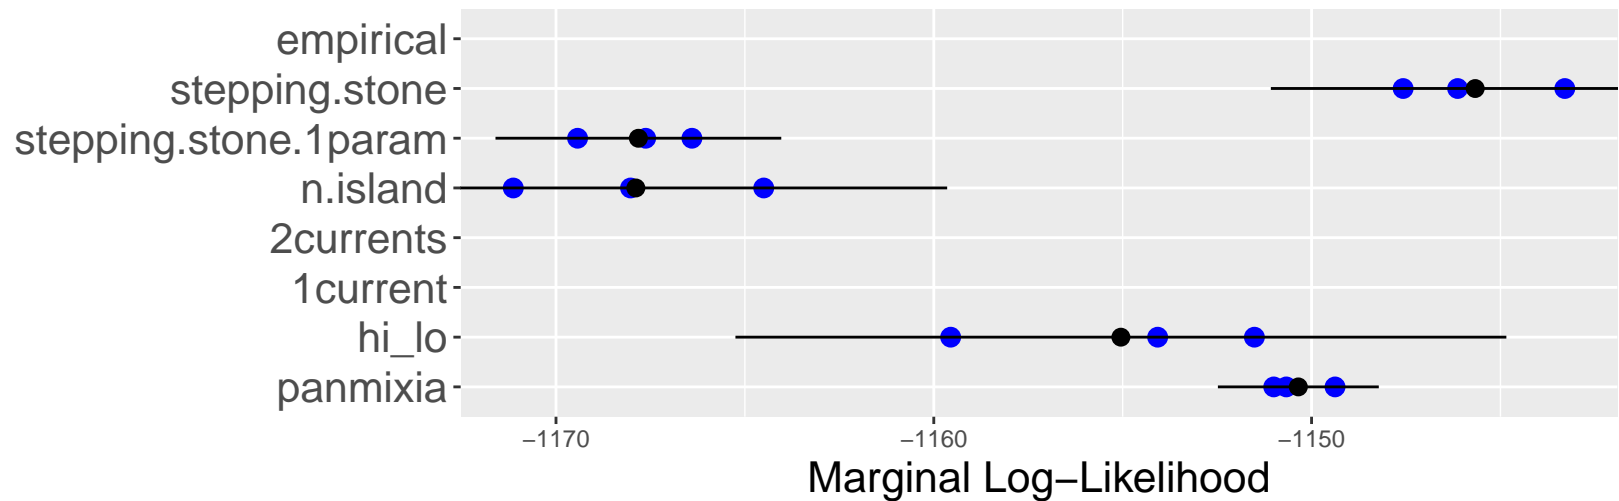



# Holothuria atra

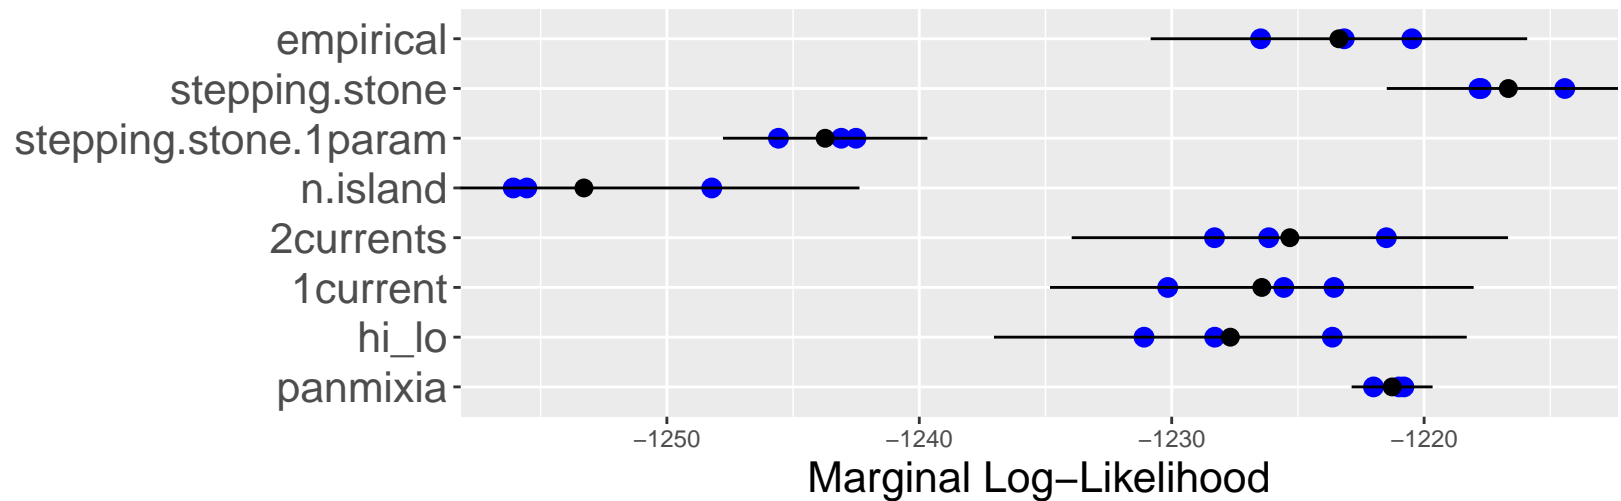

# Holothuria whitmaei

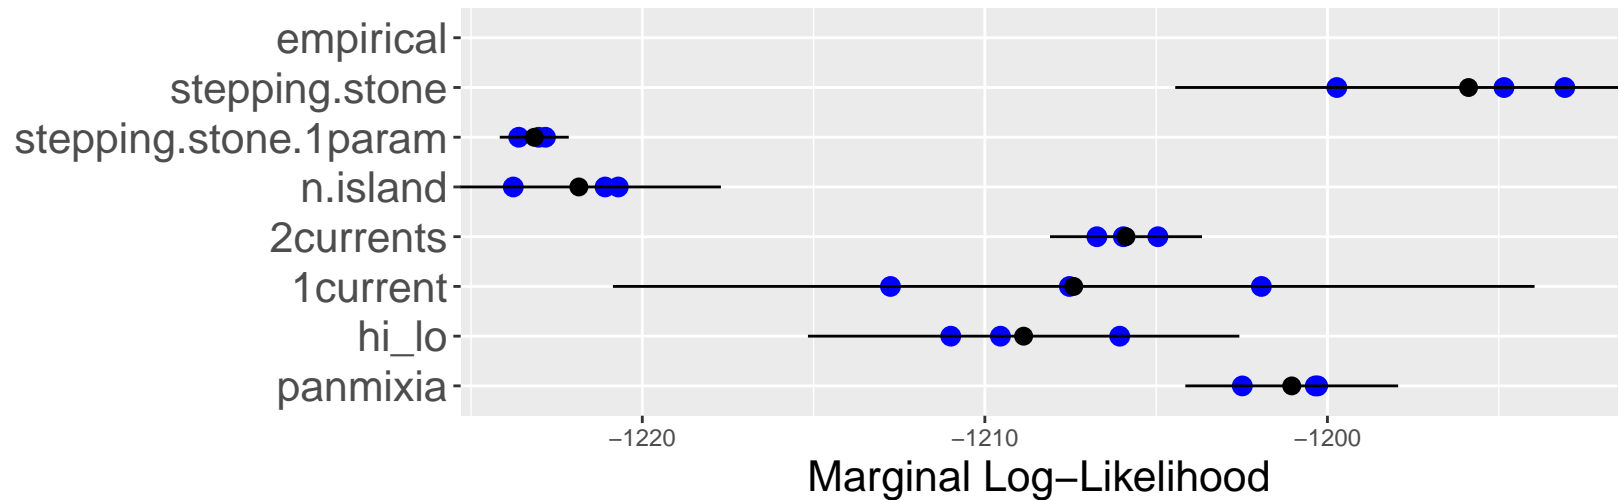

# Lutjanus kasmira

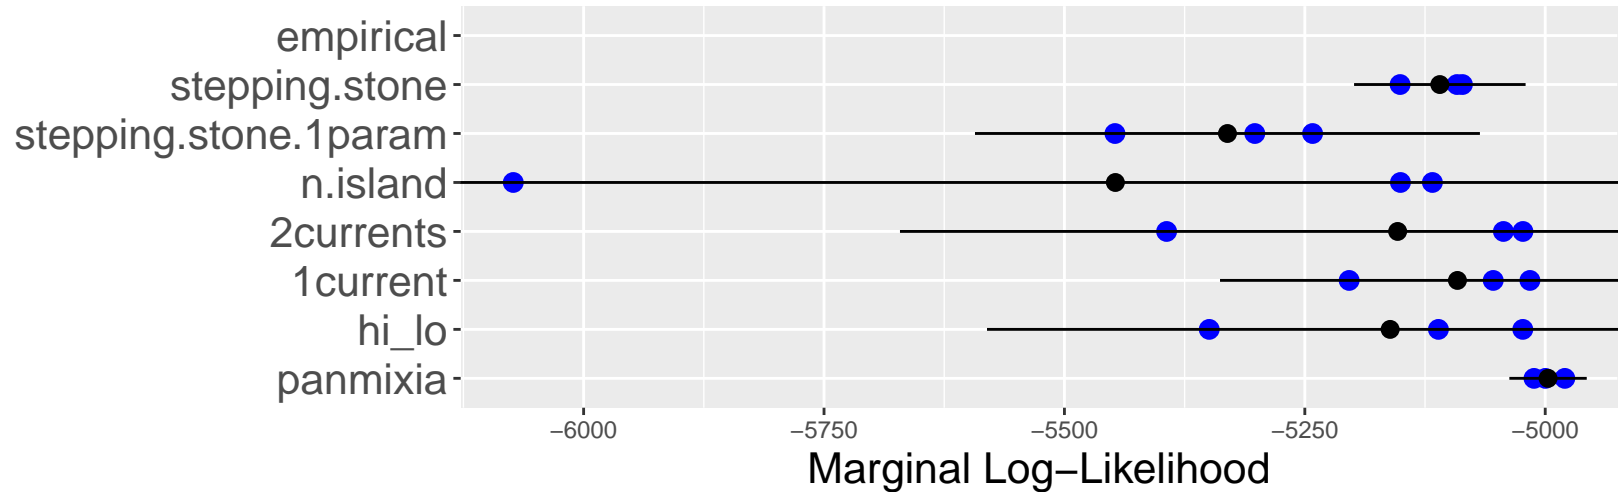

# Mulloidichthys flavolineatus

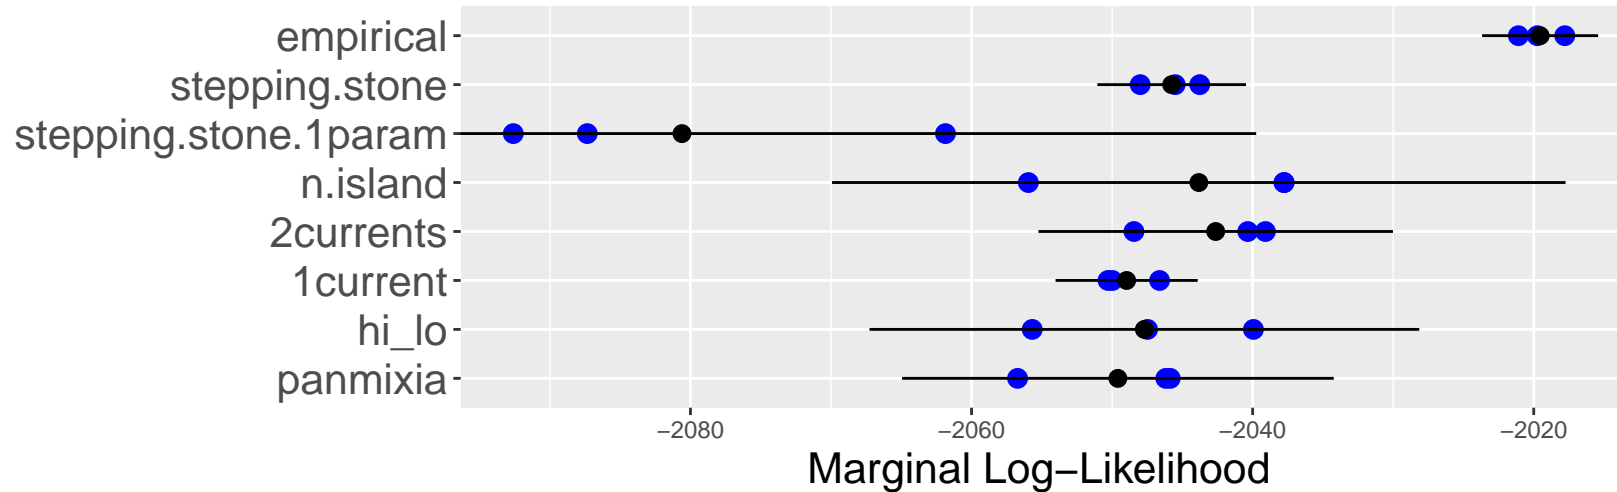

# Mulloidichthys vanicolensis

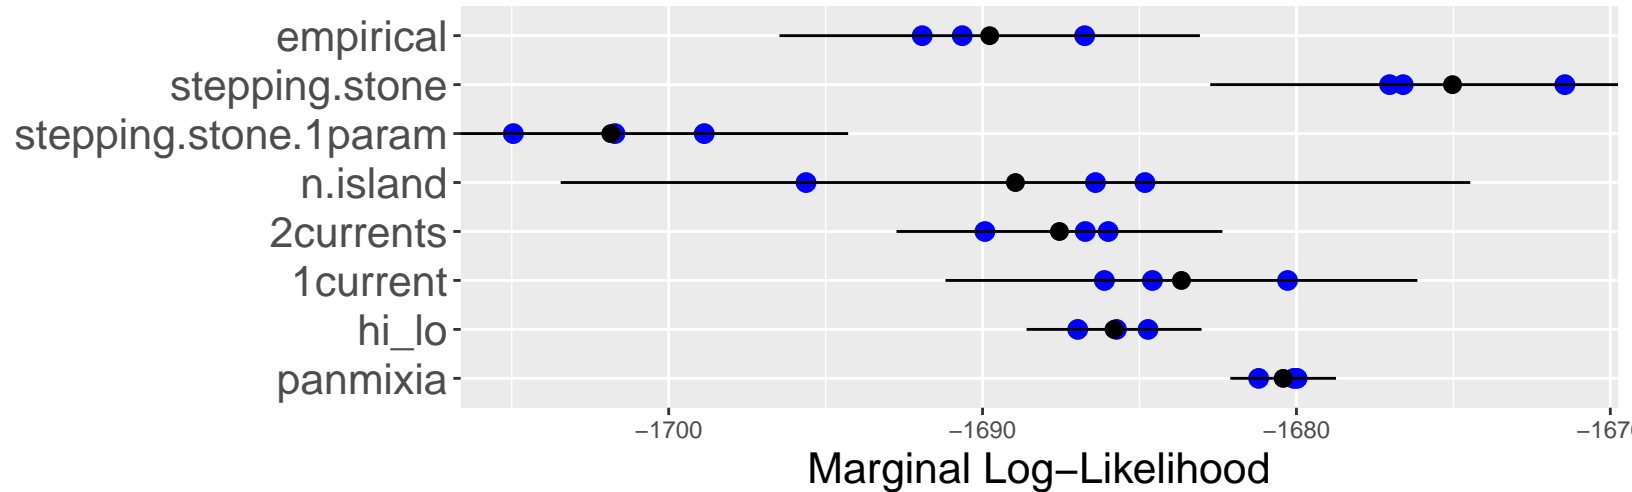

# Myripristis berndtii

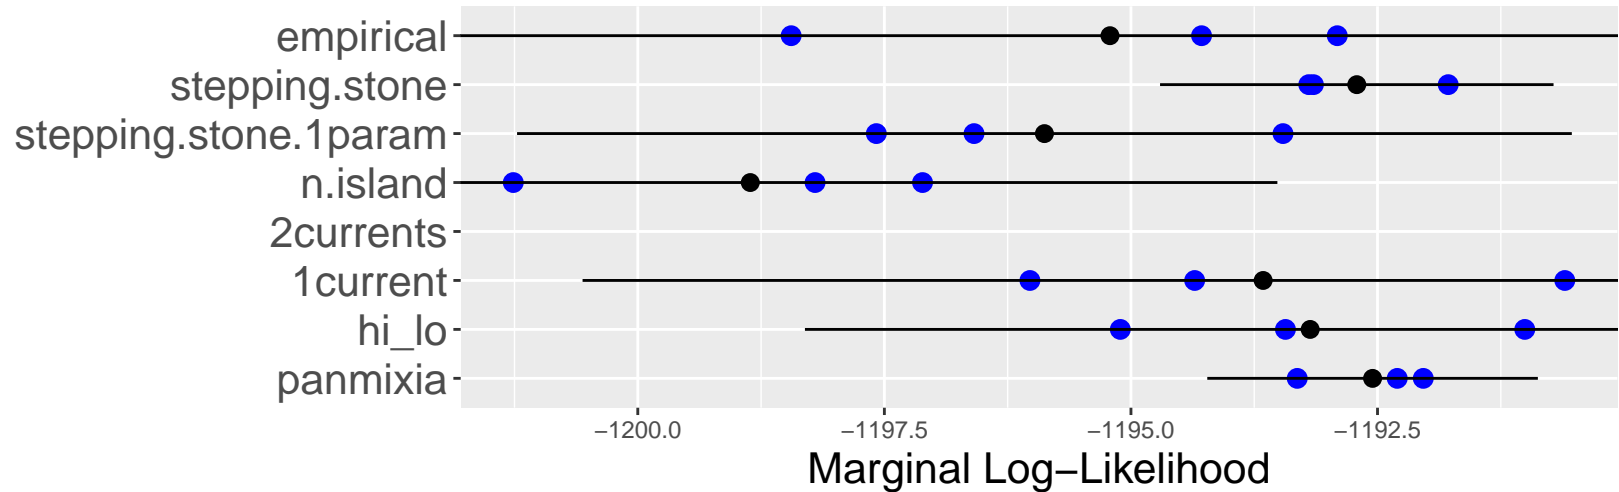

# Ophiocoma erinaceus

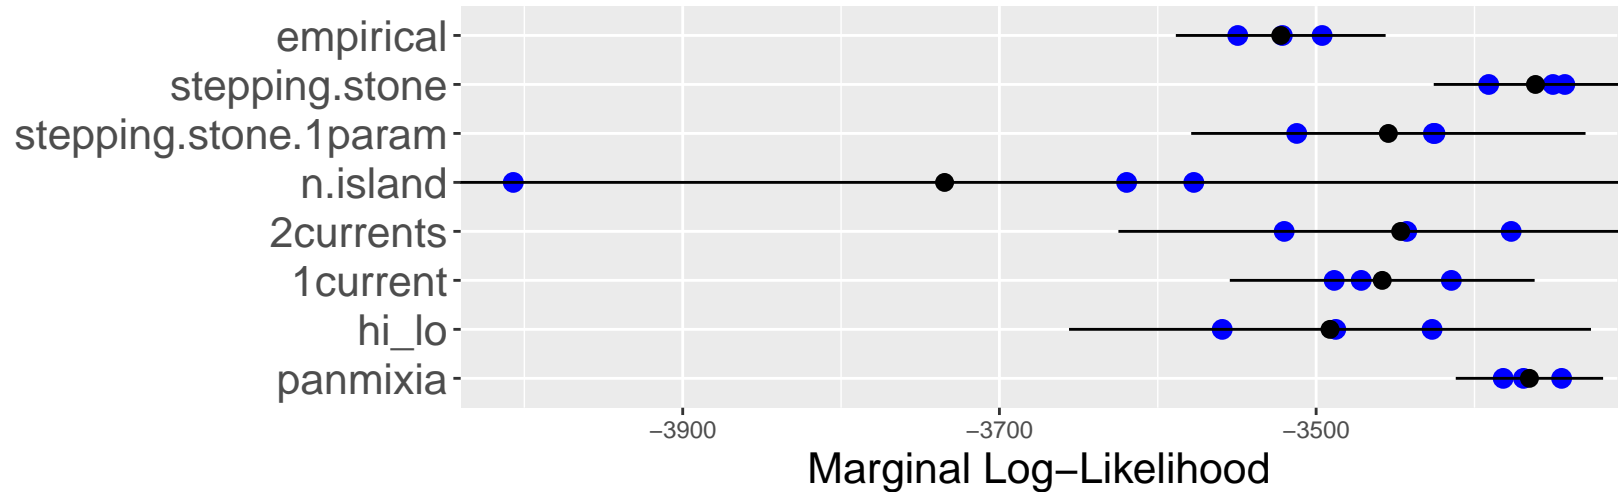

# Ophiocoma pica

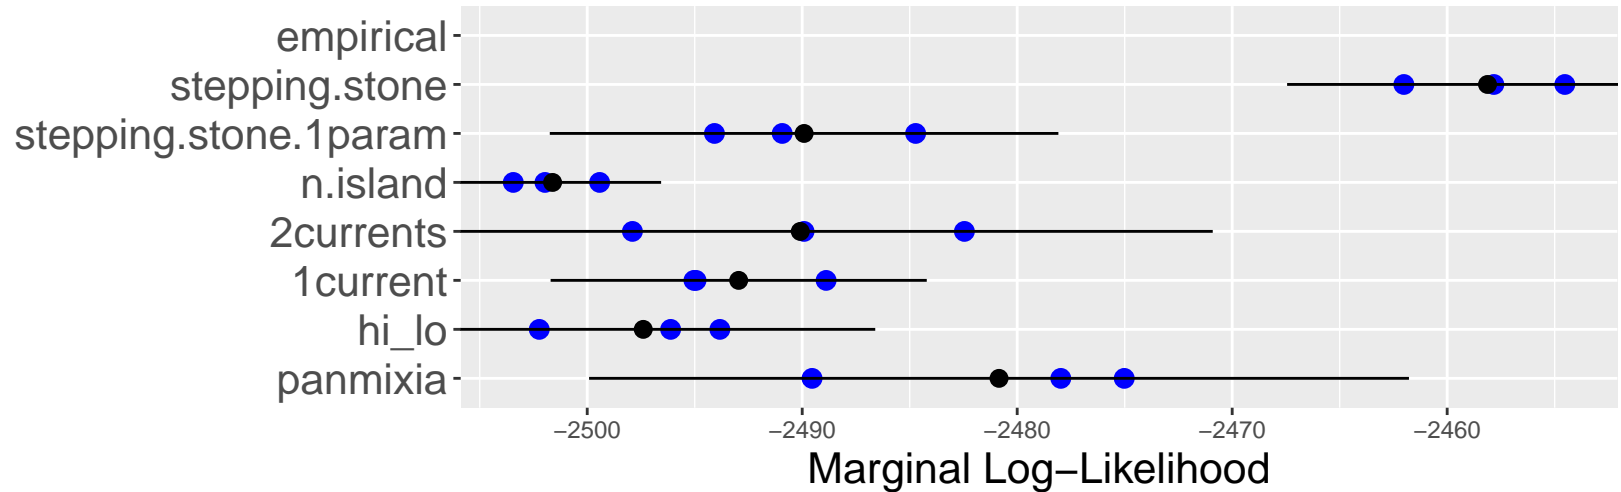



# Panulirus marginatus

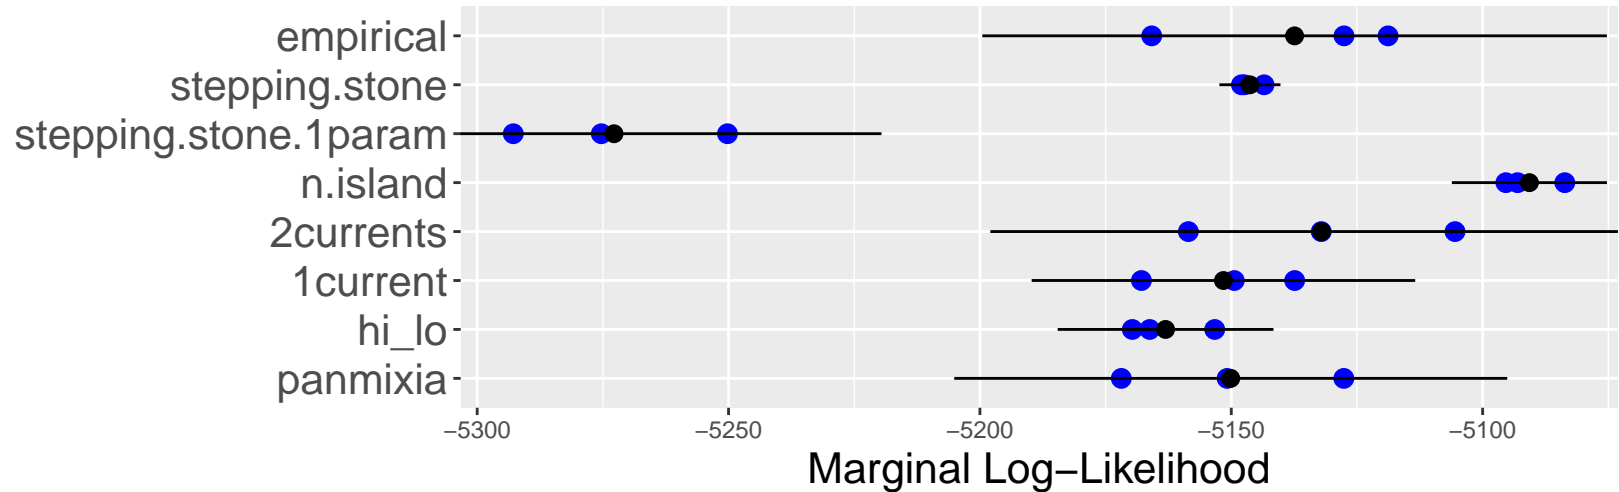

# Panulirus penicillatus

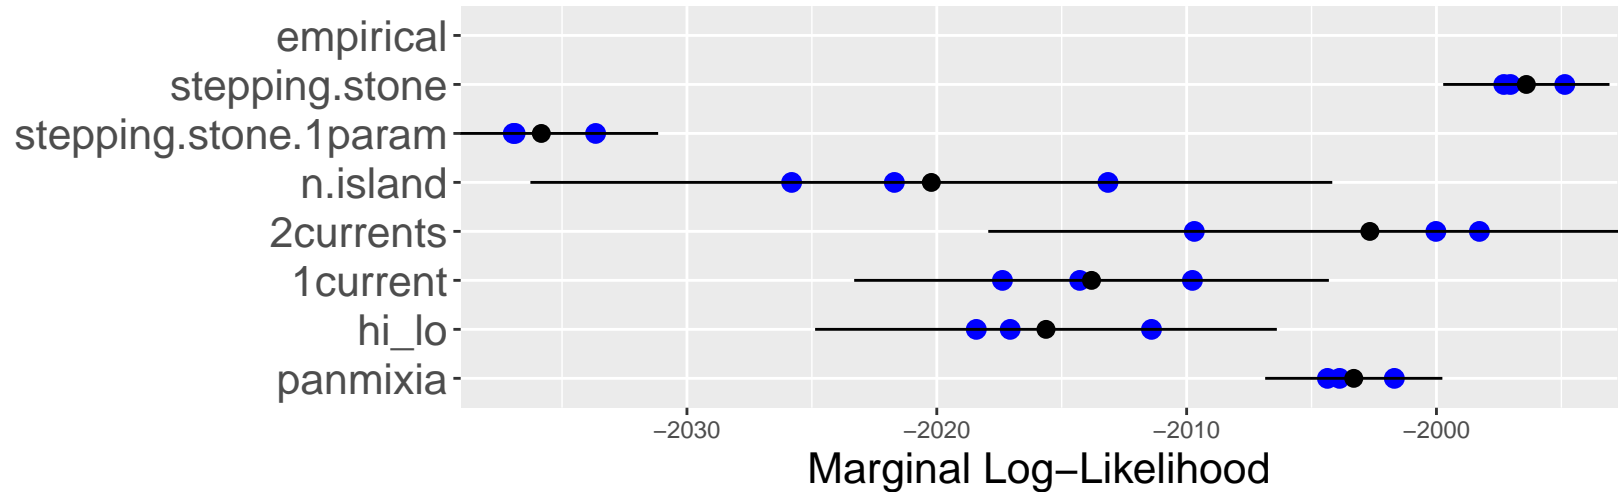

# Parupeneus multifasciatus

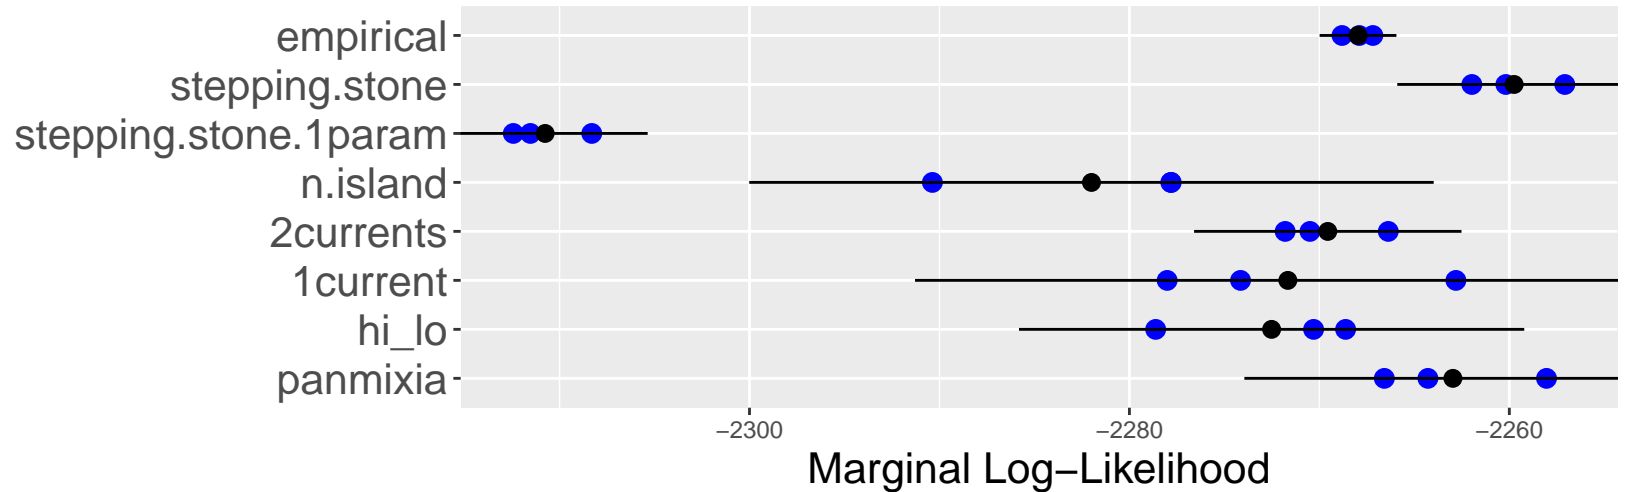

# Pristipomoides filamentosus

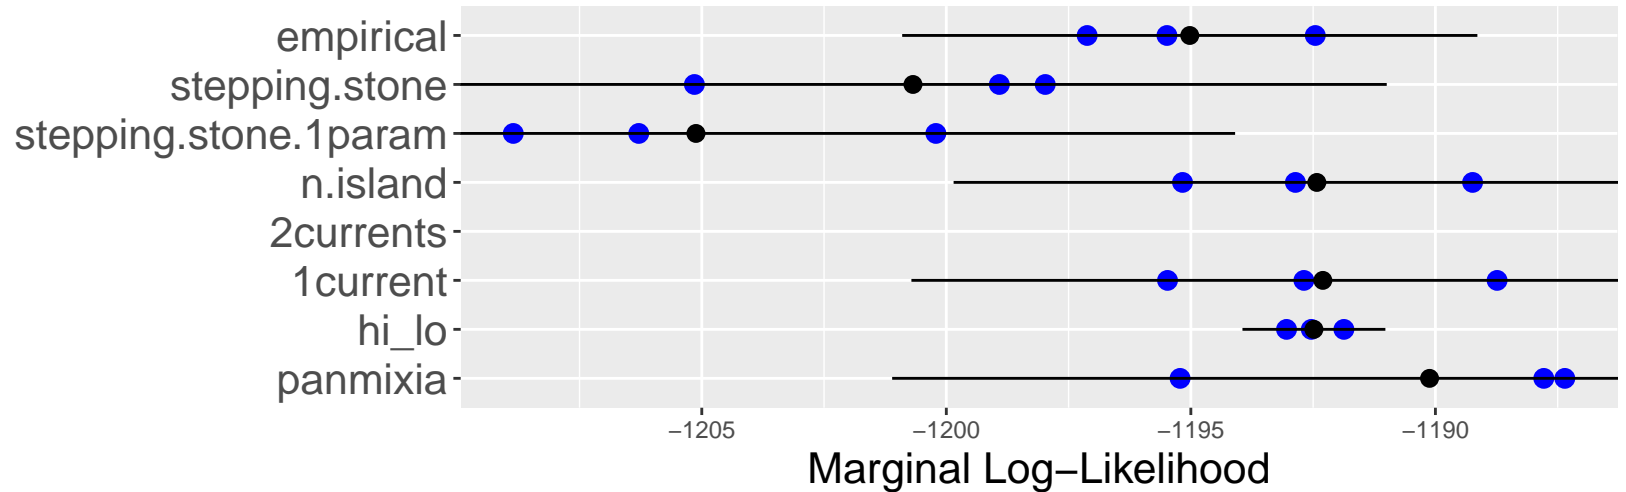

# Squalus mitsukurii

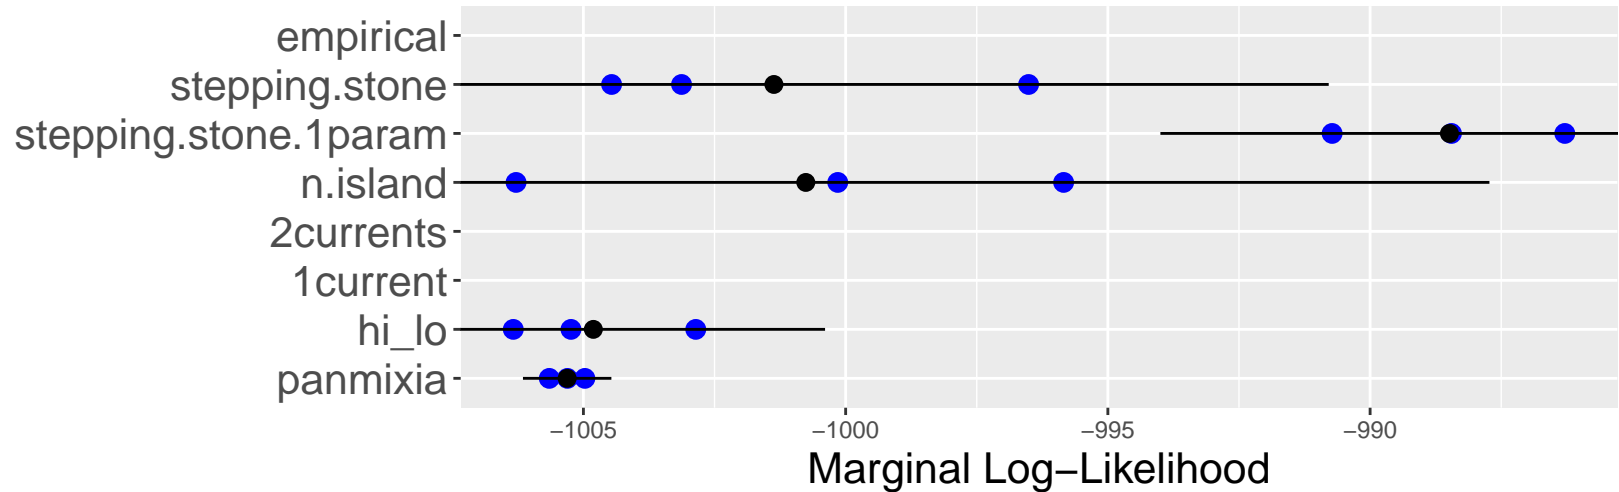

# Stegastes fasciolatus

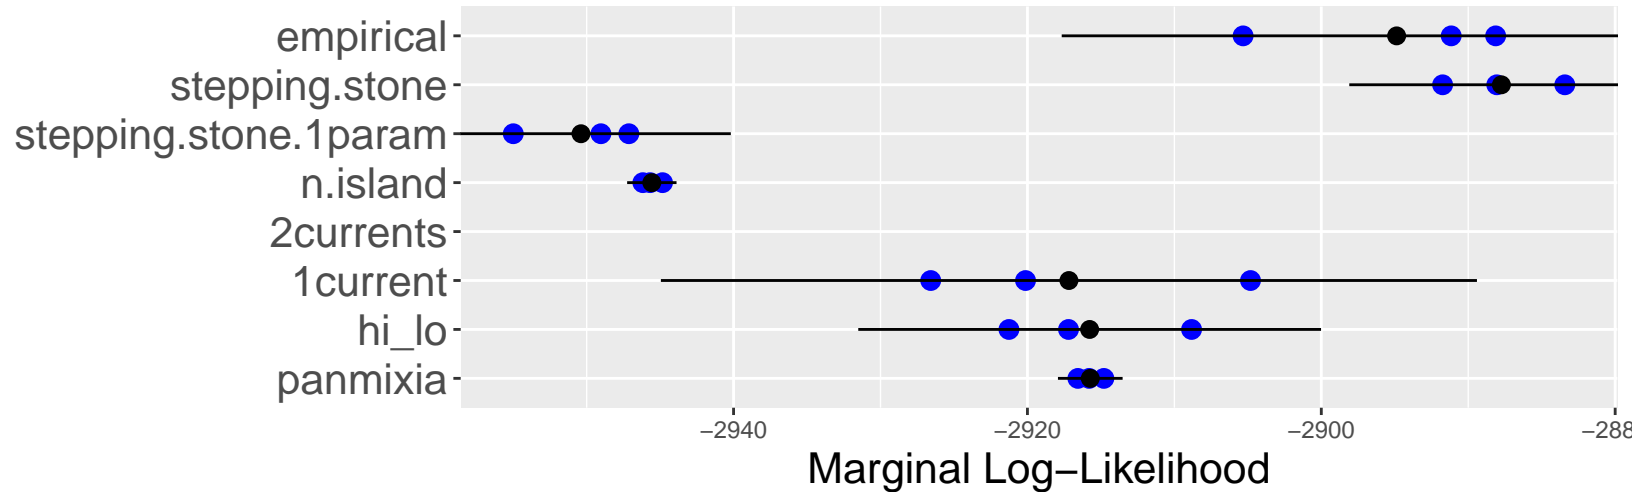

# Stenella longirostris

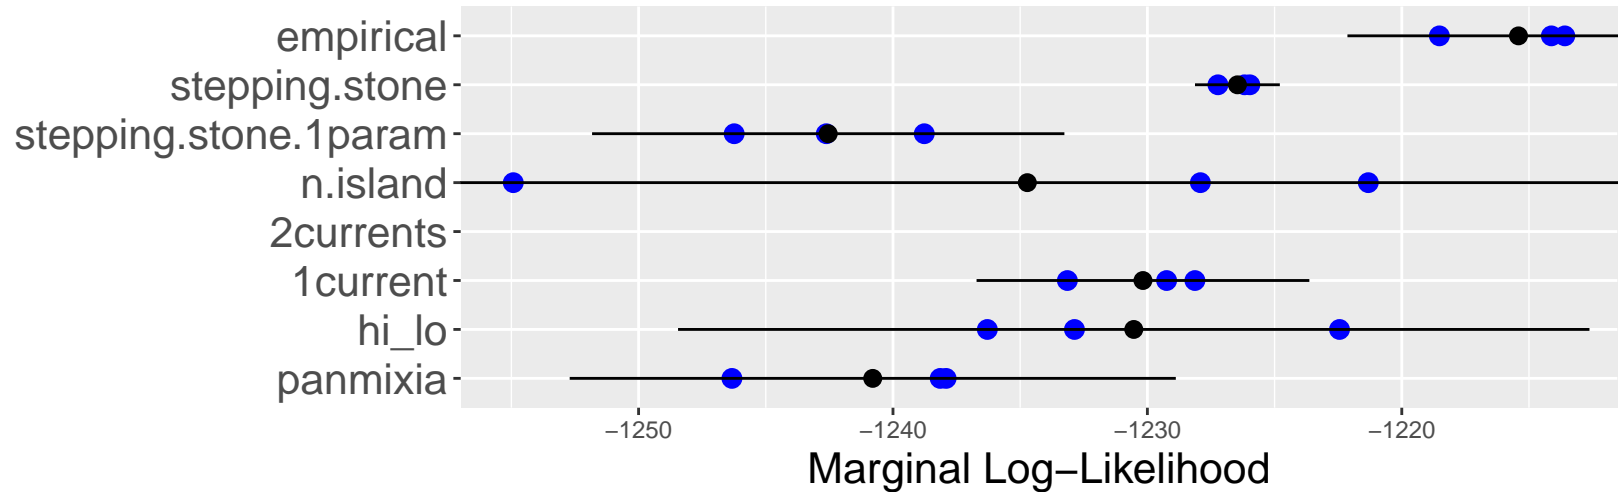

# Triaenodon obesus

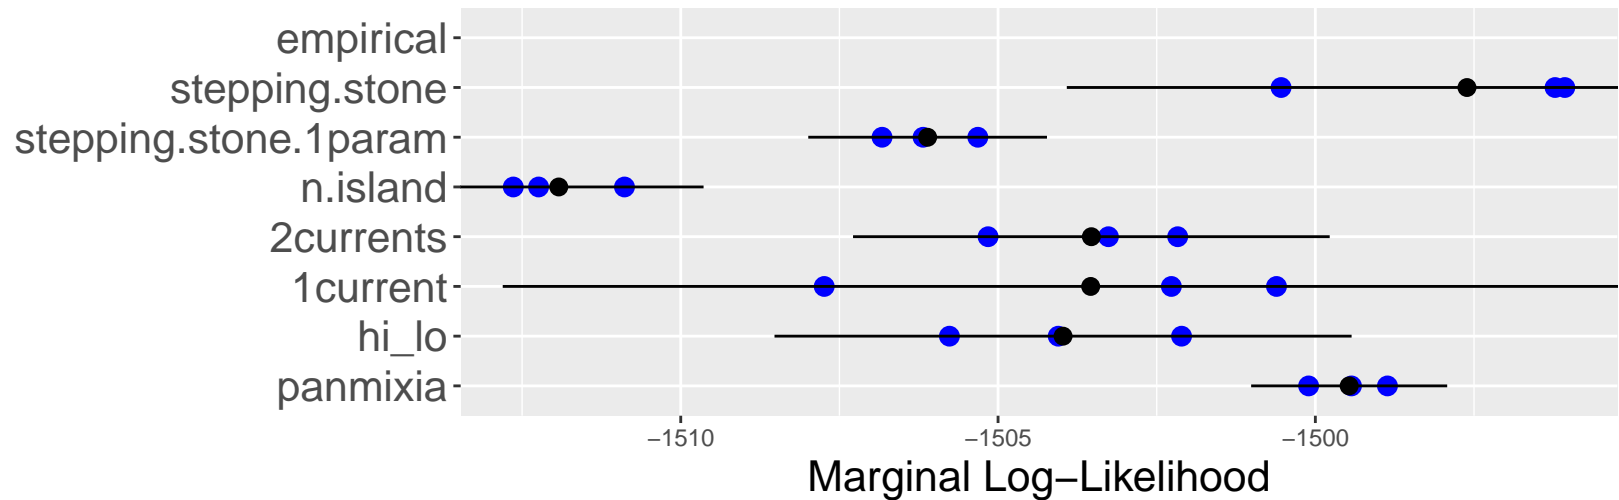



# Zebrasoma flavescens

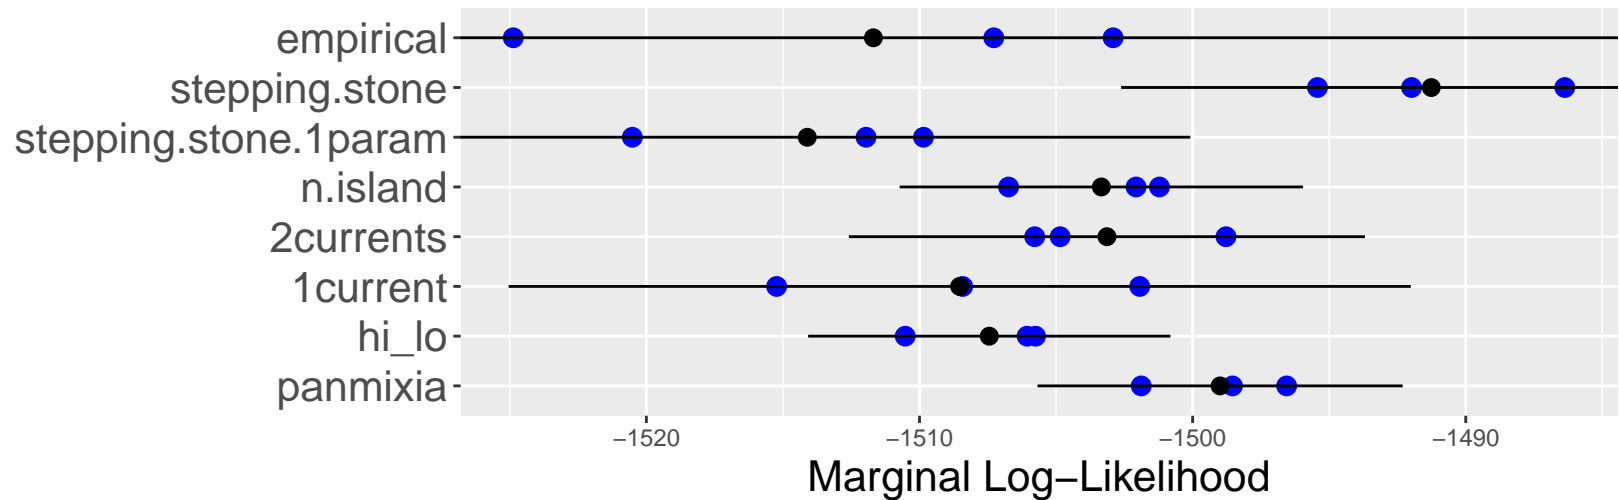

Supplement: EVA-12-255-s001.pdf [file EVA-12-255-s001.pdf]
