# Supplementary material for: A coalescent sampler successfully detects biologically meaningful population structure overlooked by F‐statistics
Source: PubMed Central journal article supplement (PMC6346657; doi:10.1111/eva.12712), 2018-10-15

Abudefduf abdominalis

Hawaii to Maui

Maui to Hawaii

0.001 0.01 0.1 1 10 100 1,000 10,000 100,000

Effective Female Migrants per Generation

Parameter

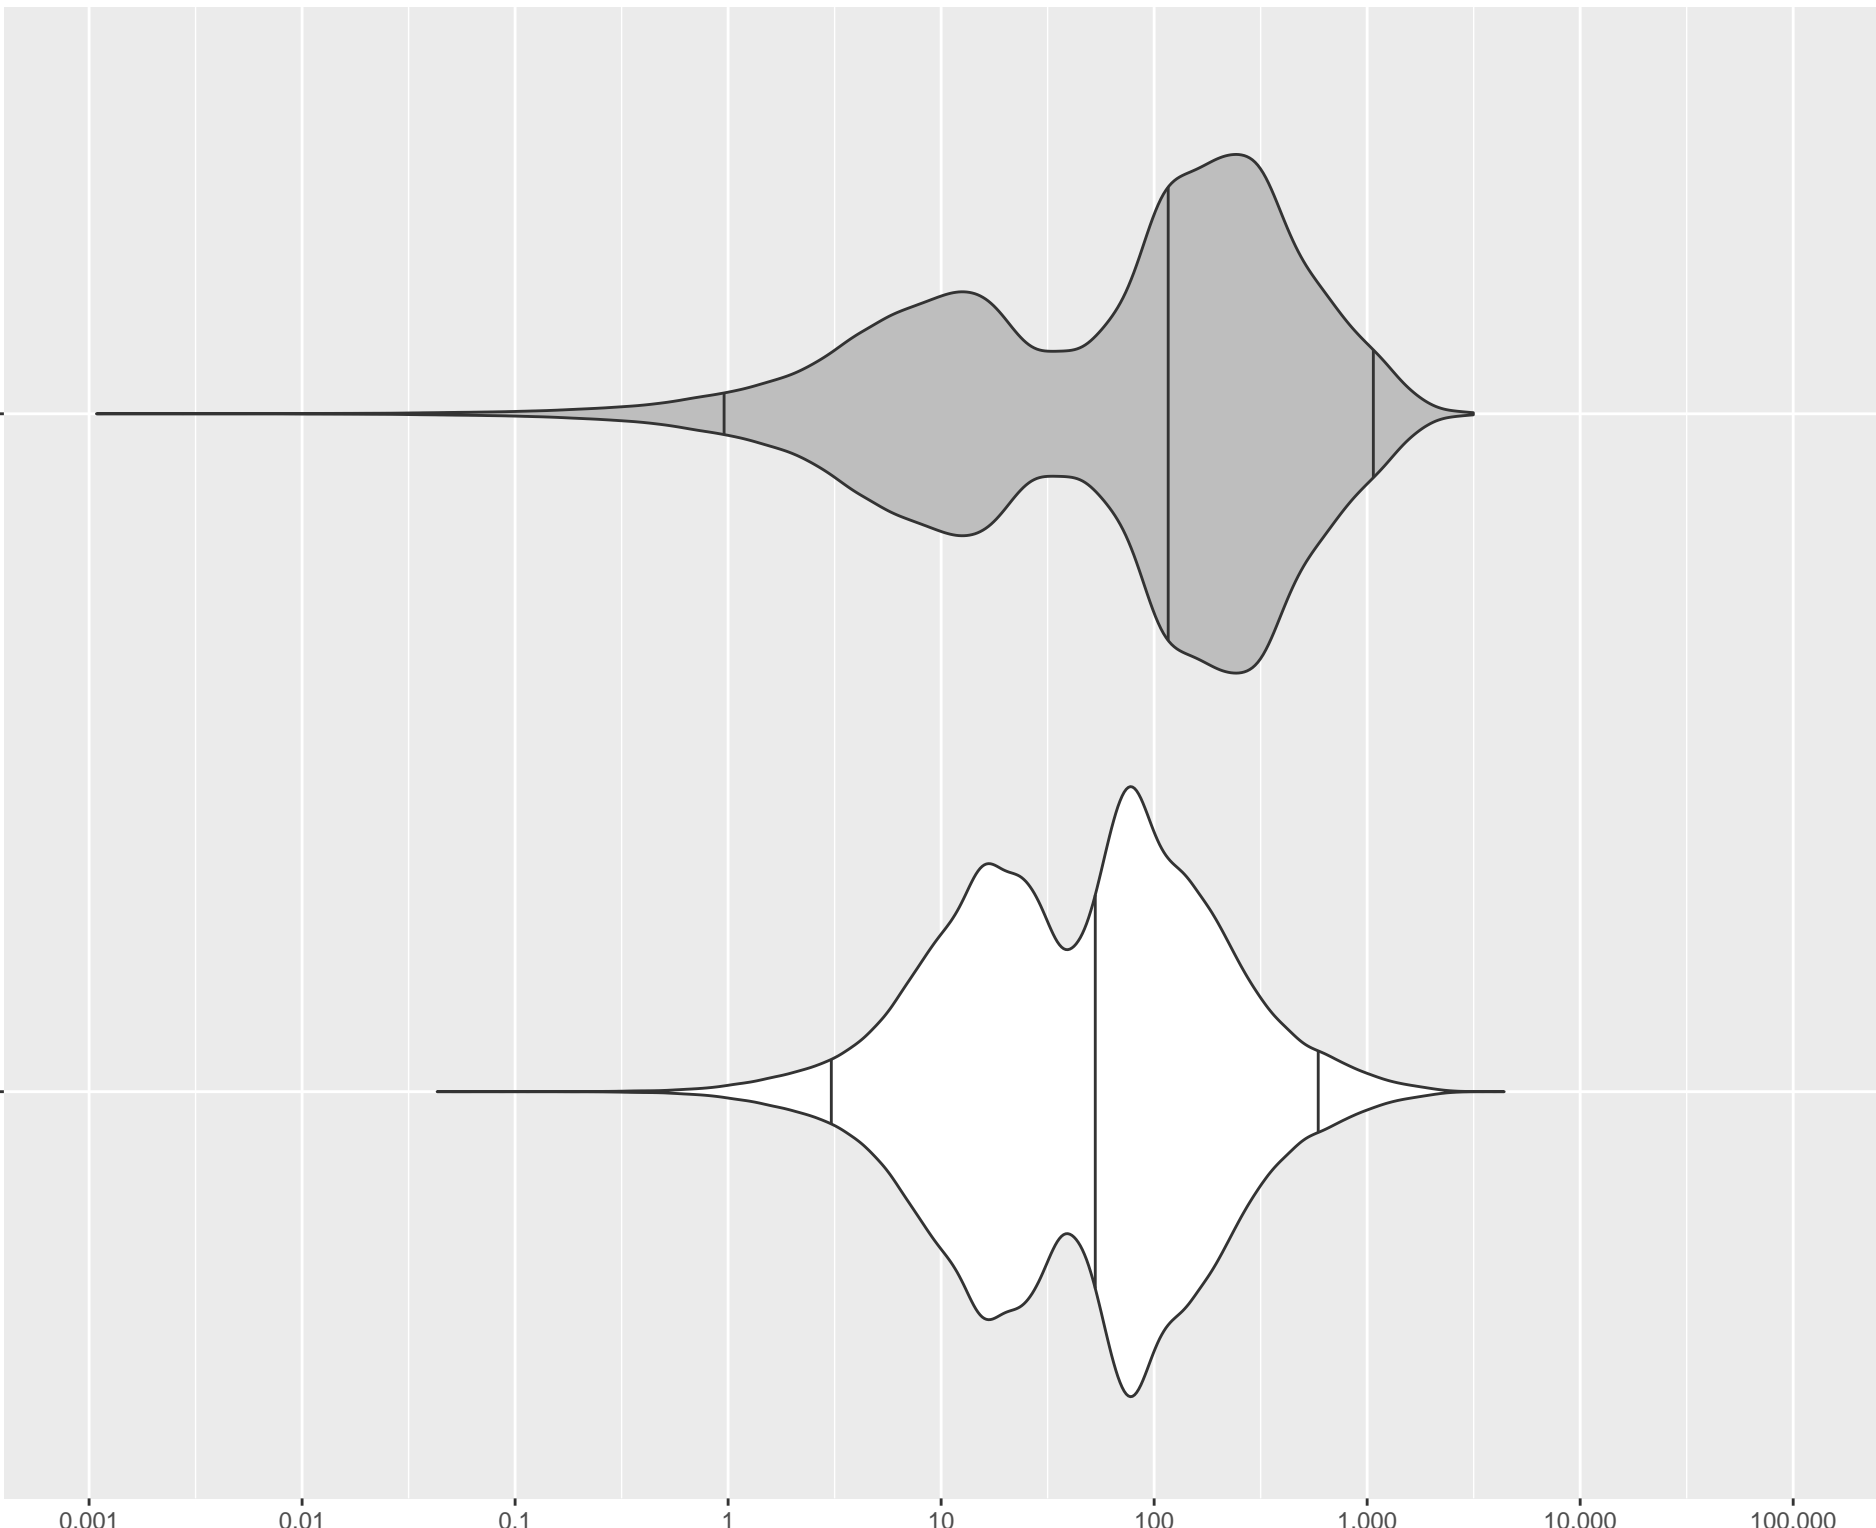

Abudefduf abdominalis

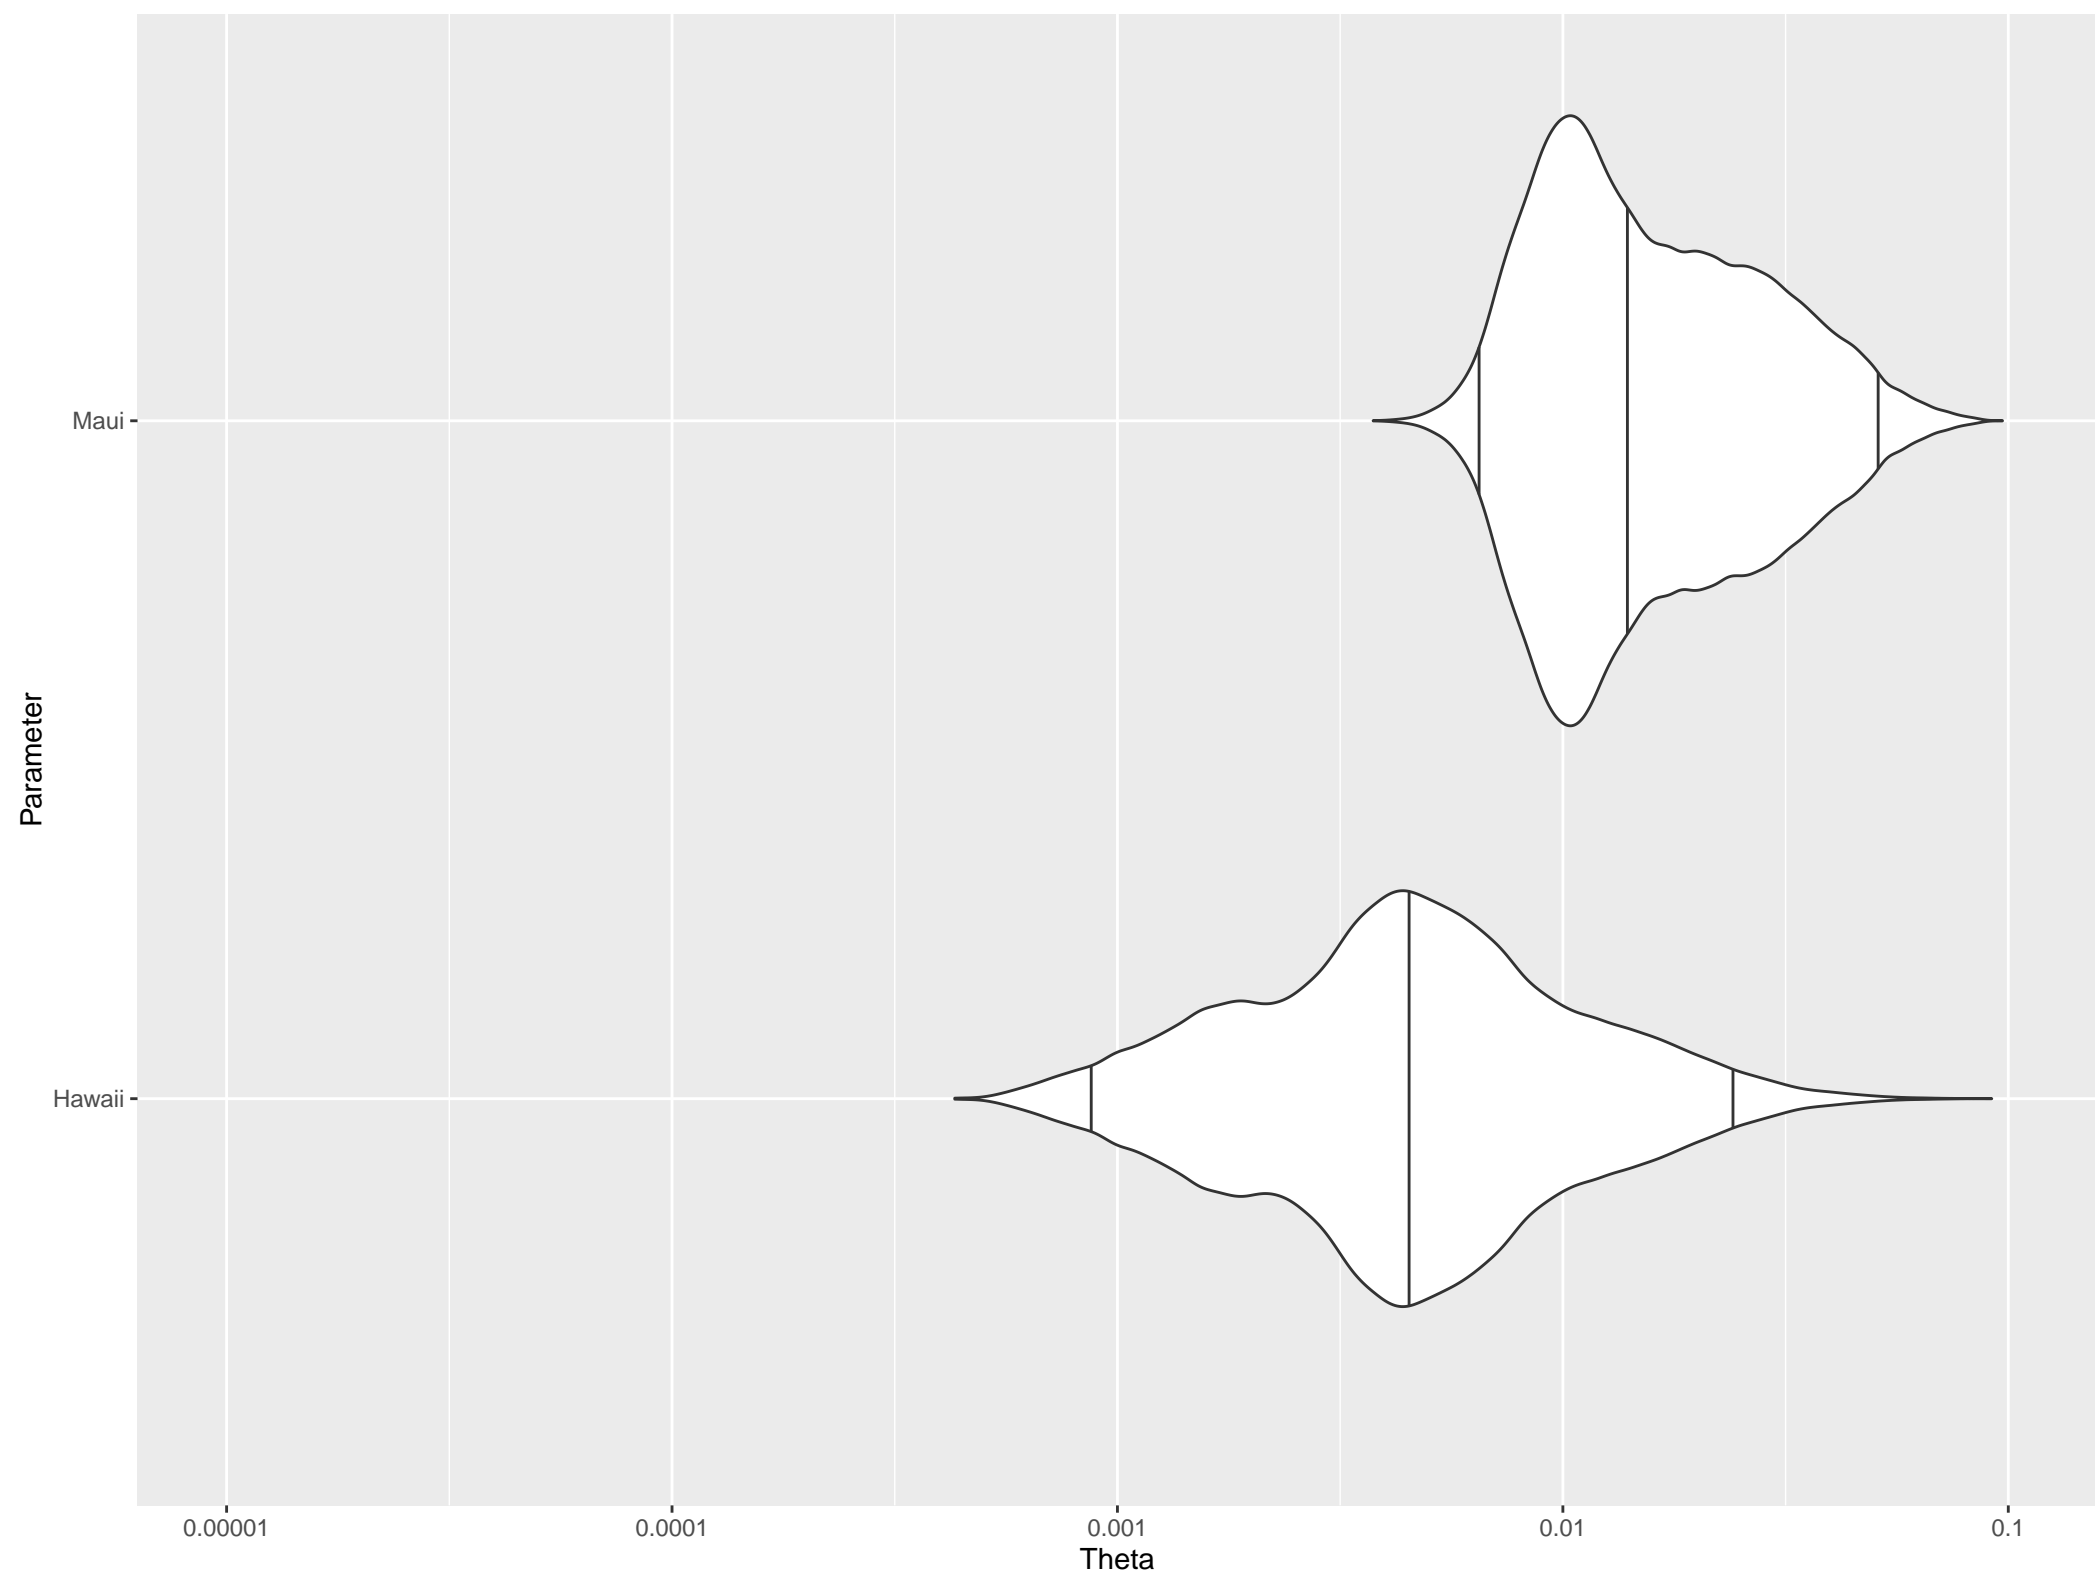

# Abudefduf vaiigiensis

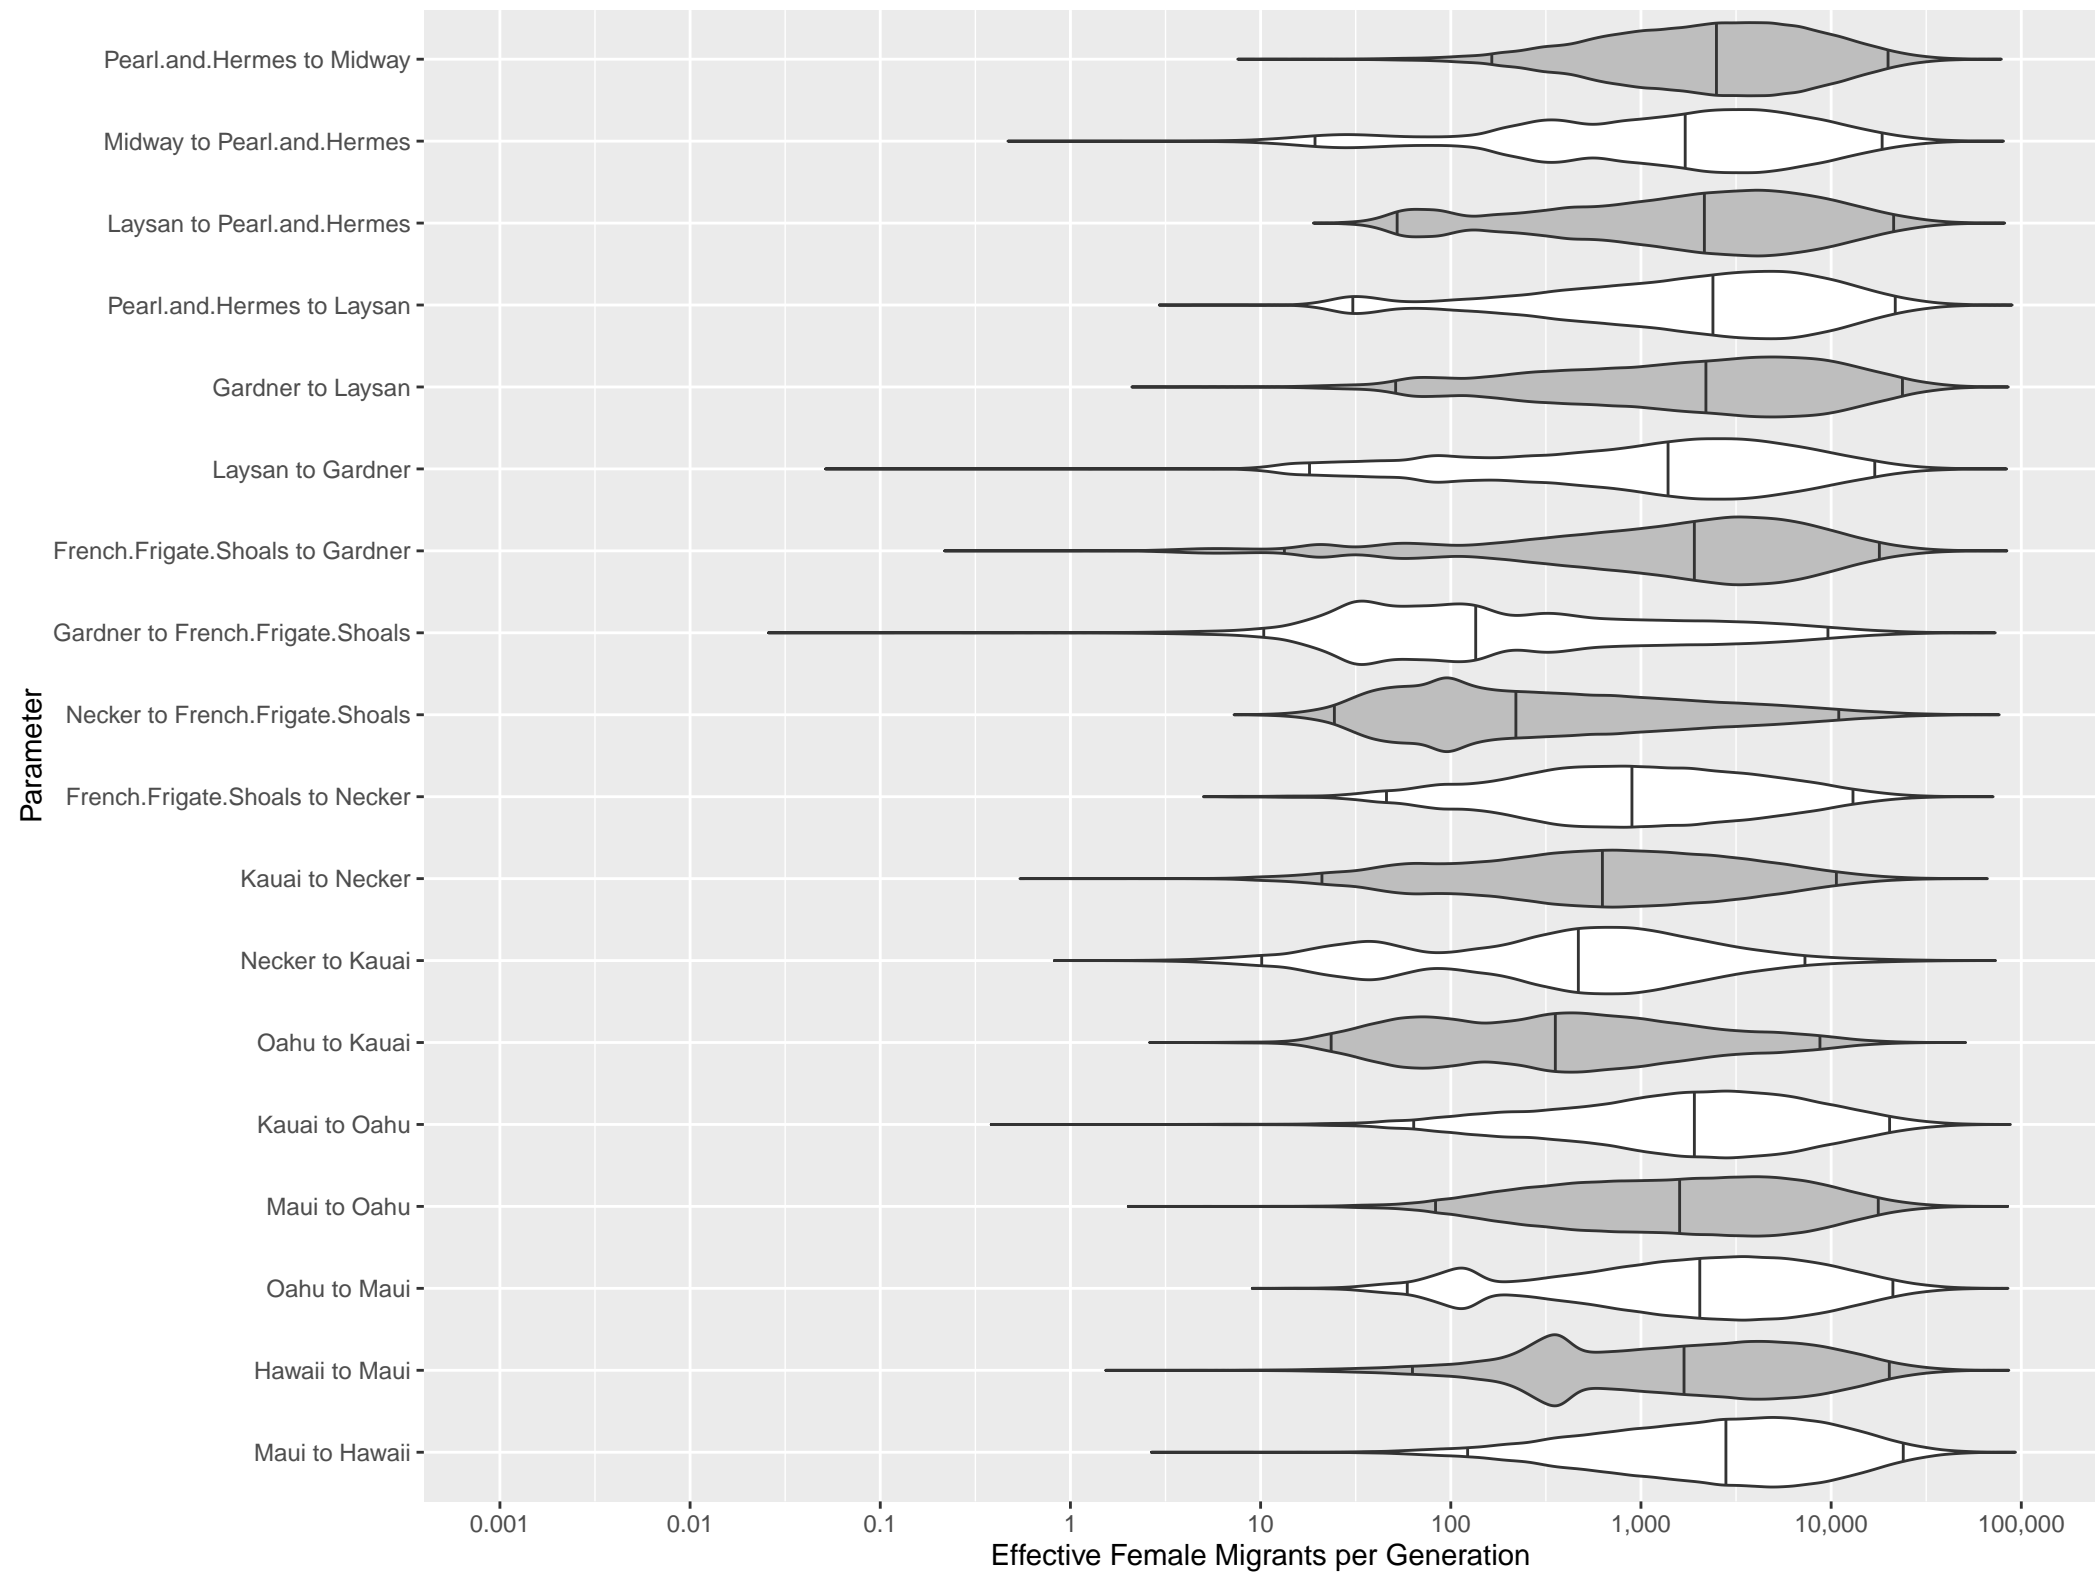

# Abudefduf vaiigiensis

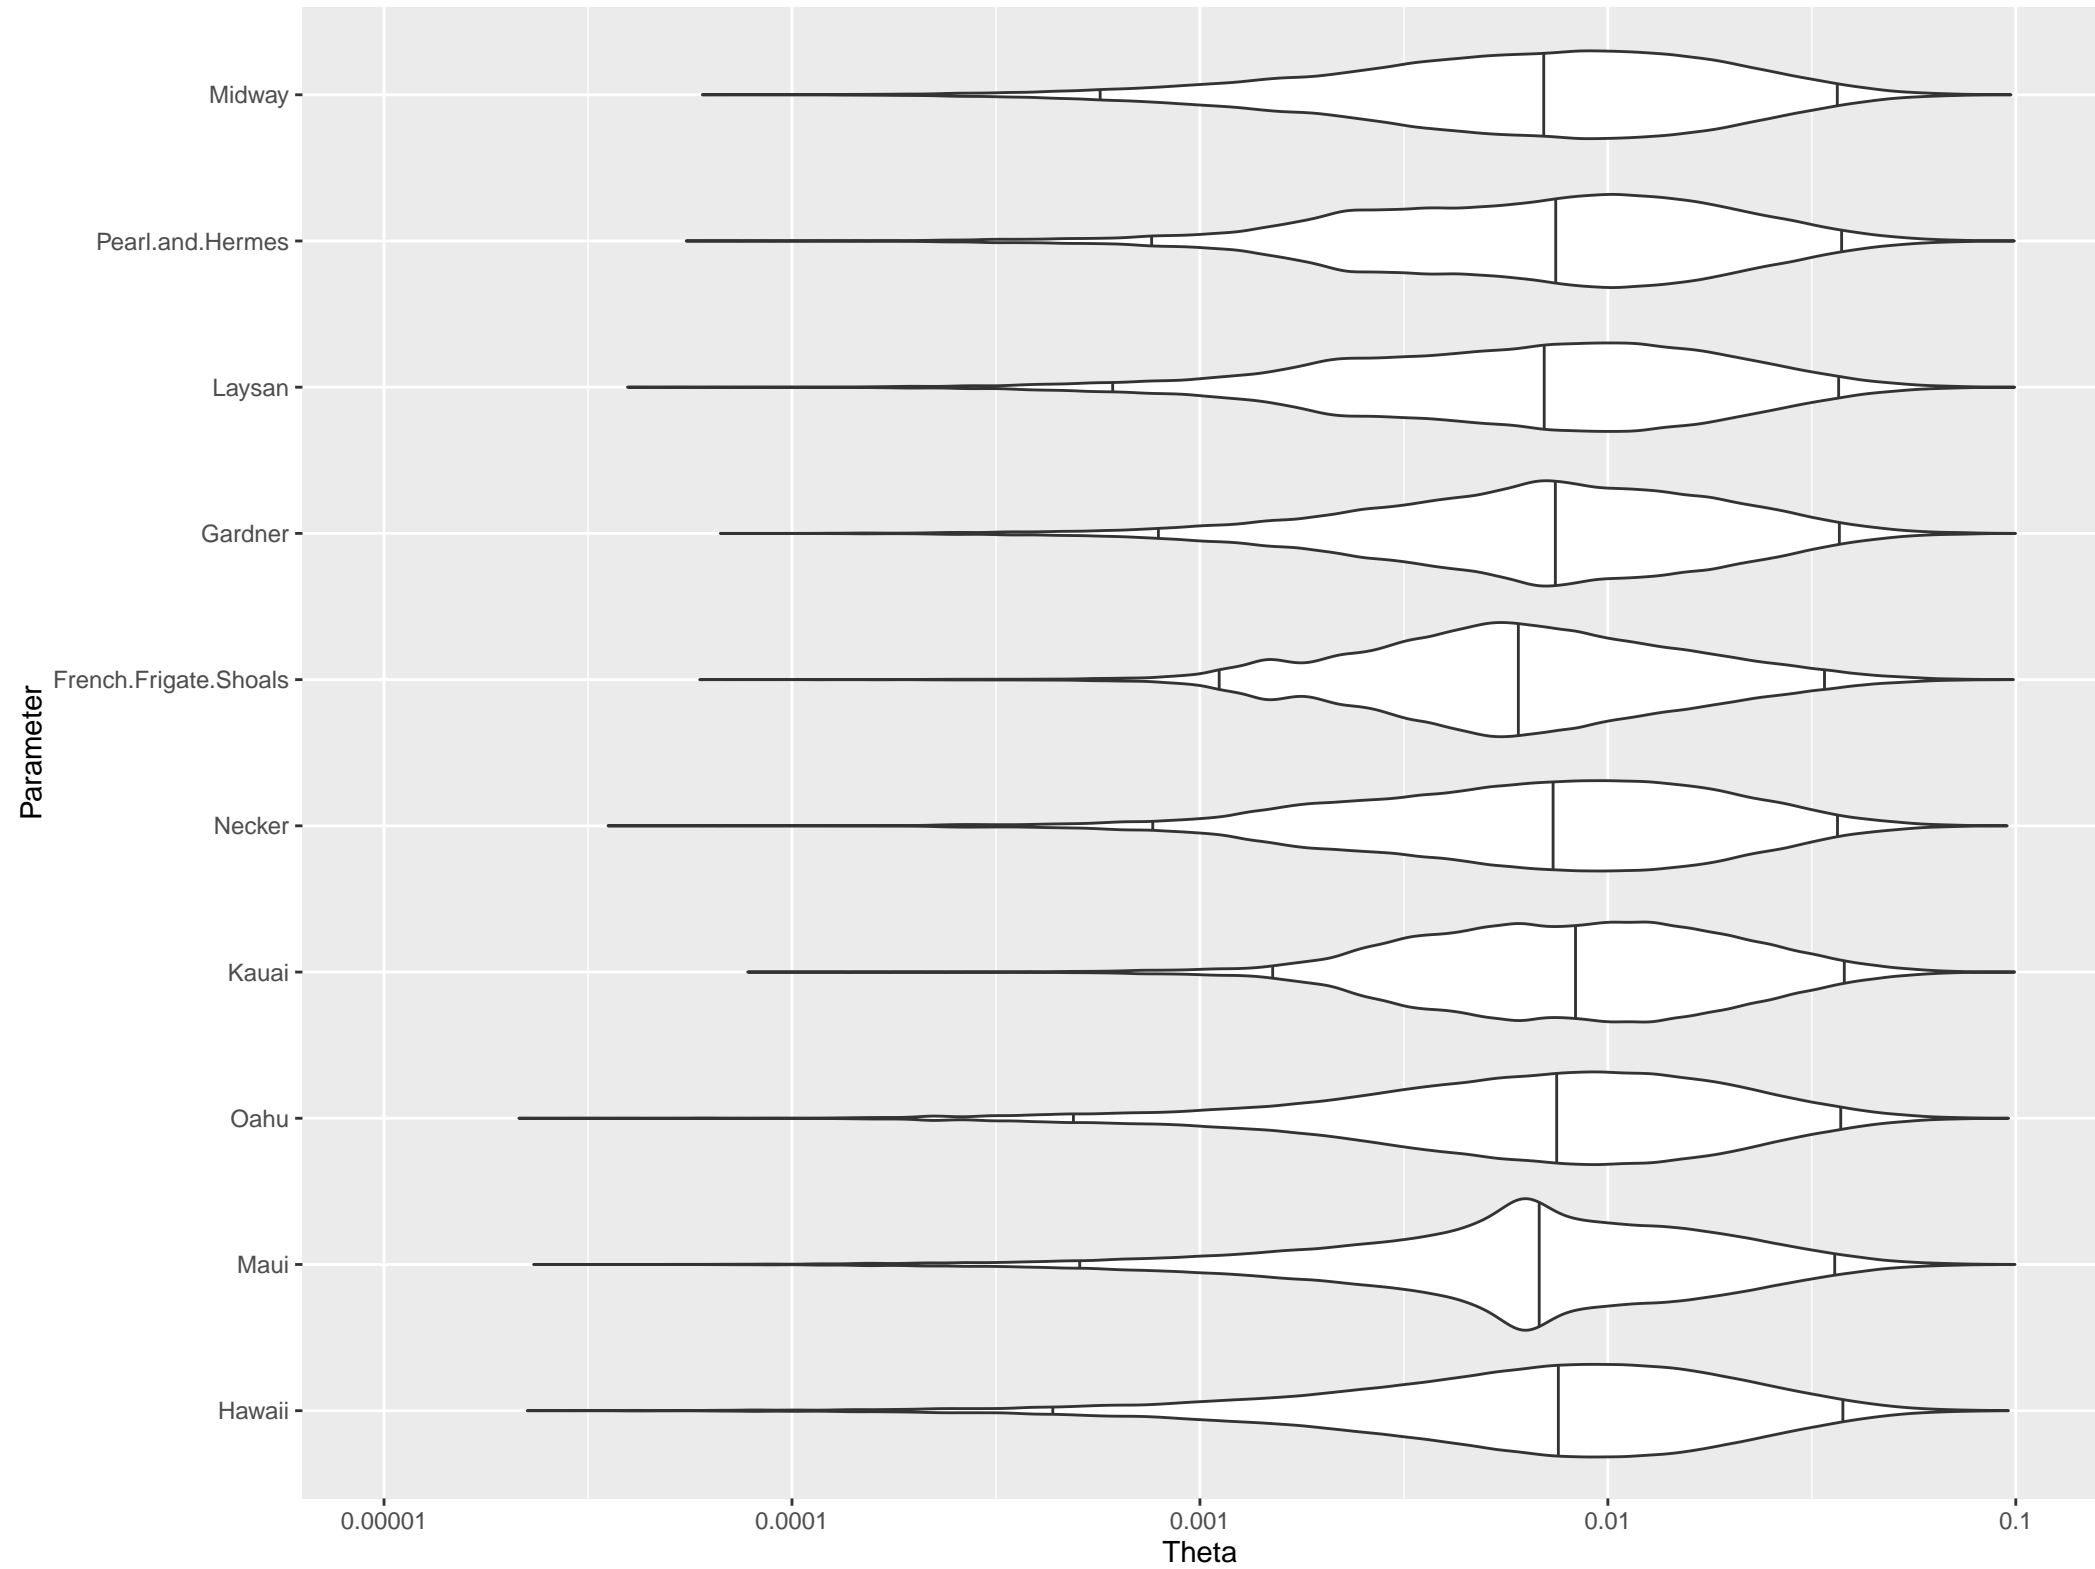

# Acanthurus nigroris

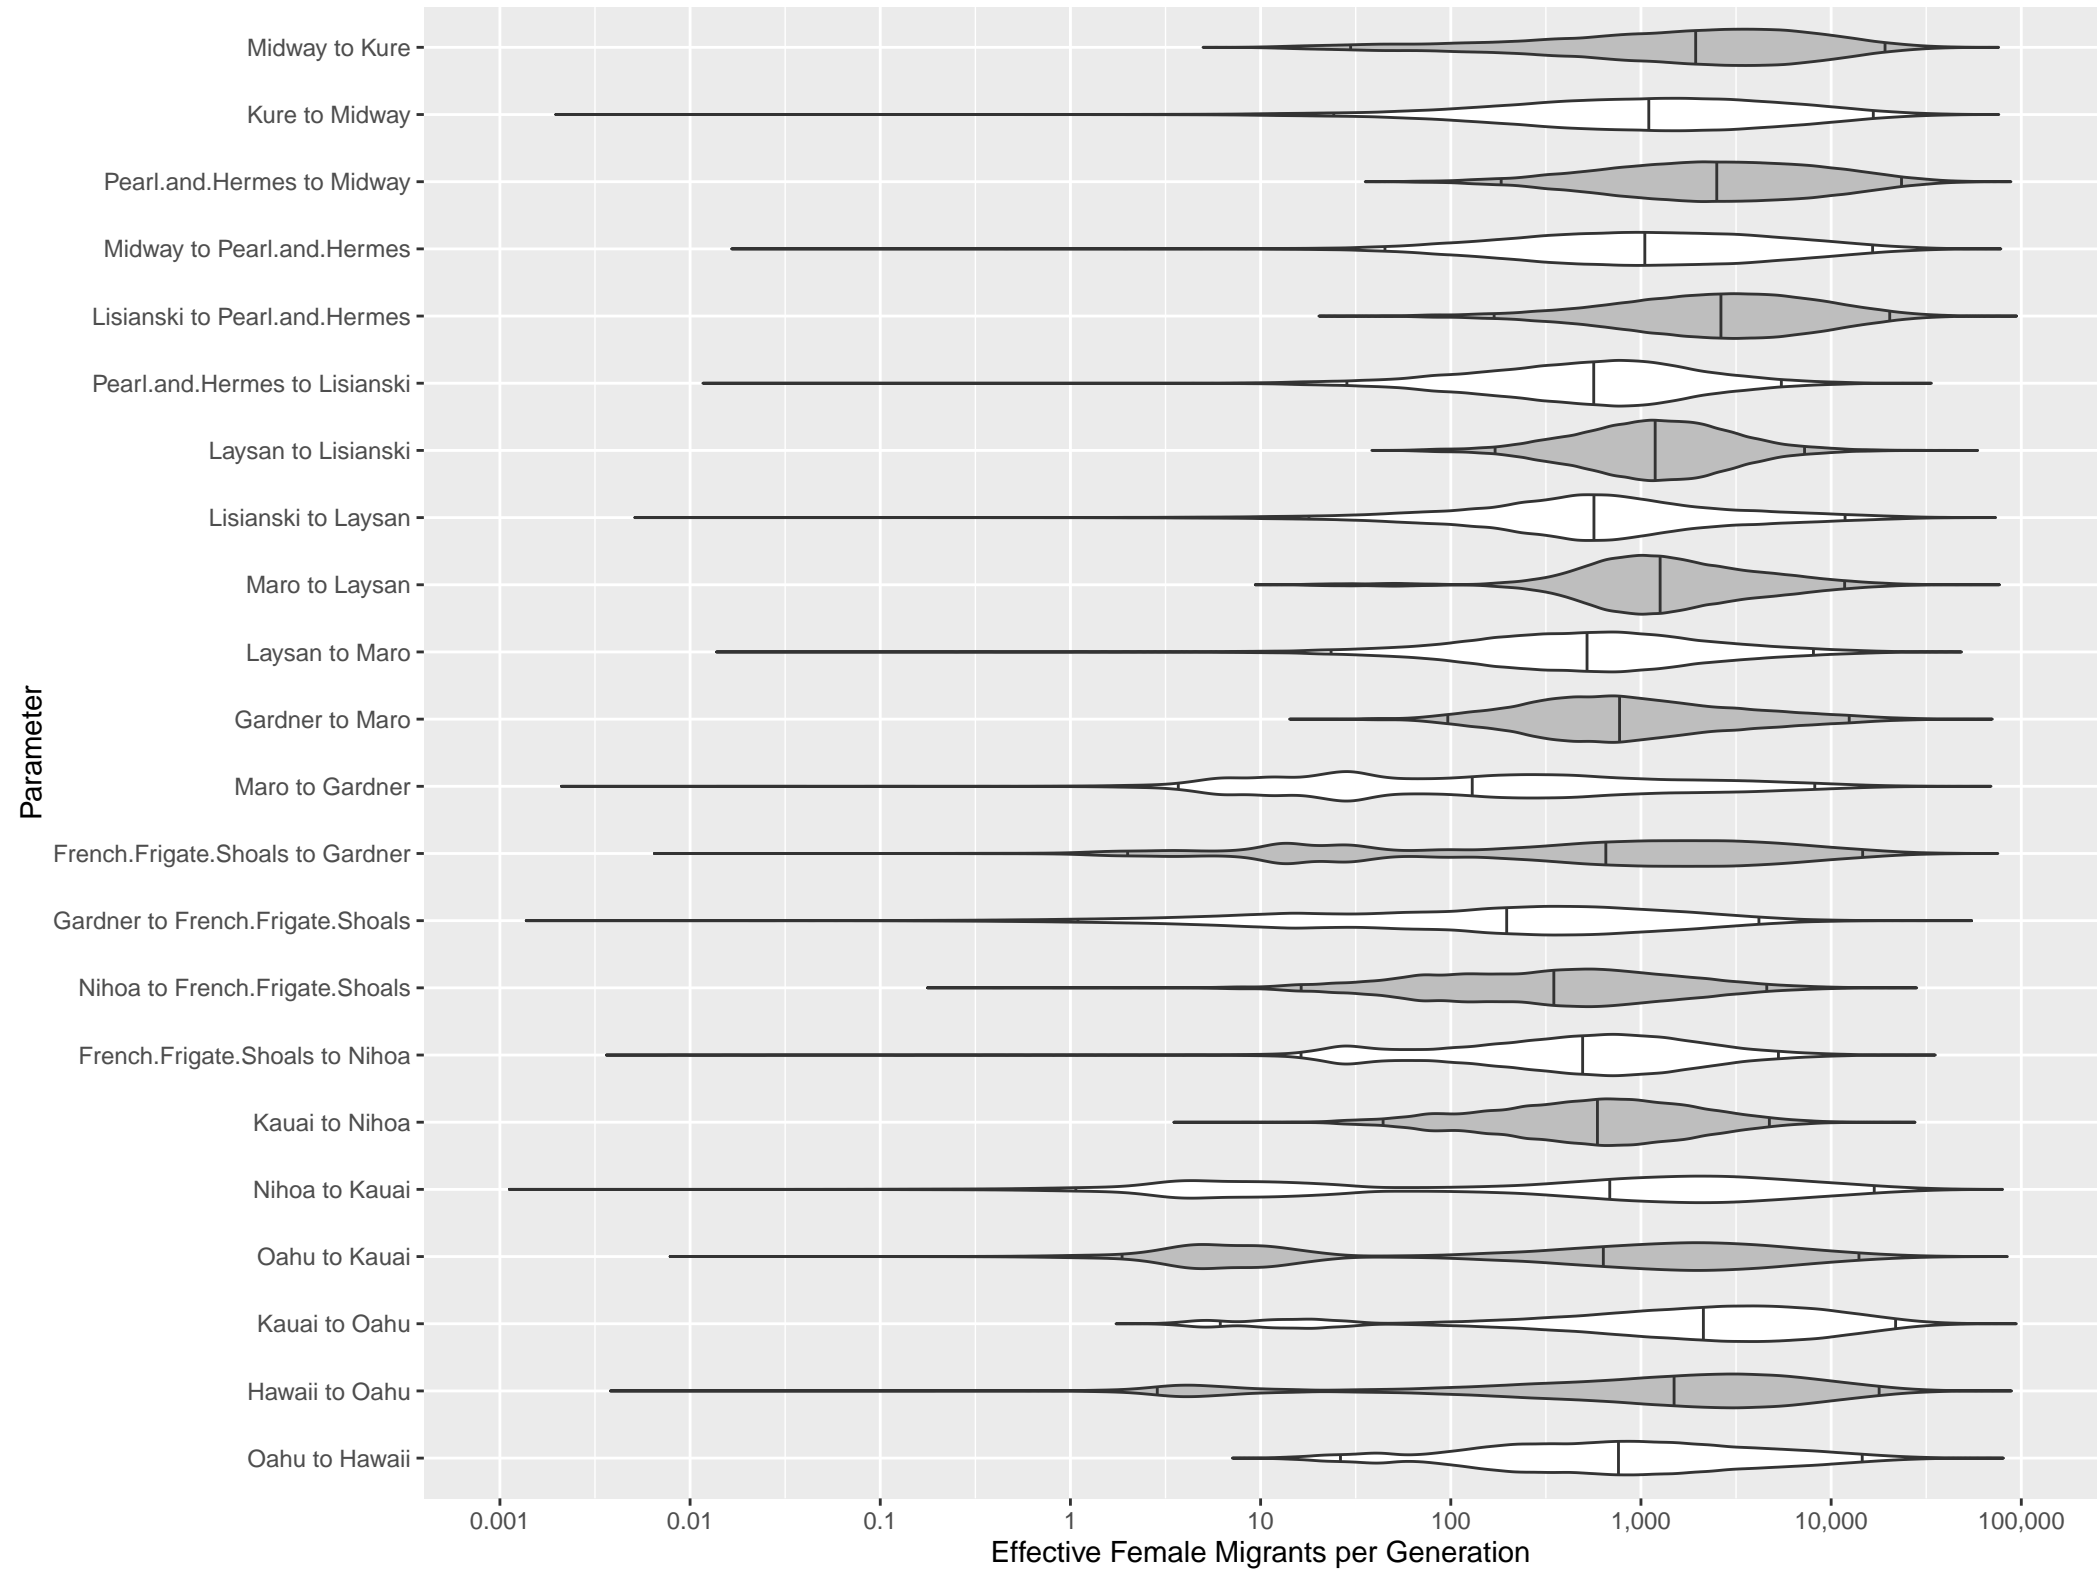

# Acanthurus nigroris

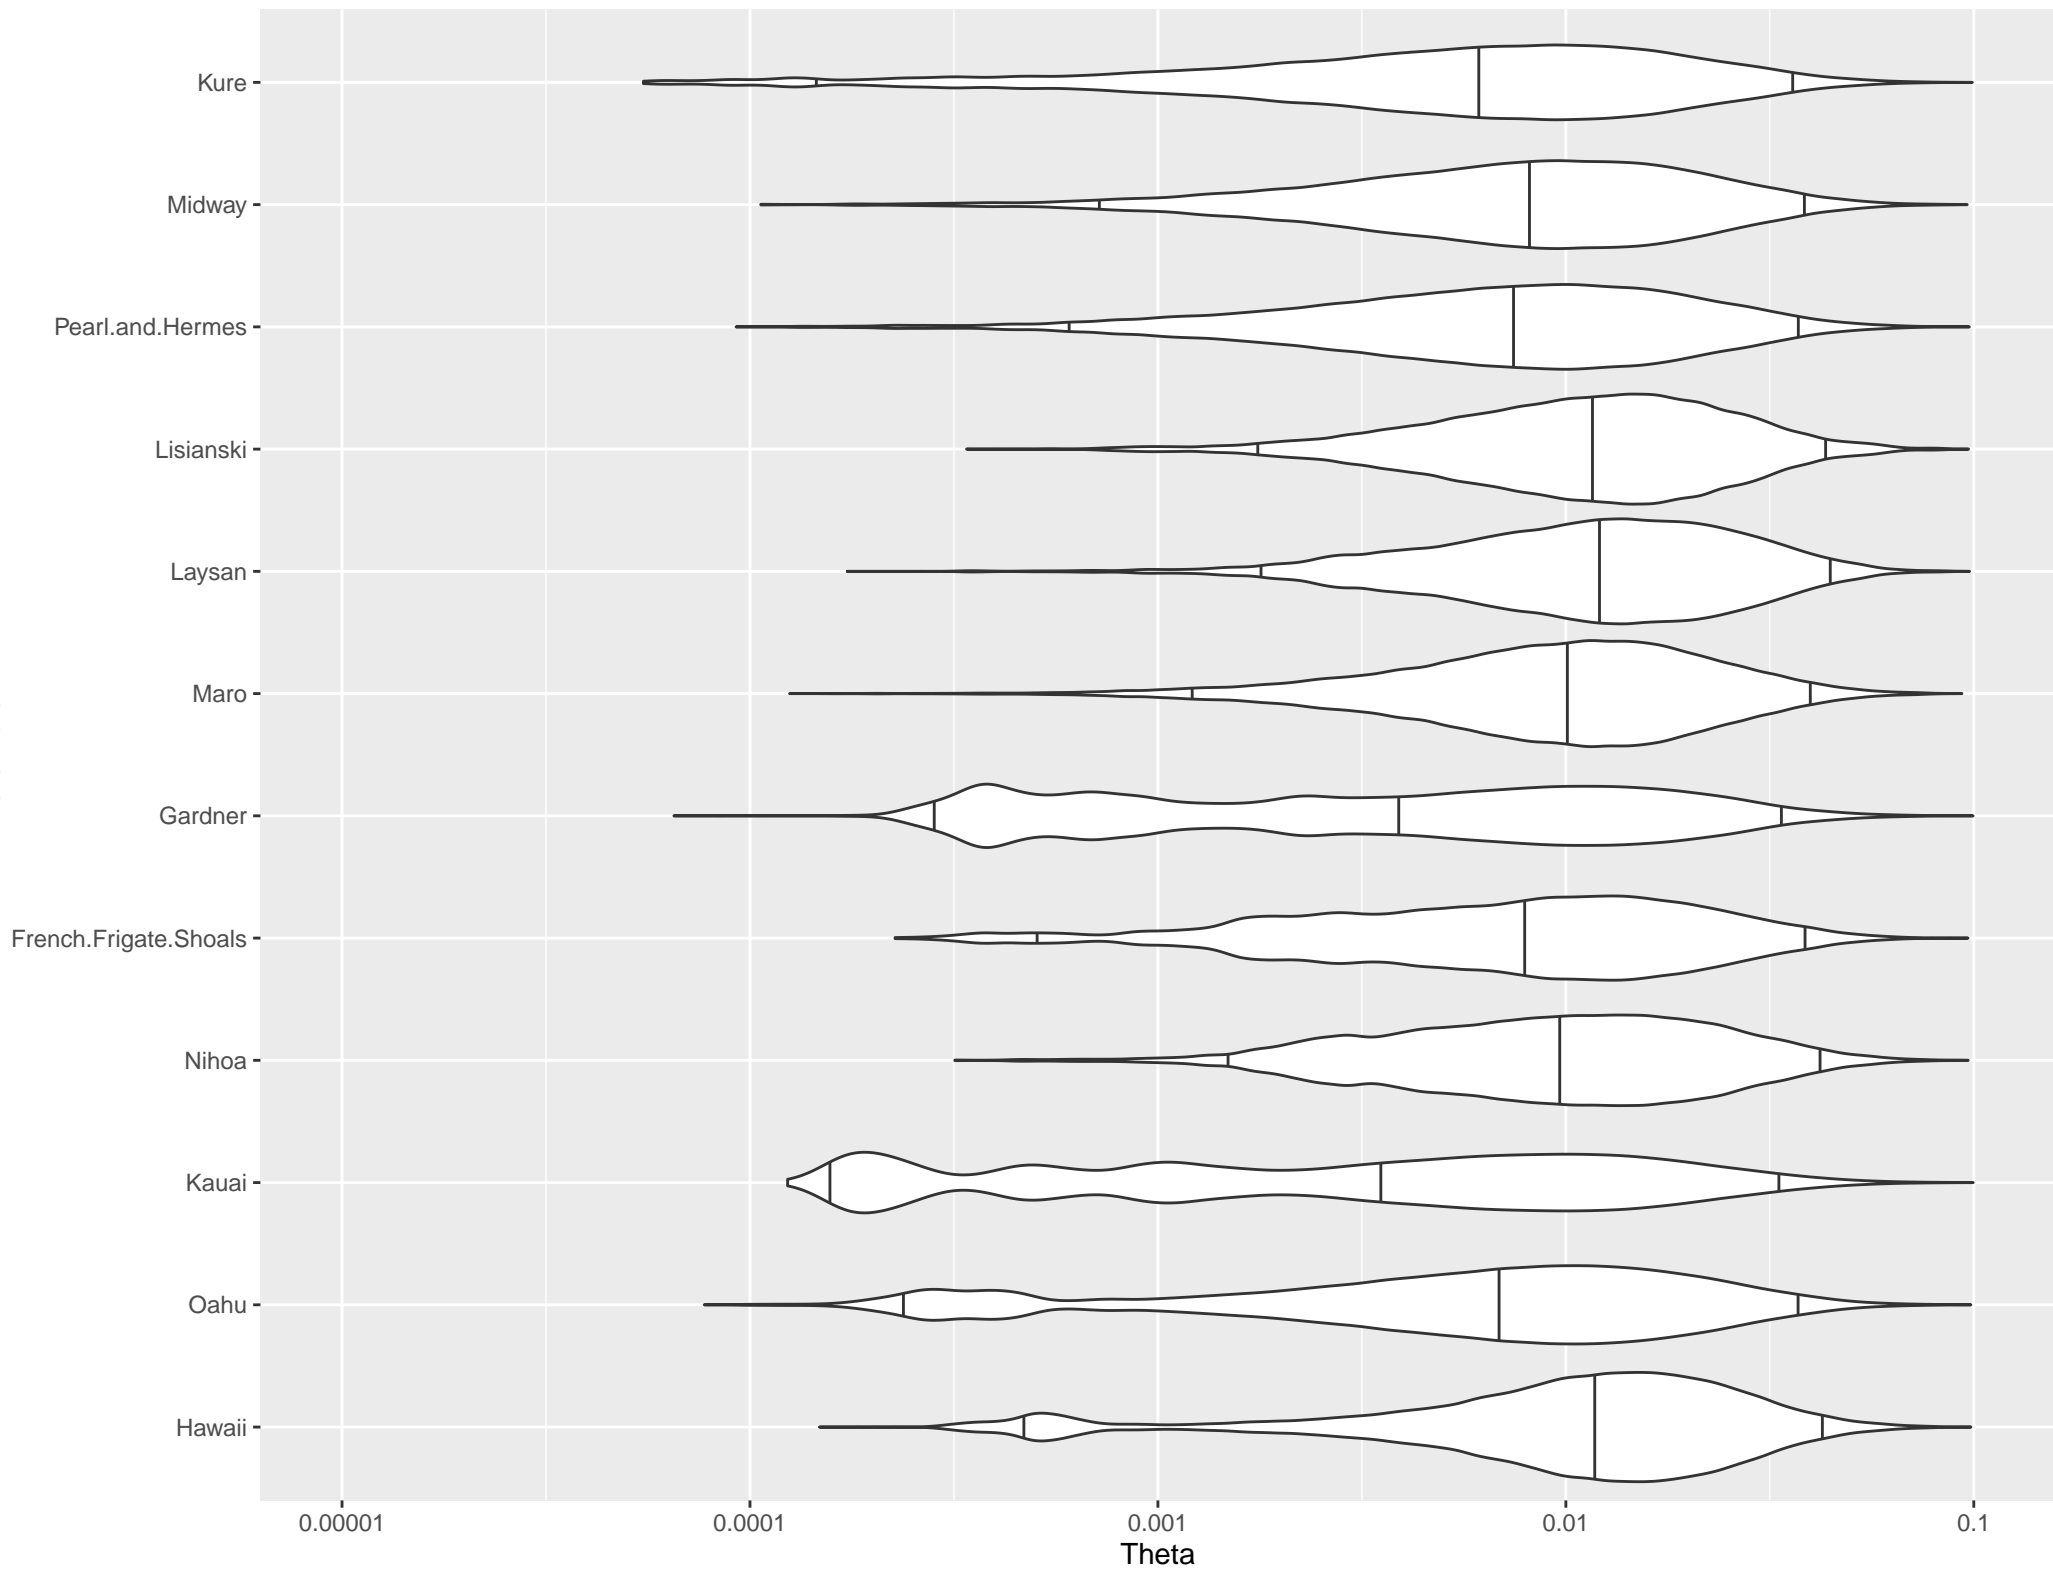

# Acanthurus olivaceus

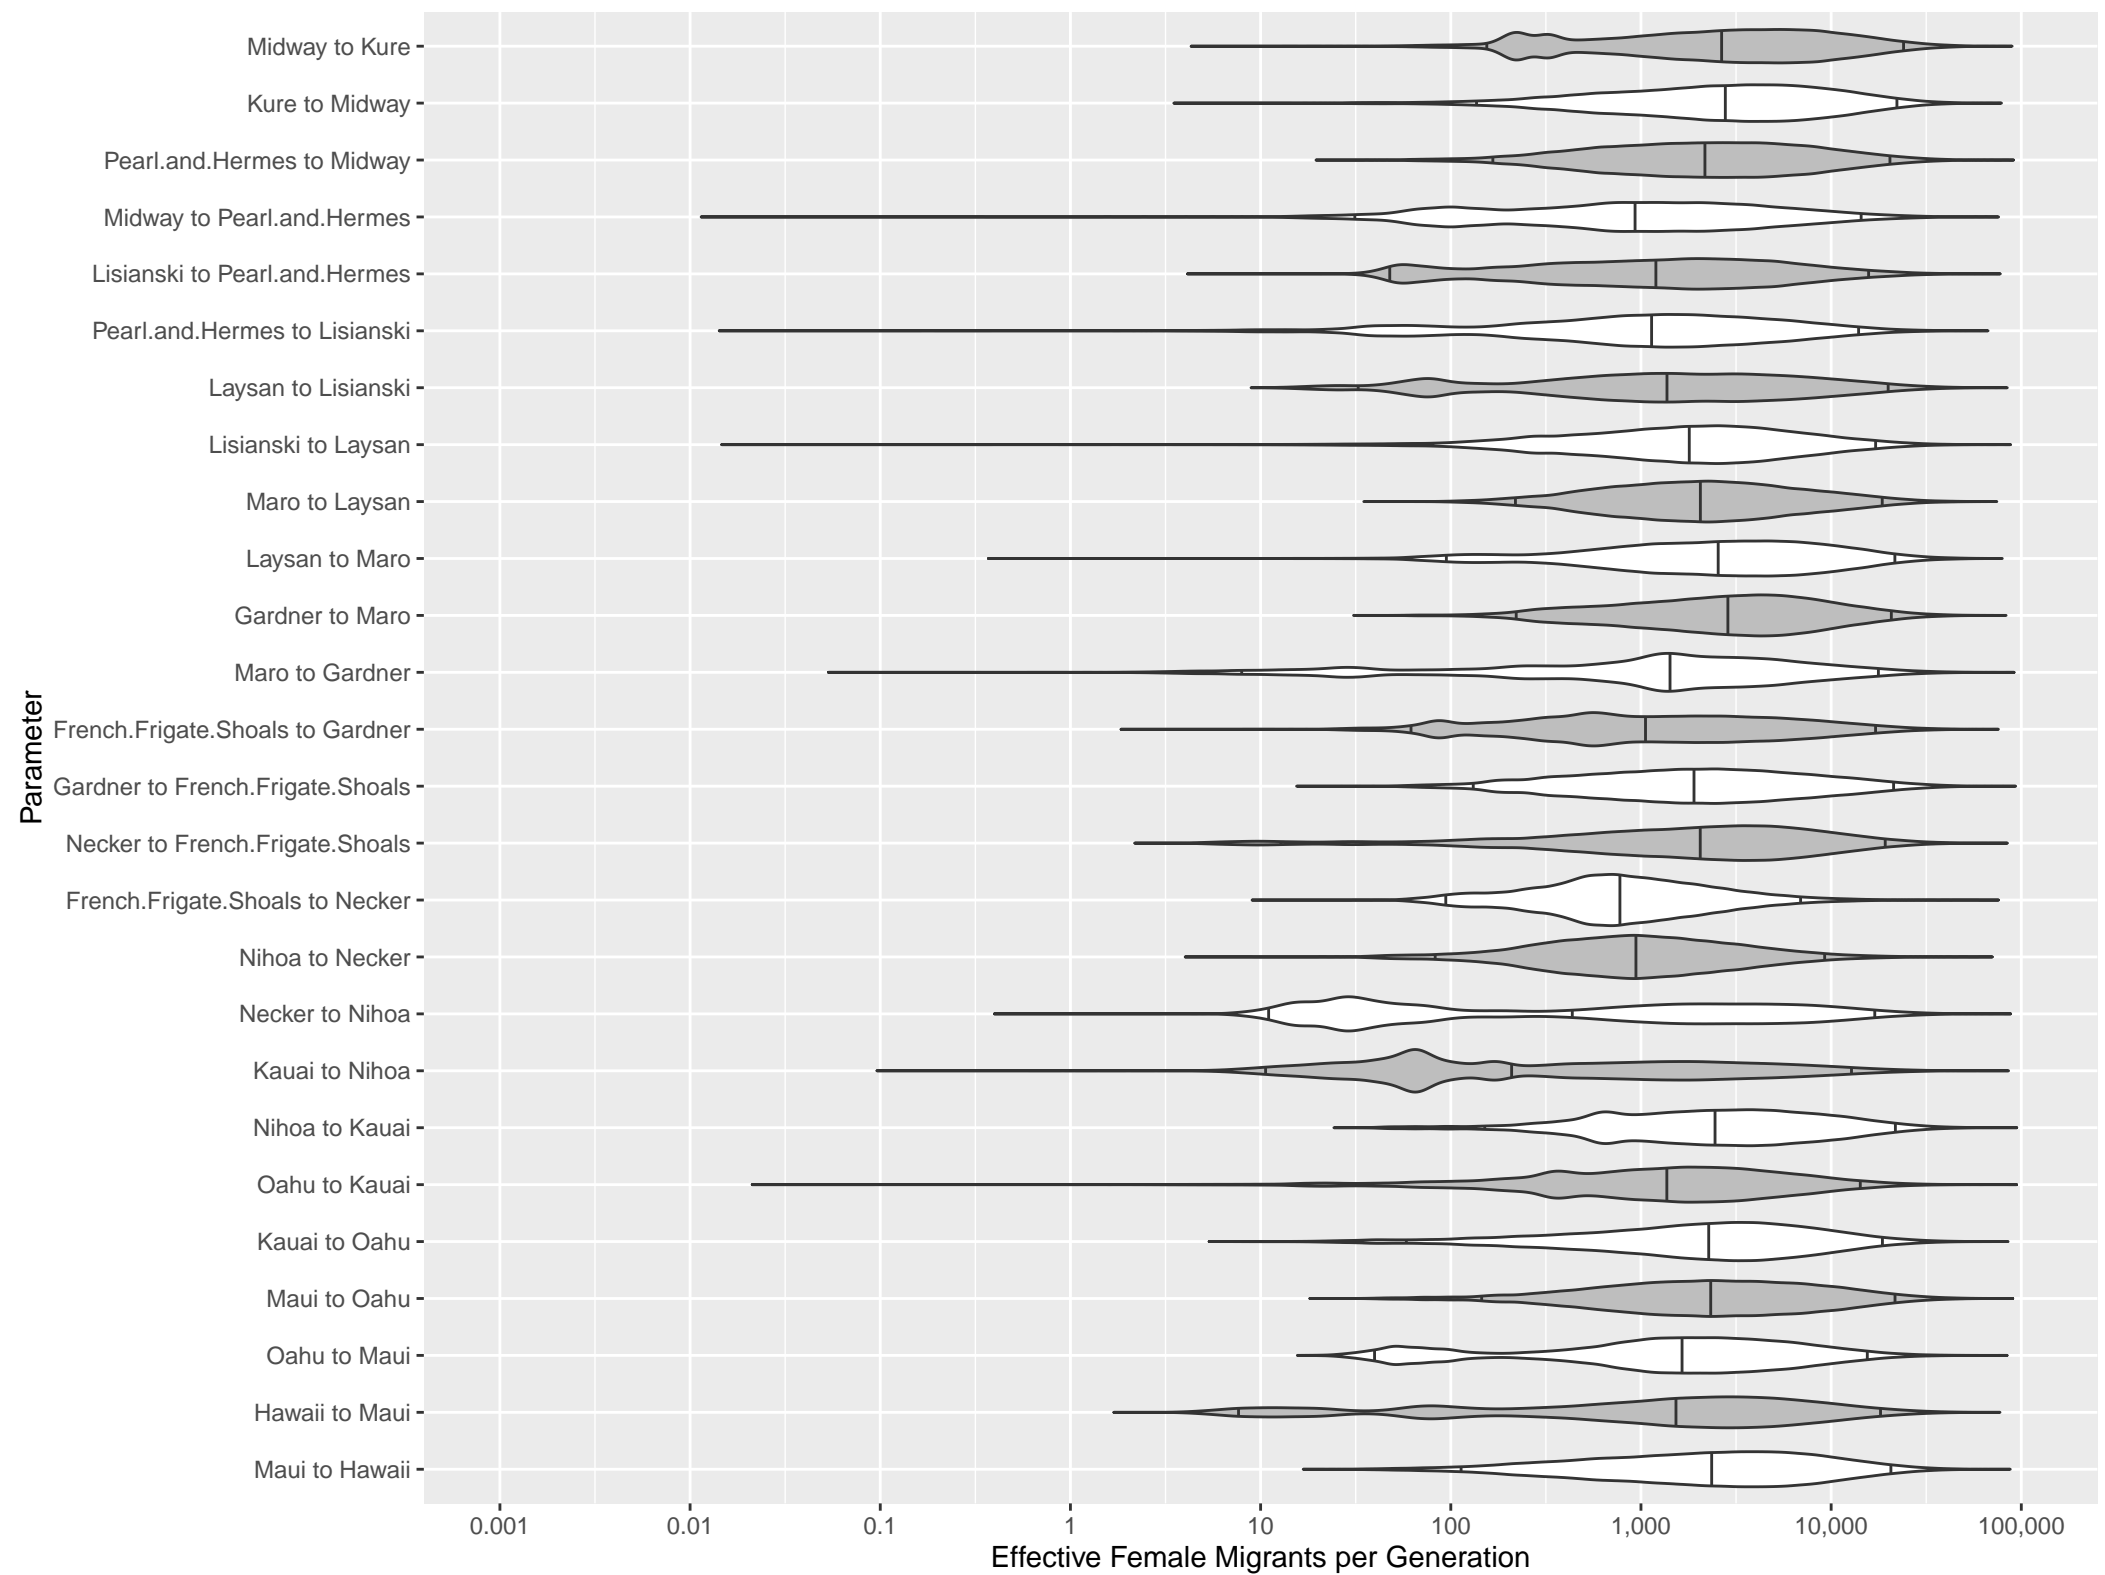

# Acanthurus olivaceus

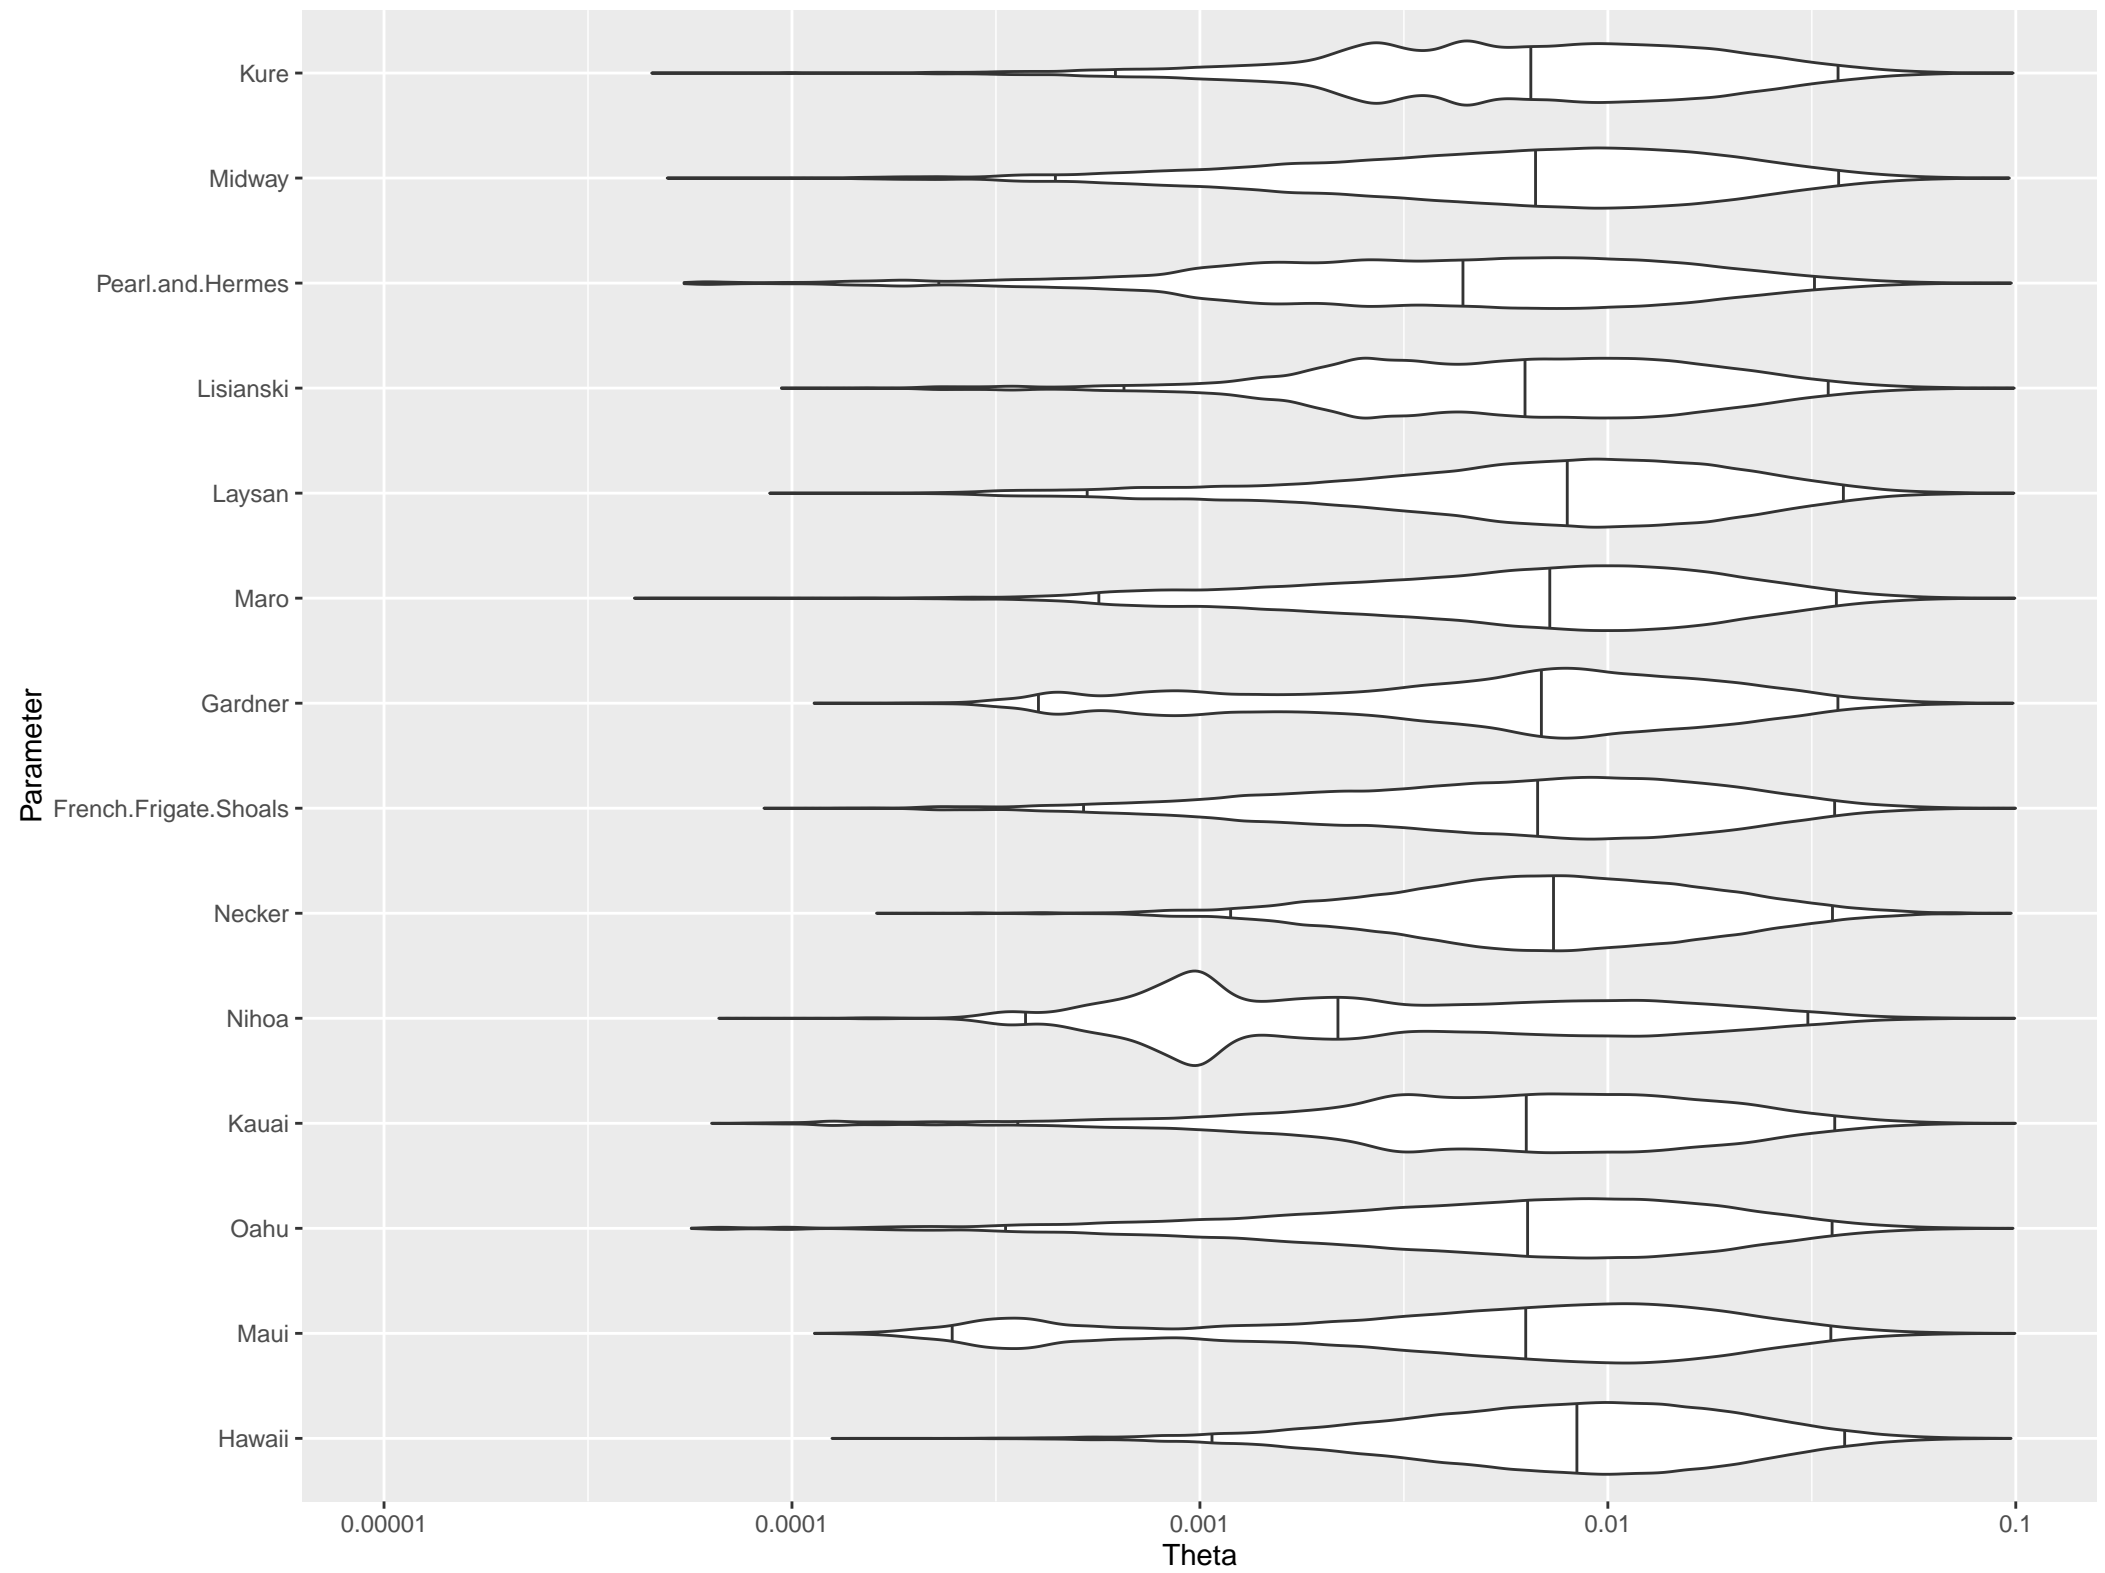



# Calcinus hazletti

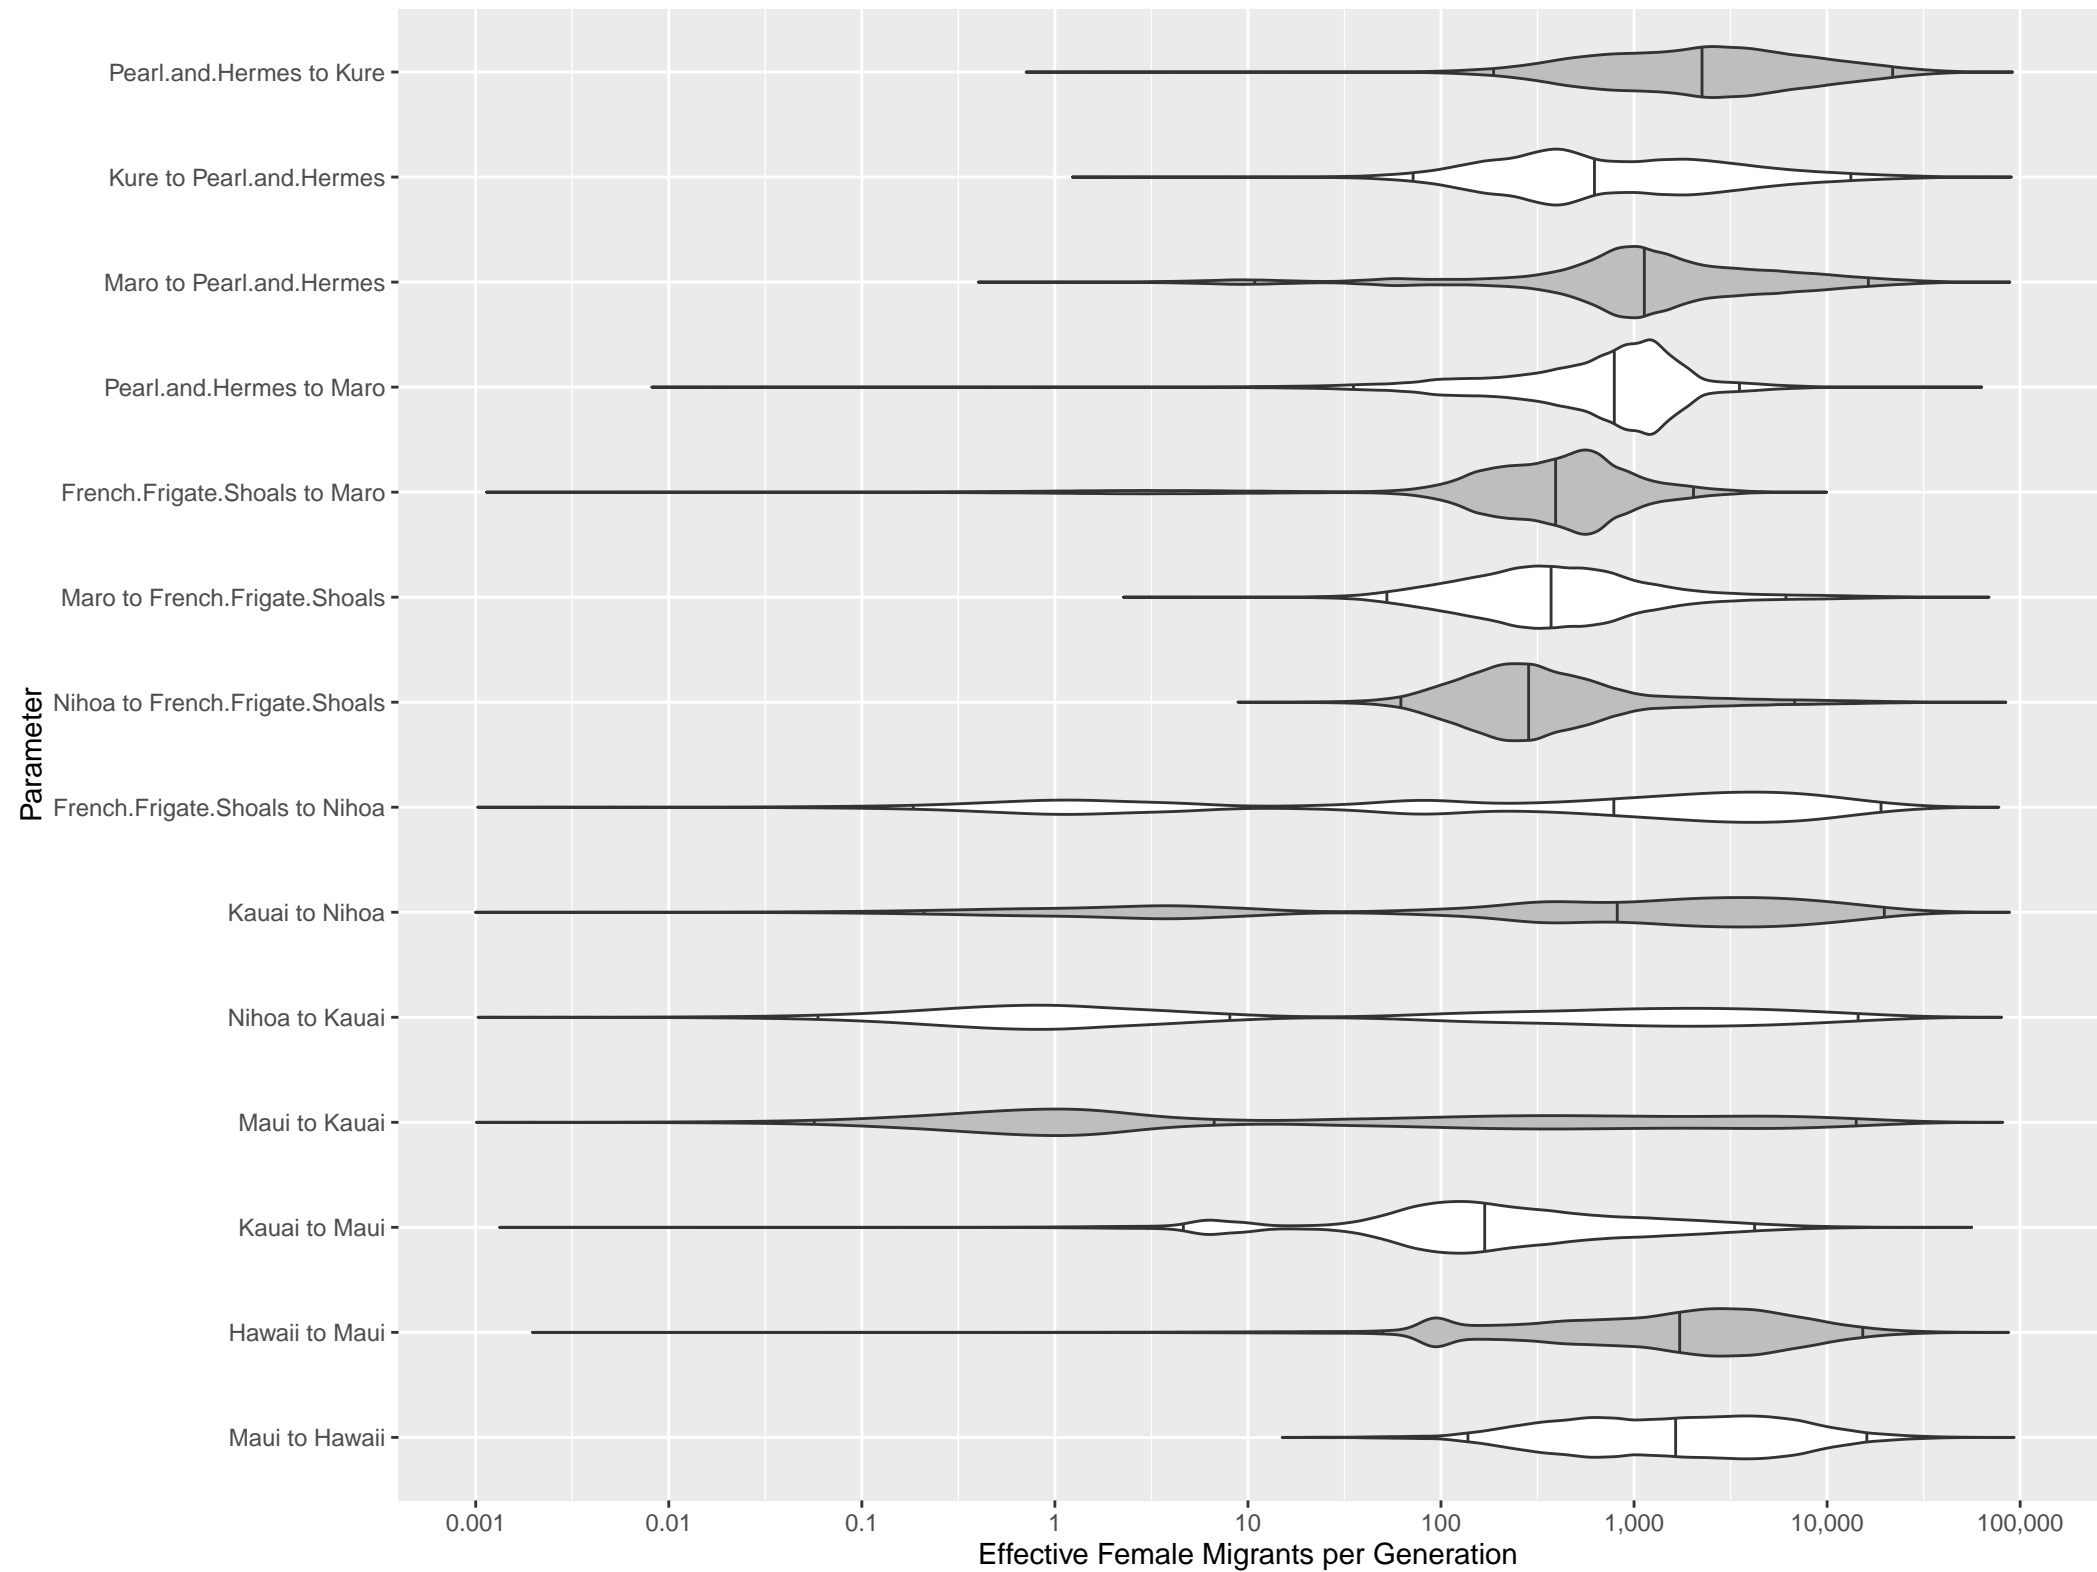

# Calcinus hazletti

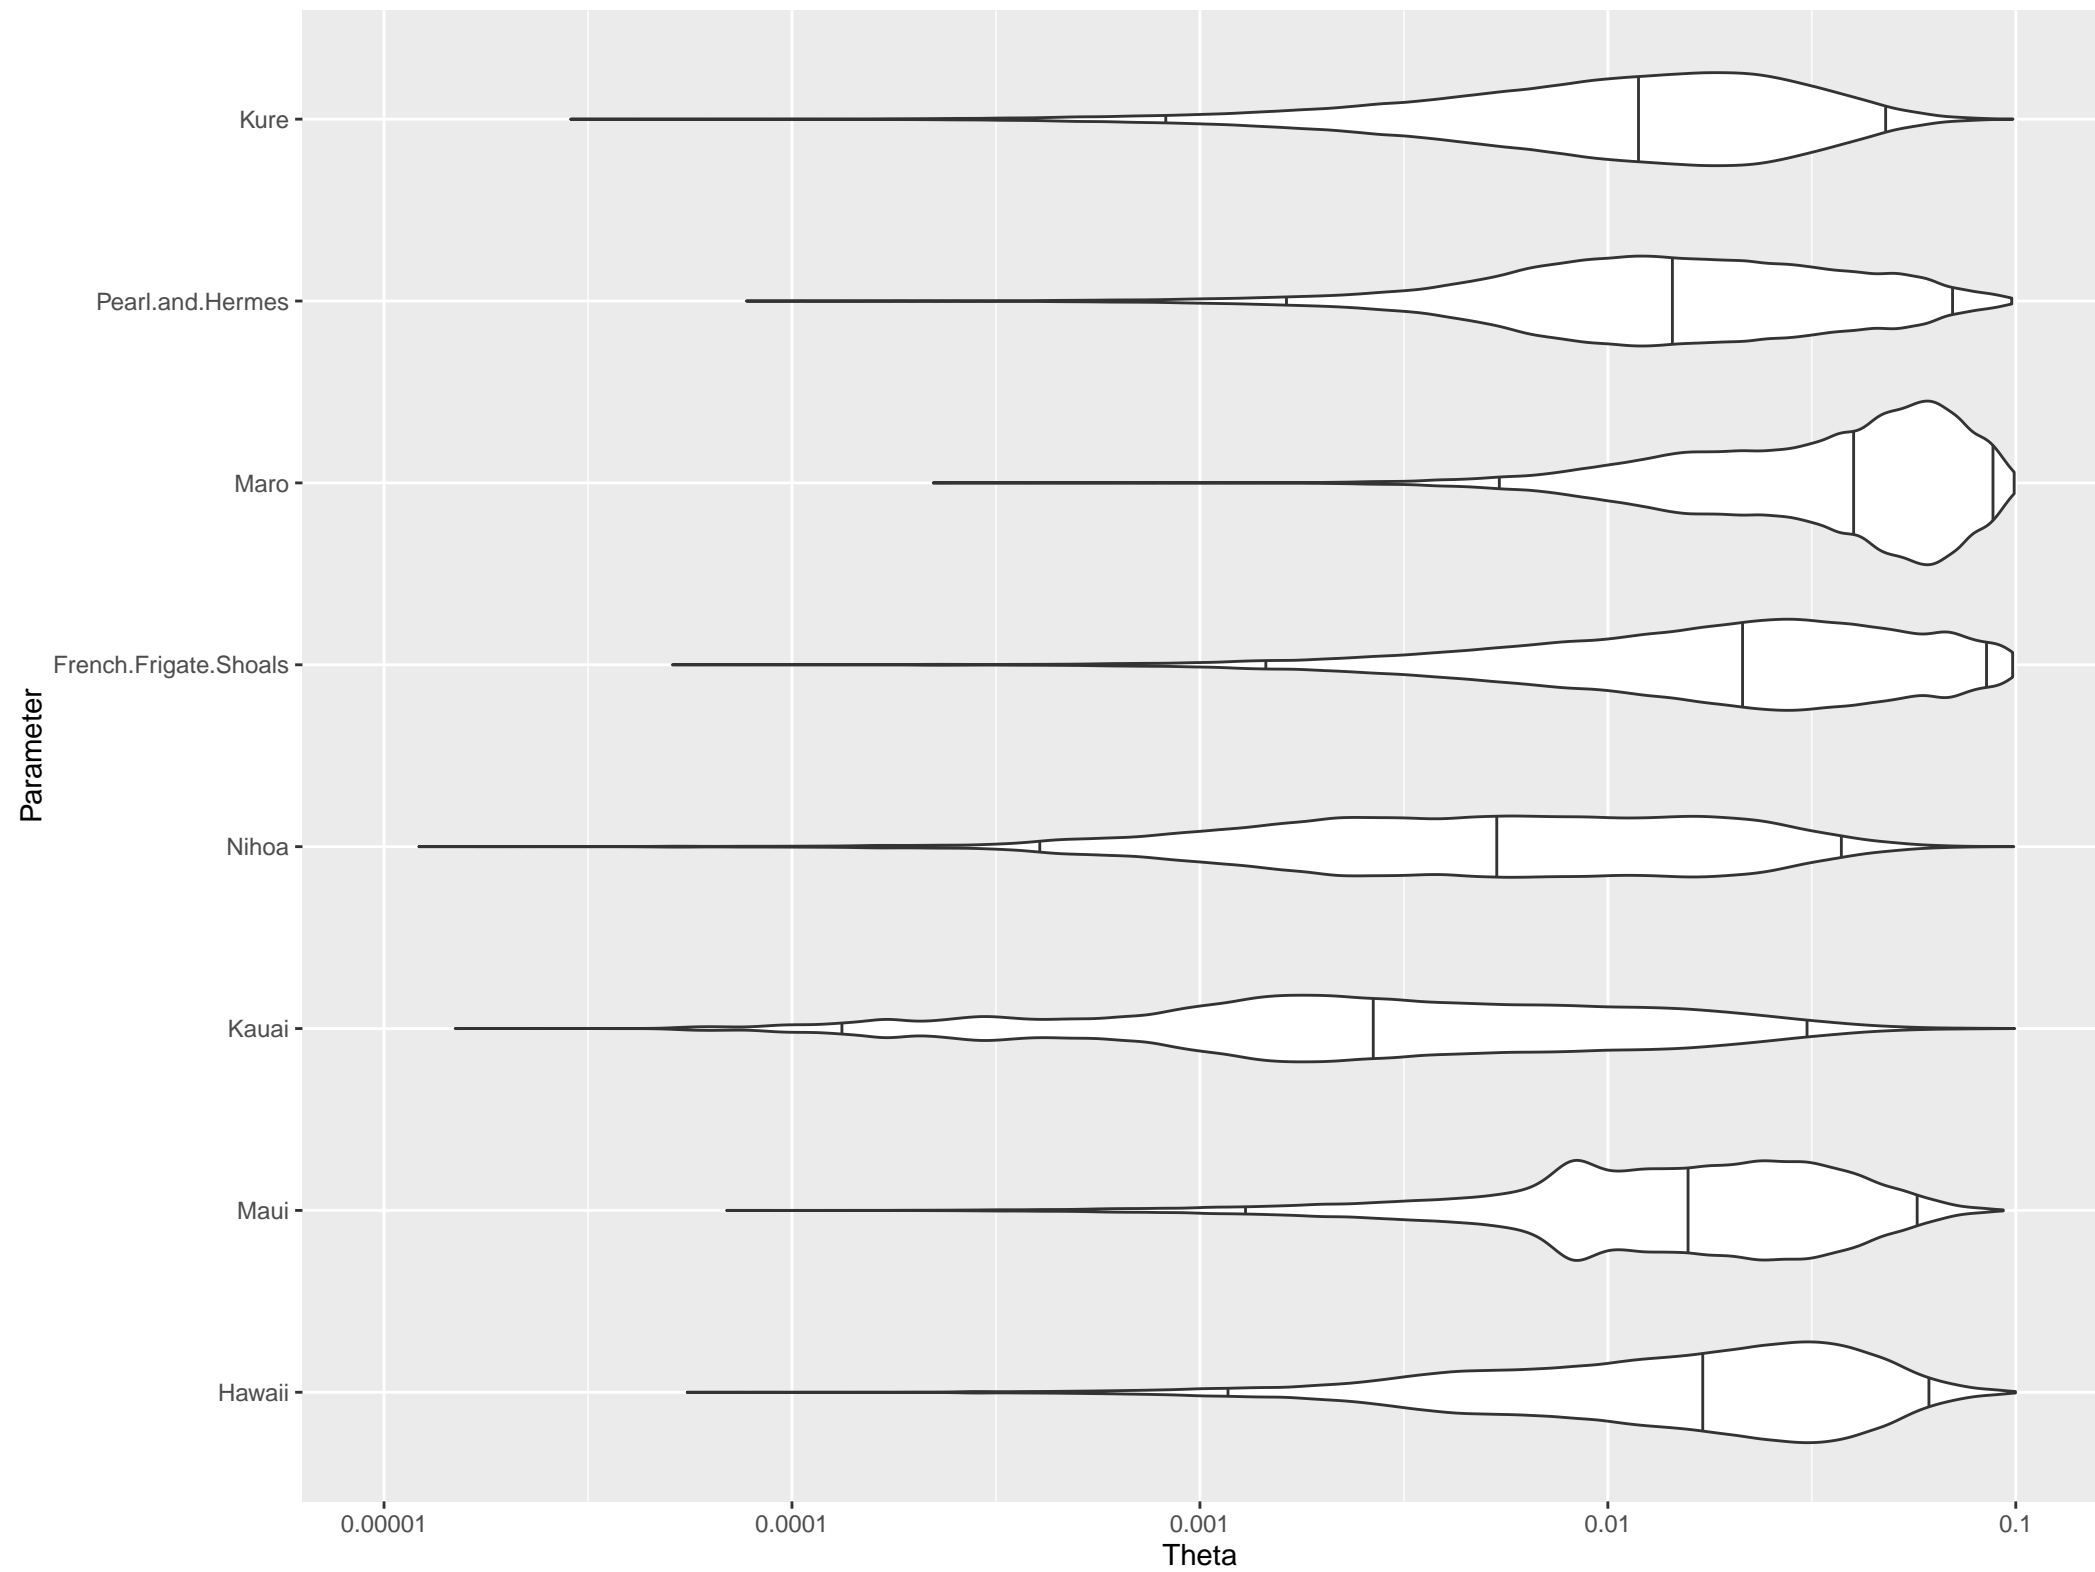

# Caranx melampygyus

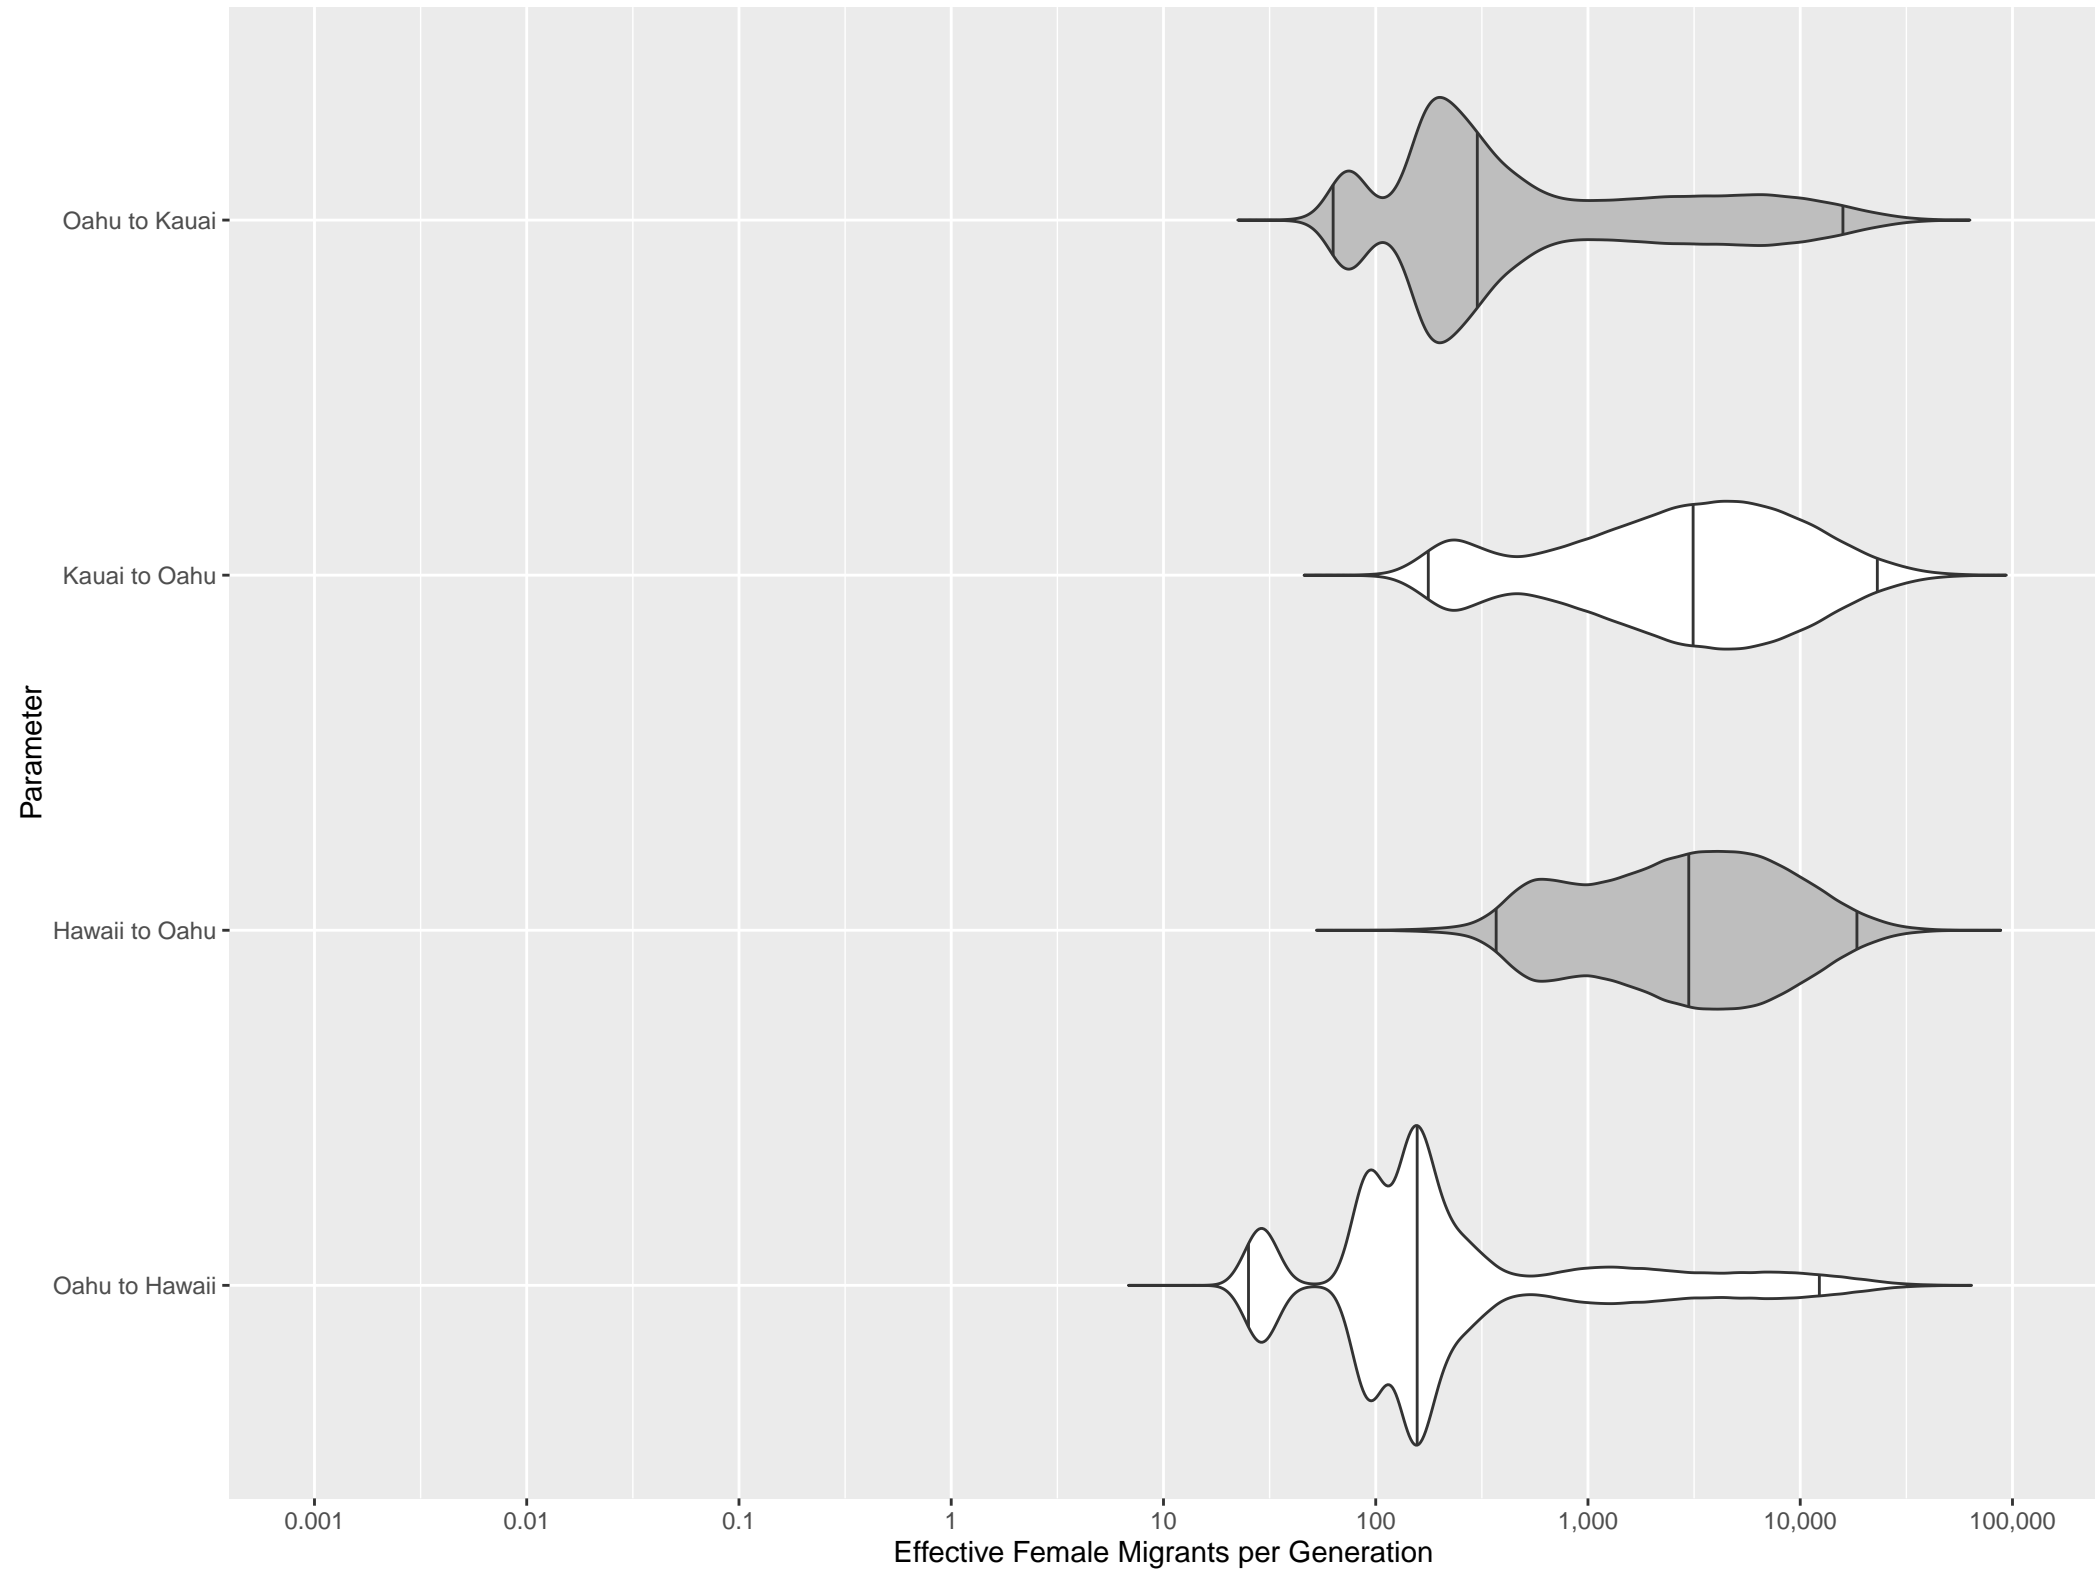

# Caranx melampygyus

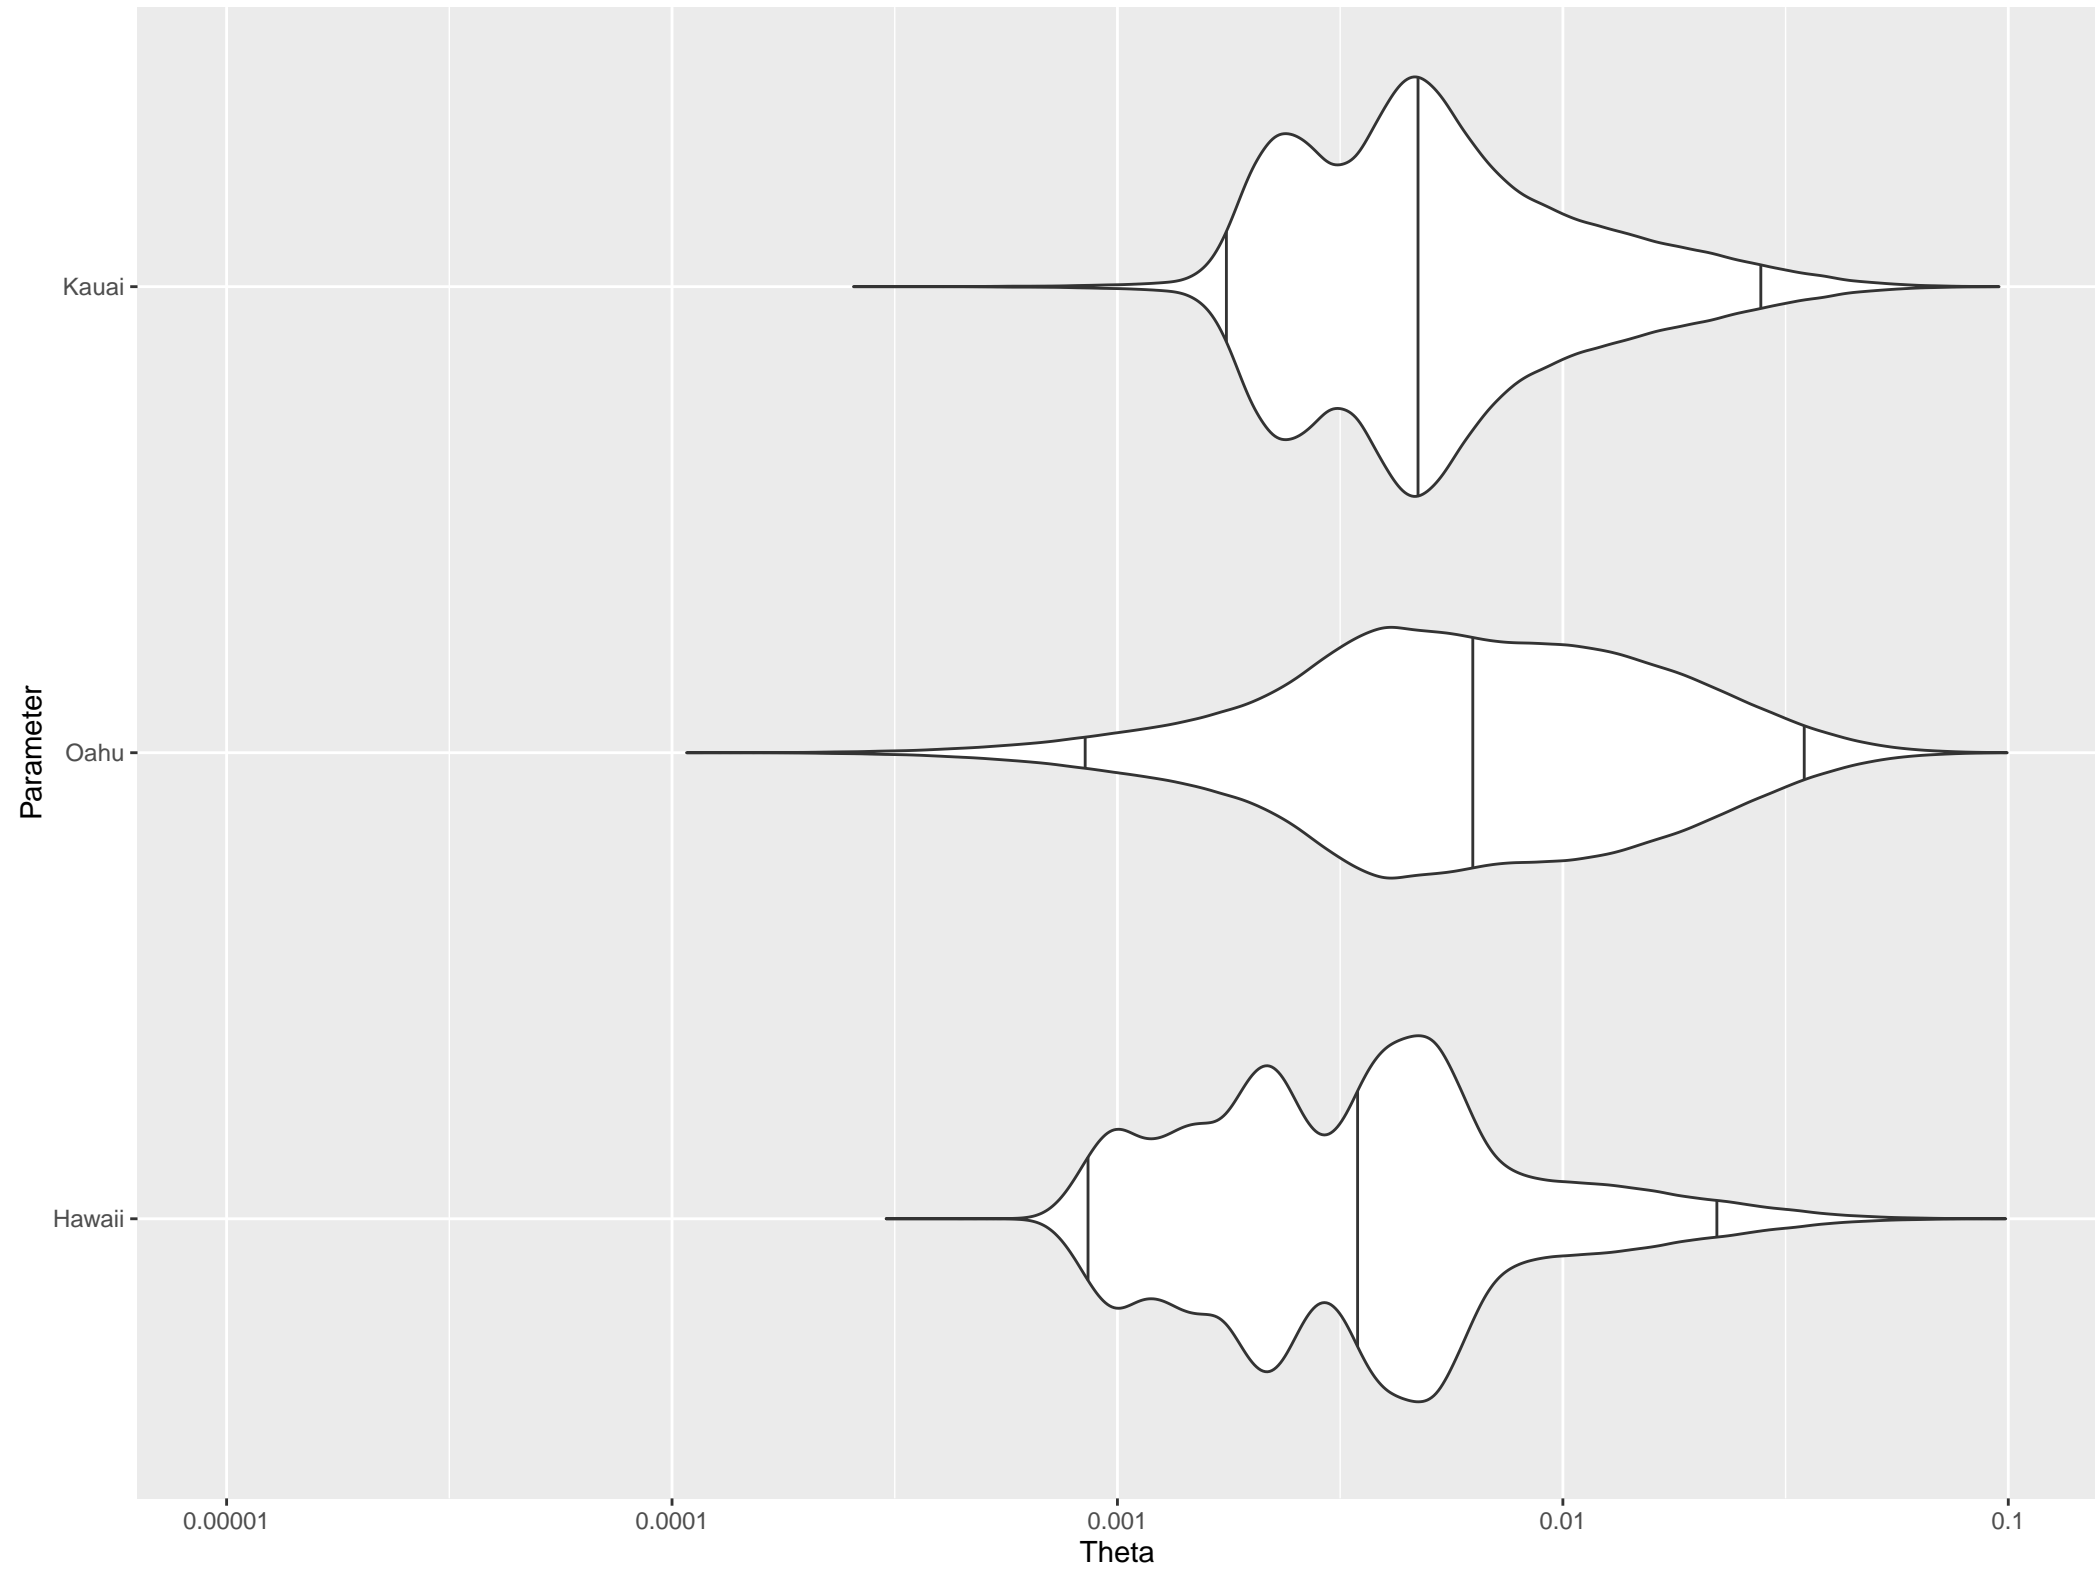

# Cellana exarata

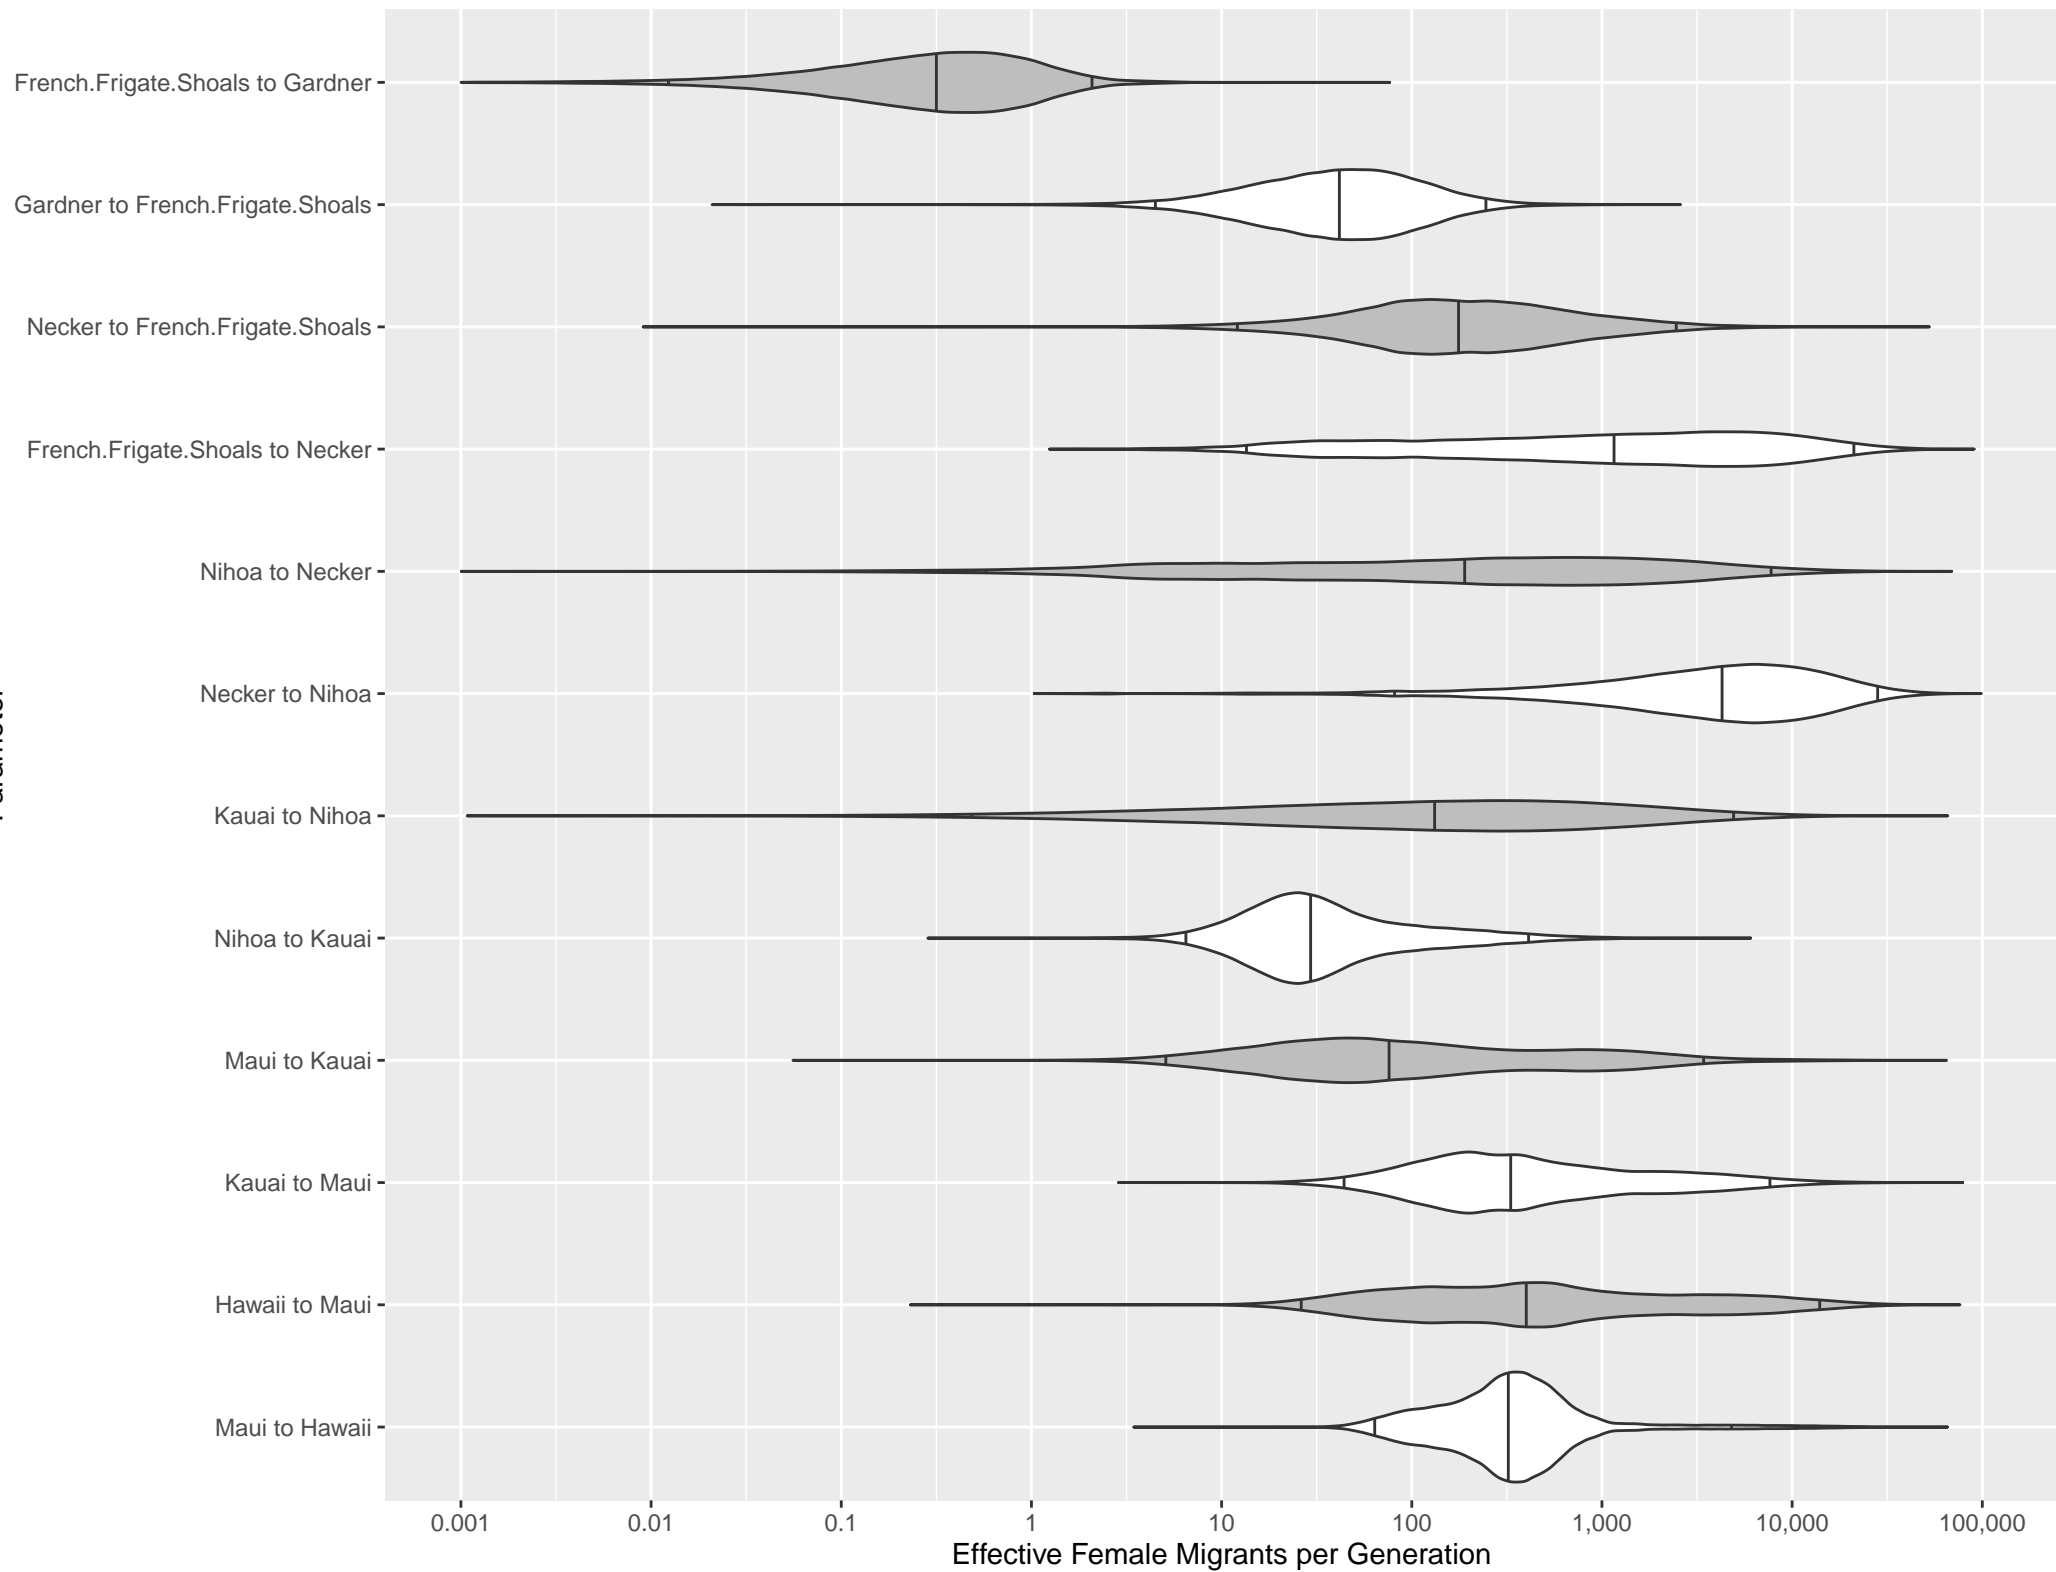

# Cellana exarata

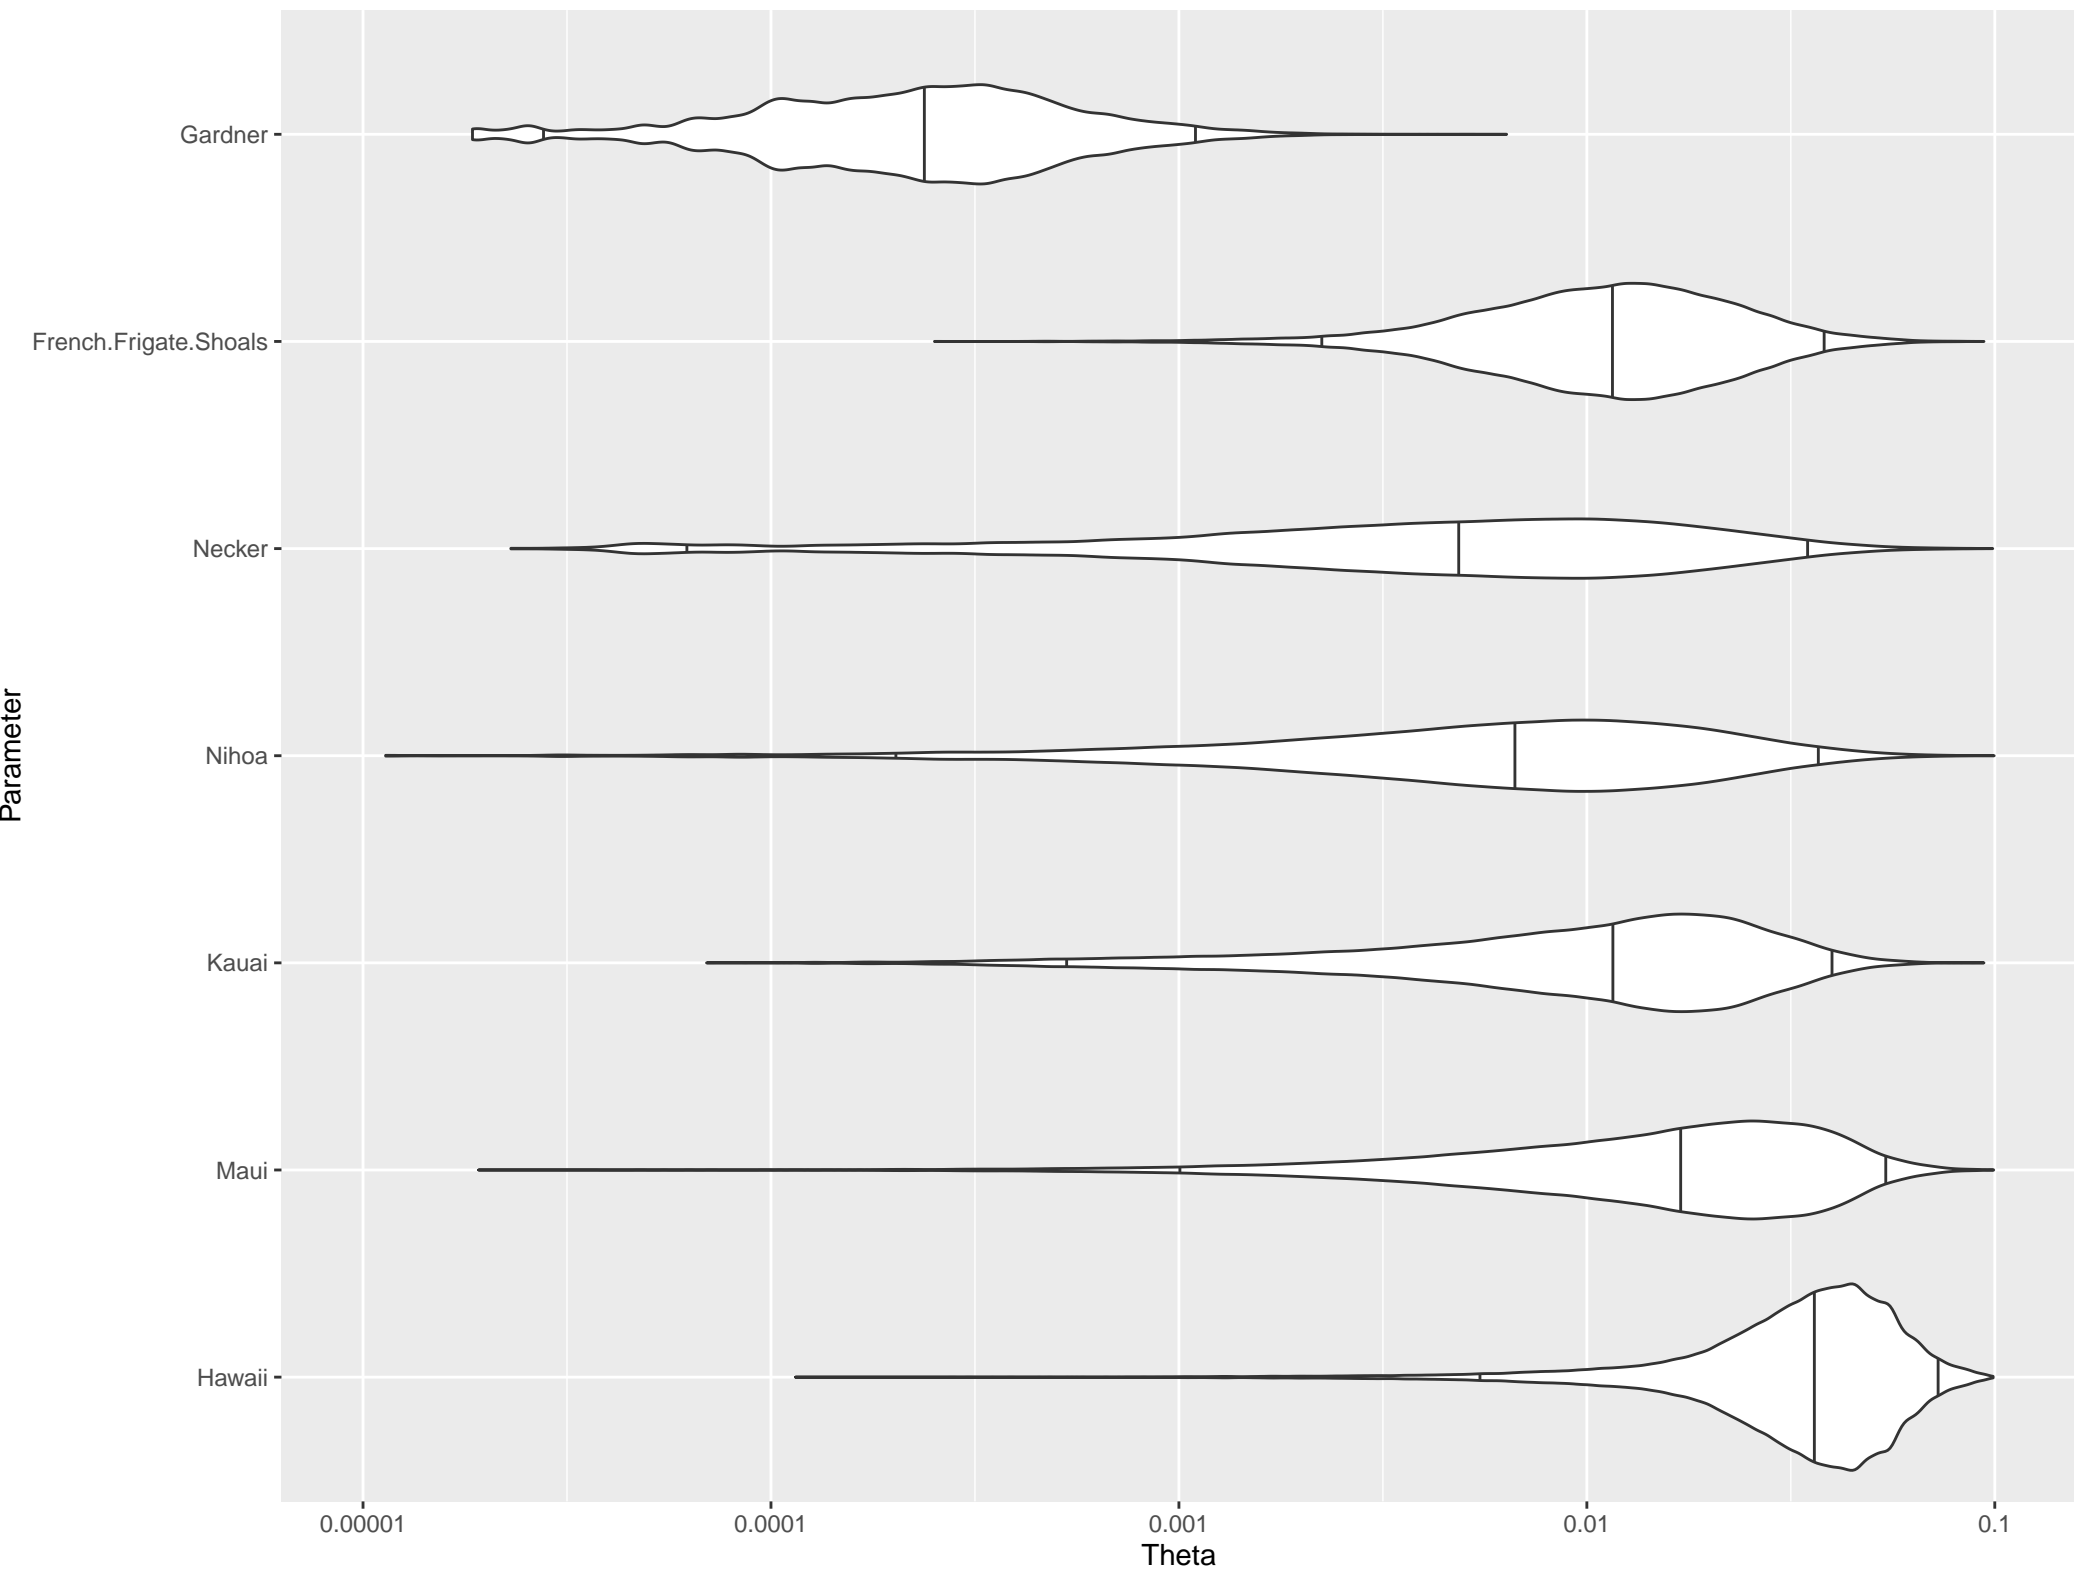

Cellana sandwichensis

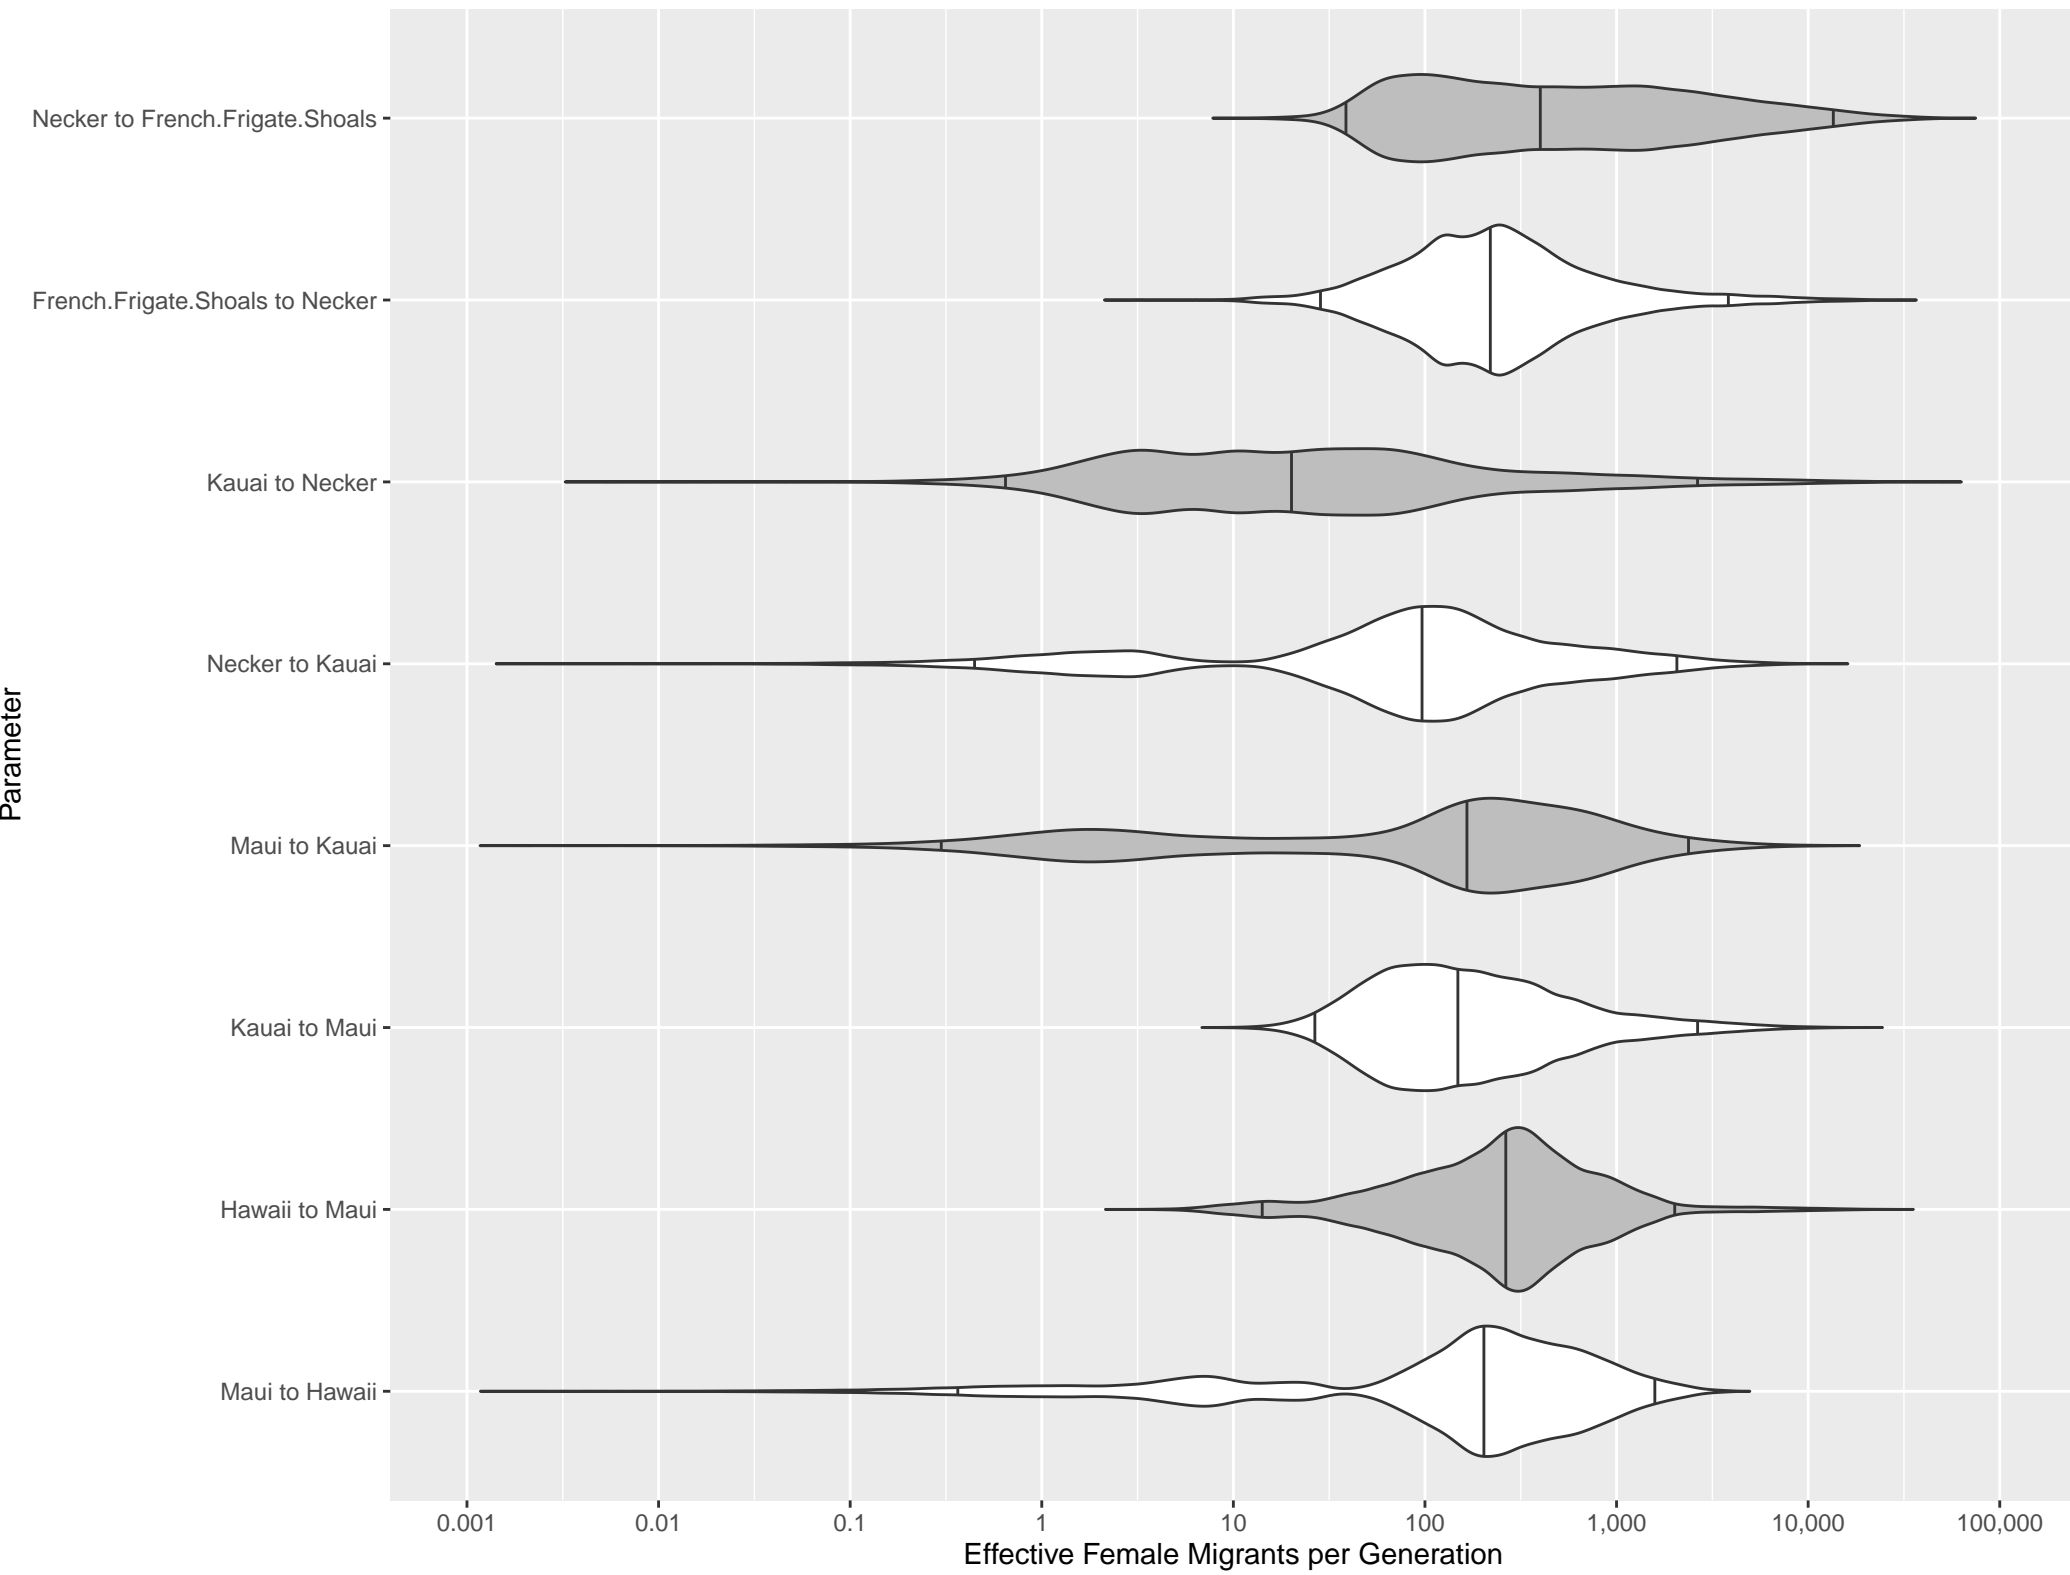

Cellana sandwicensis

French.Frigate.Shoals

Necker

Kauai

Maui

Hawaii

Parameter

0.00001

0.0001

0.001

0.01

0.1

Theta

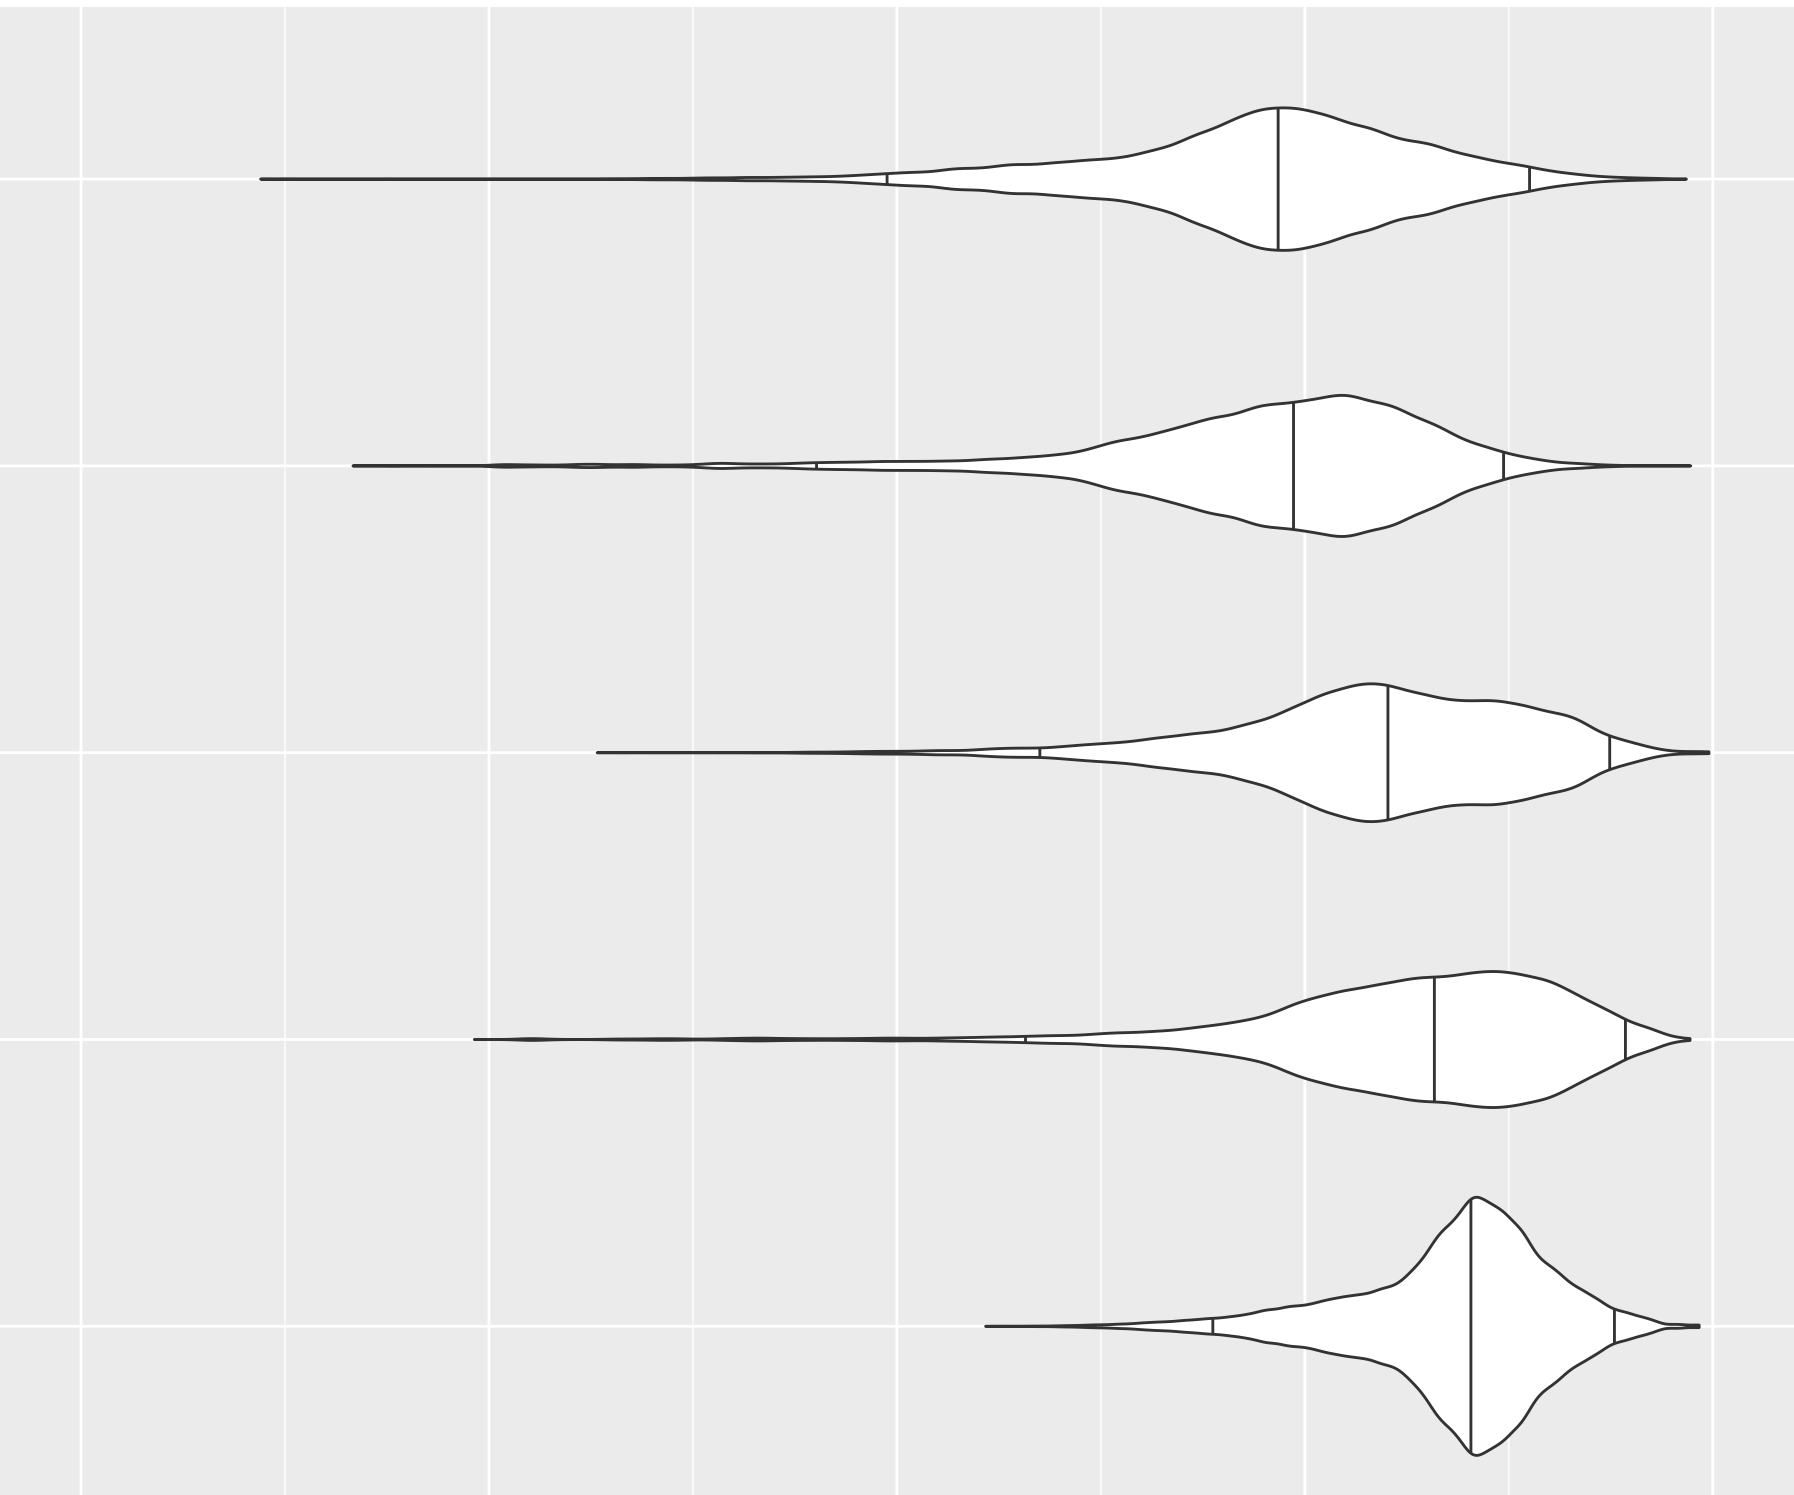



# Cellana talcosa

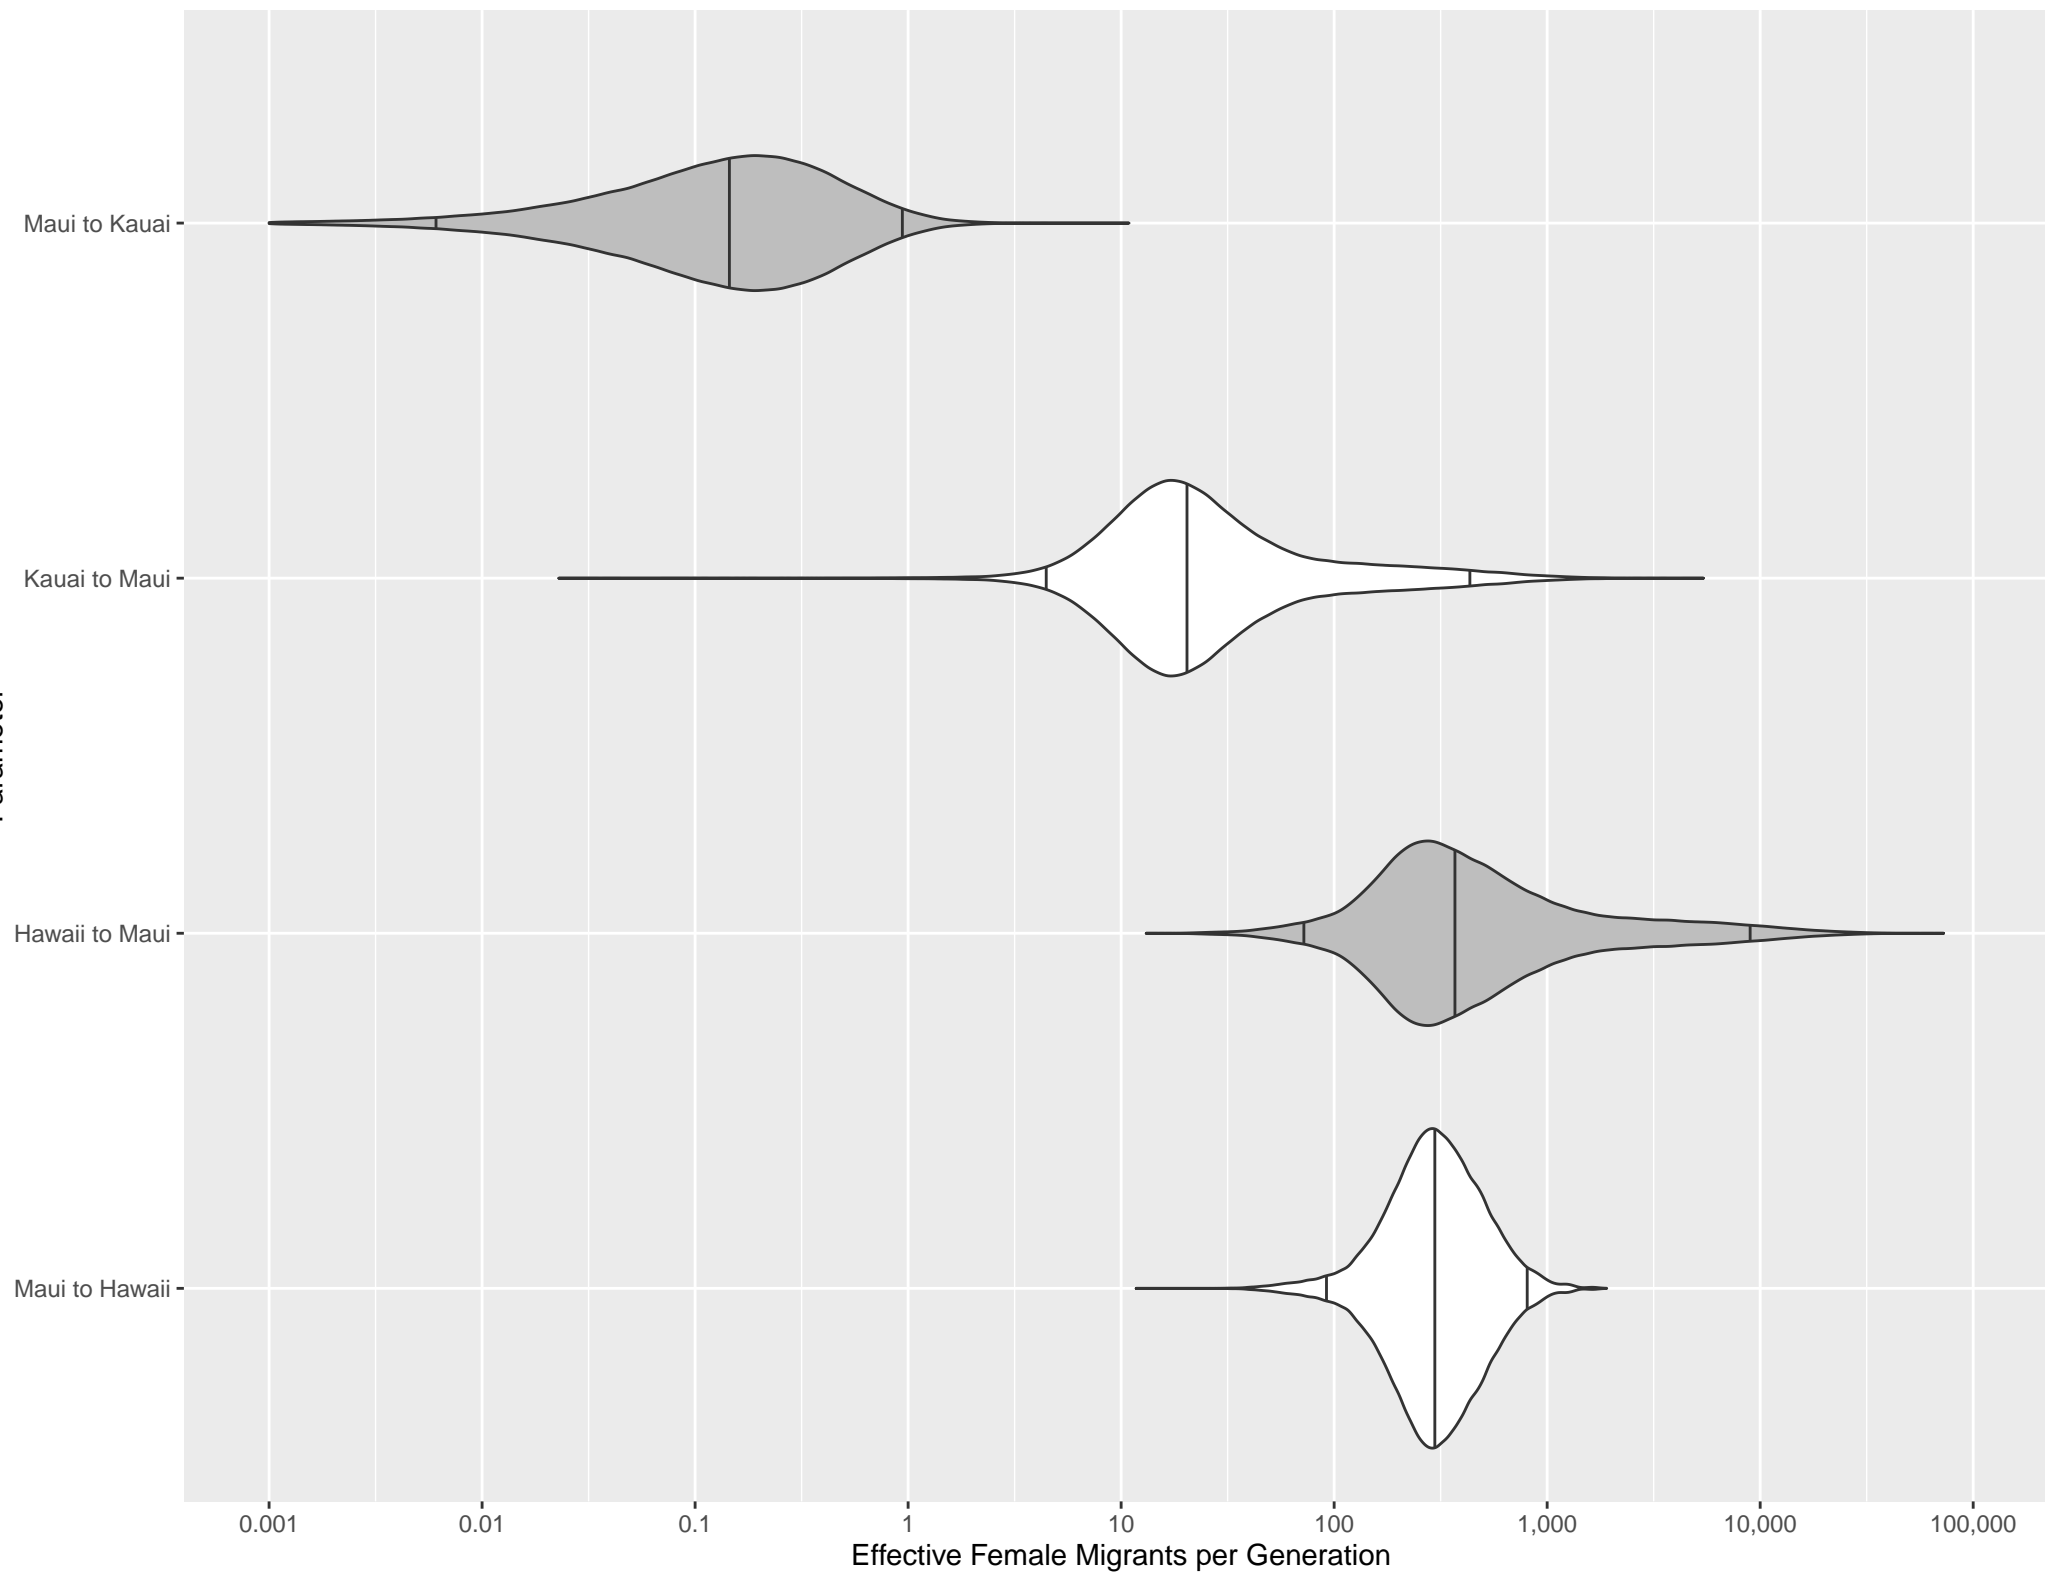

Cellana talcosa

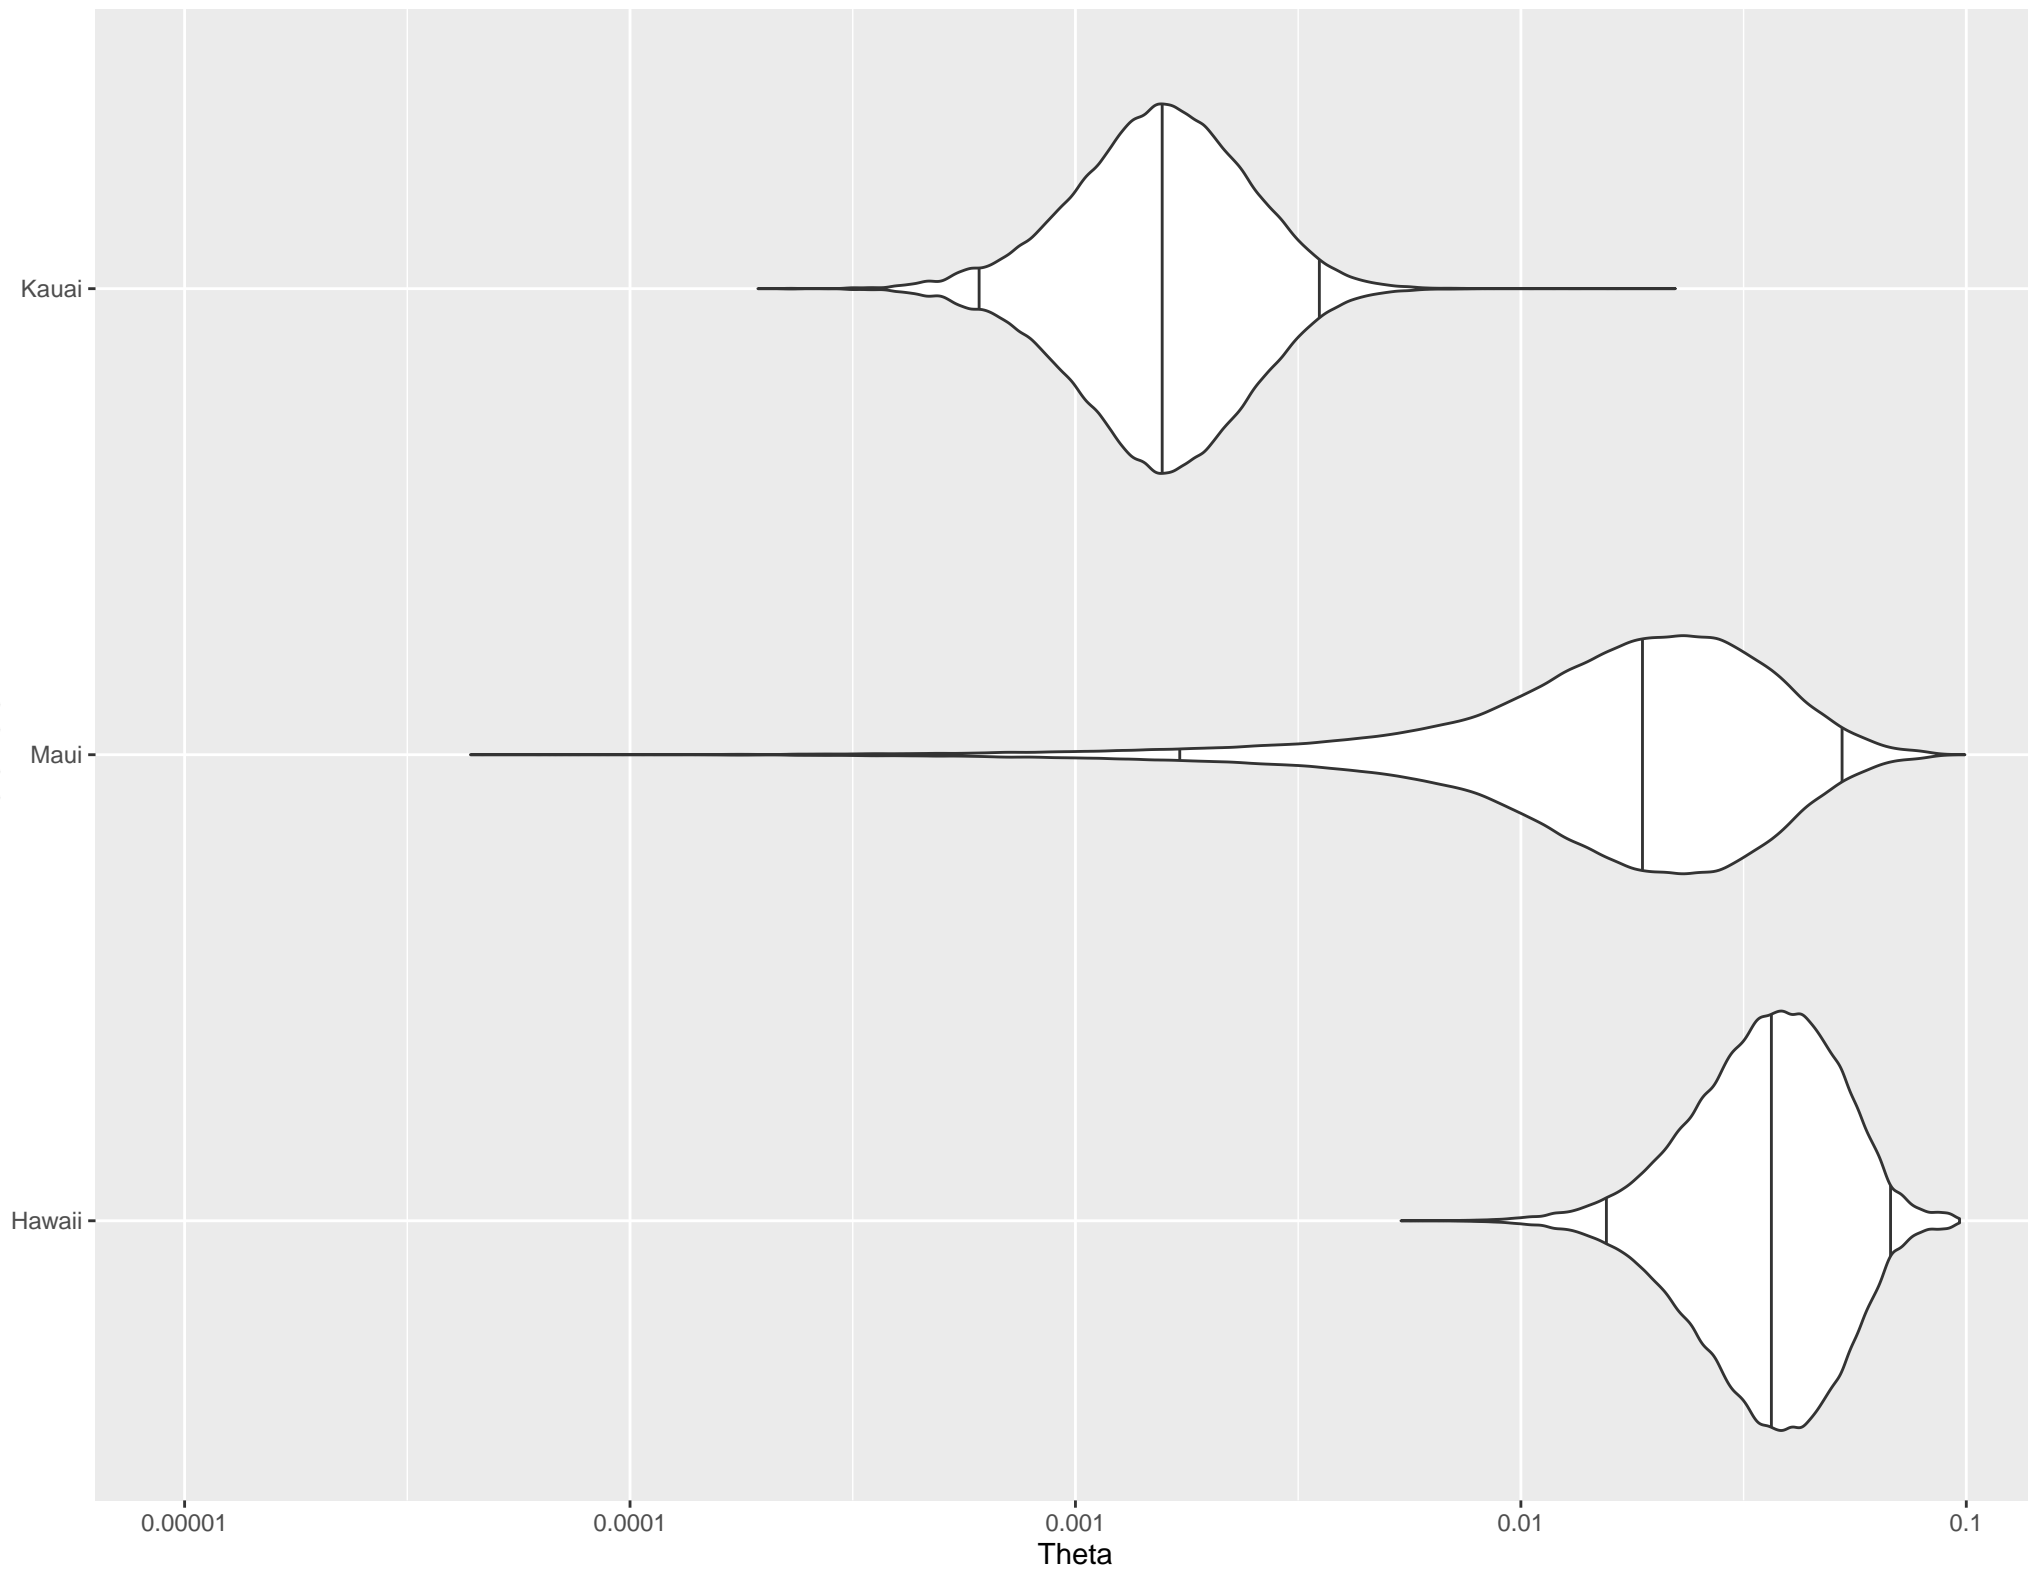

# Chaetodon lunulatus

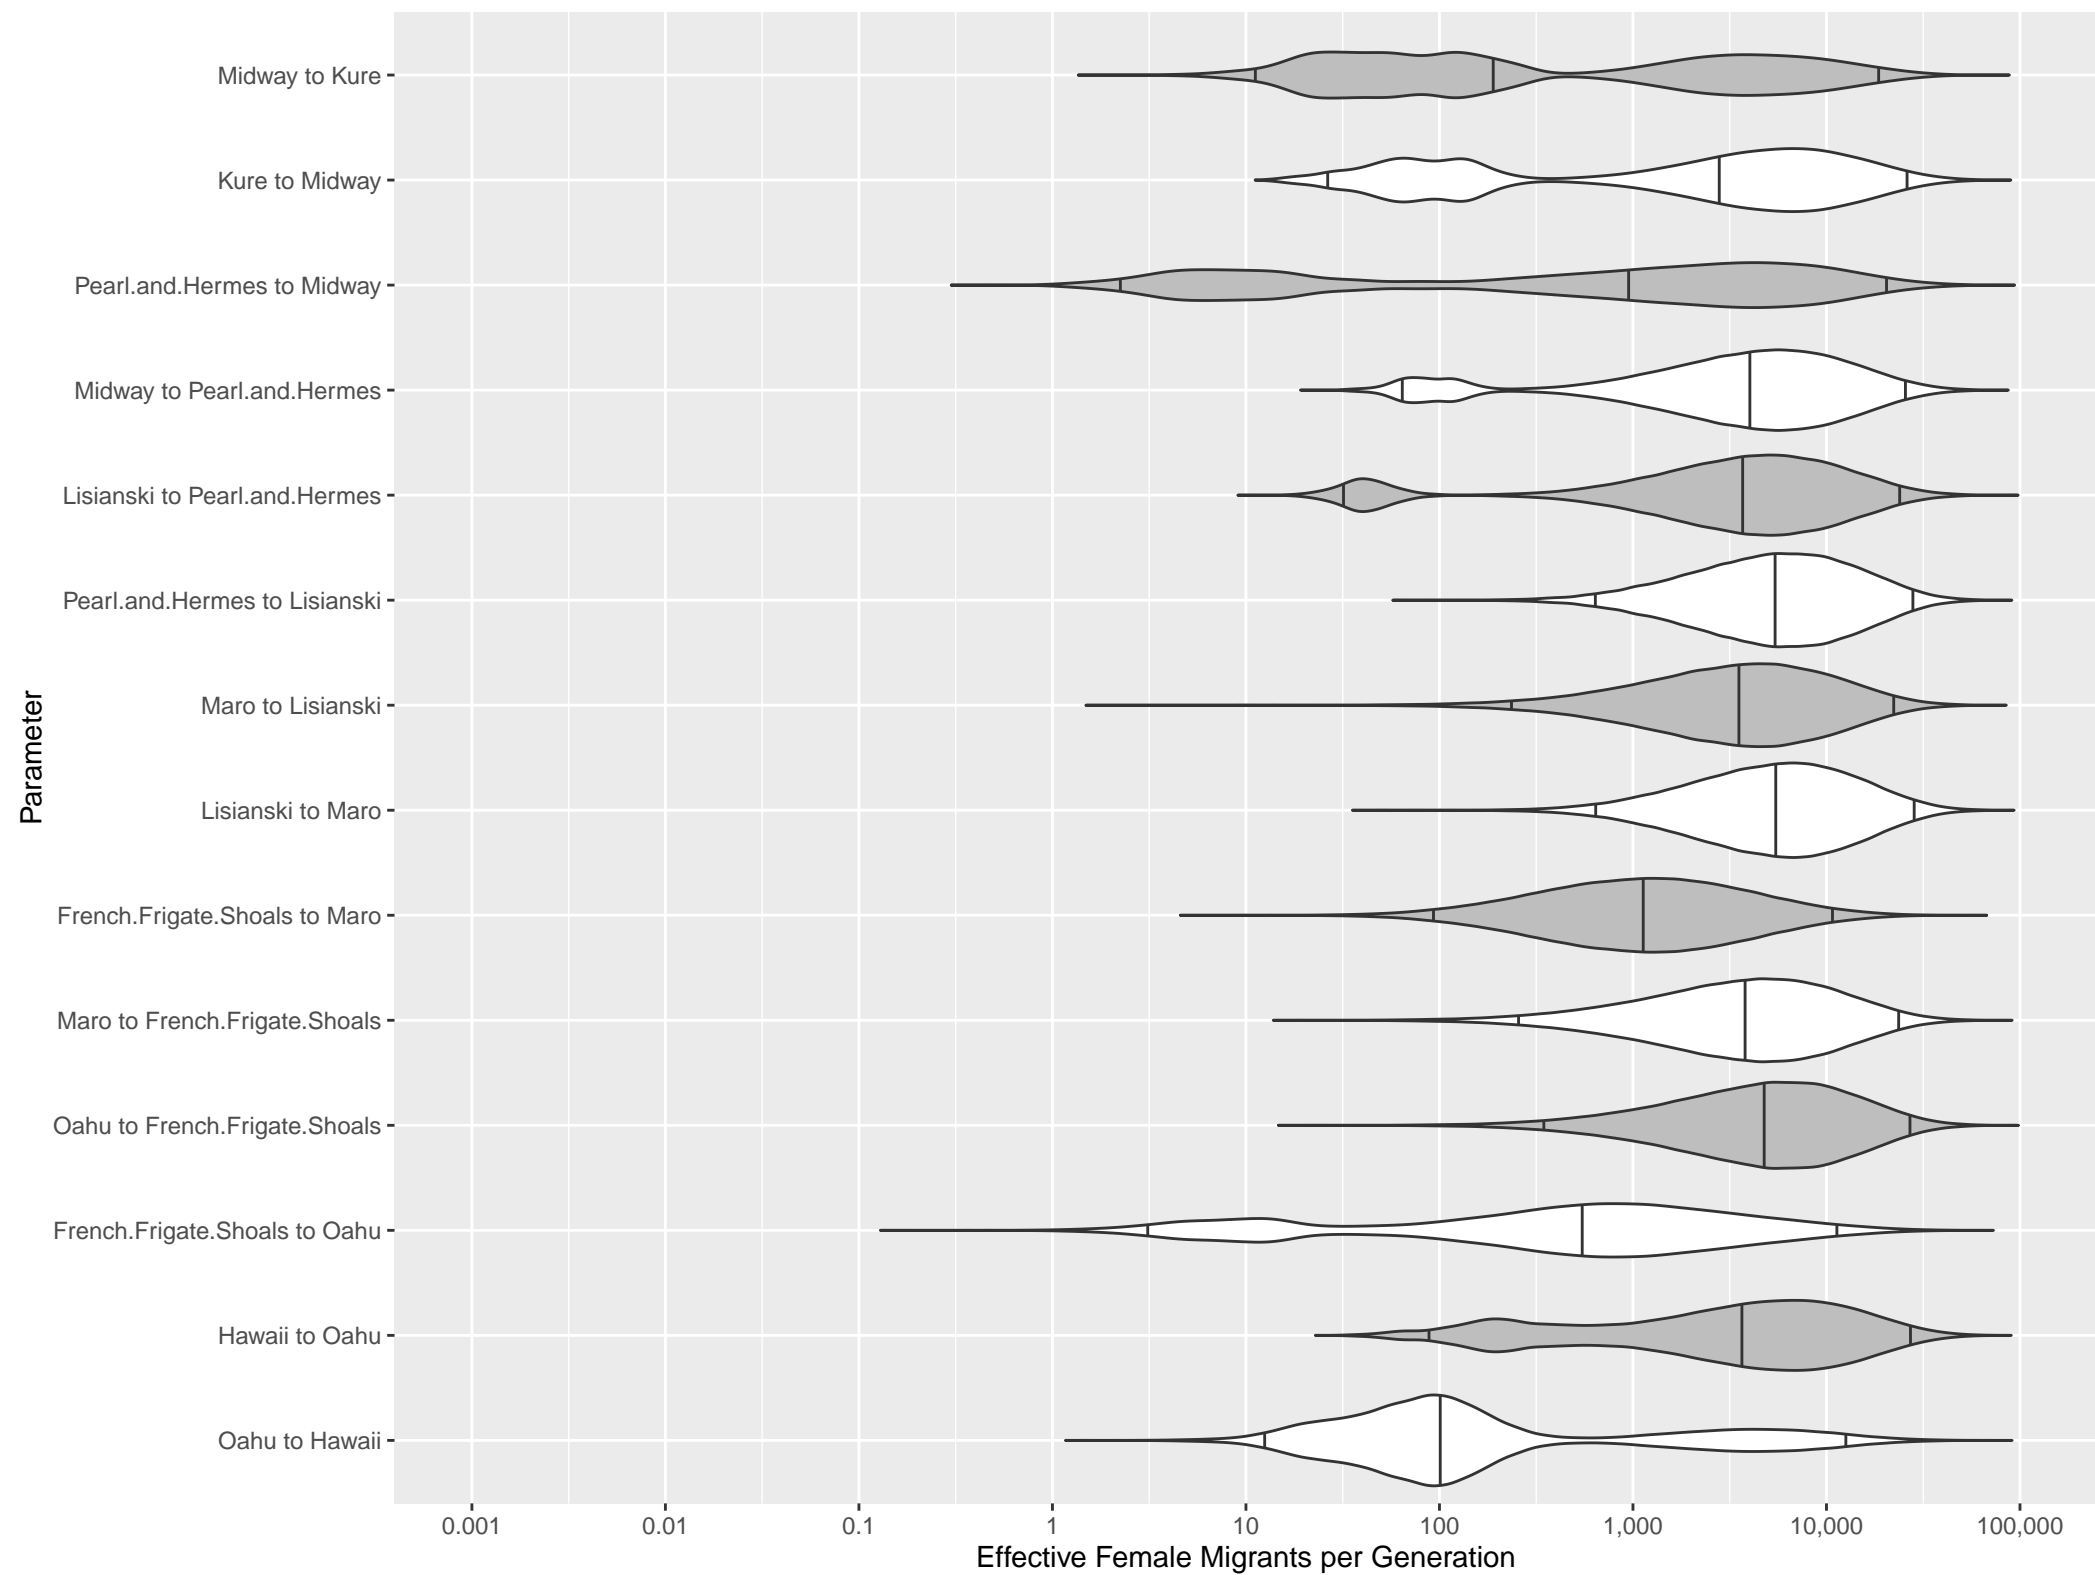

# Chaetodon lunulatus

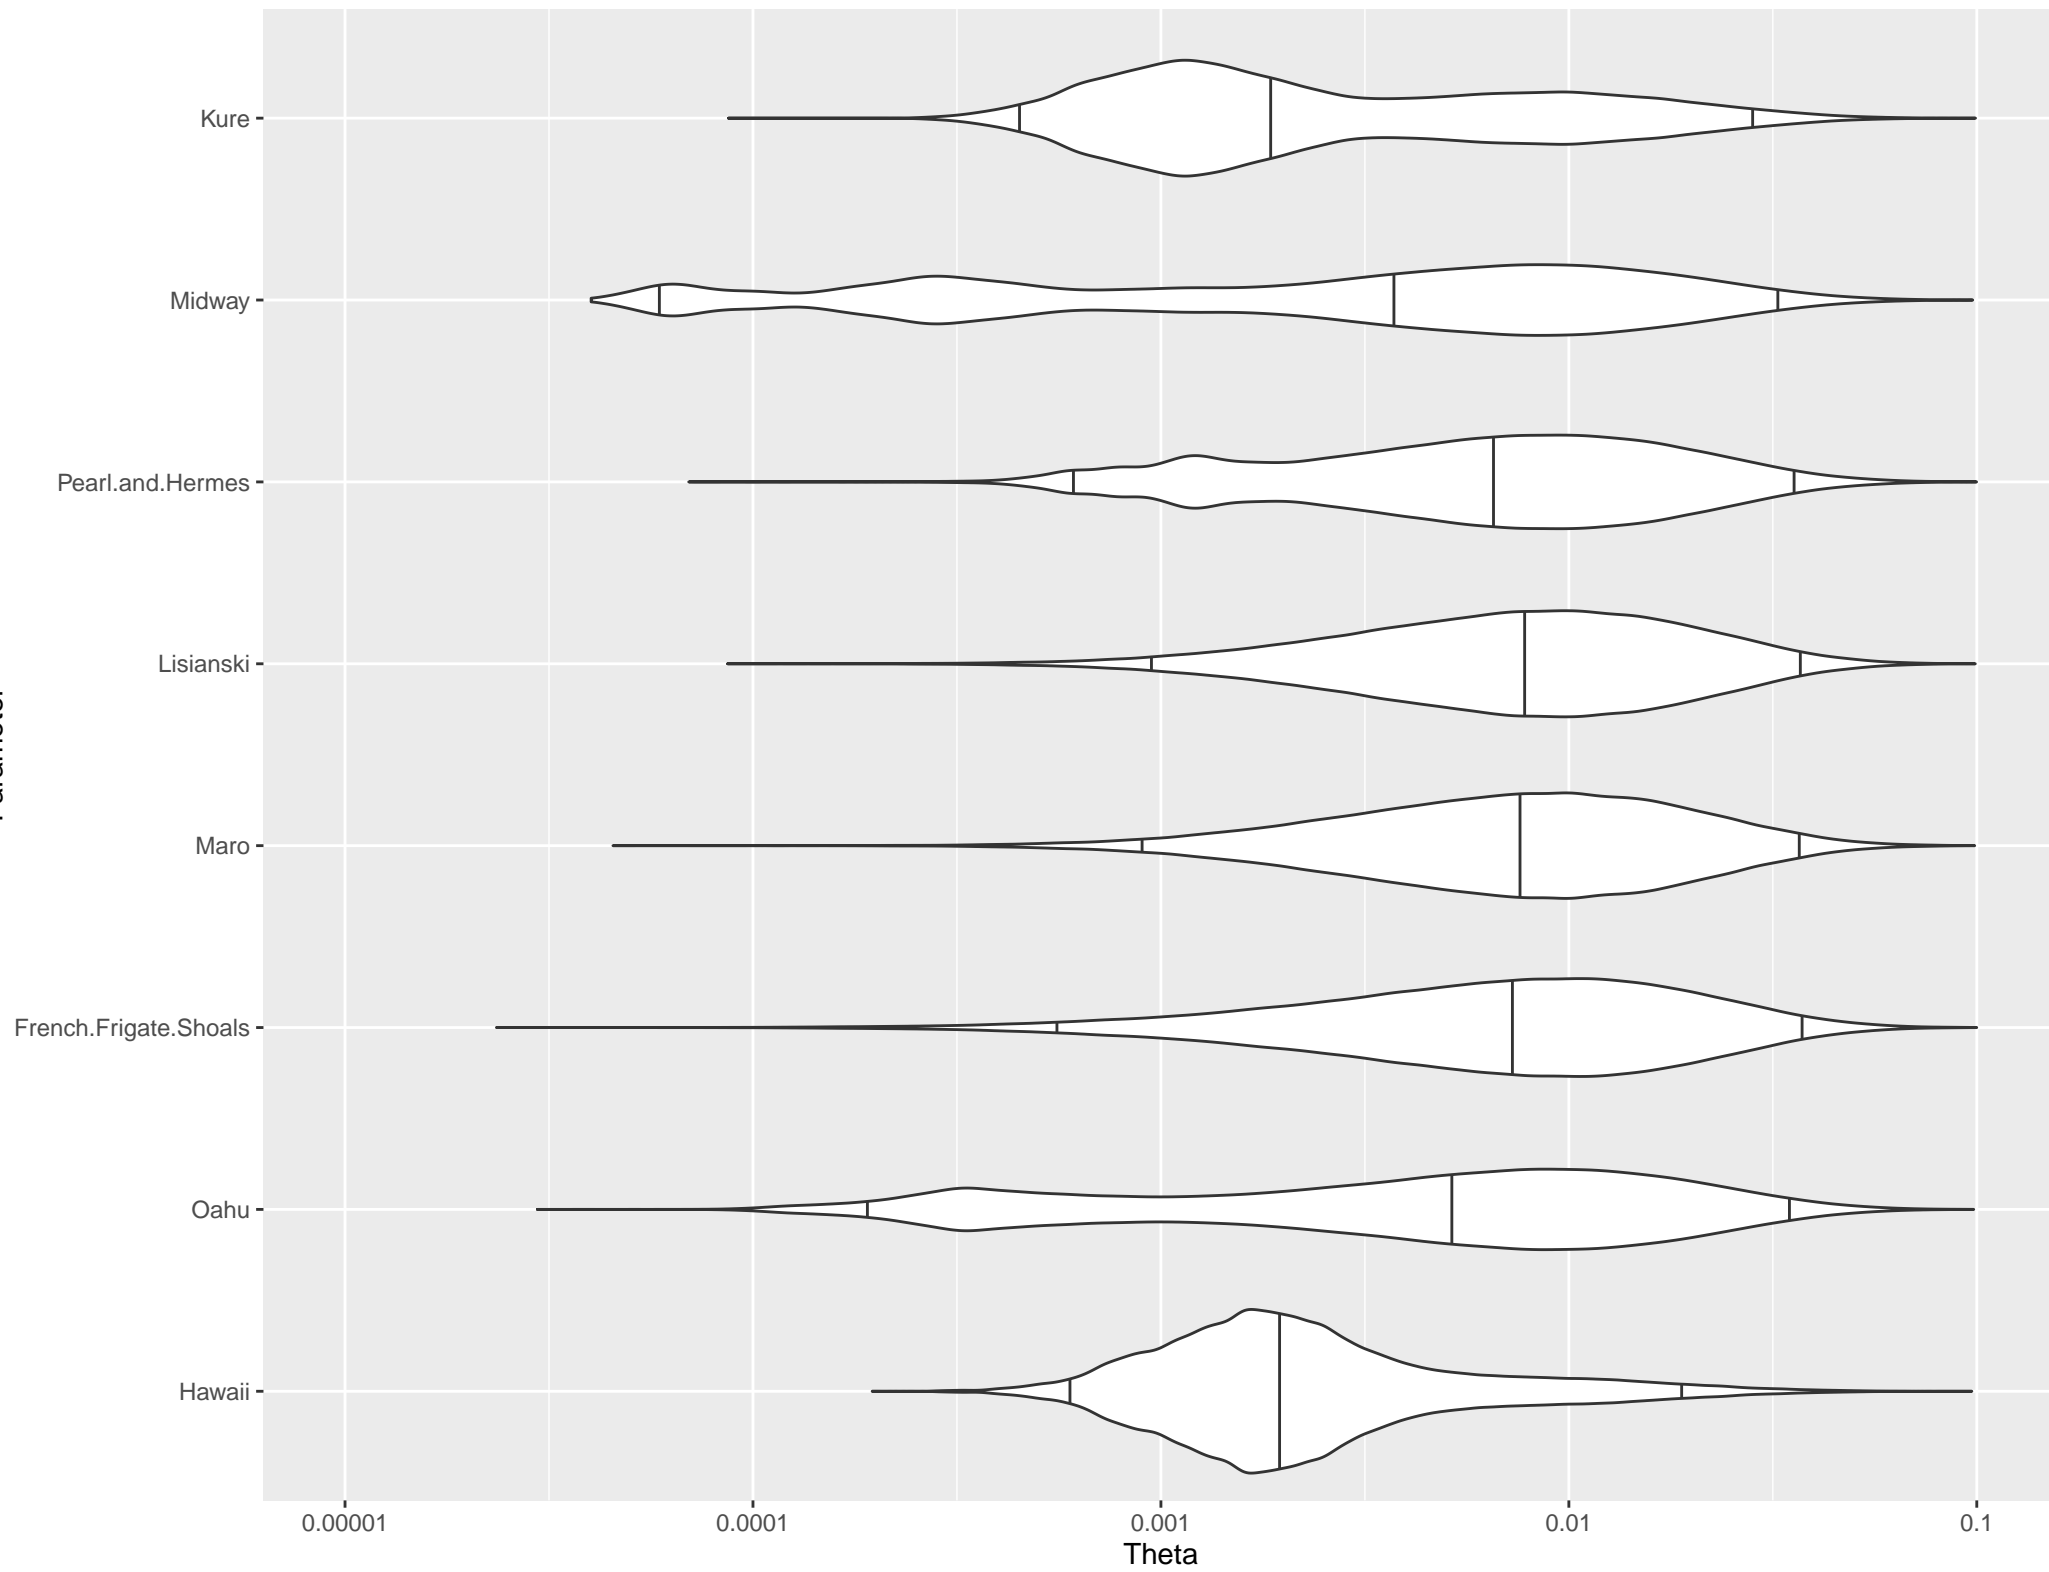

# Chaetodon miliaris

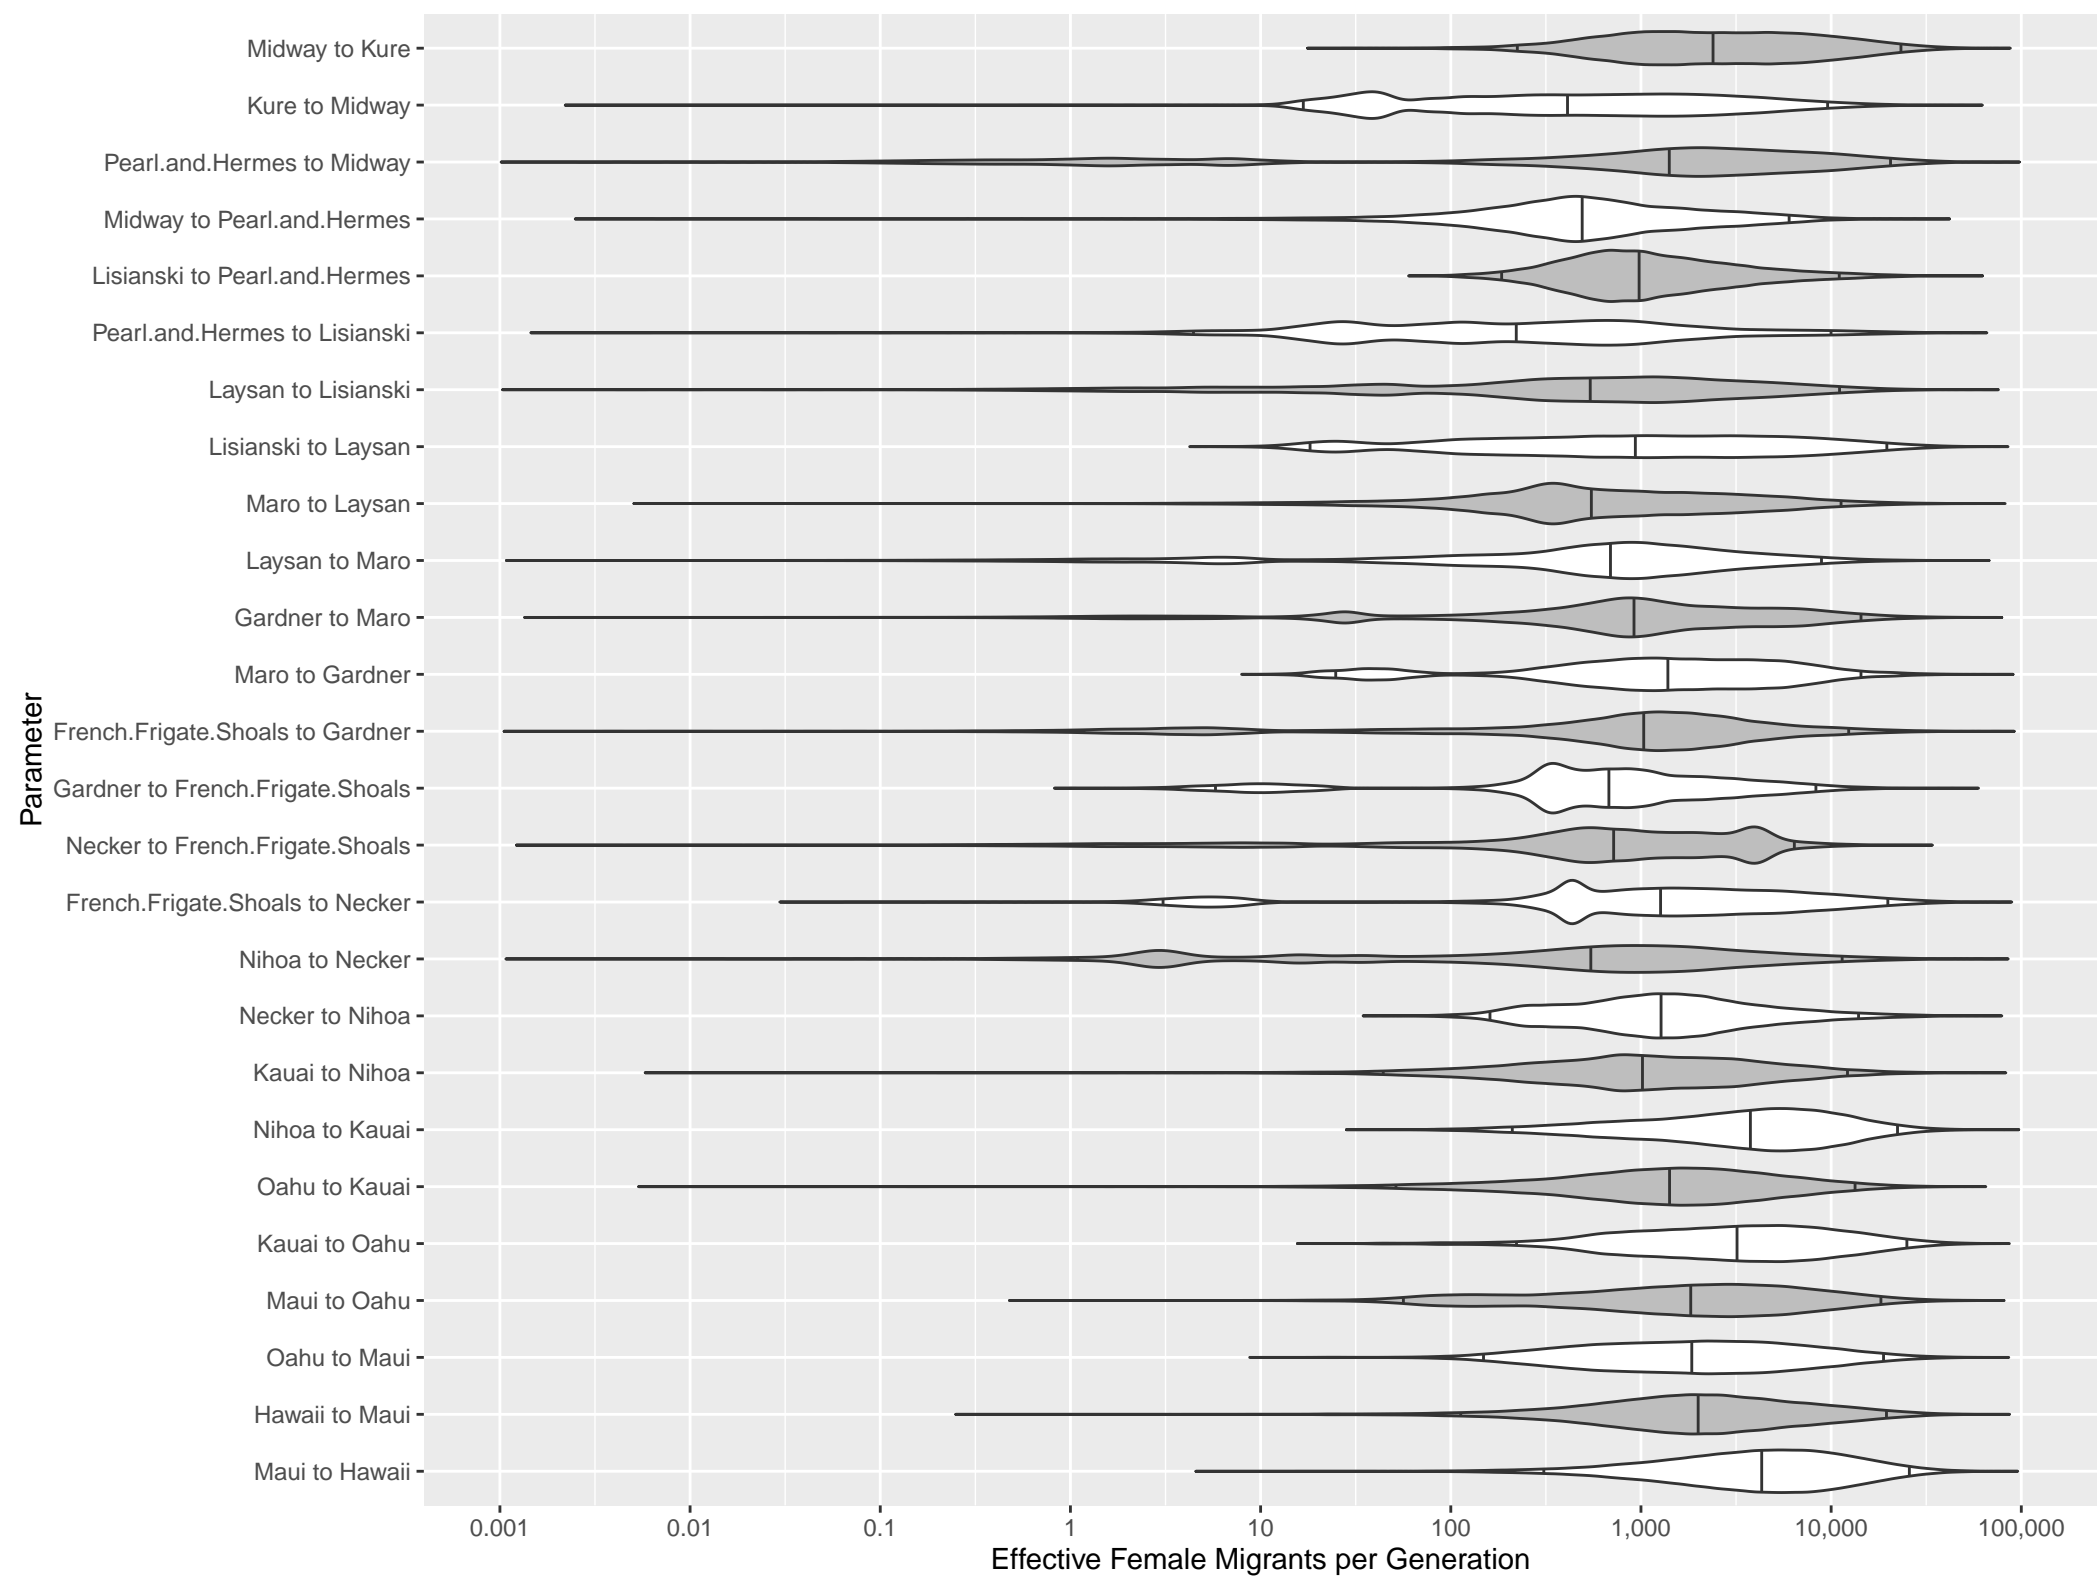

# Chaetodon miliaris

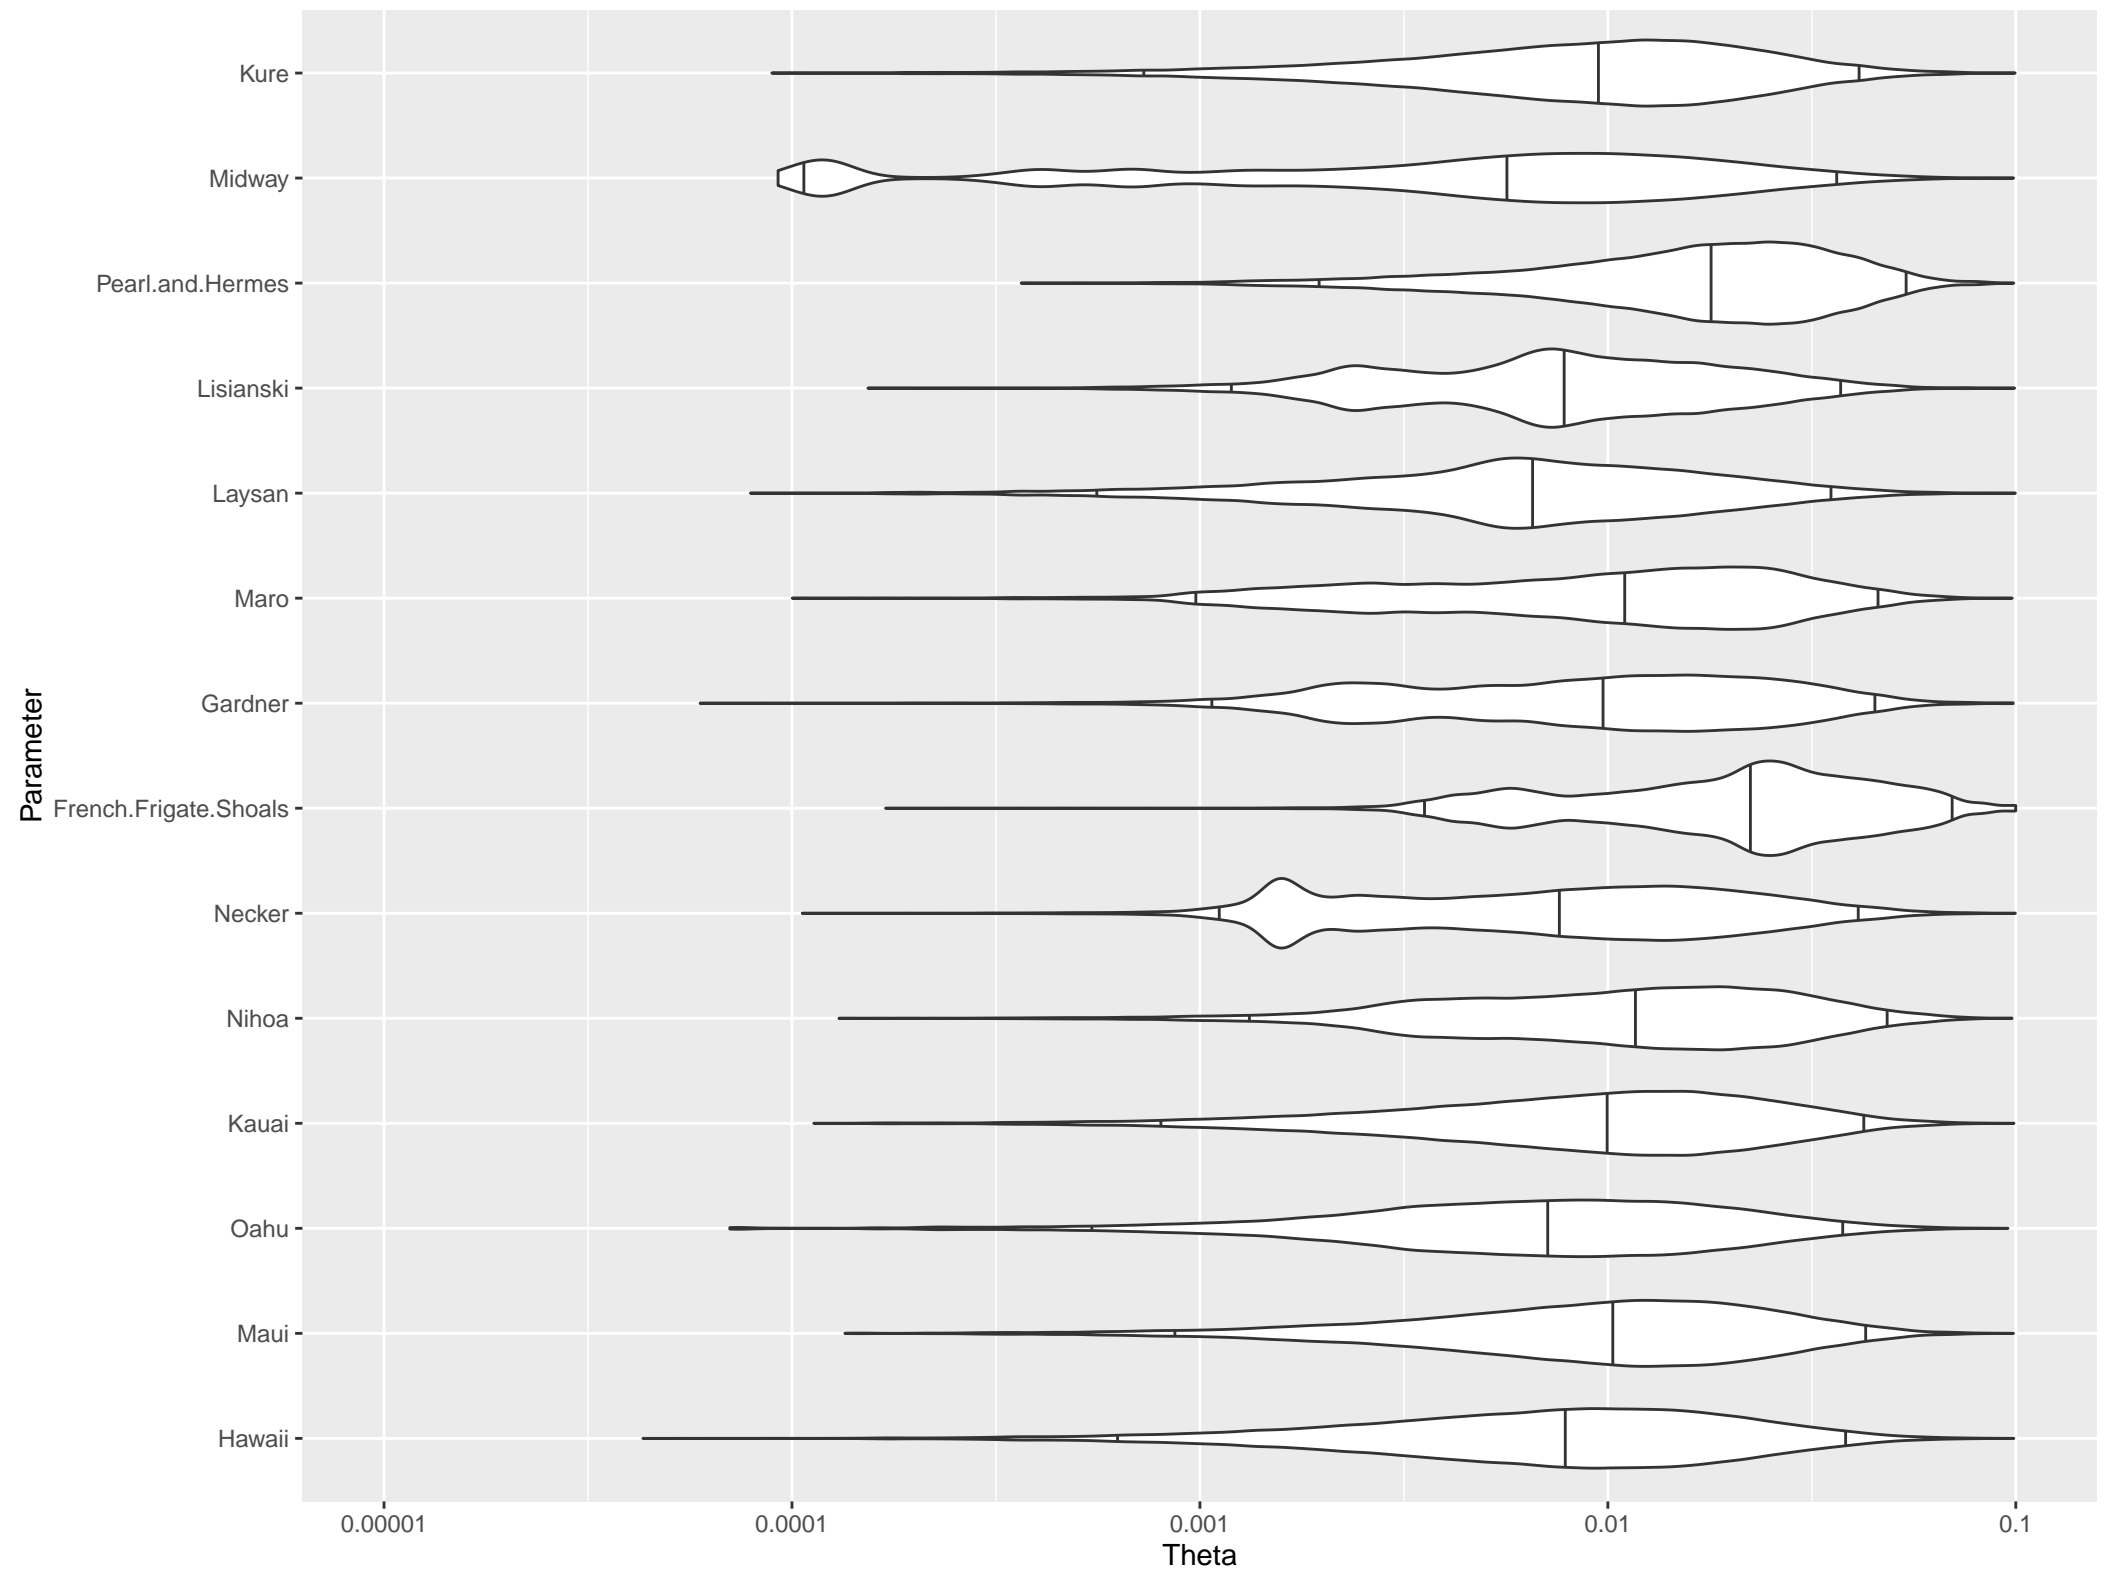

# Chaetodon multicinctus

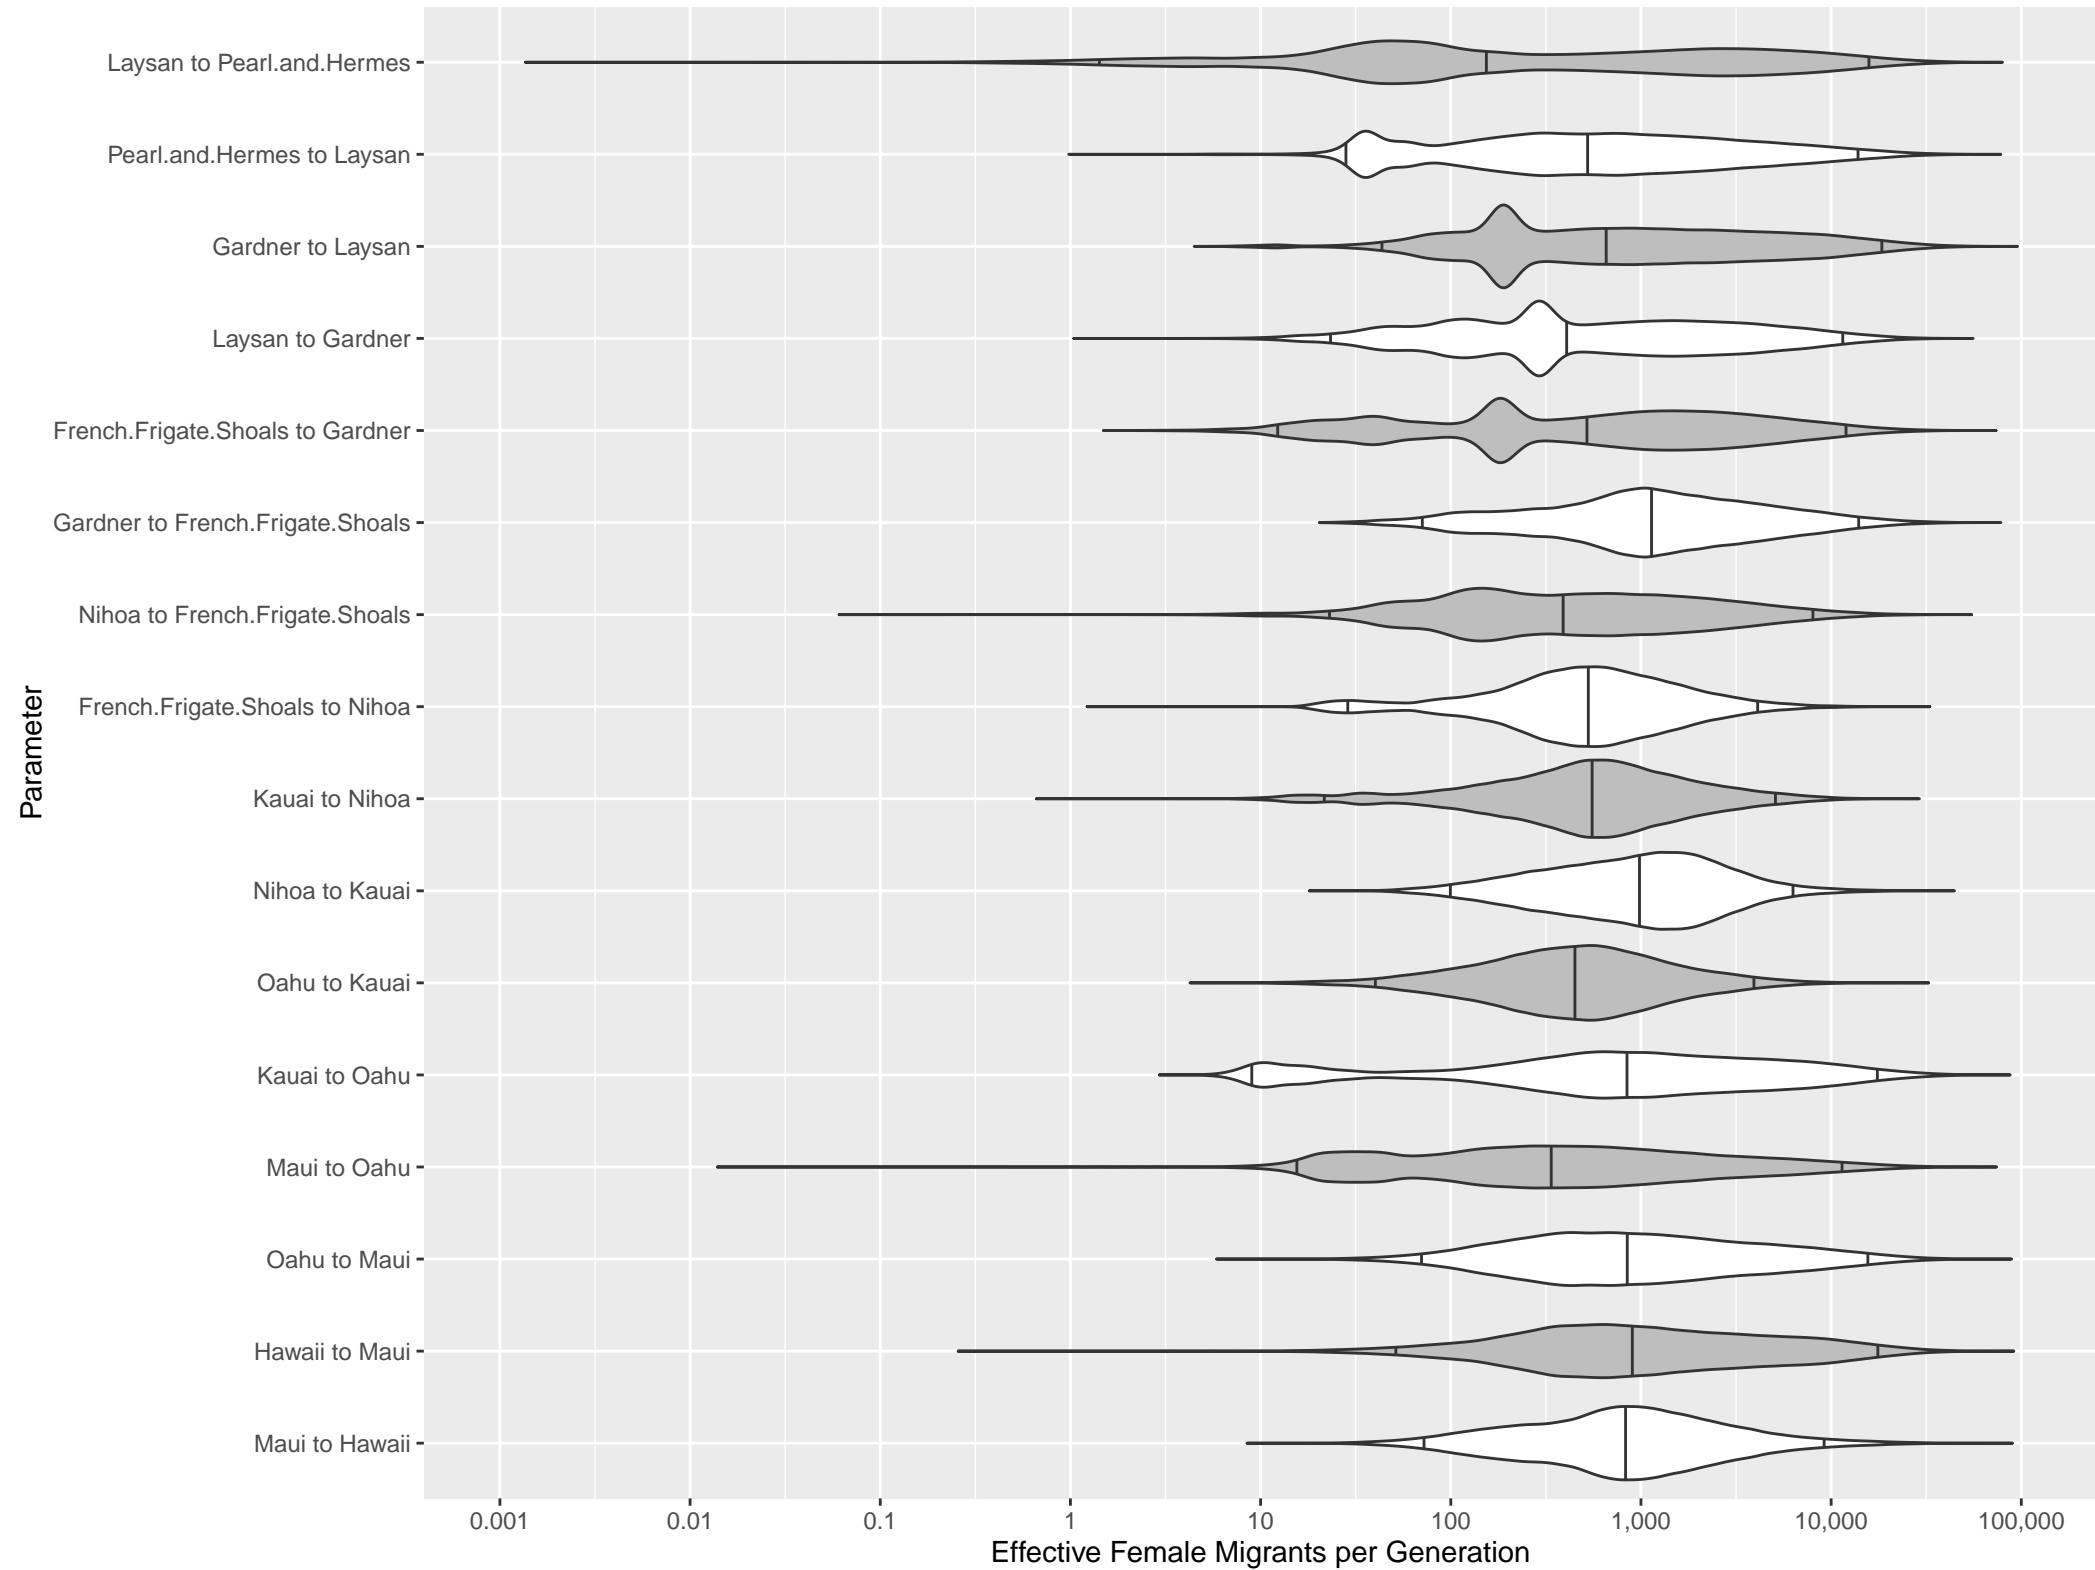

# Chaetodon multicinctus

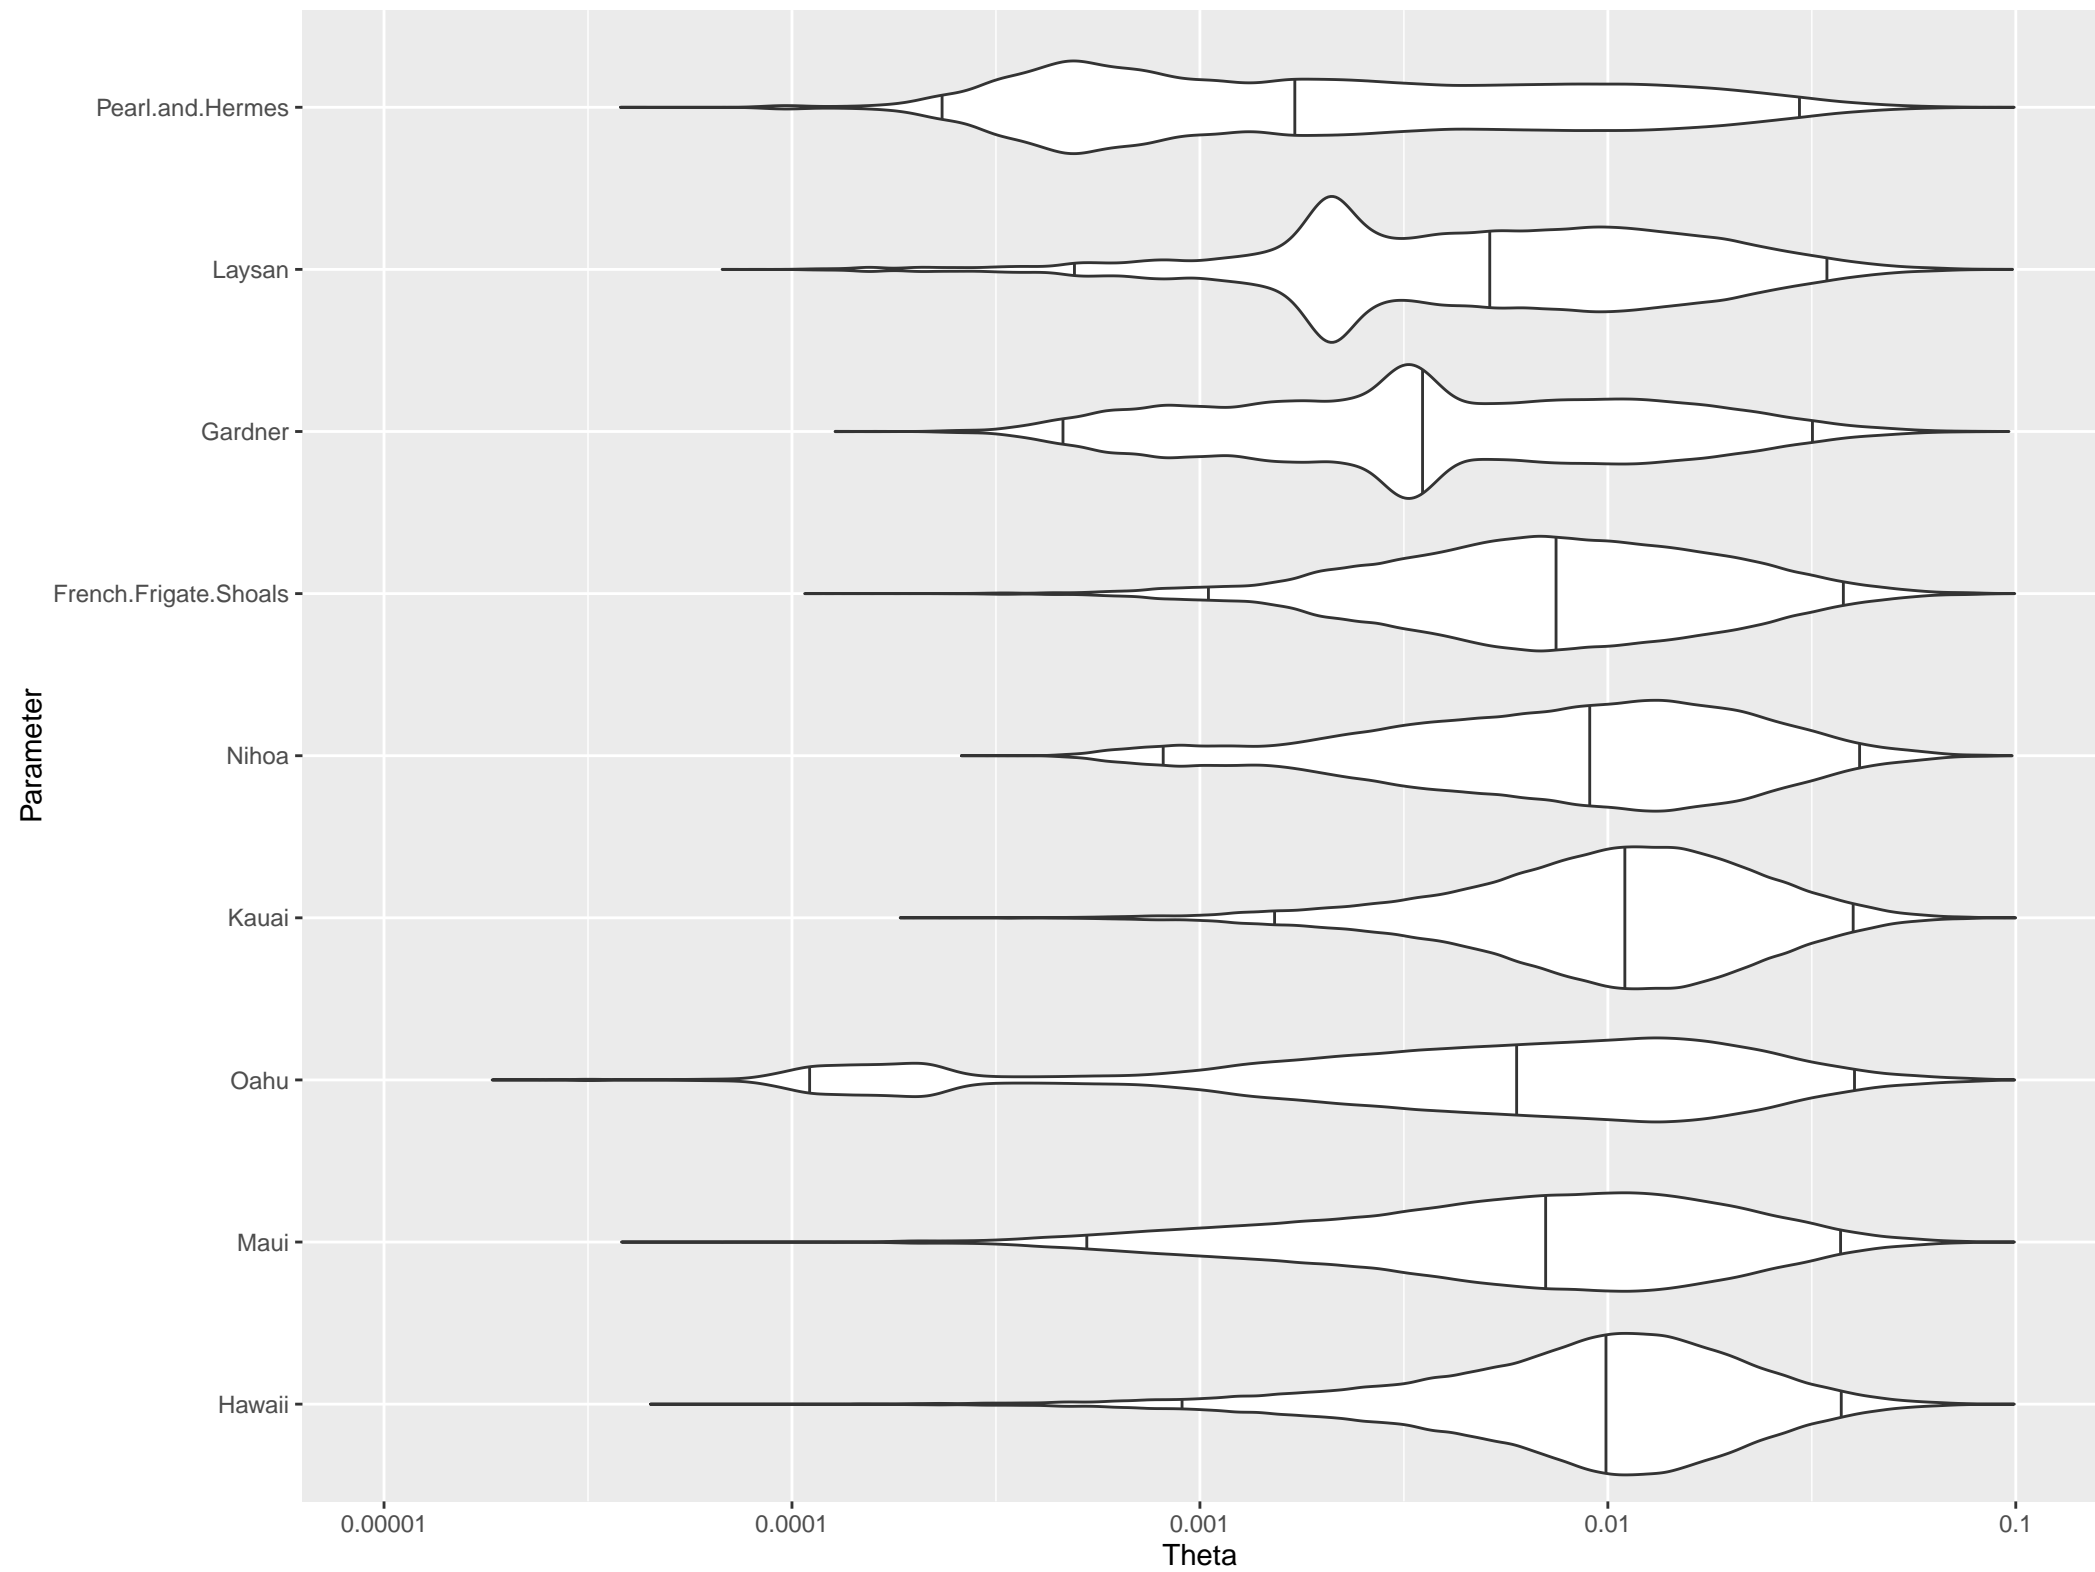



*Ctenochaetus strigosus*

Parameter

Maui to Hawaii

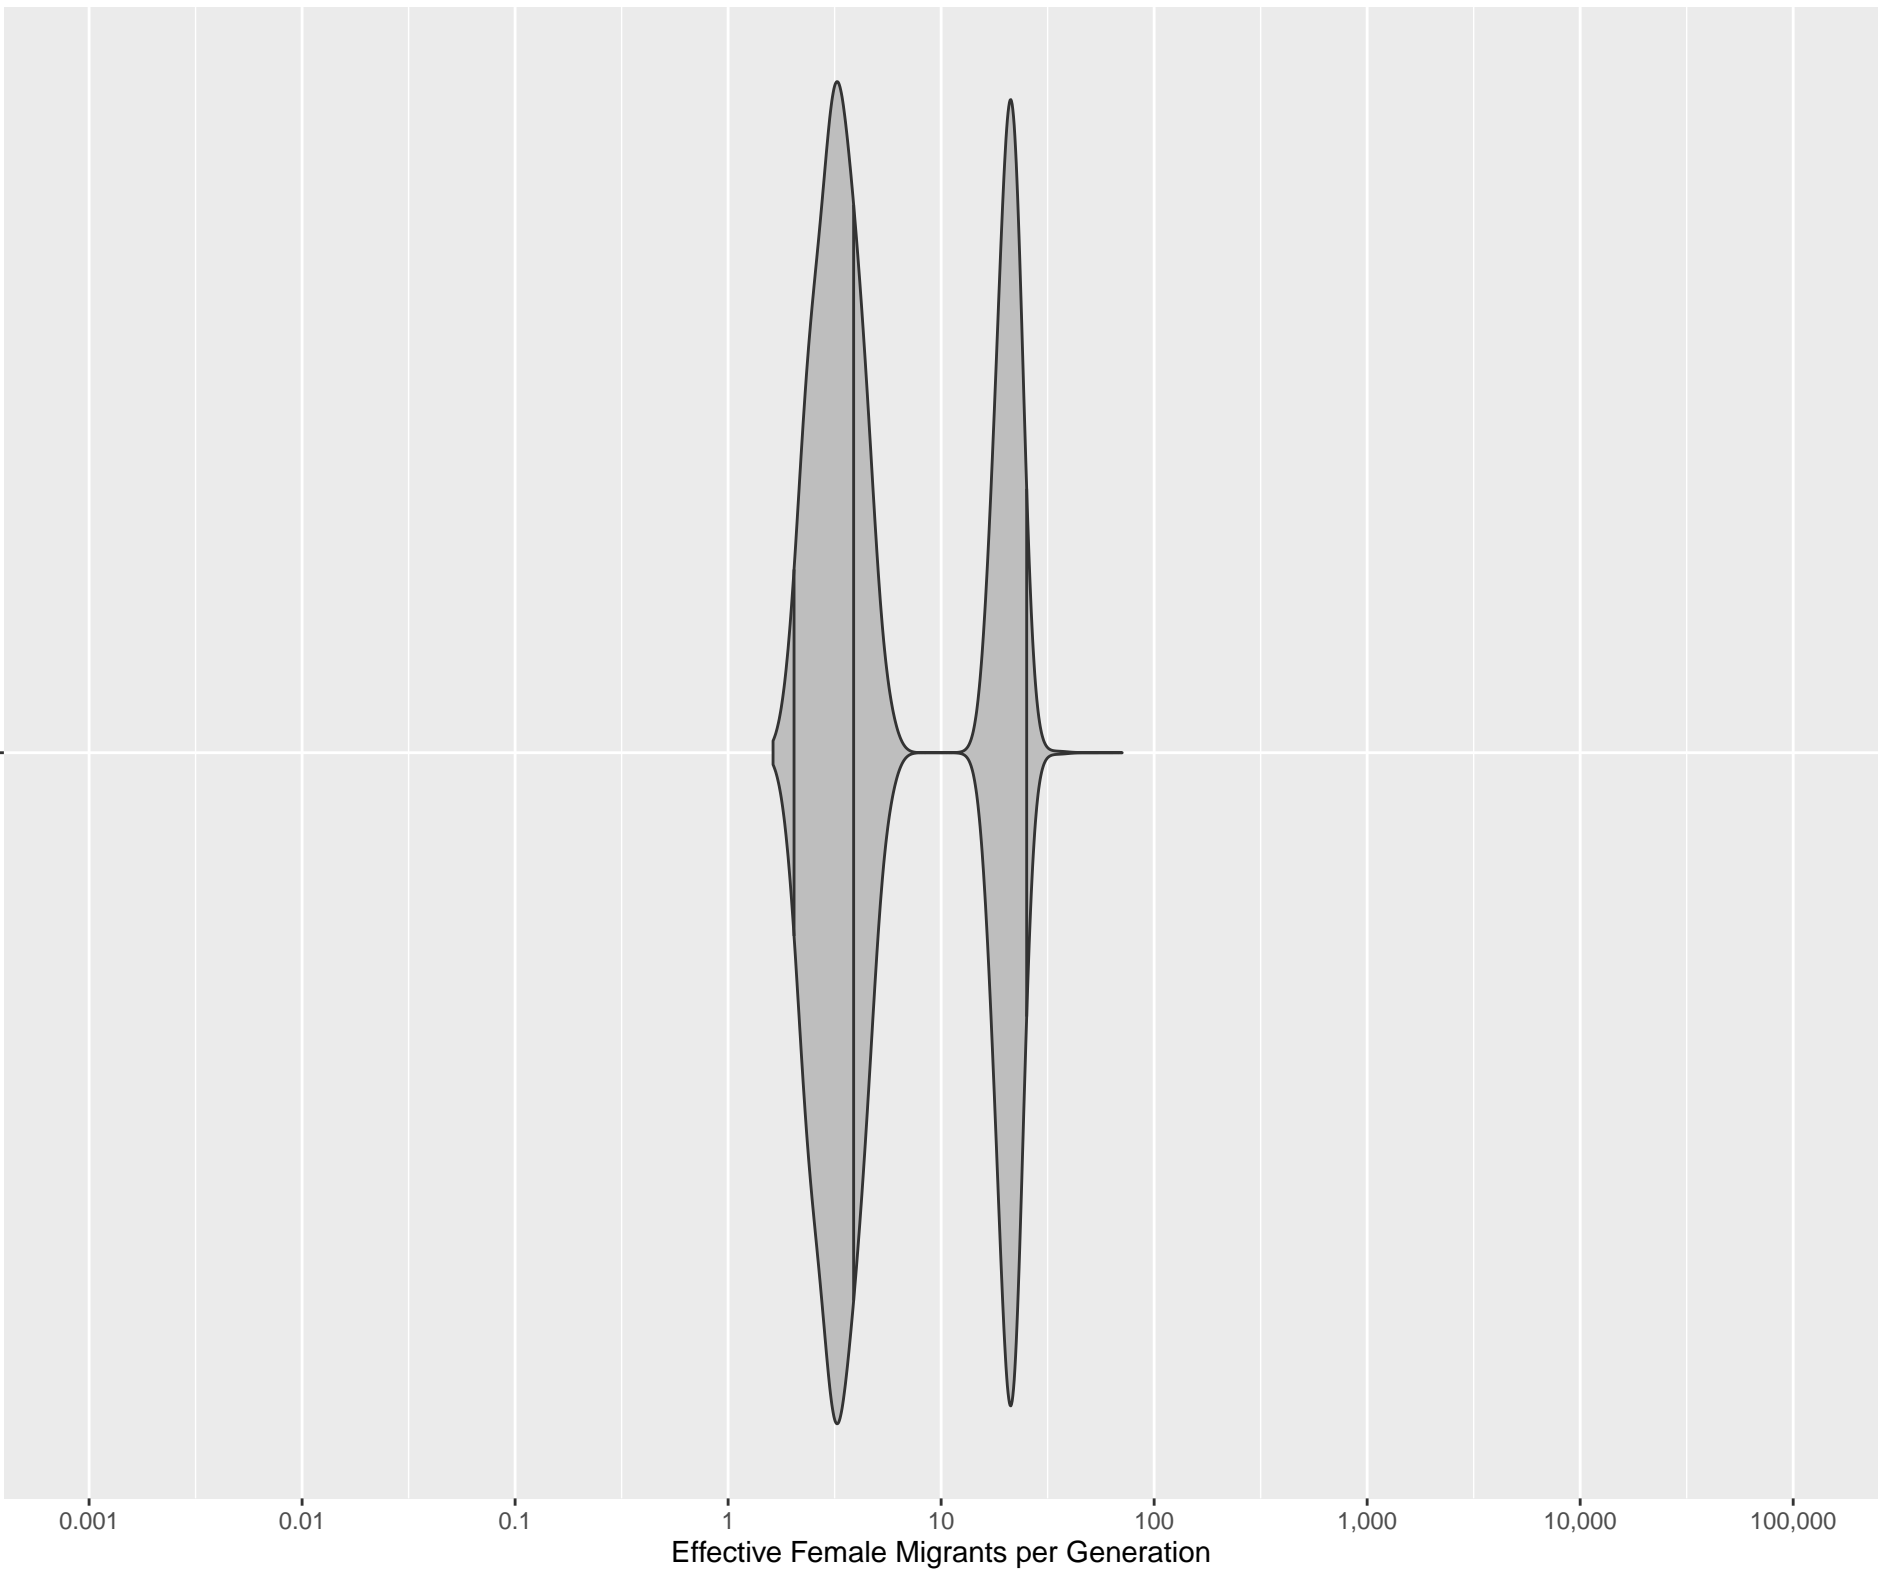

Ctenochaetus strigosus

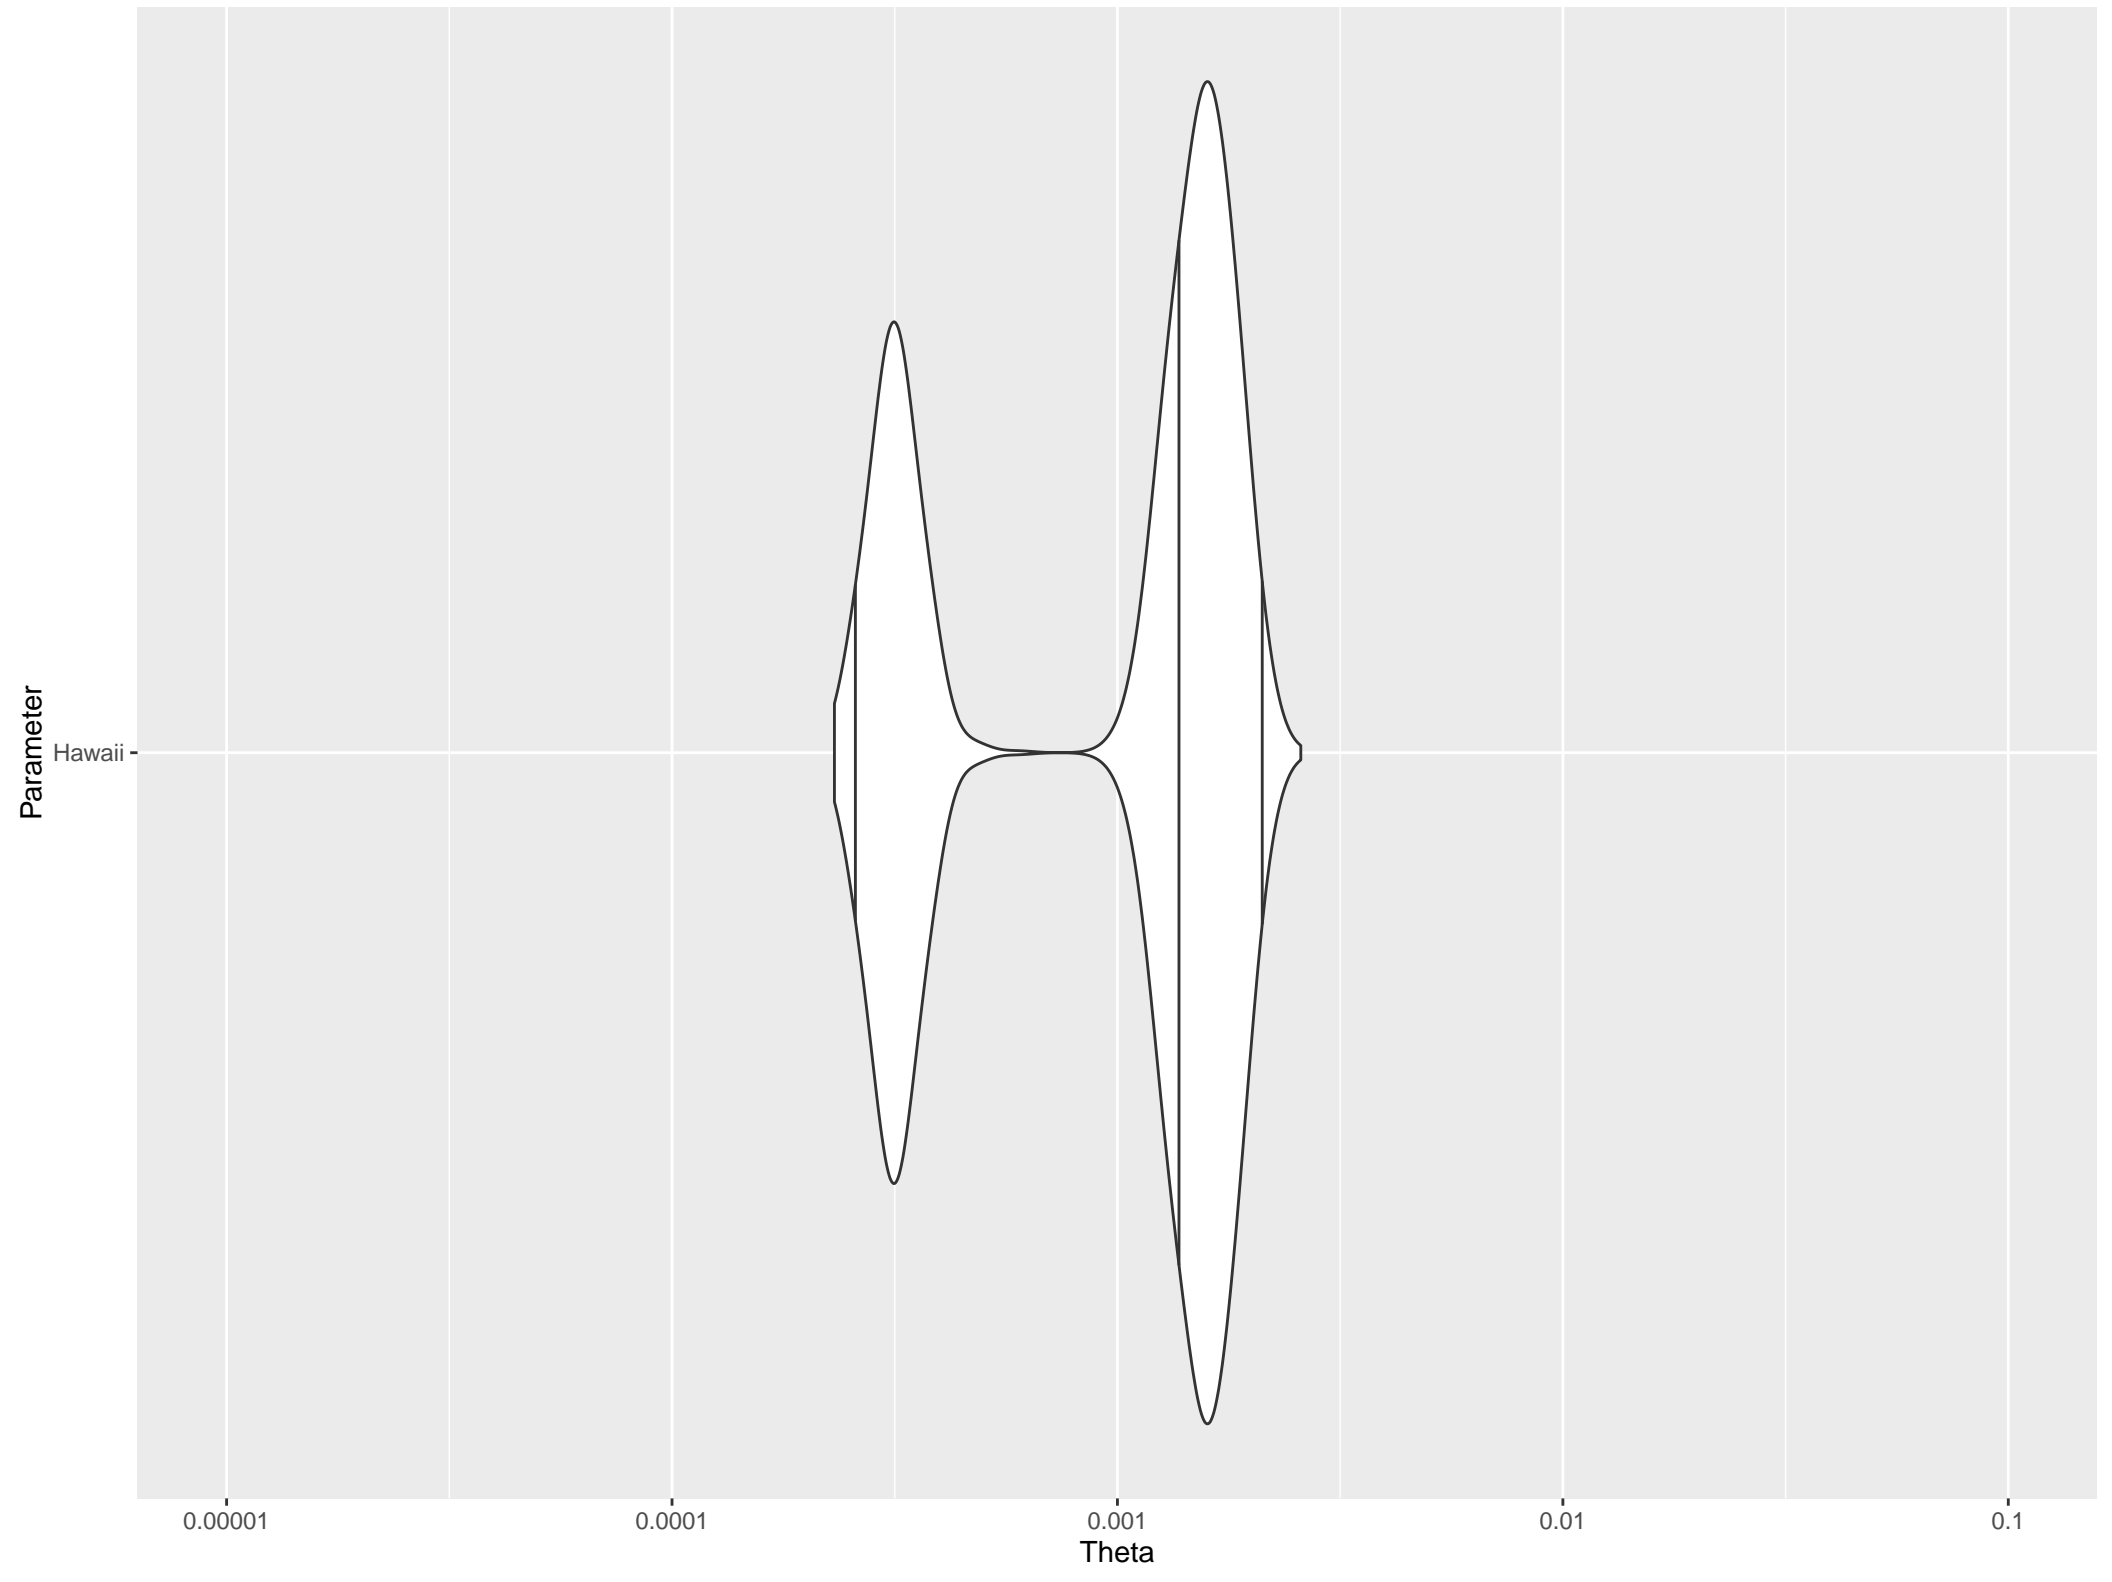

# Etelis marshi

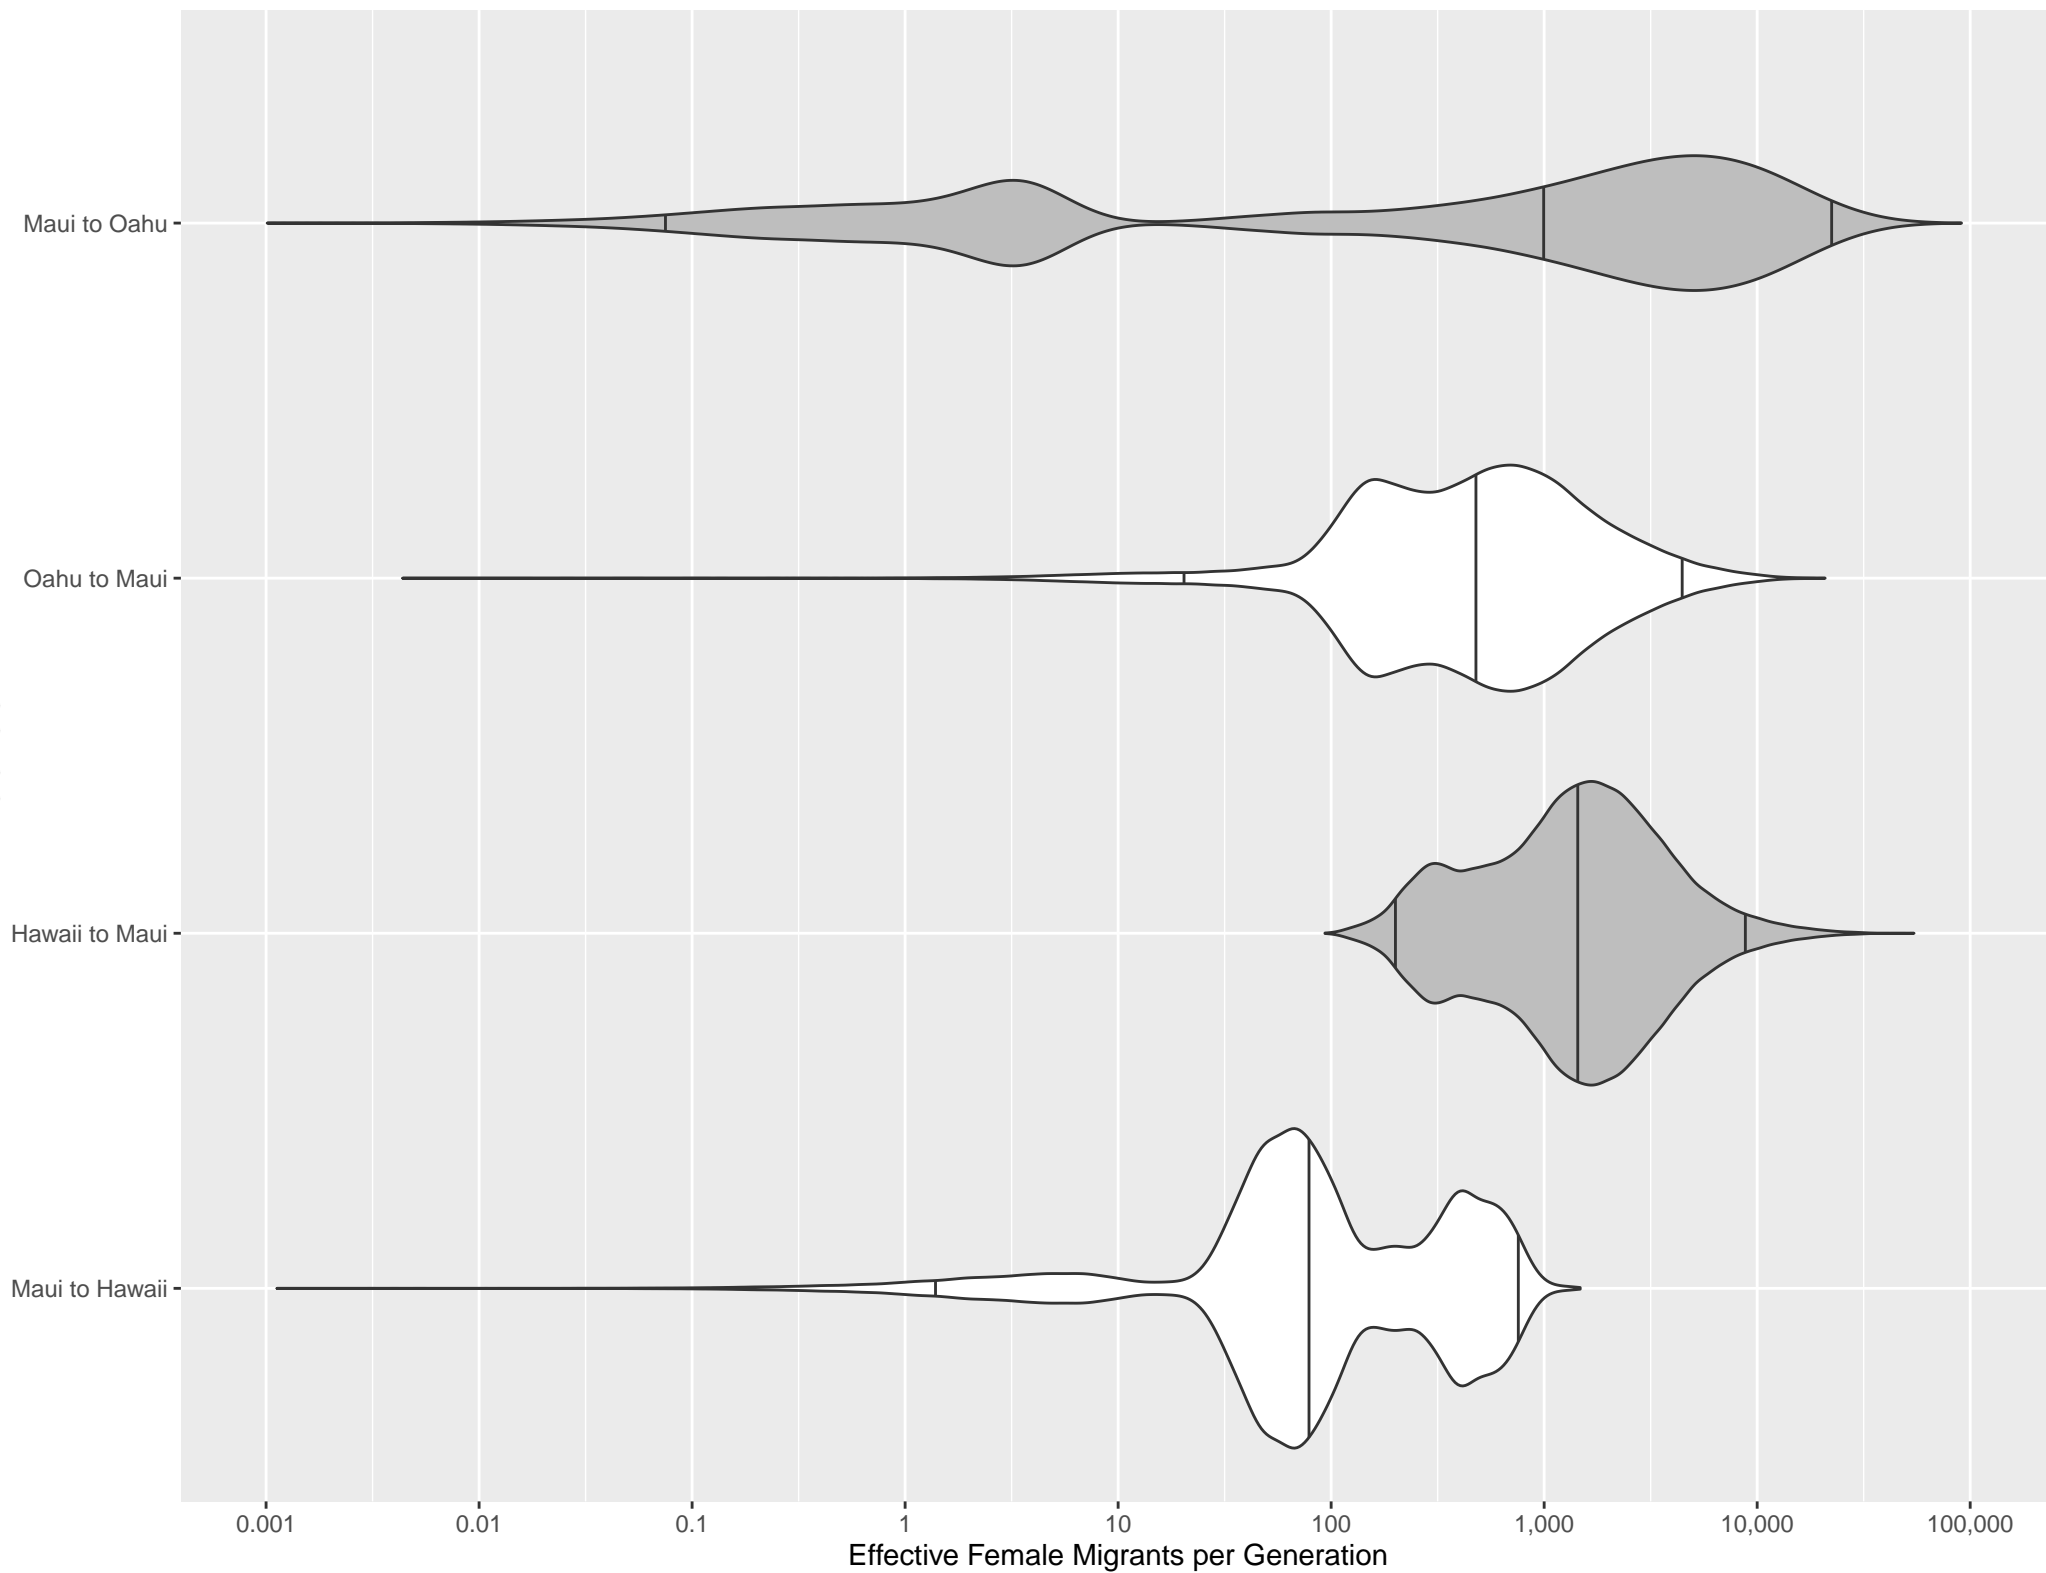

# Etelis marshi

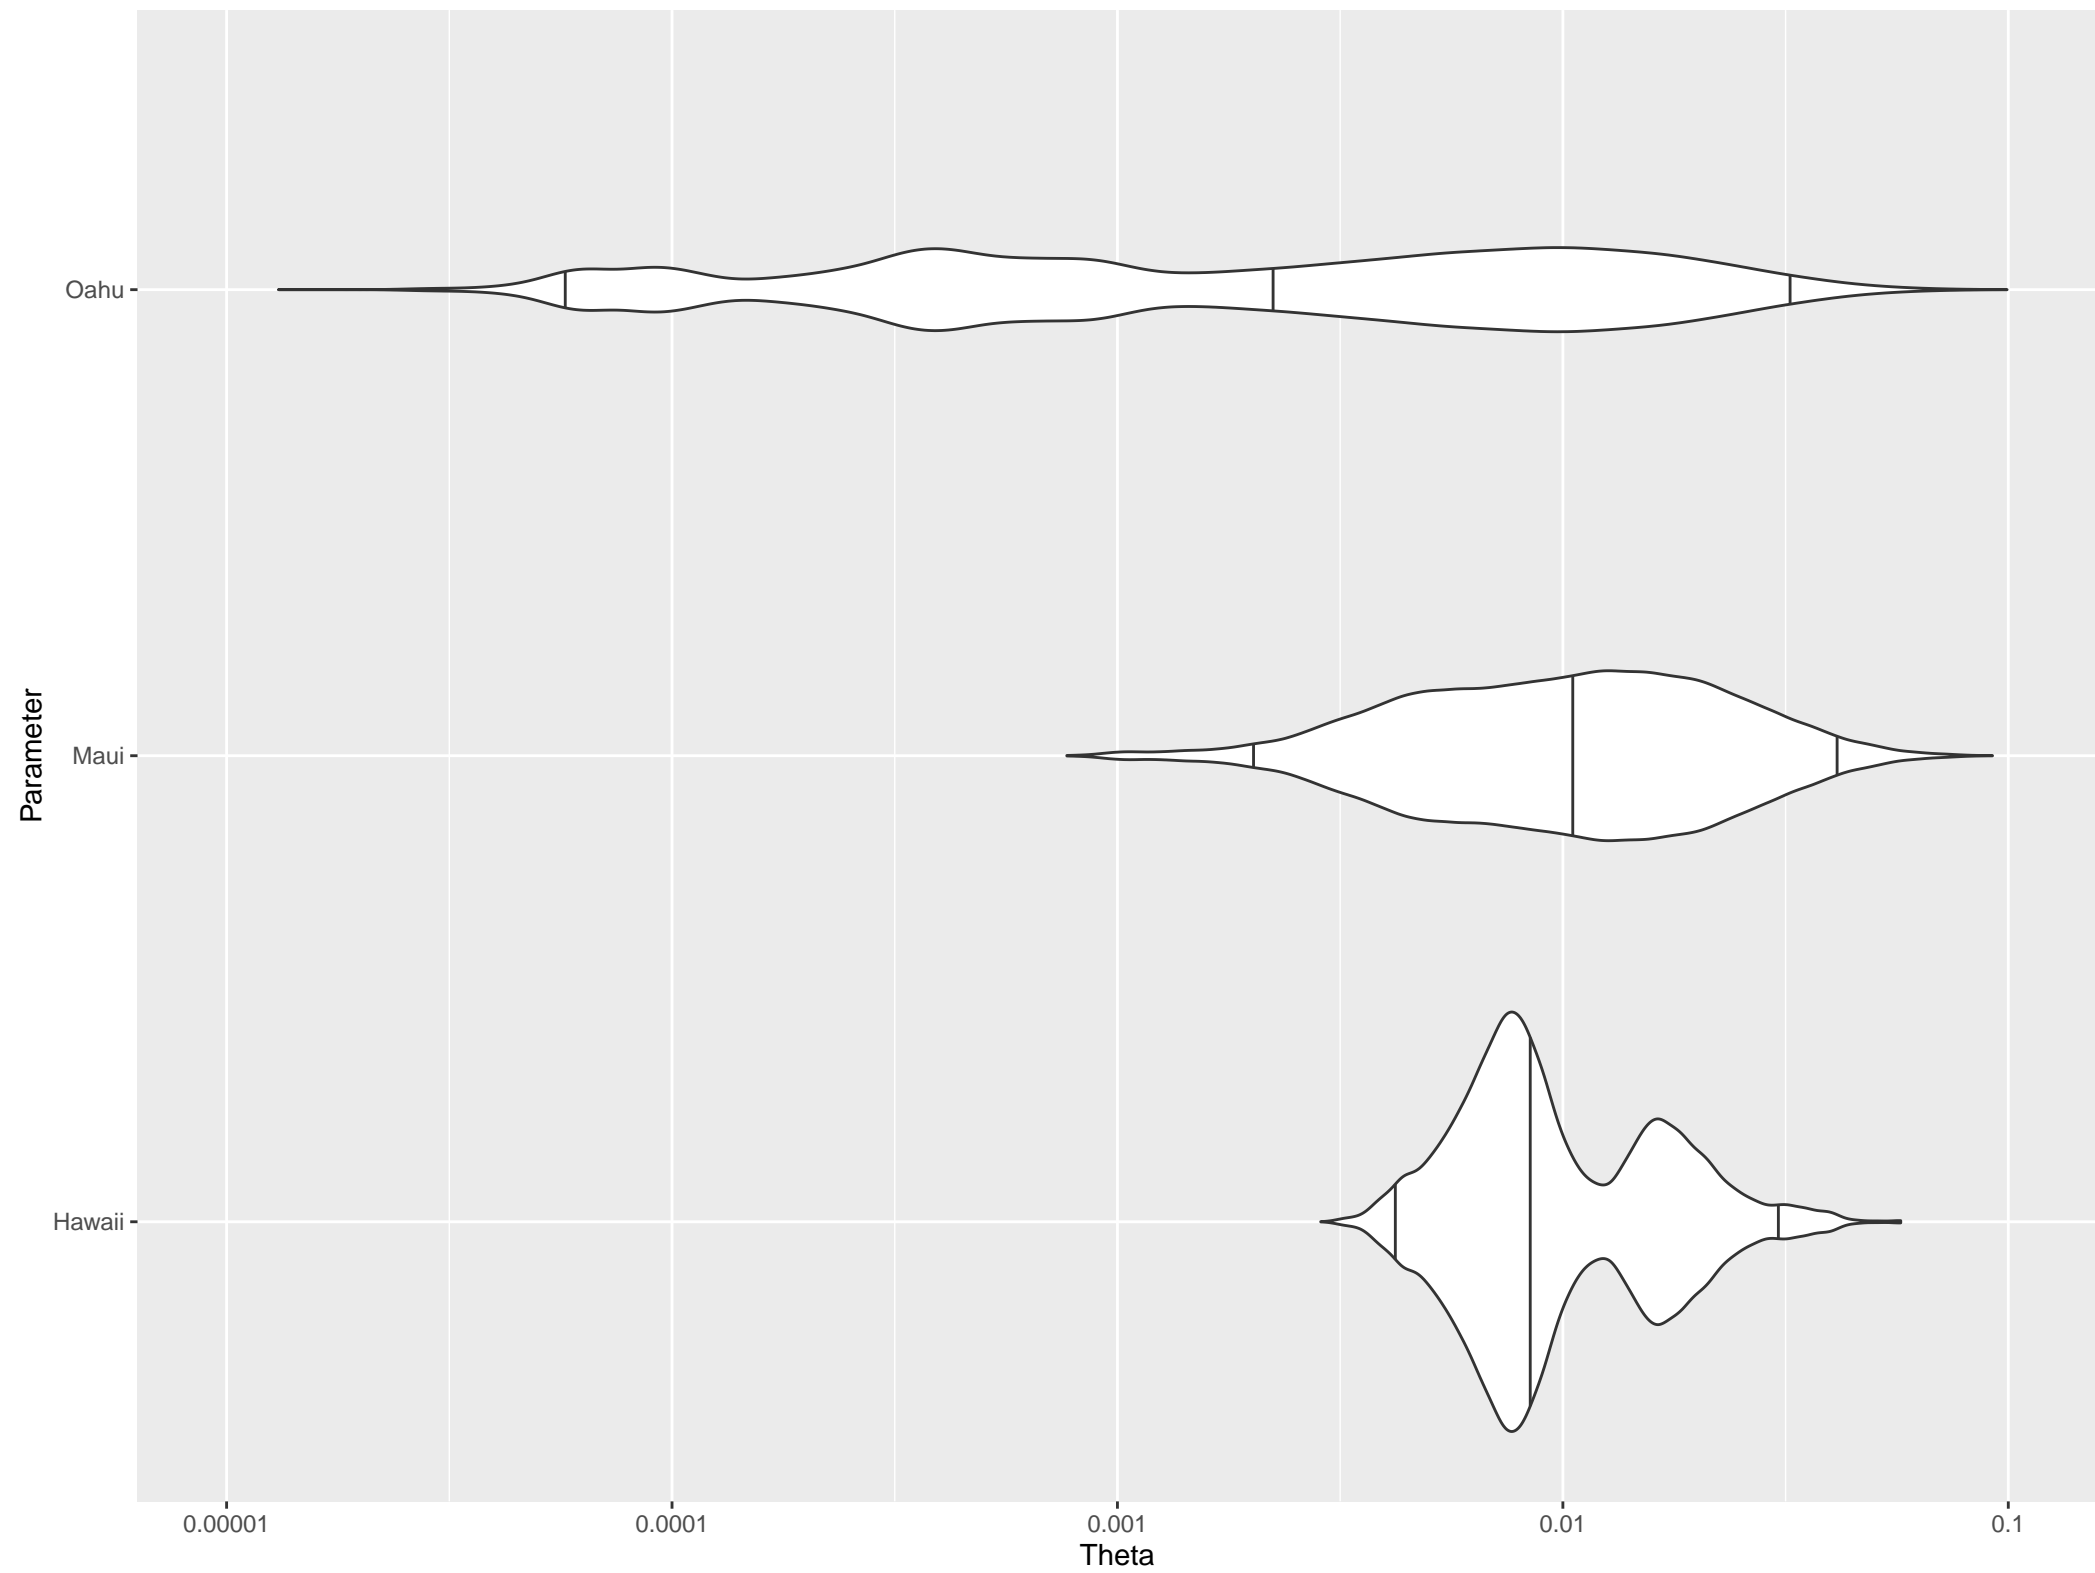

*Gymnothorax flavimarginatus*

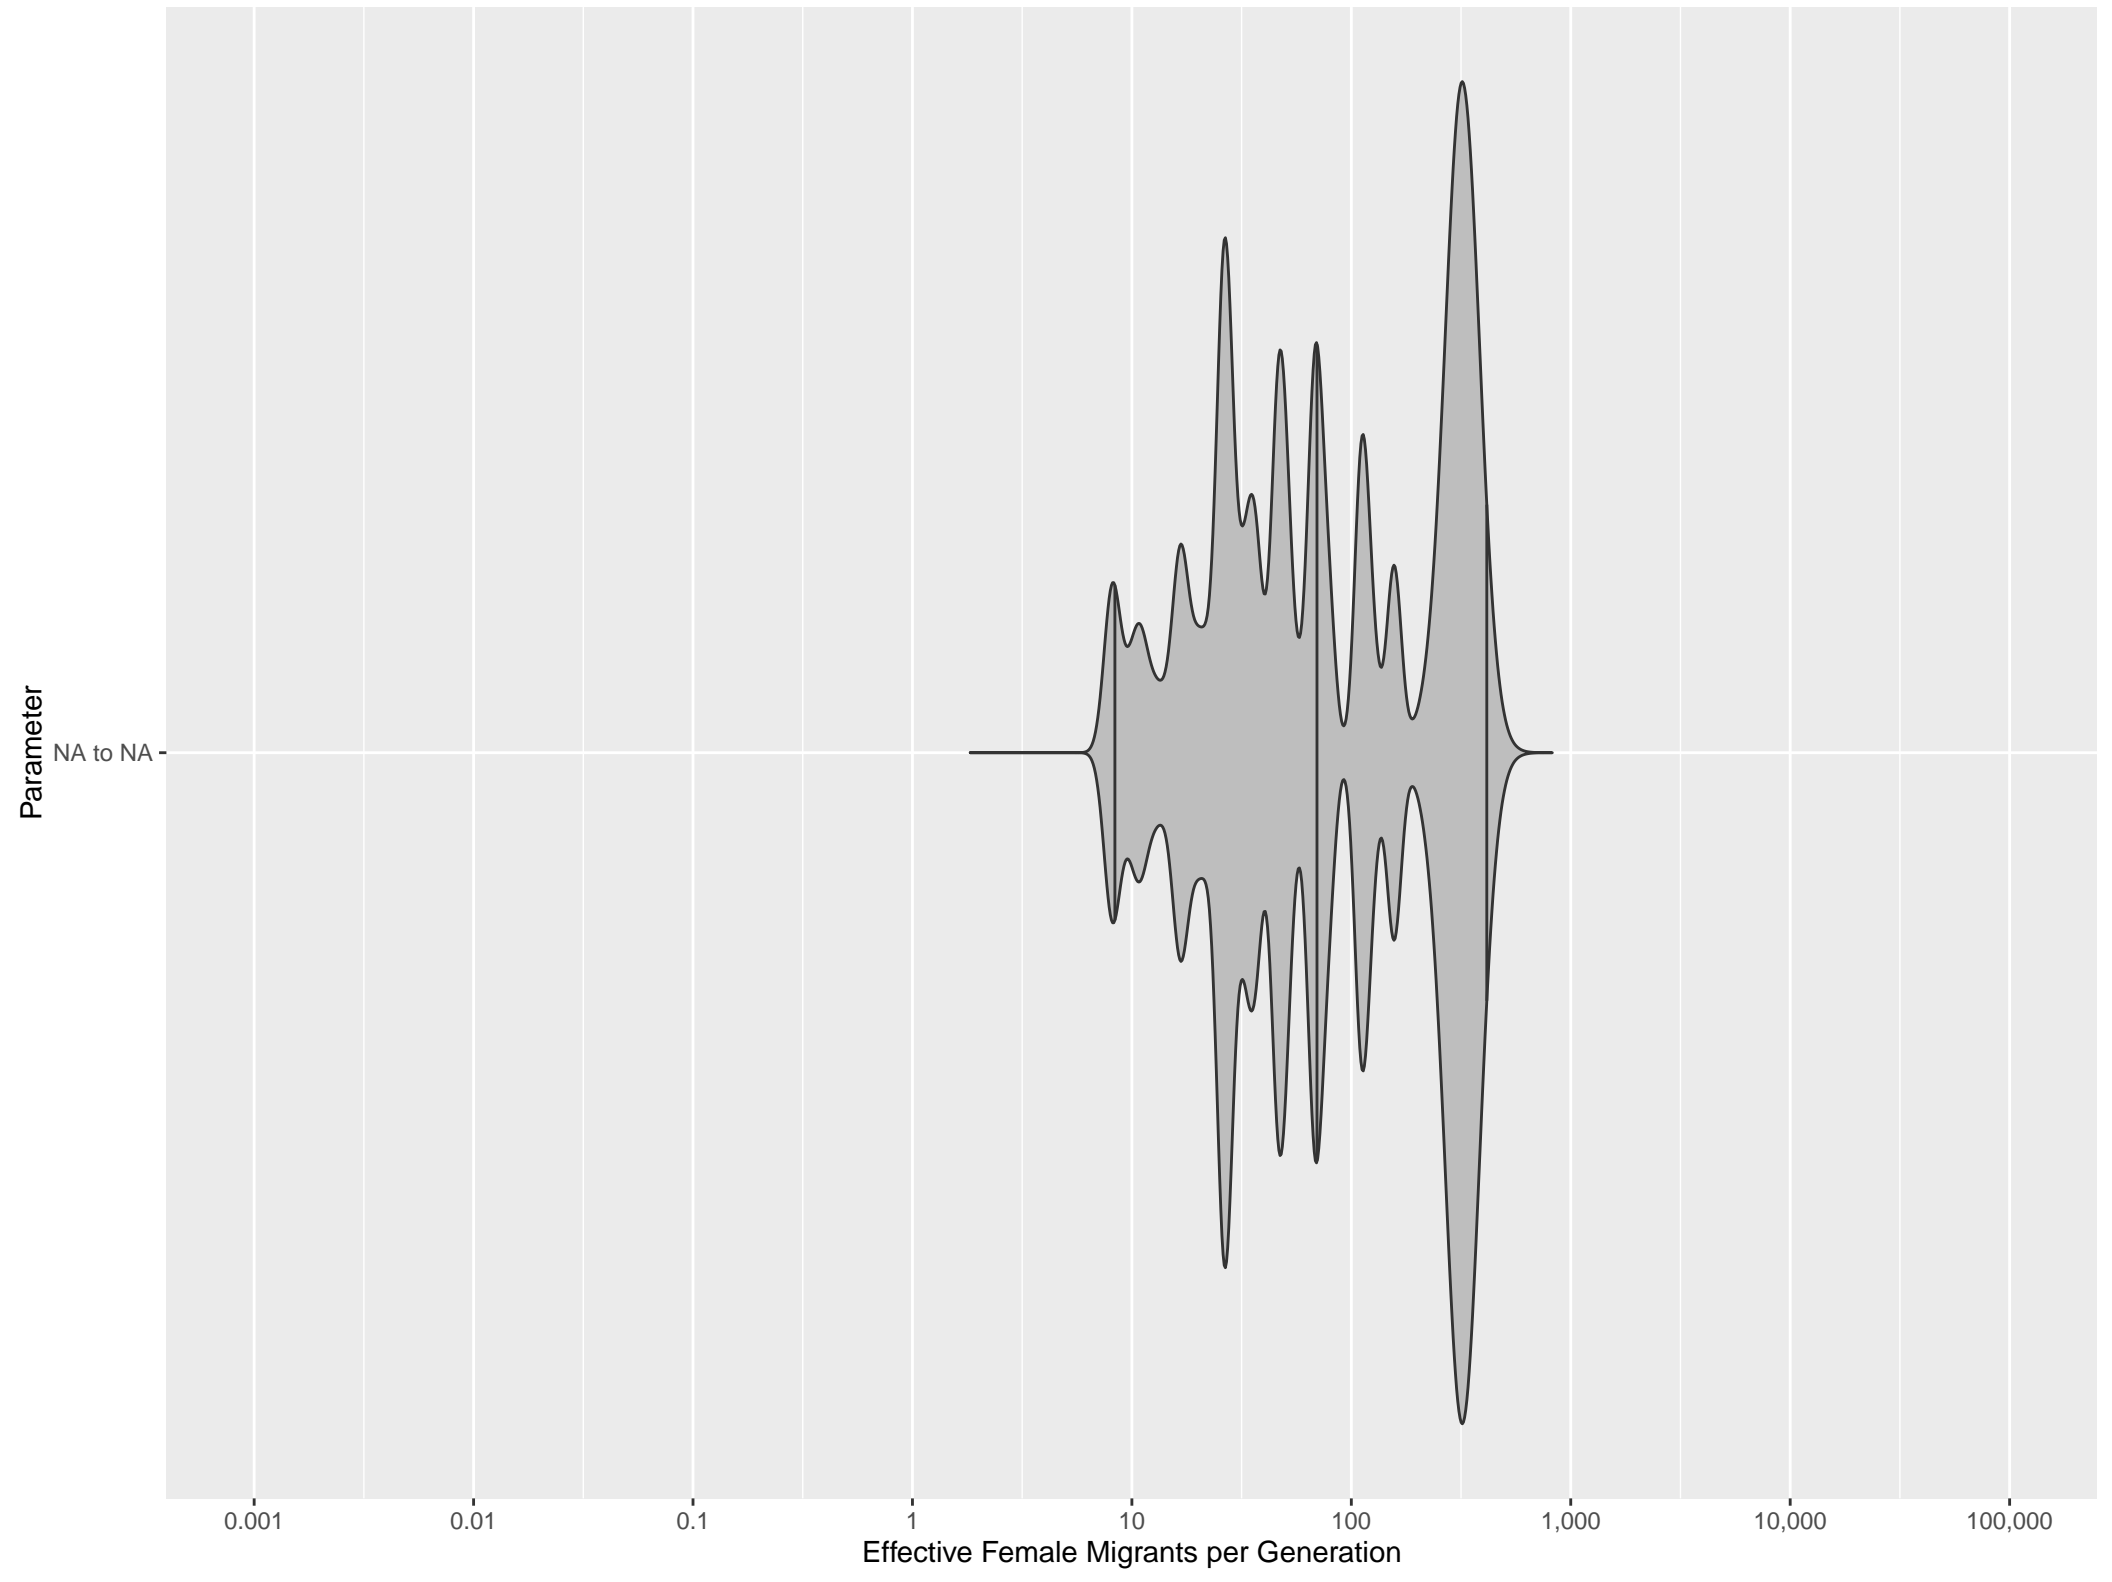

Gymnothorax flavimarginatus

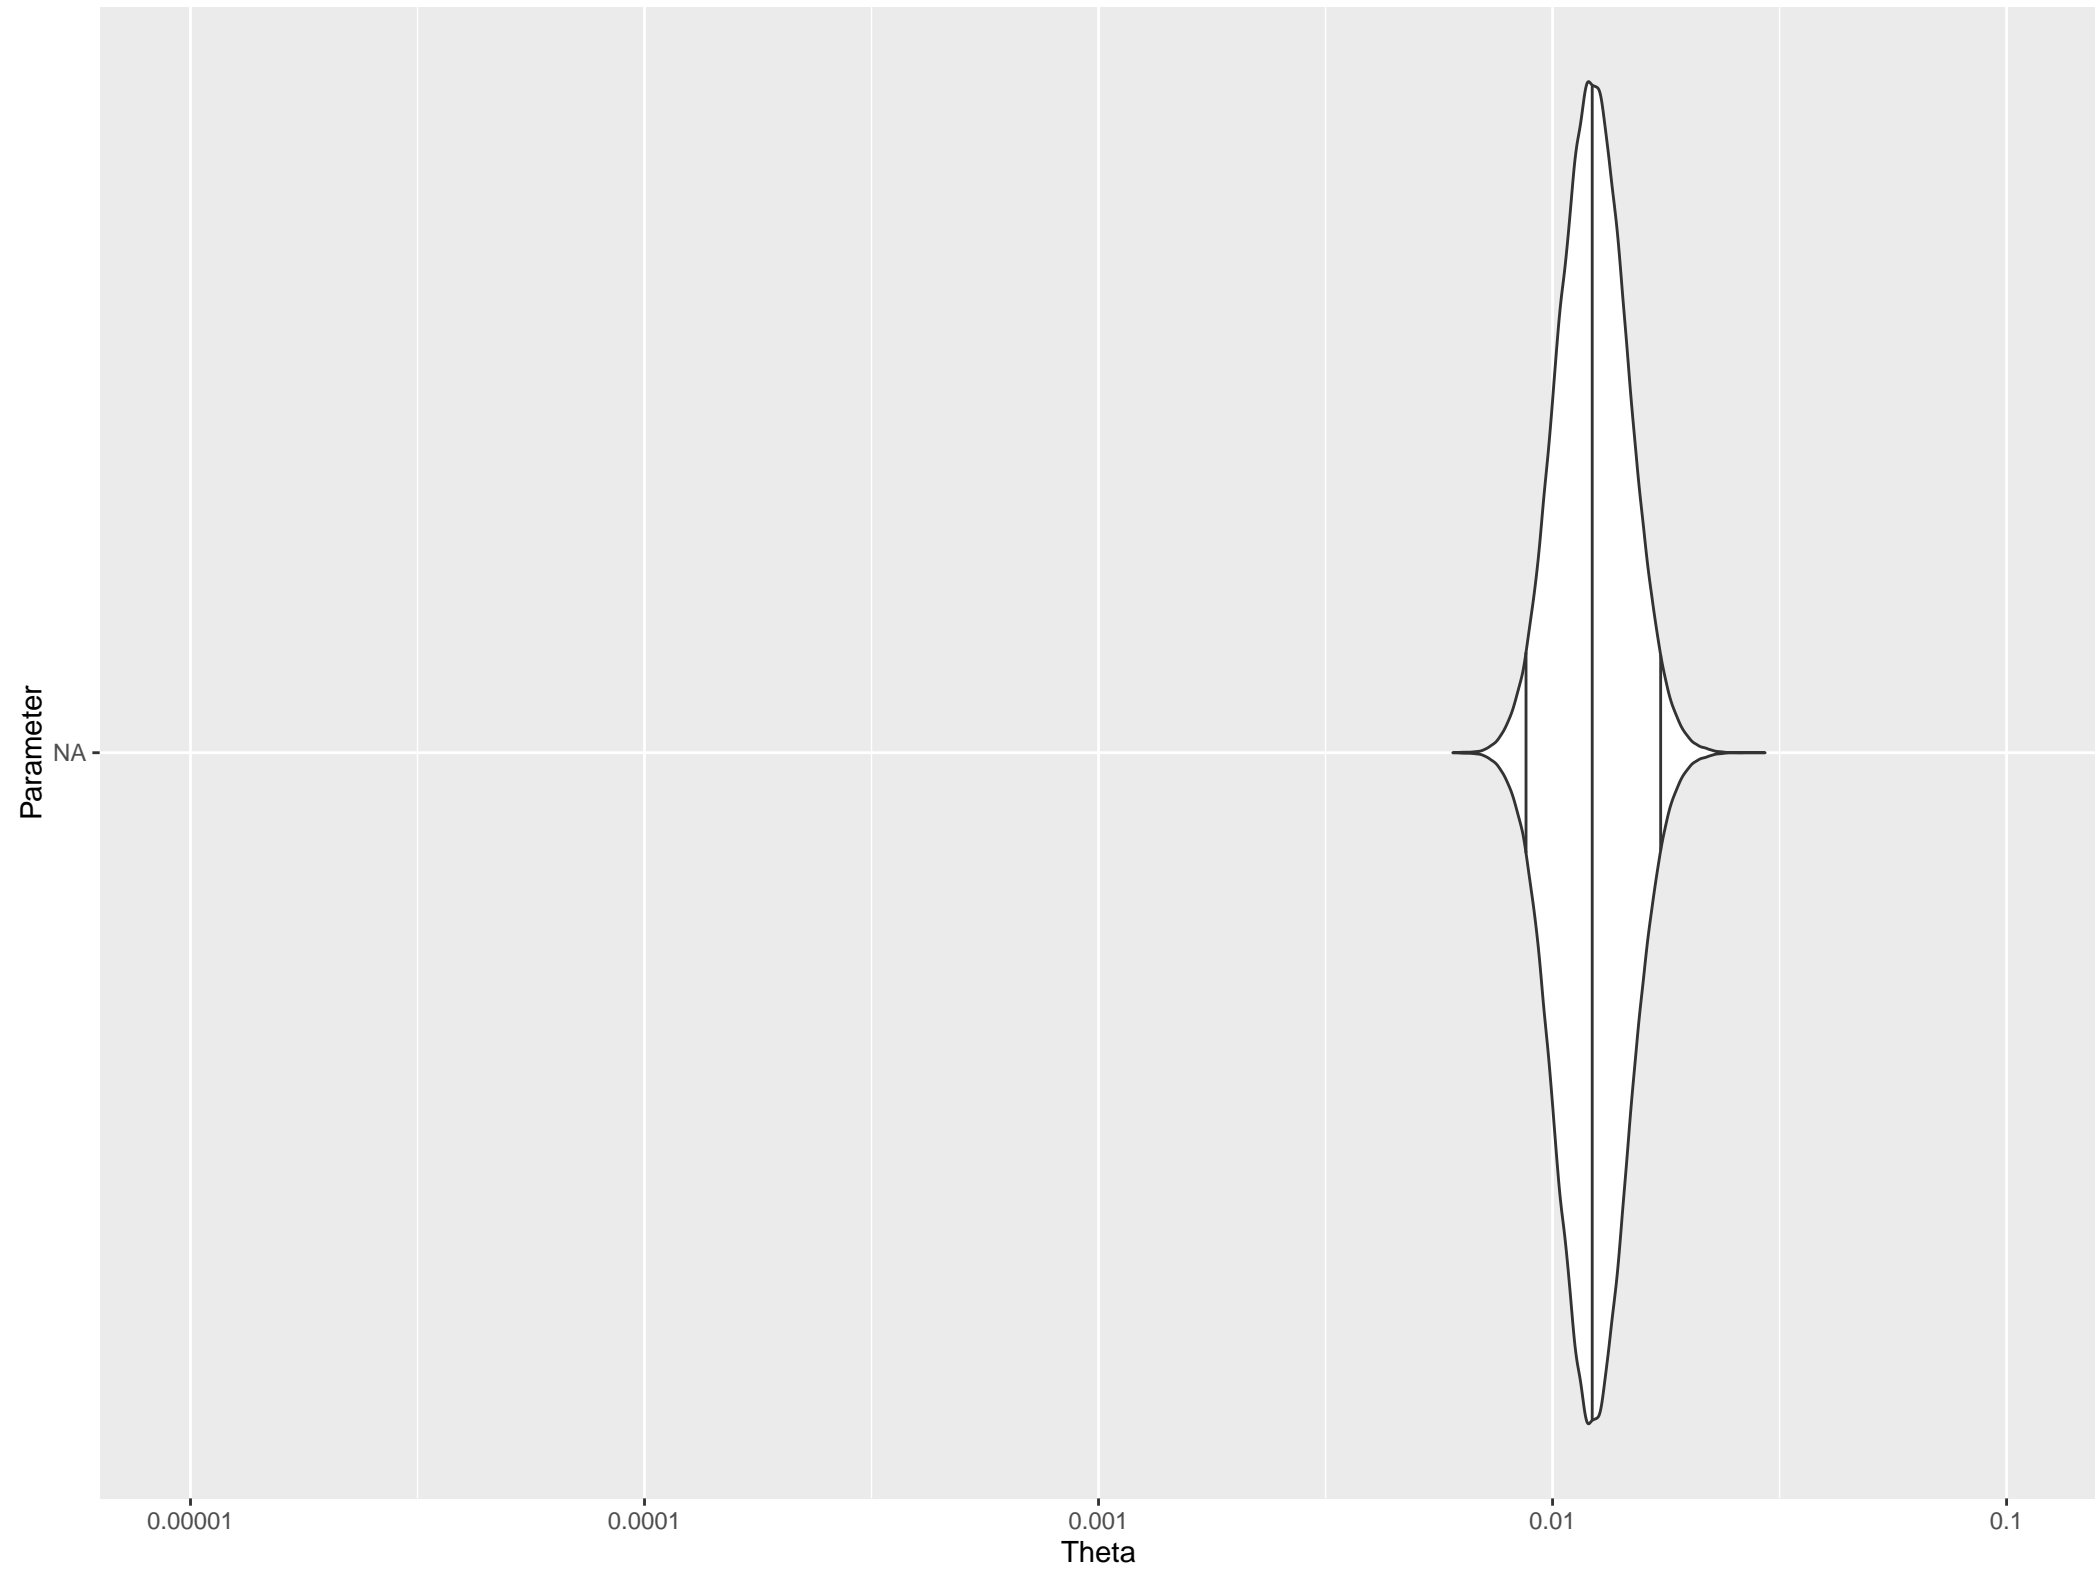

# Halichoeres ornatissimus

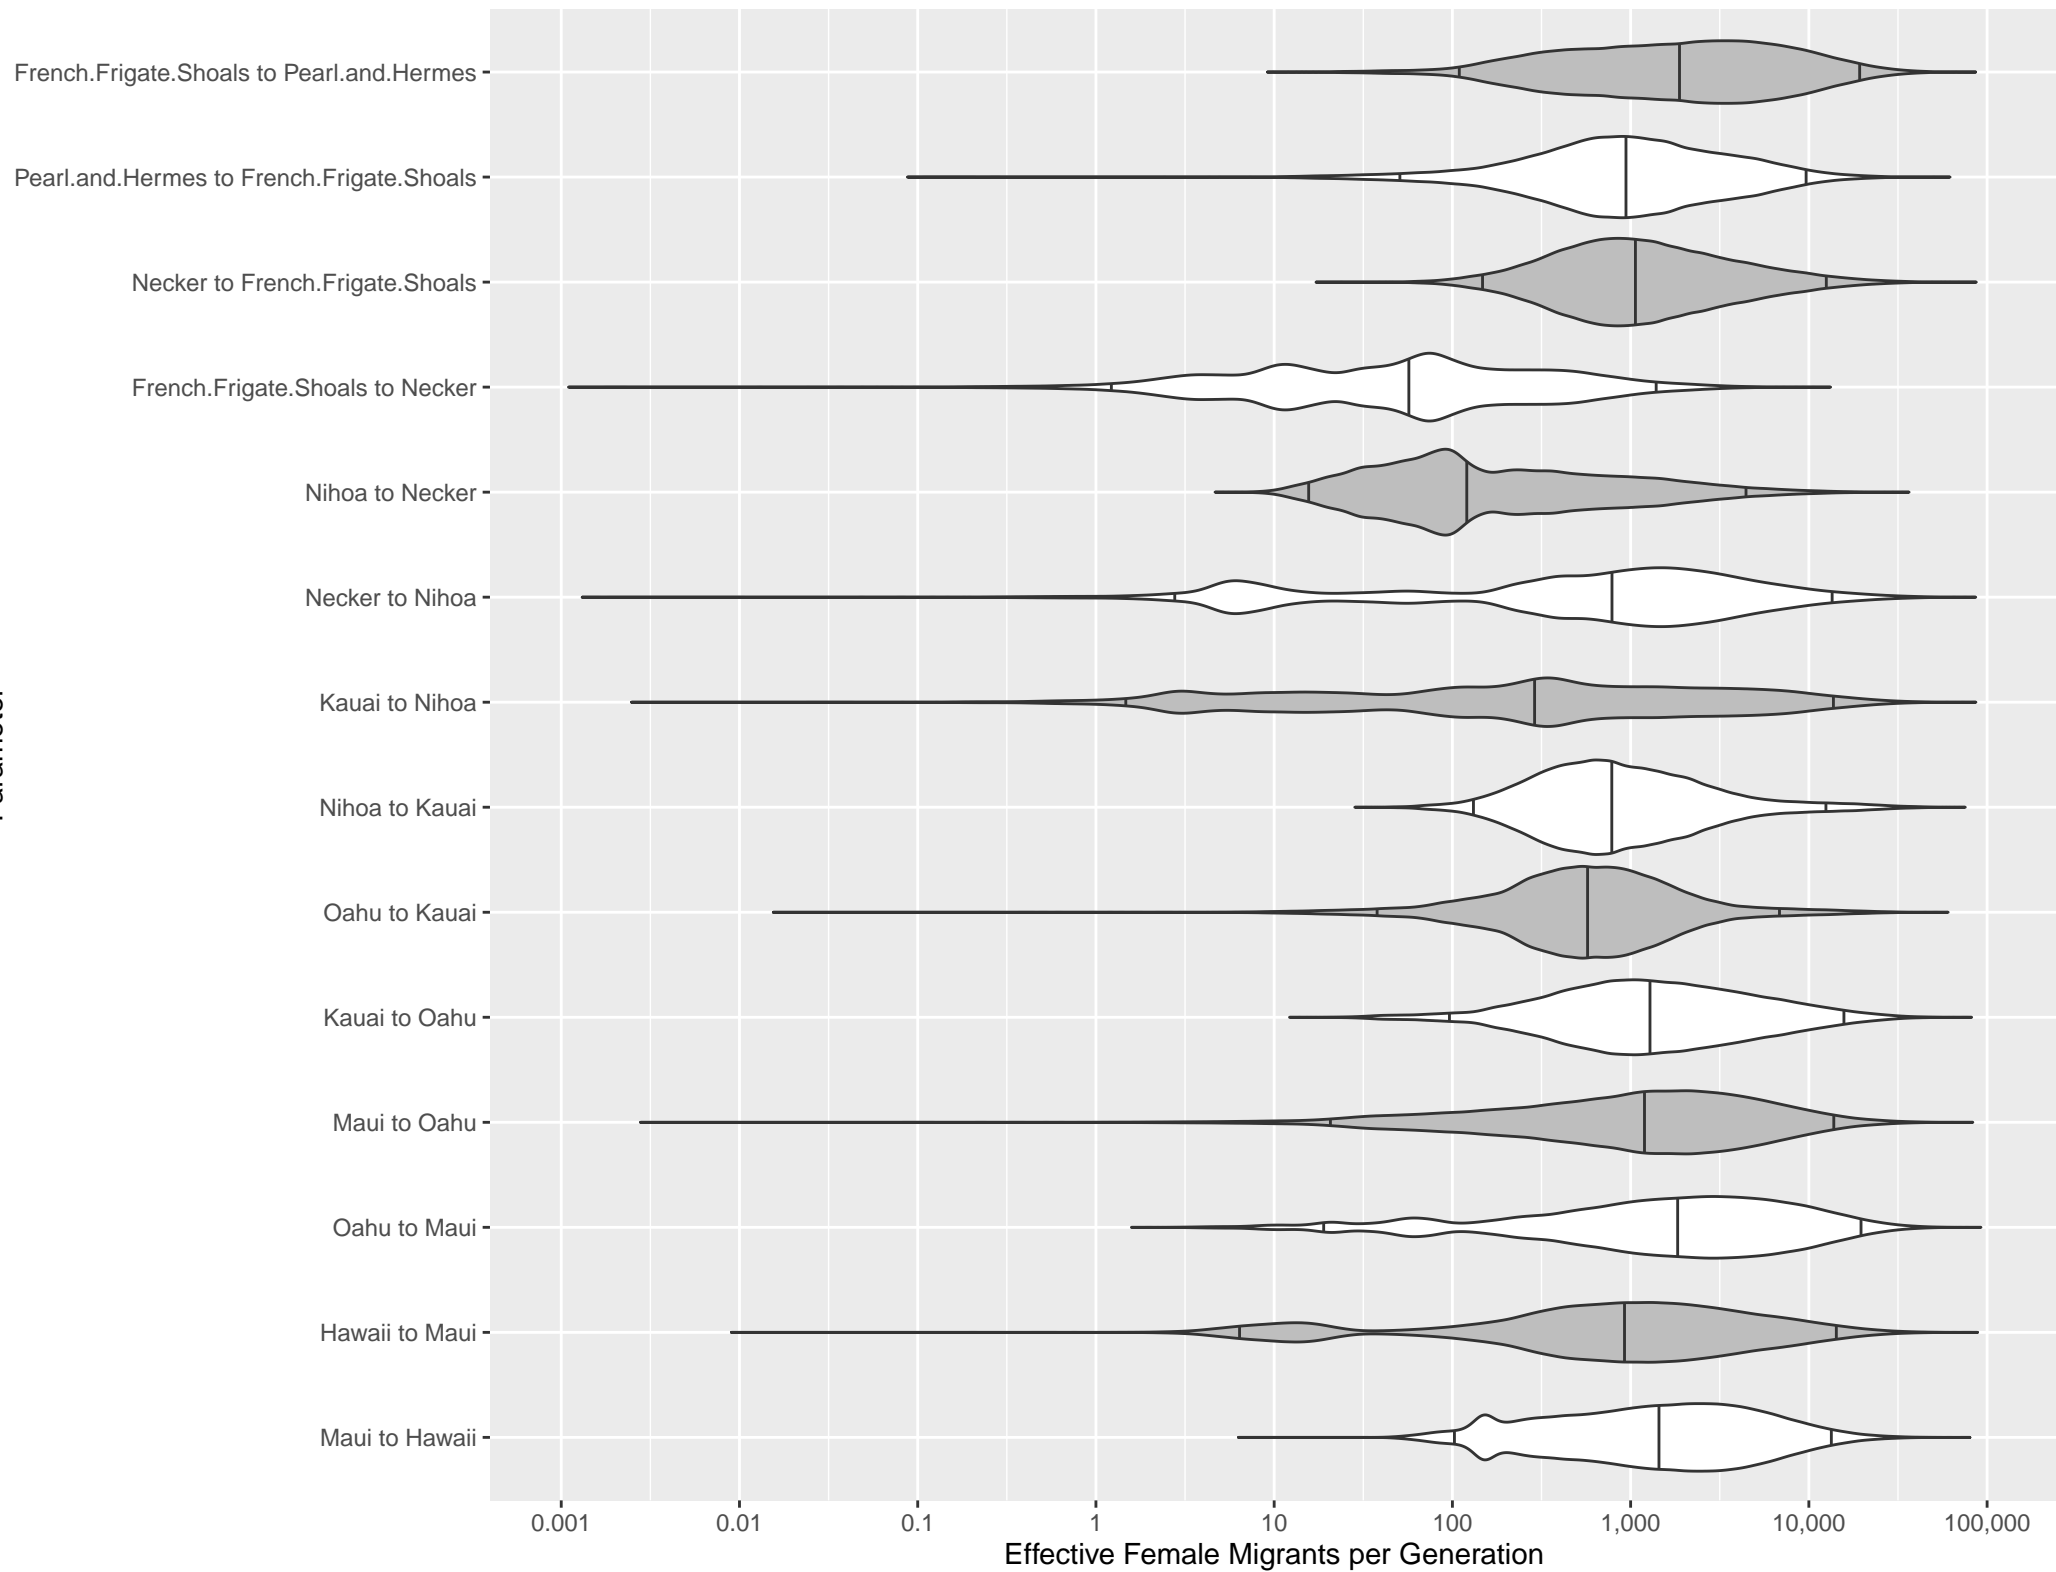

# Halichoeres ornatissimus

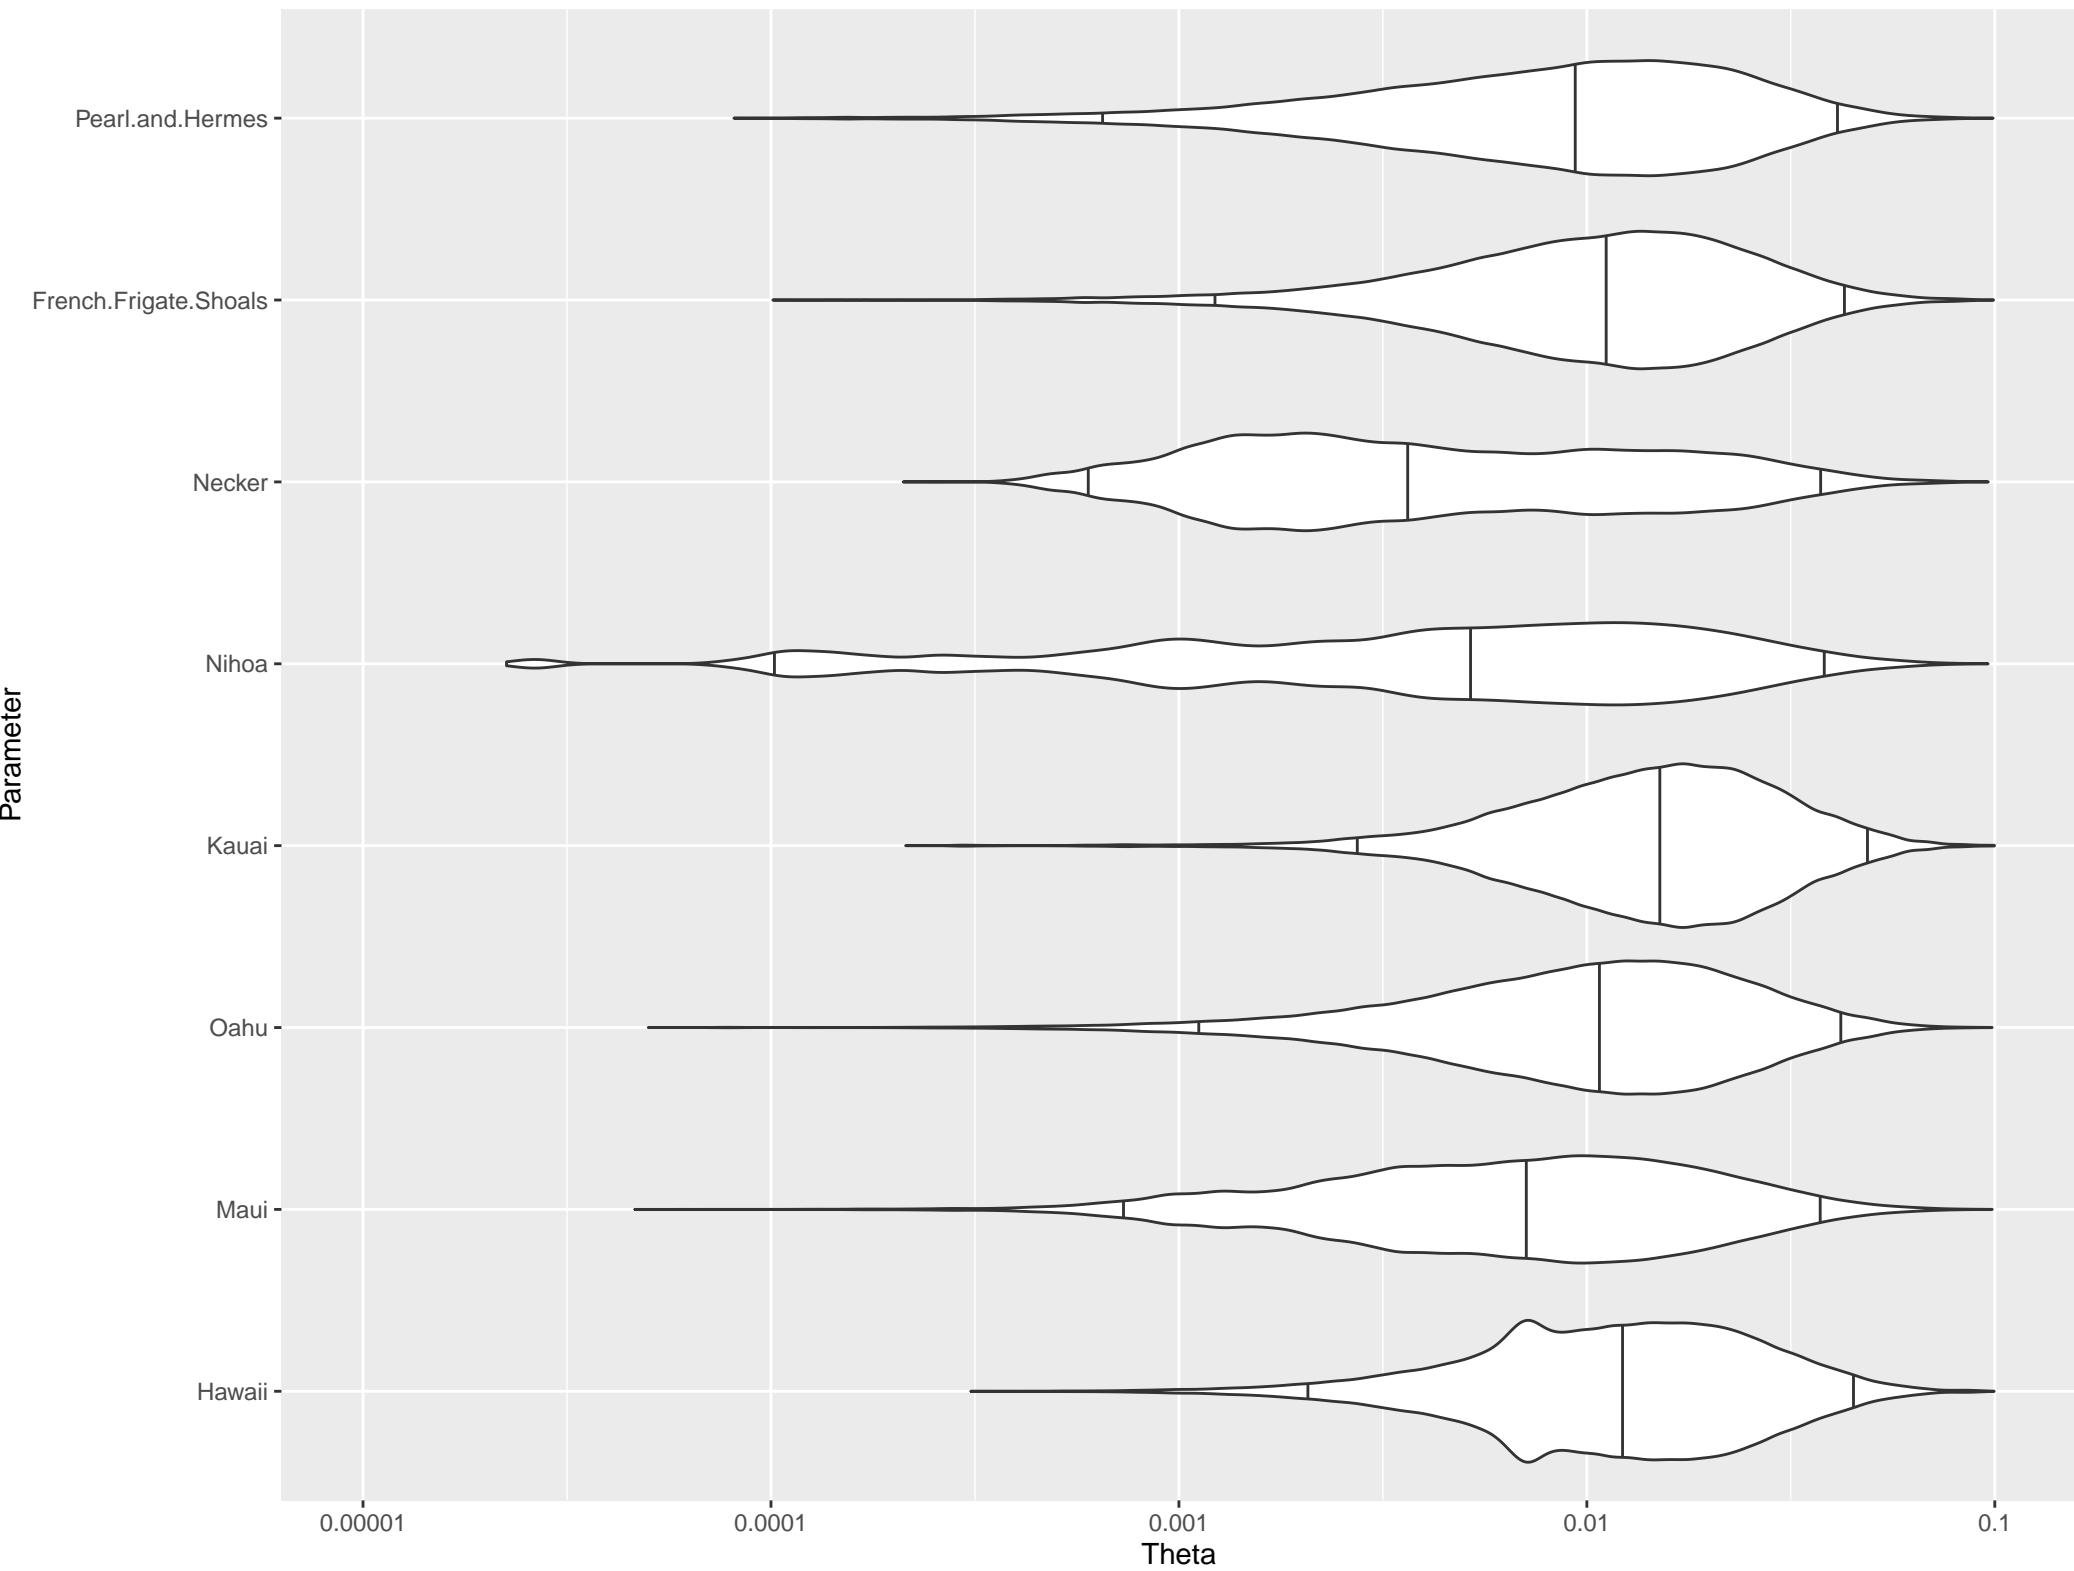



# Heterocentrotus mammillatus

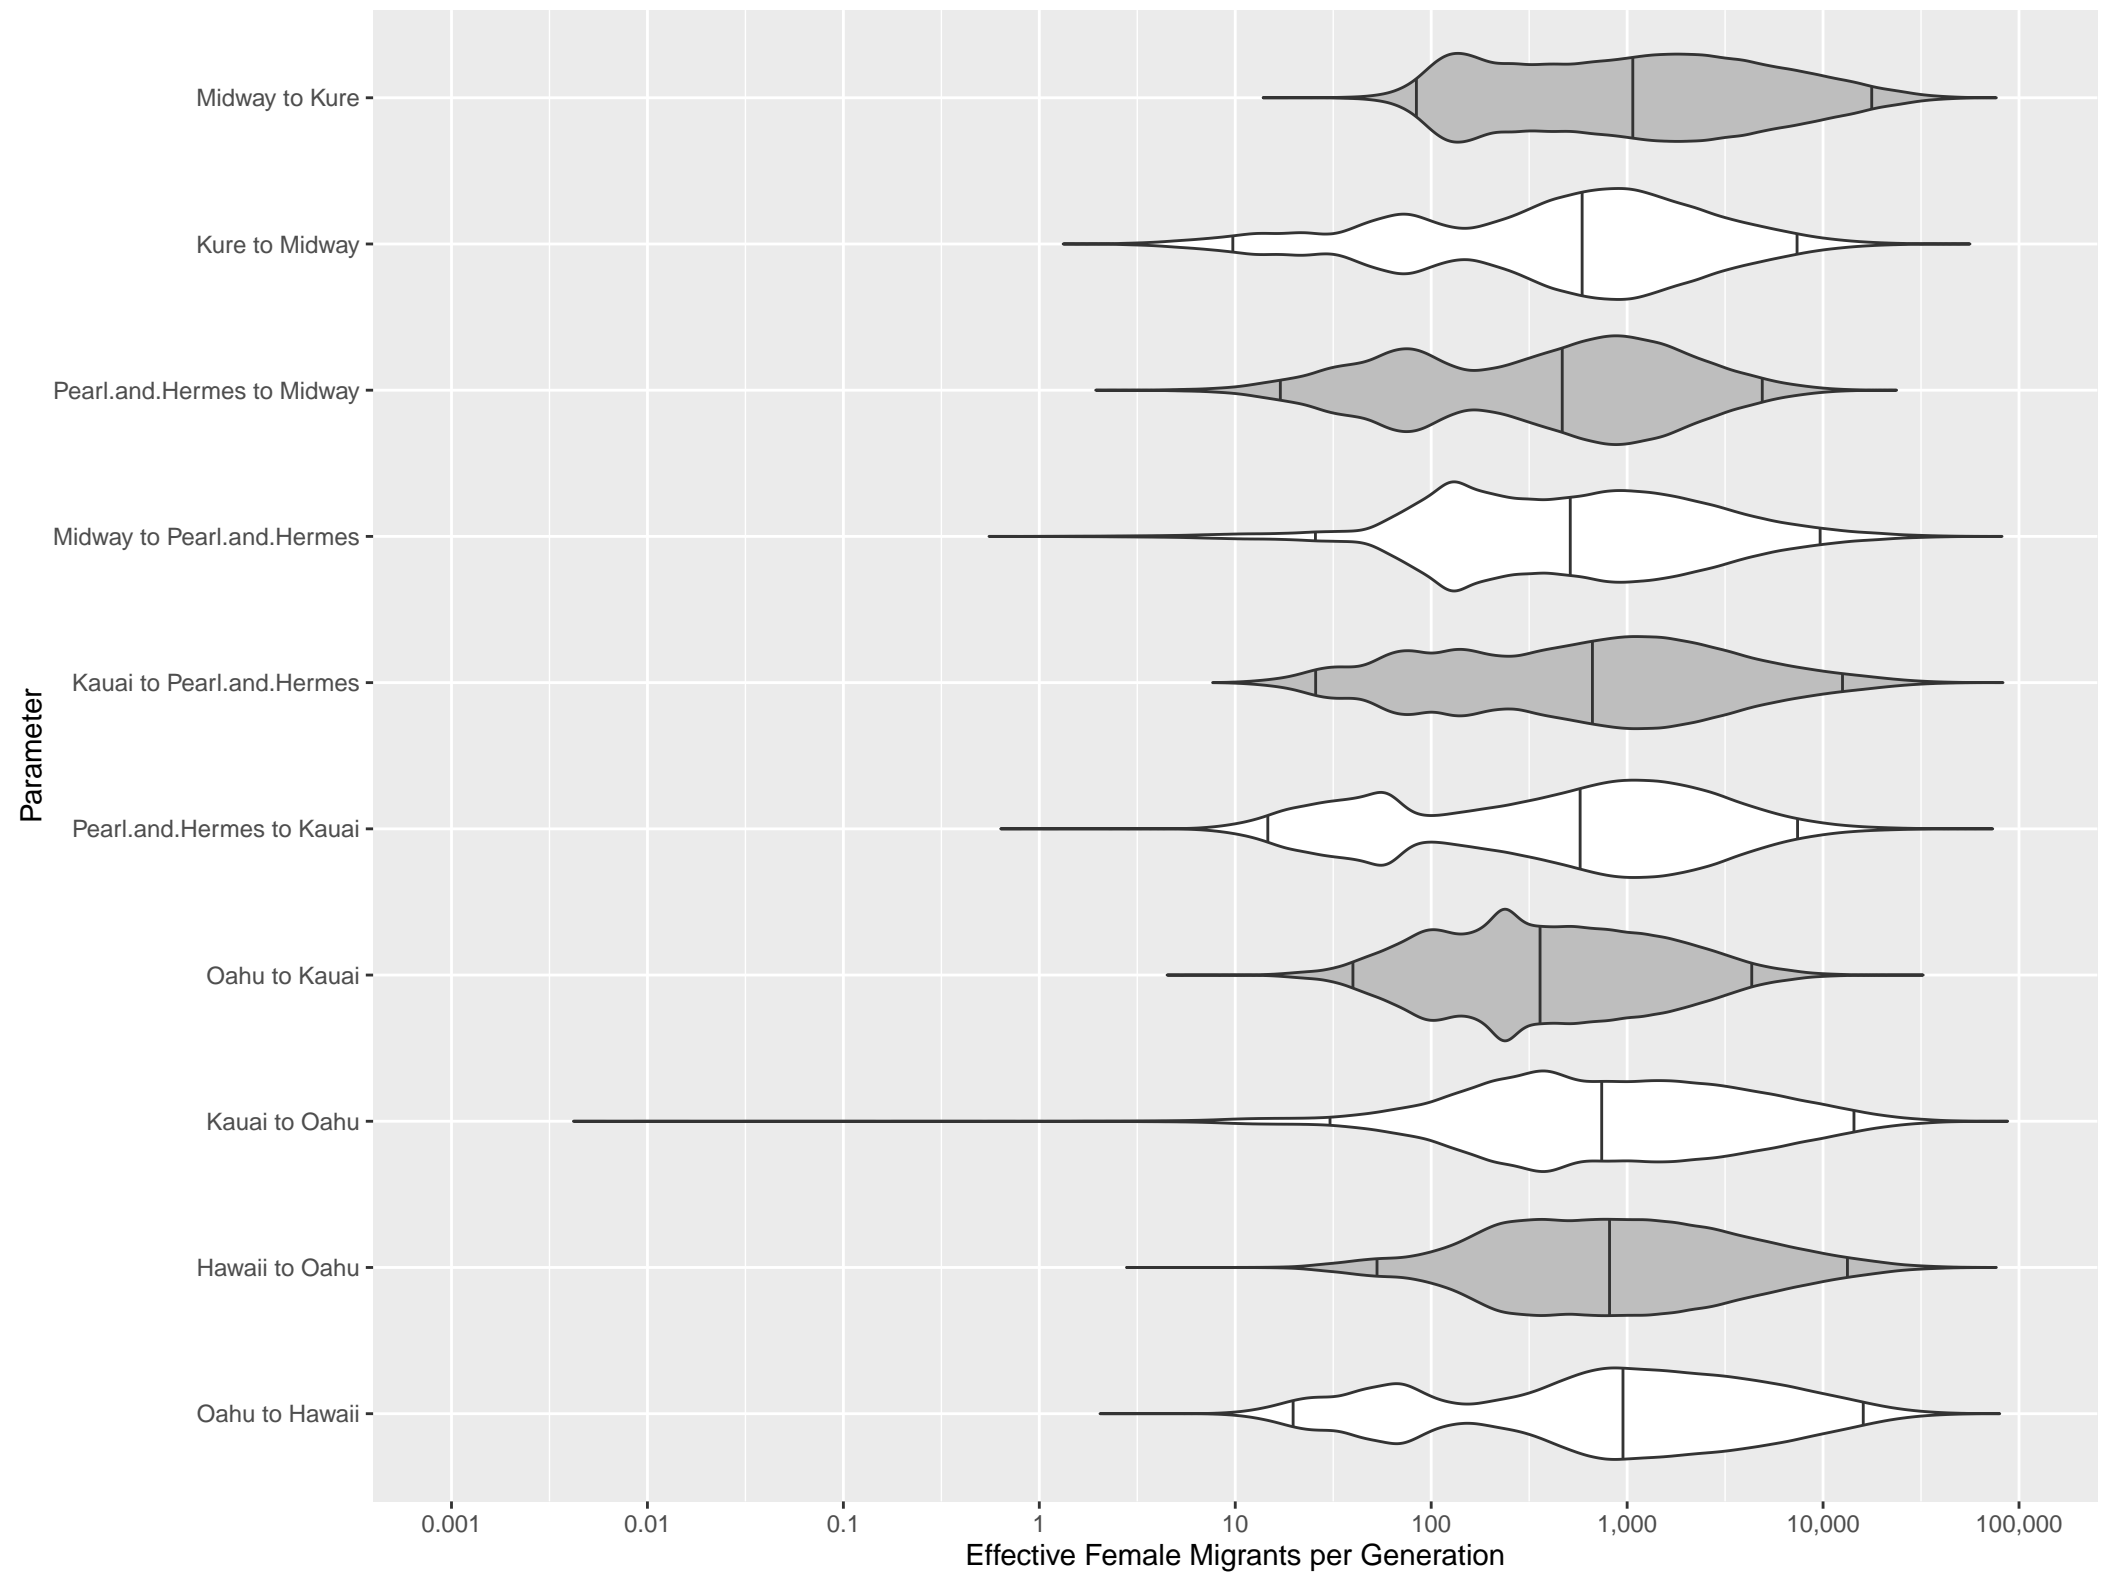

# Heterocentrotus mammillatus

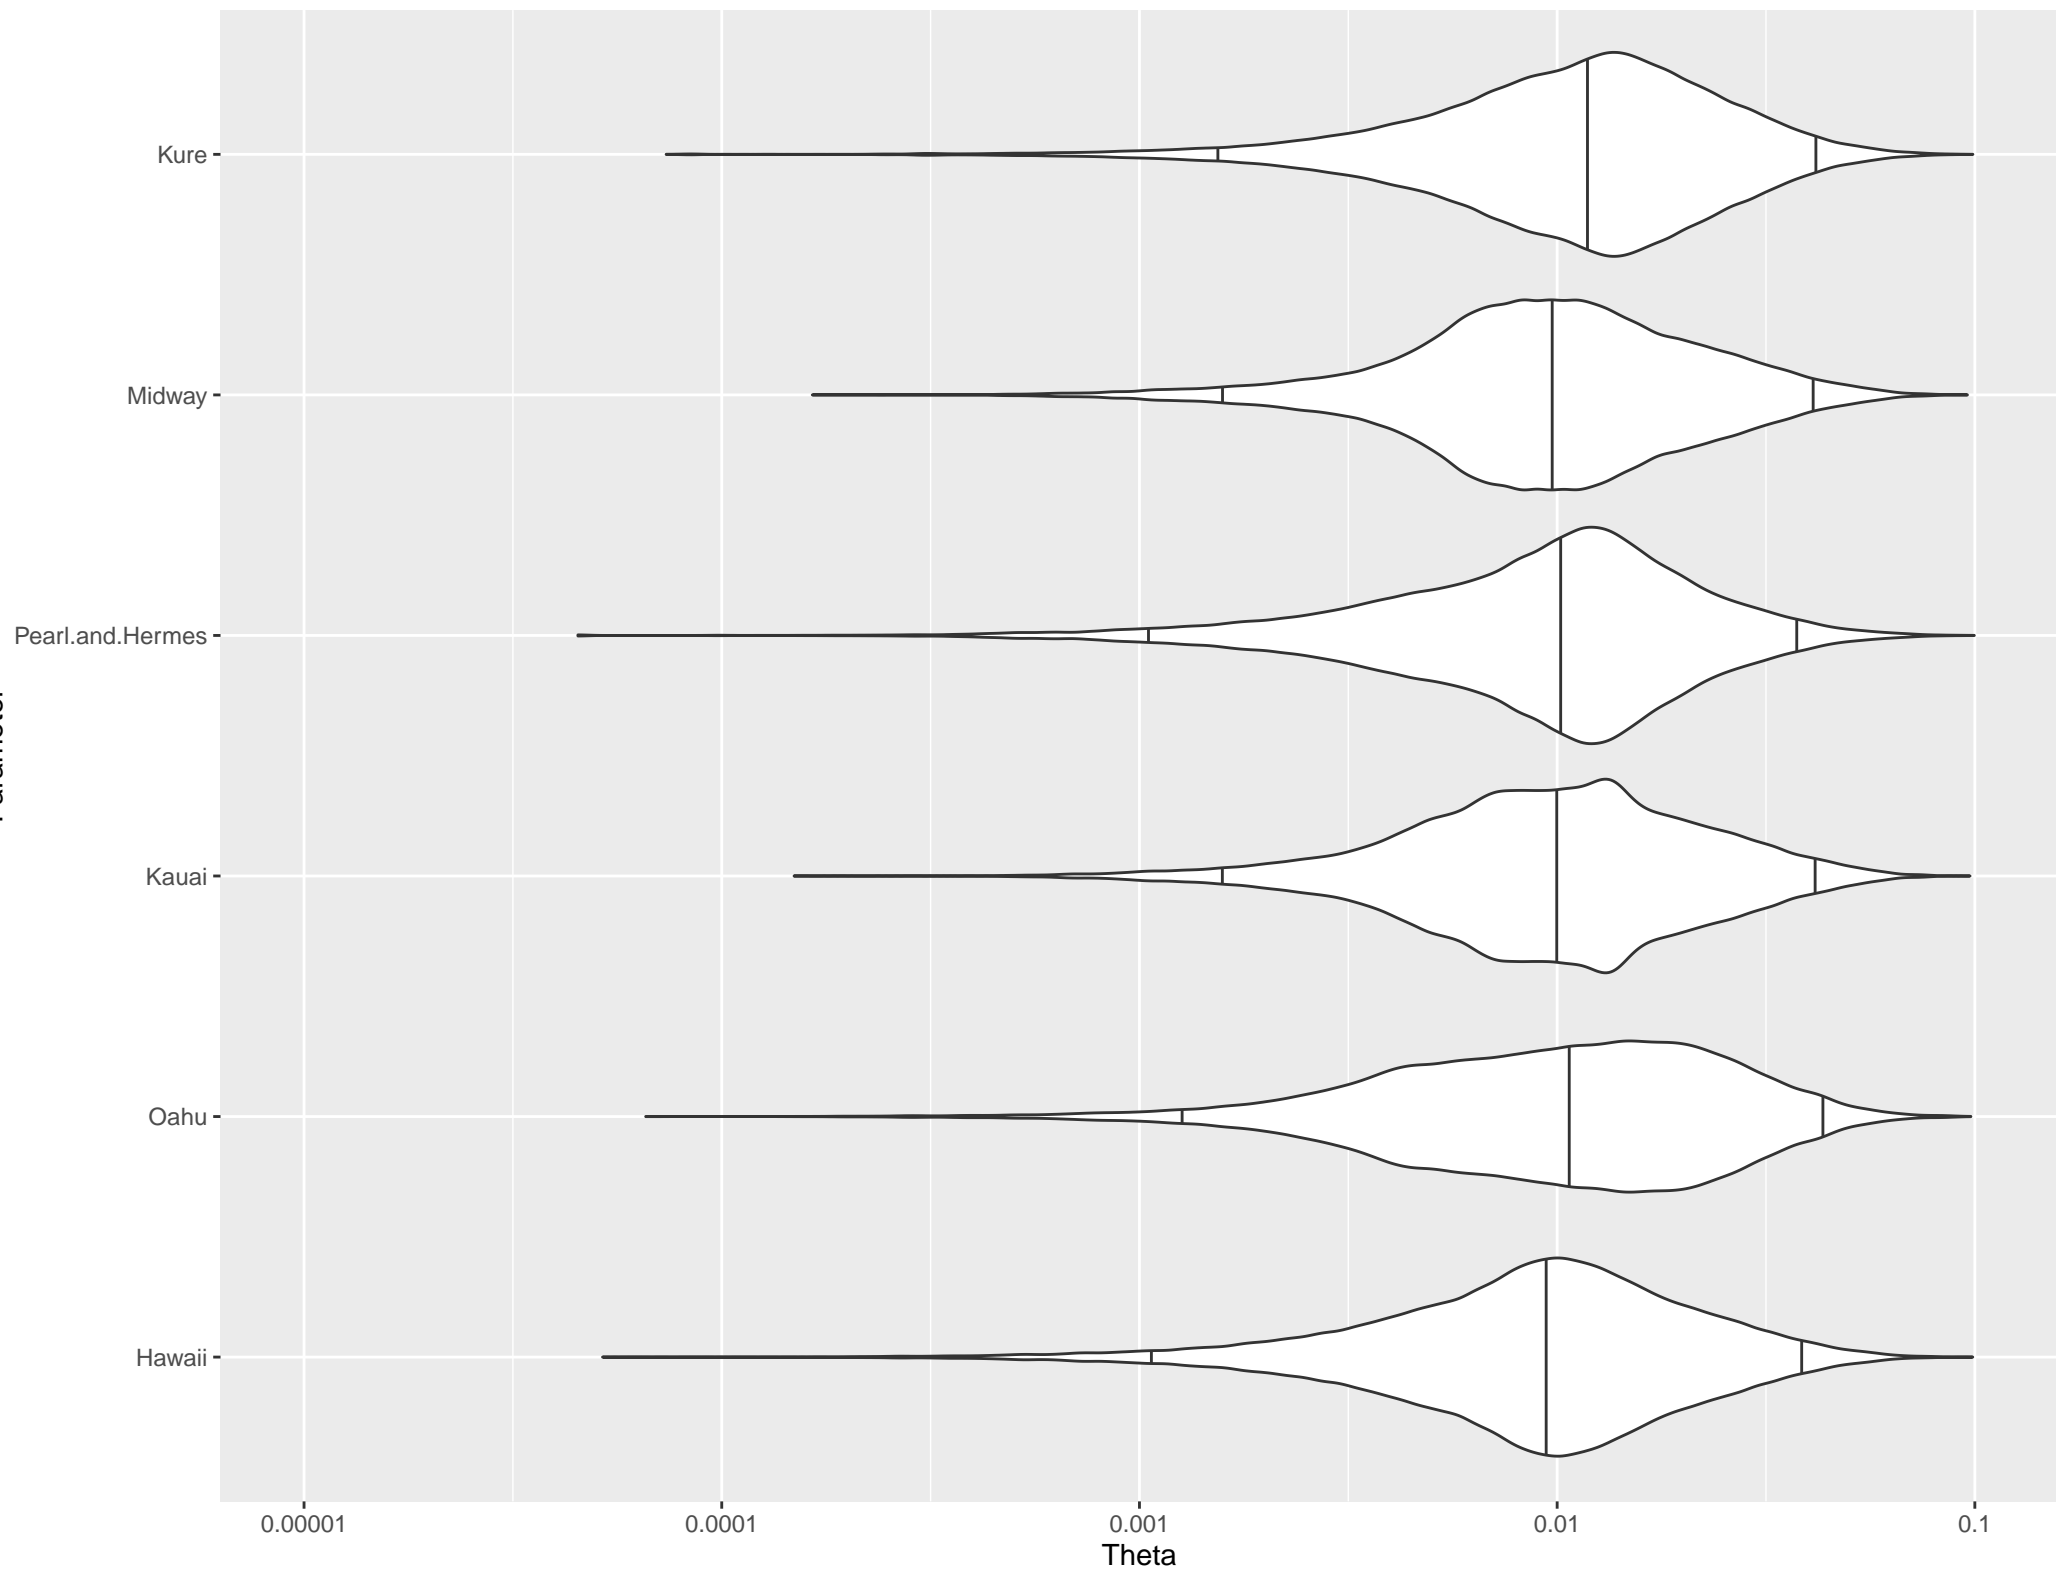

# Holothuria atra

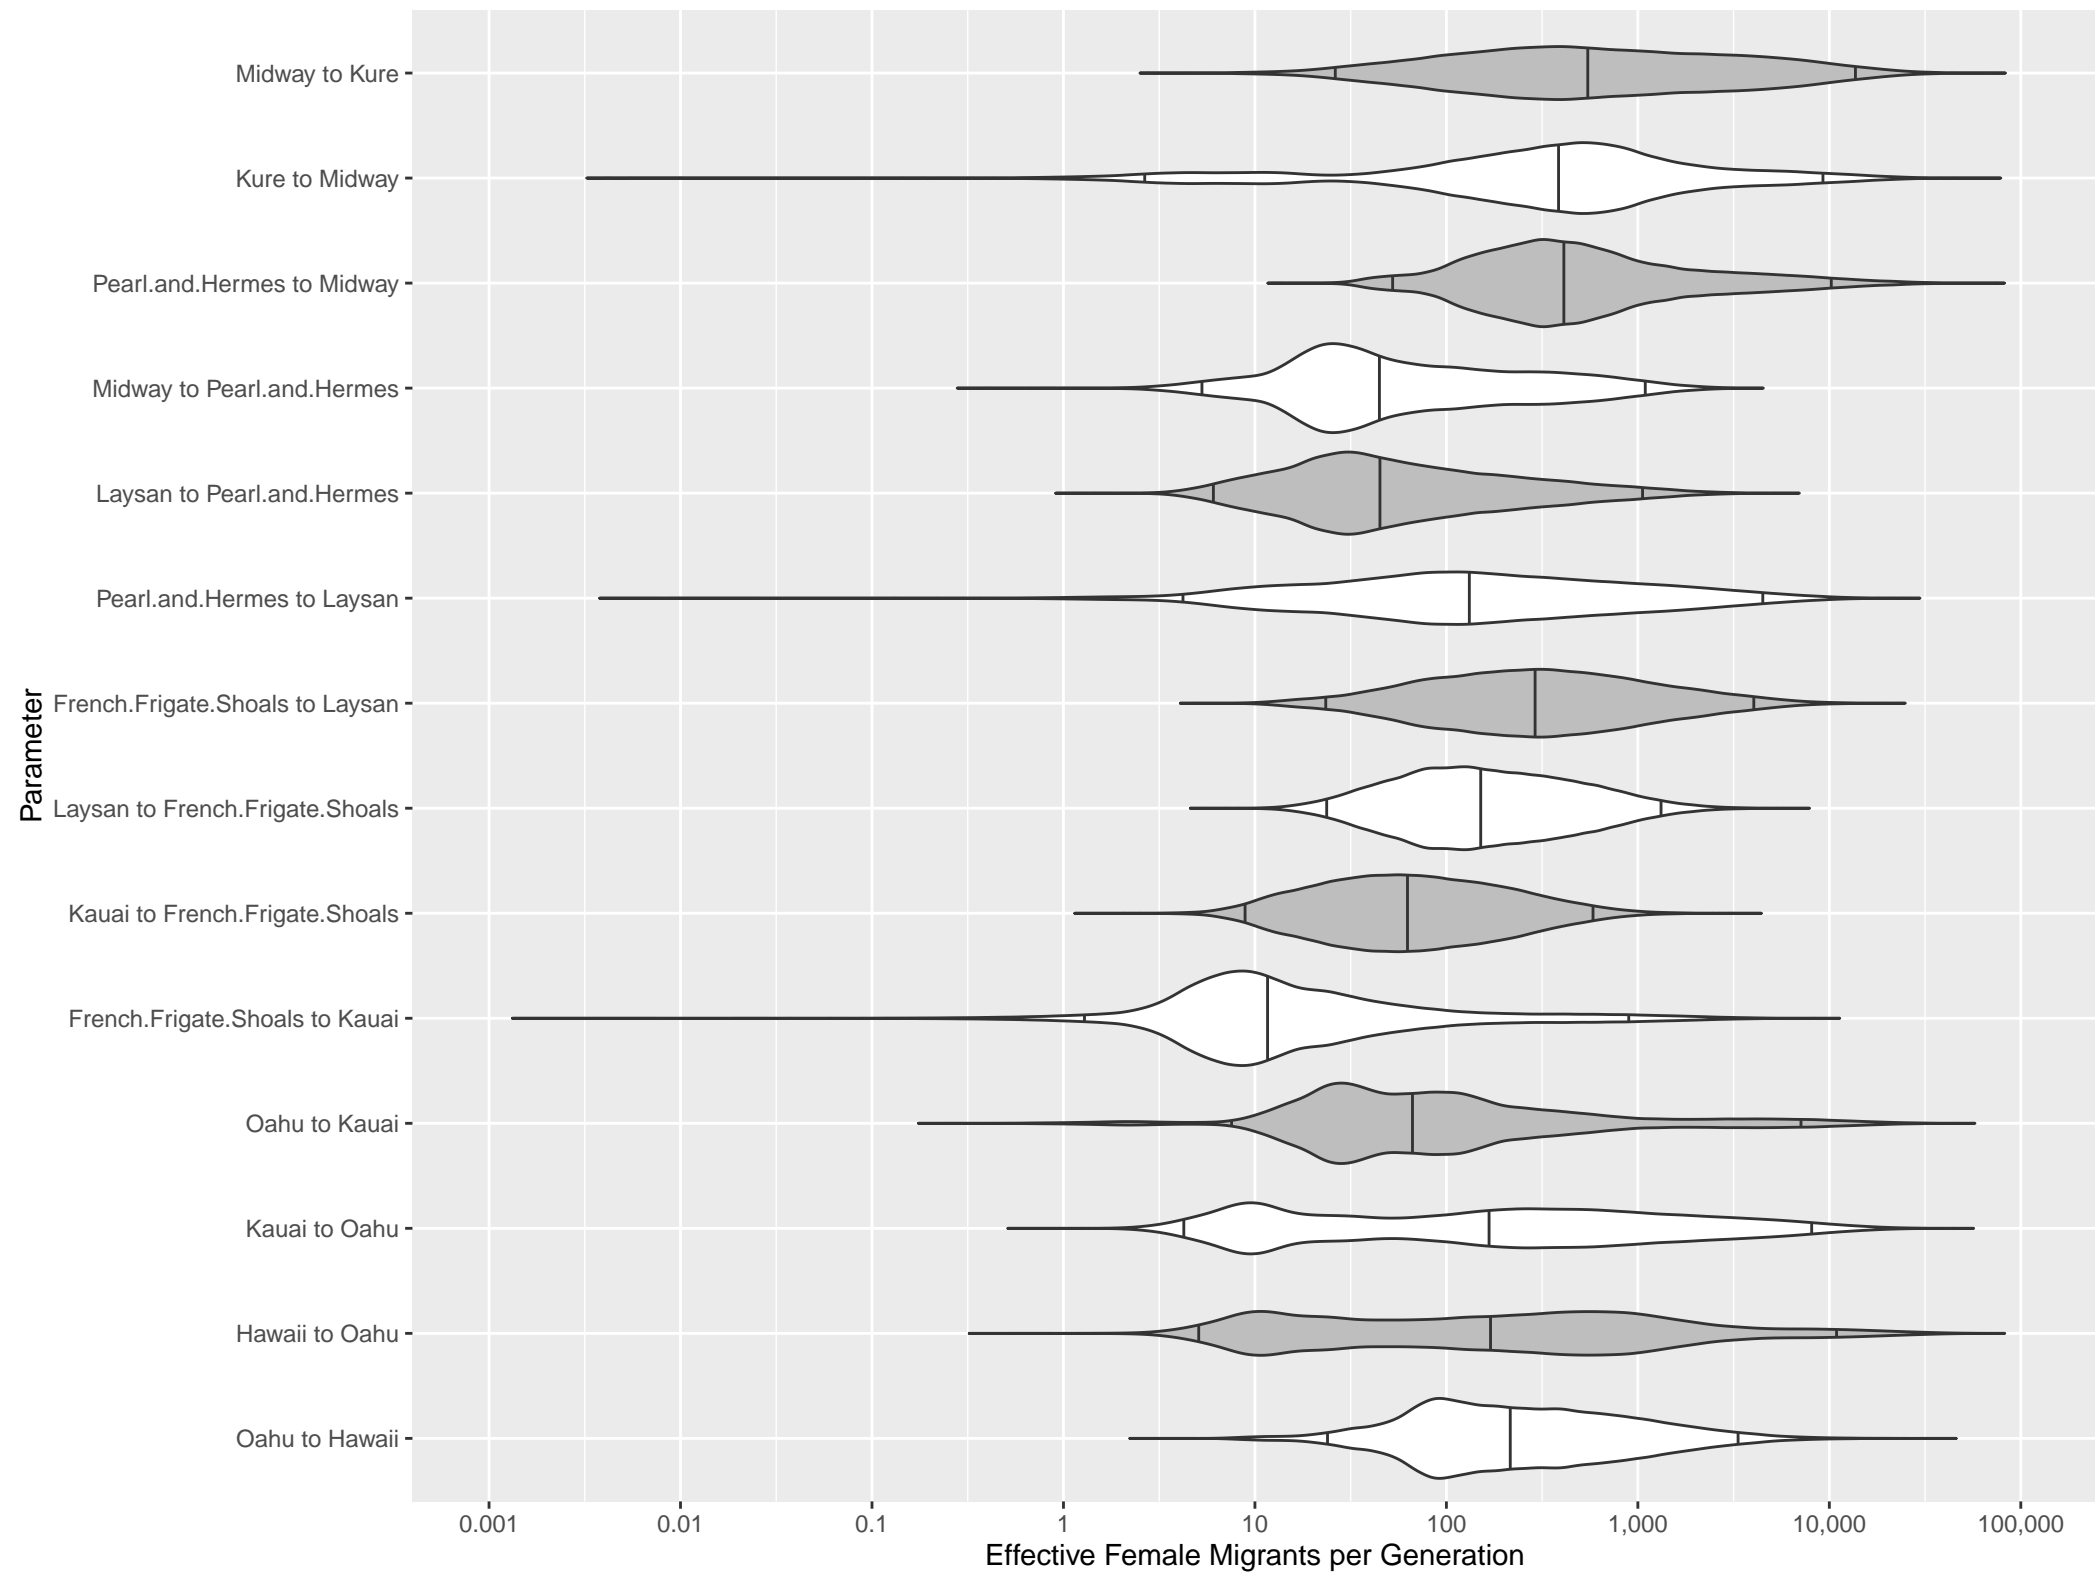

# Holothuria atra

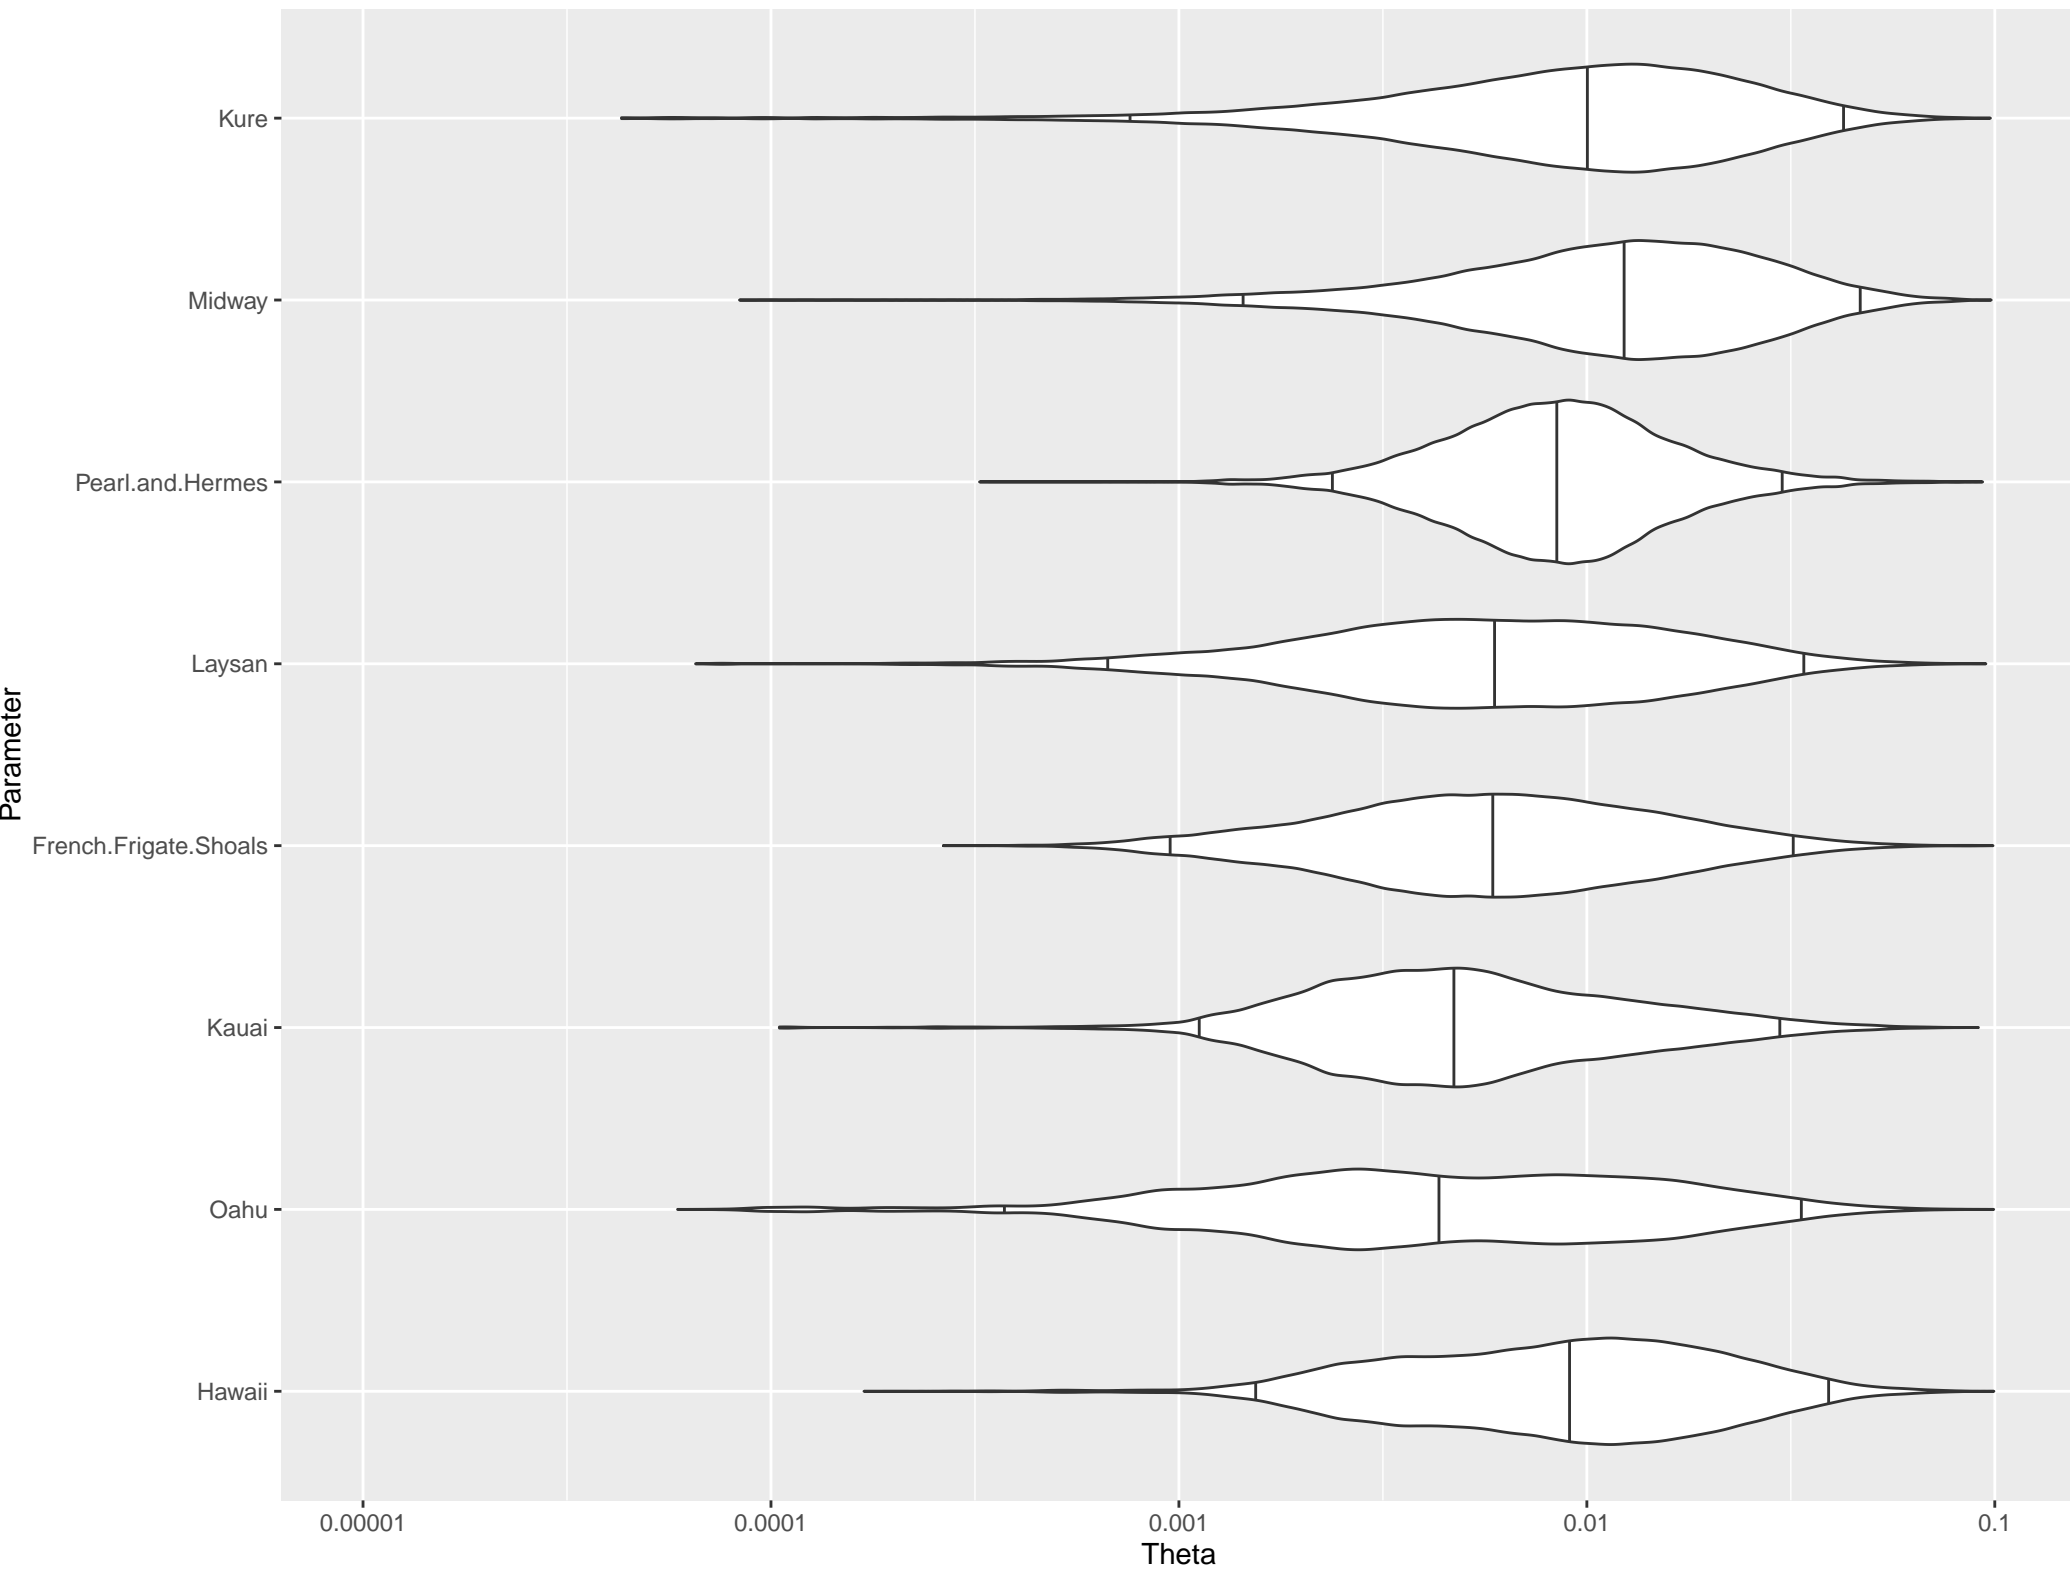

# Holothuria whitmaei

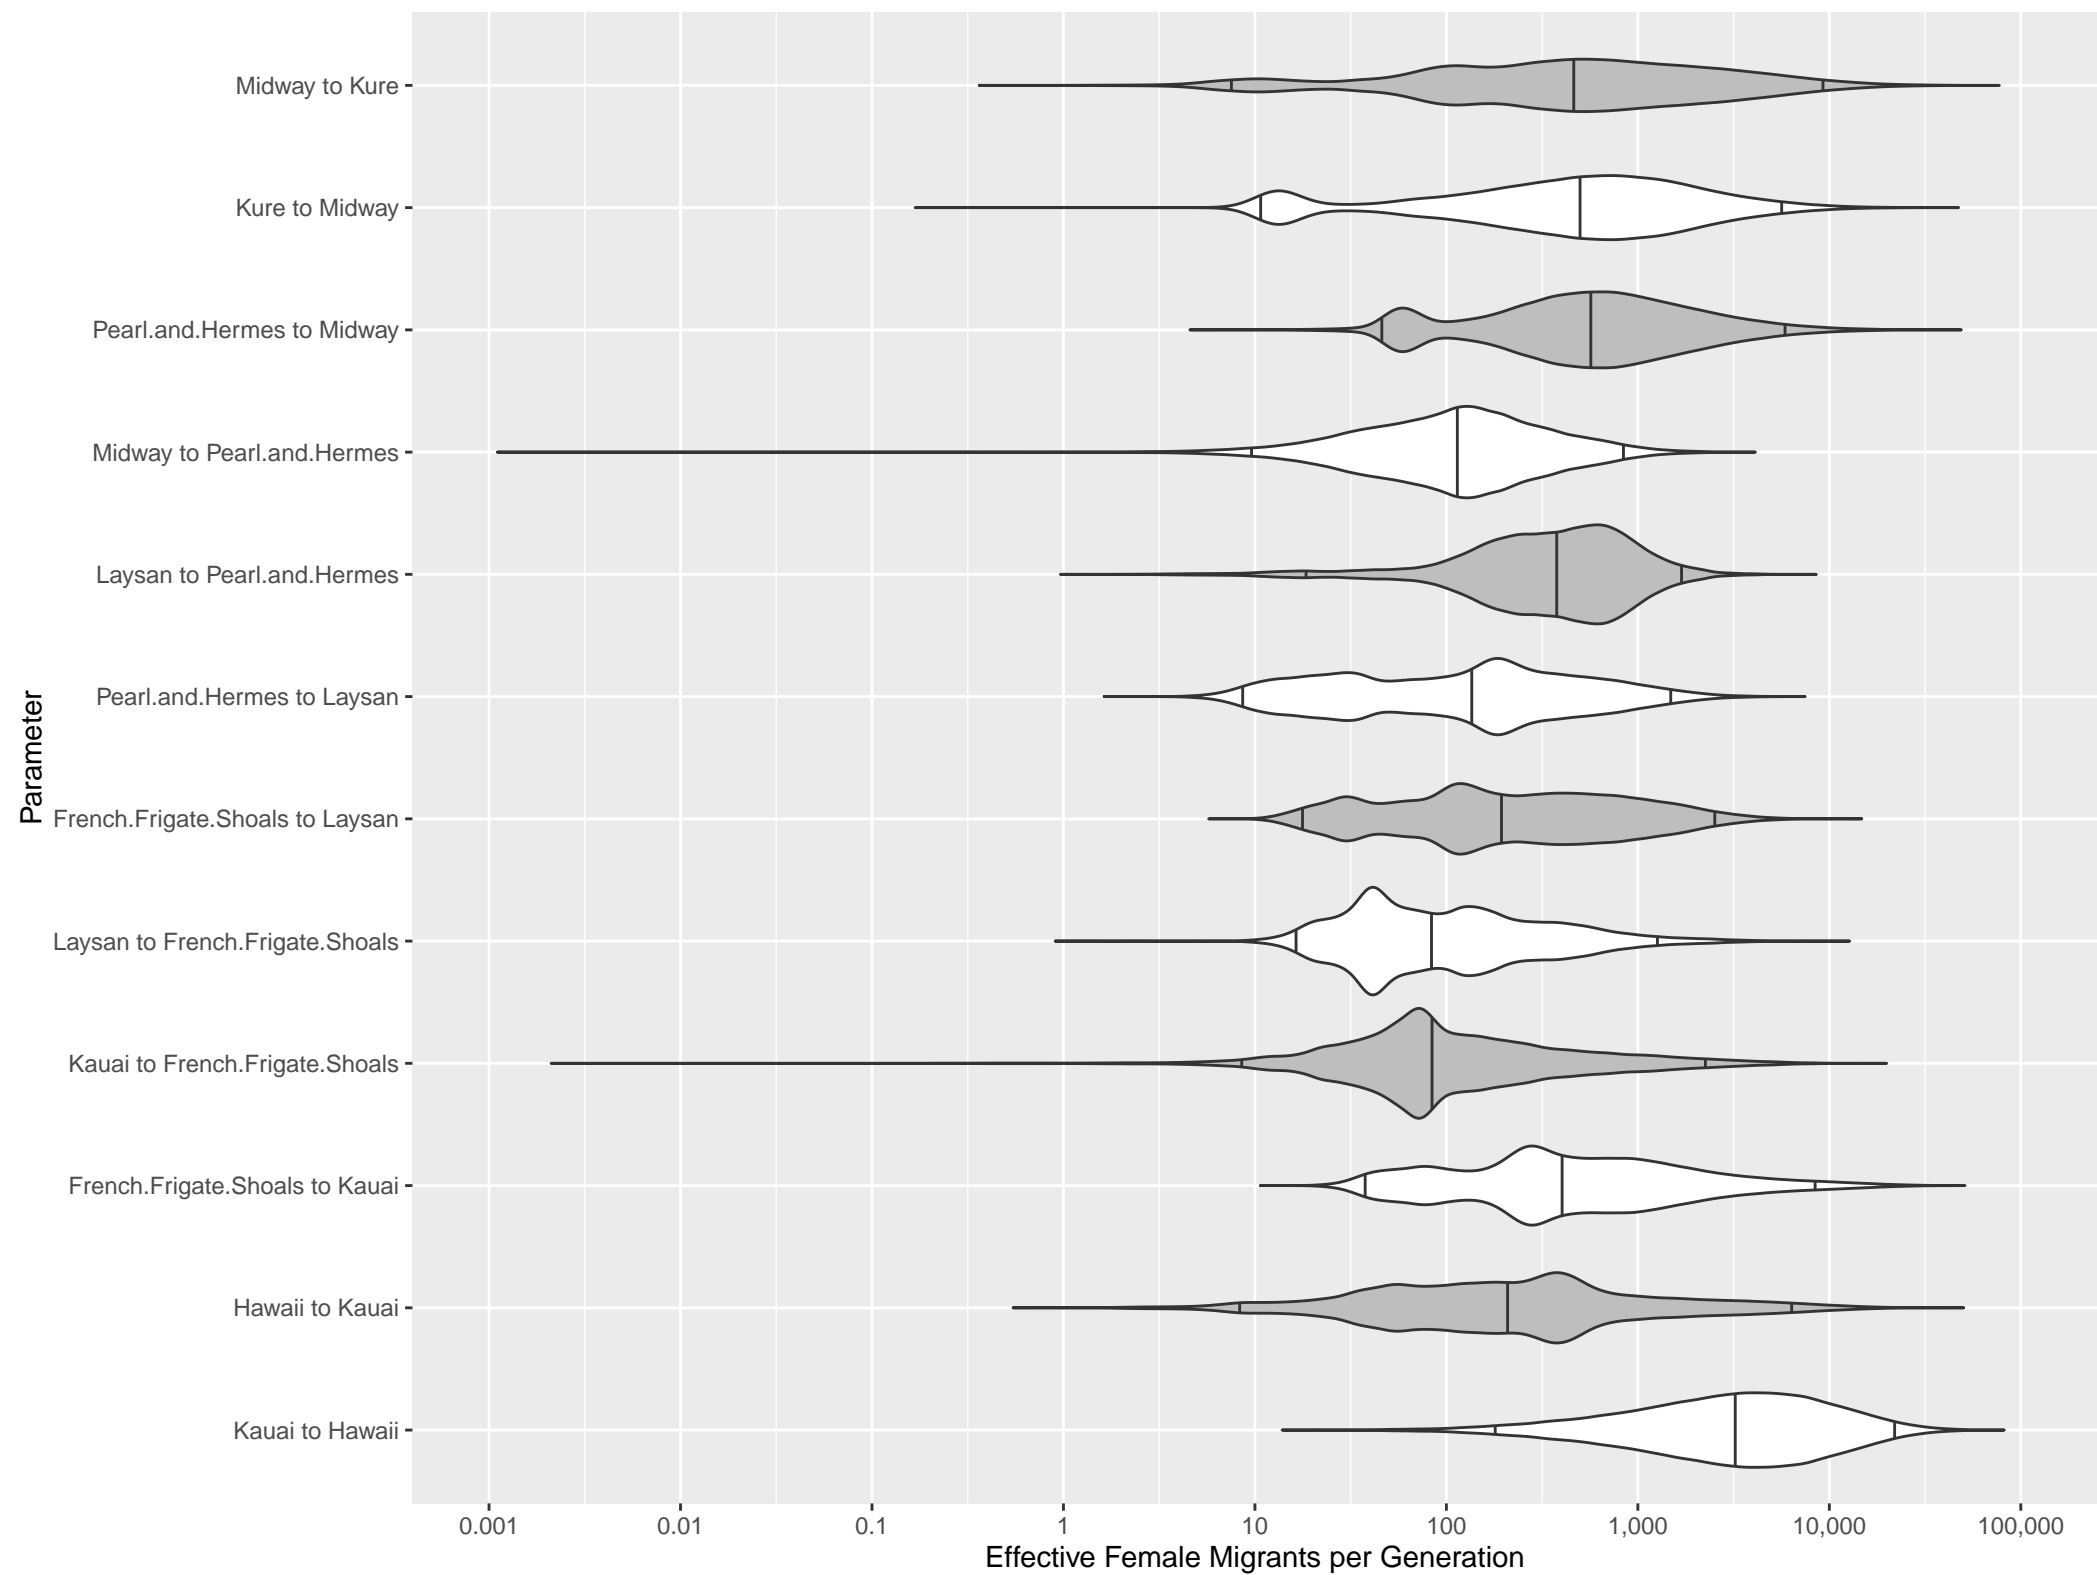

# Holothuria whitmaei

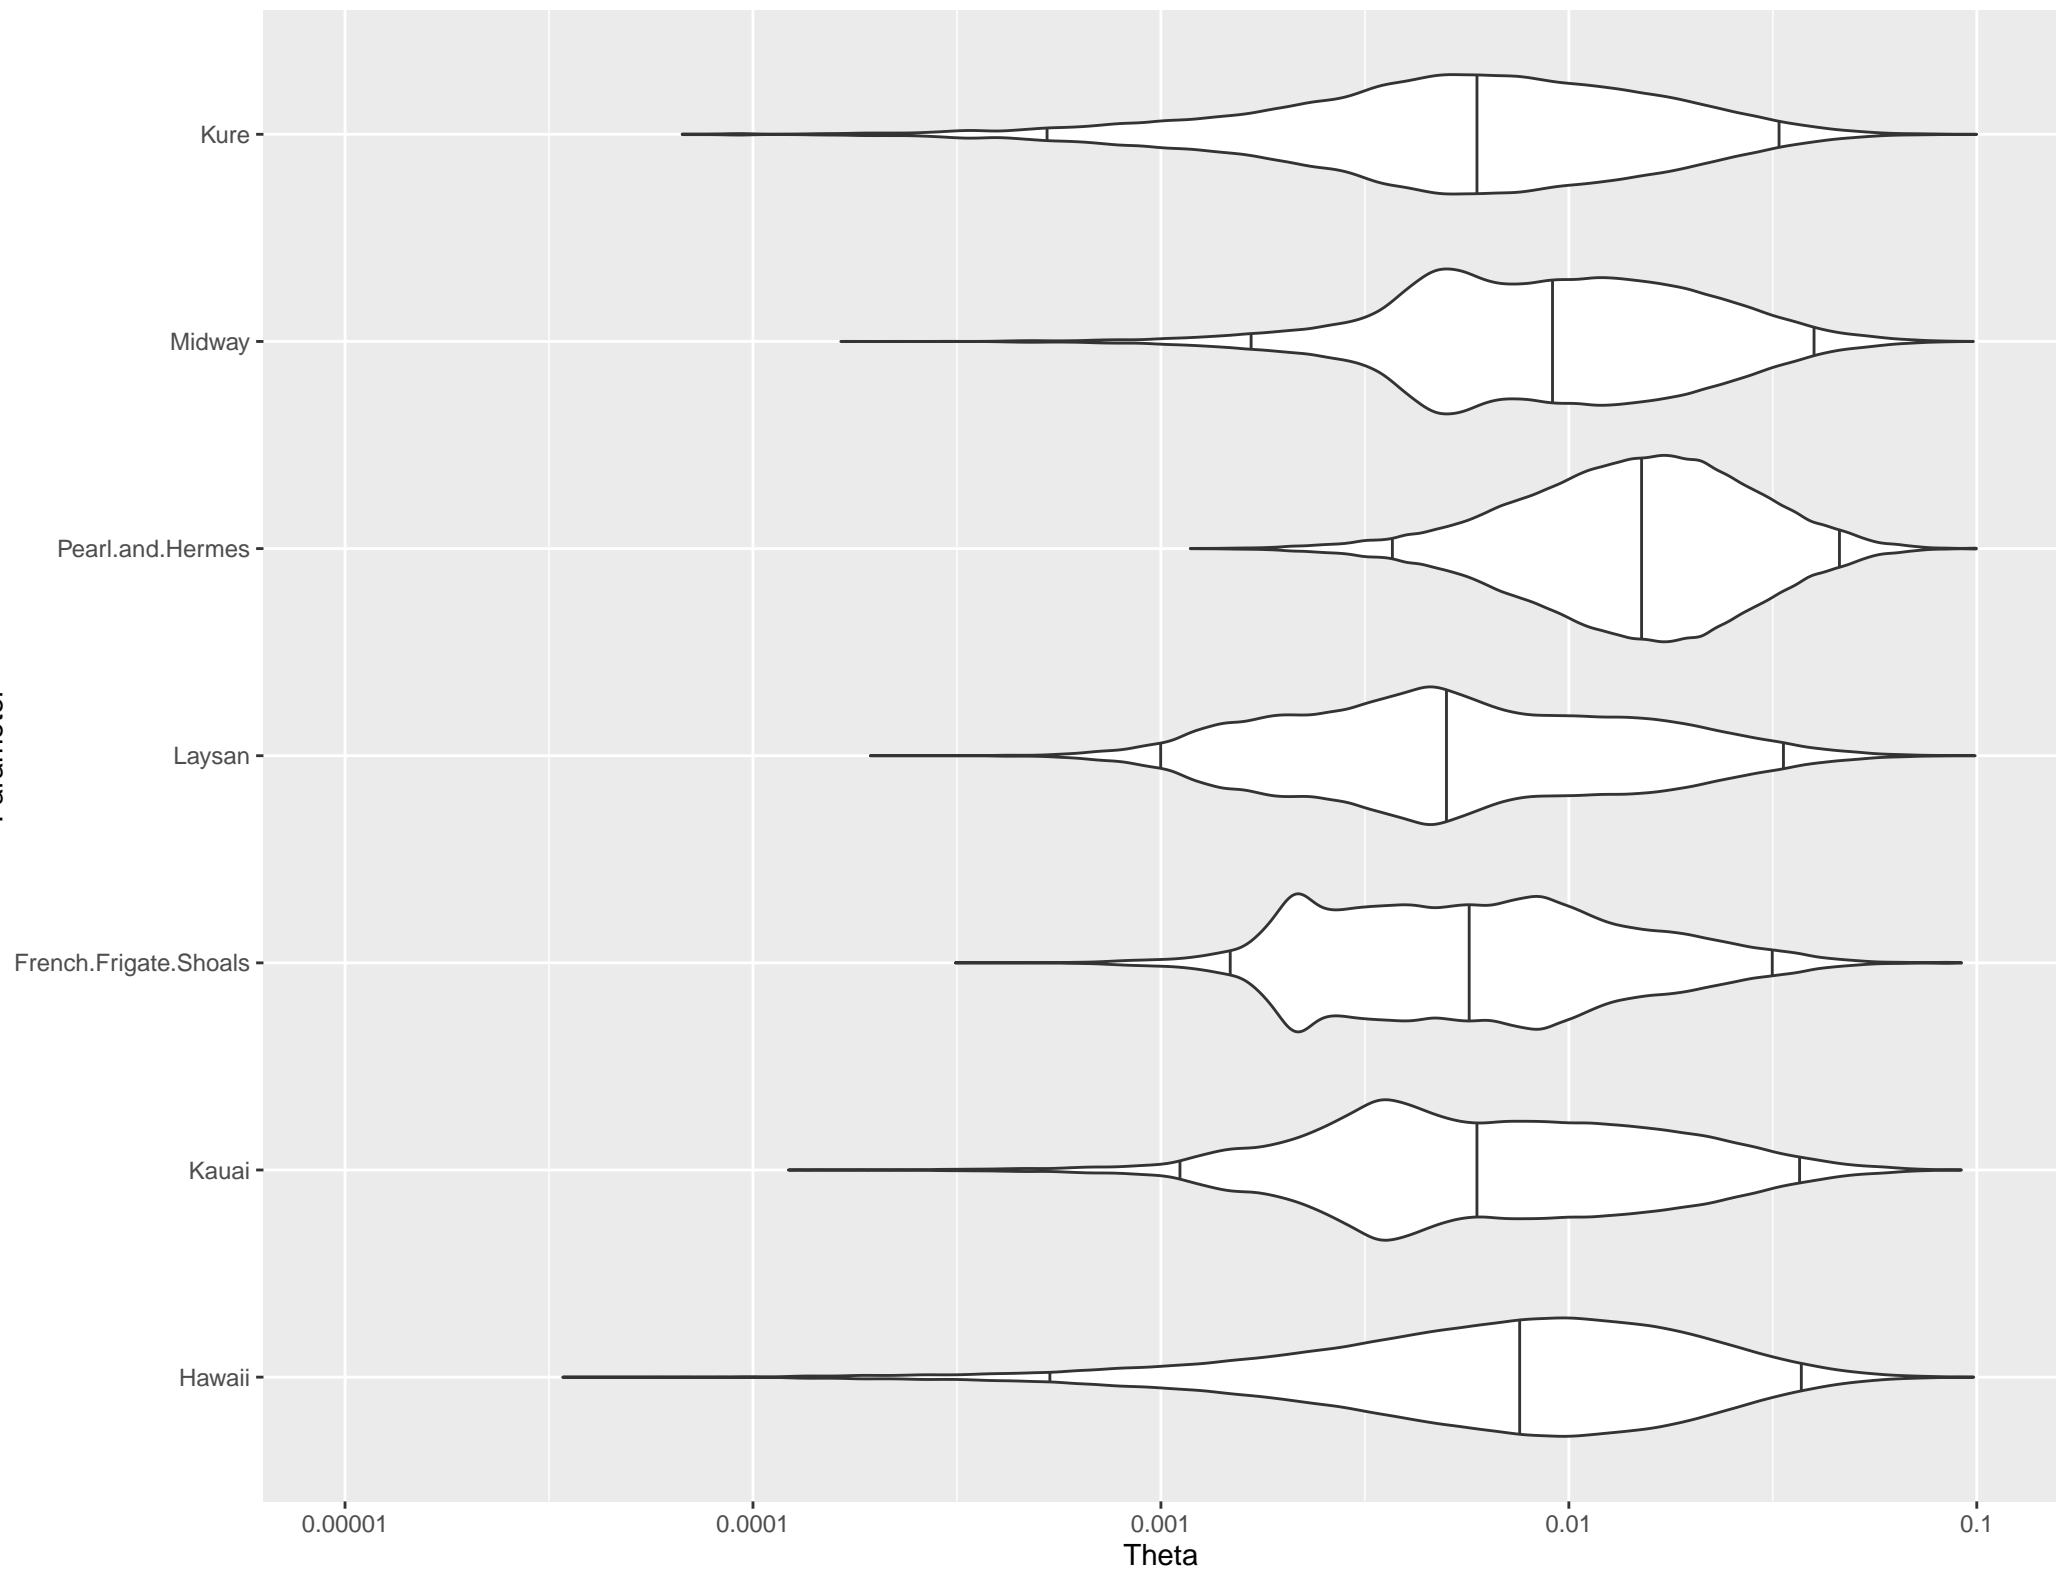

Mulloidichthys flavolineatus

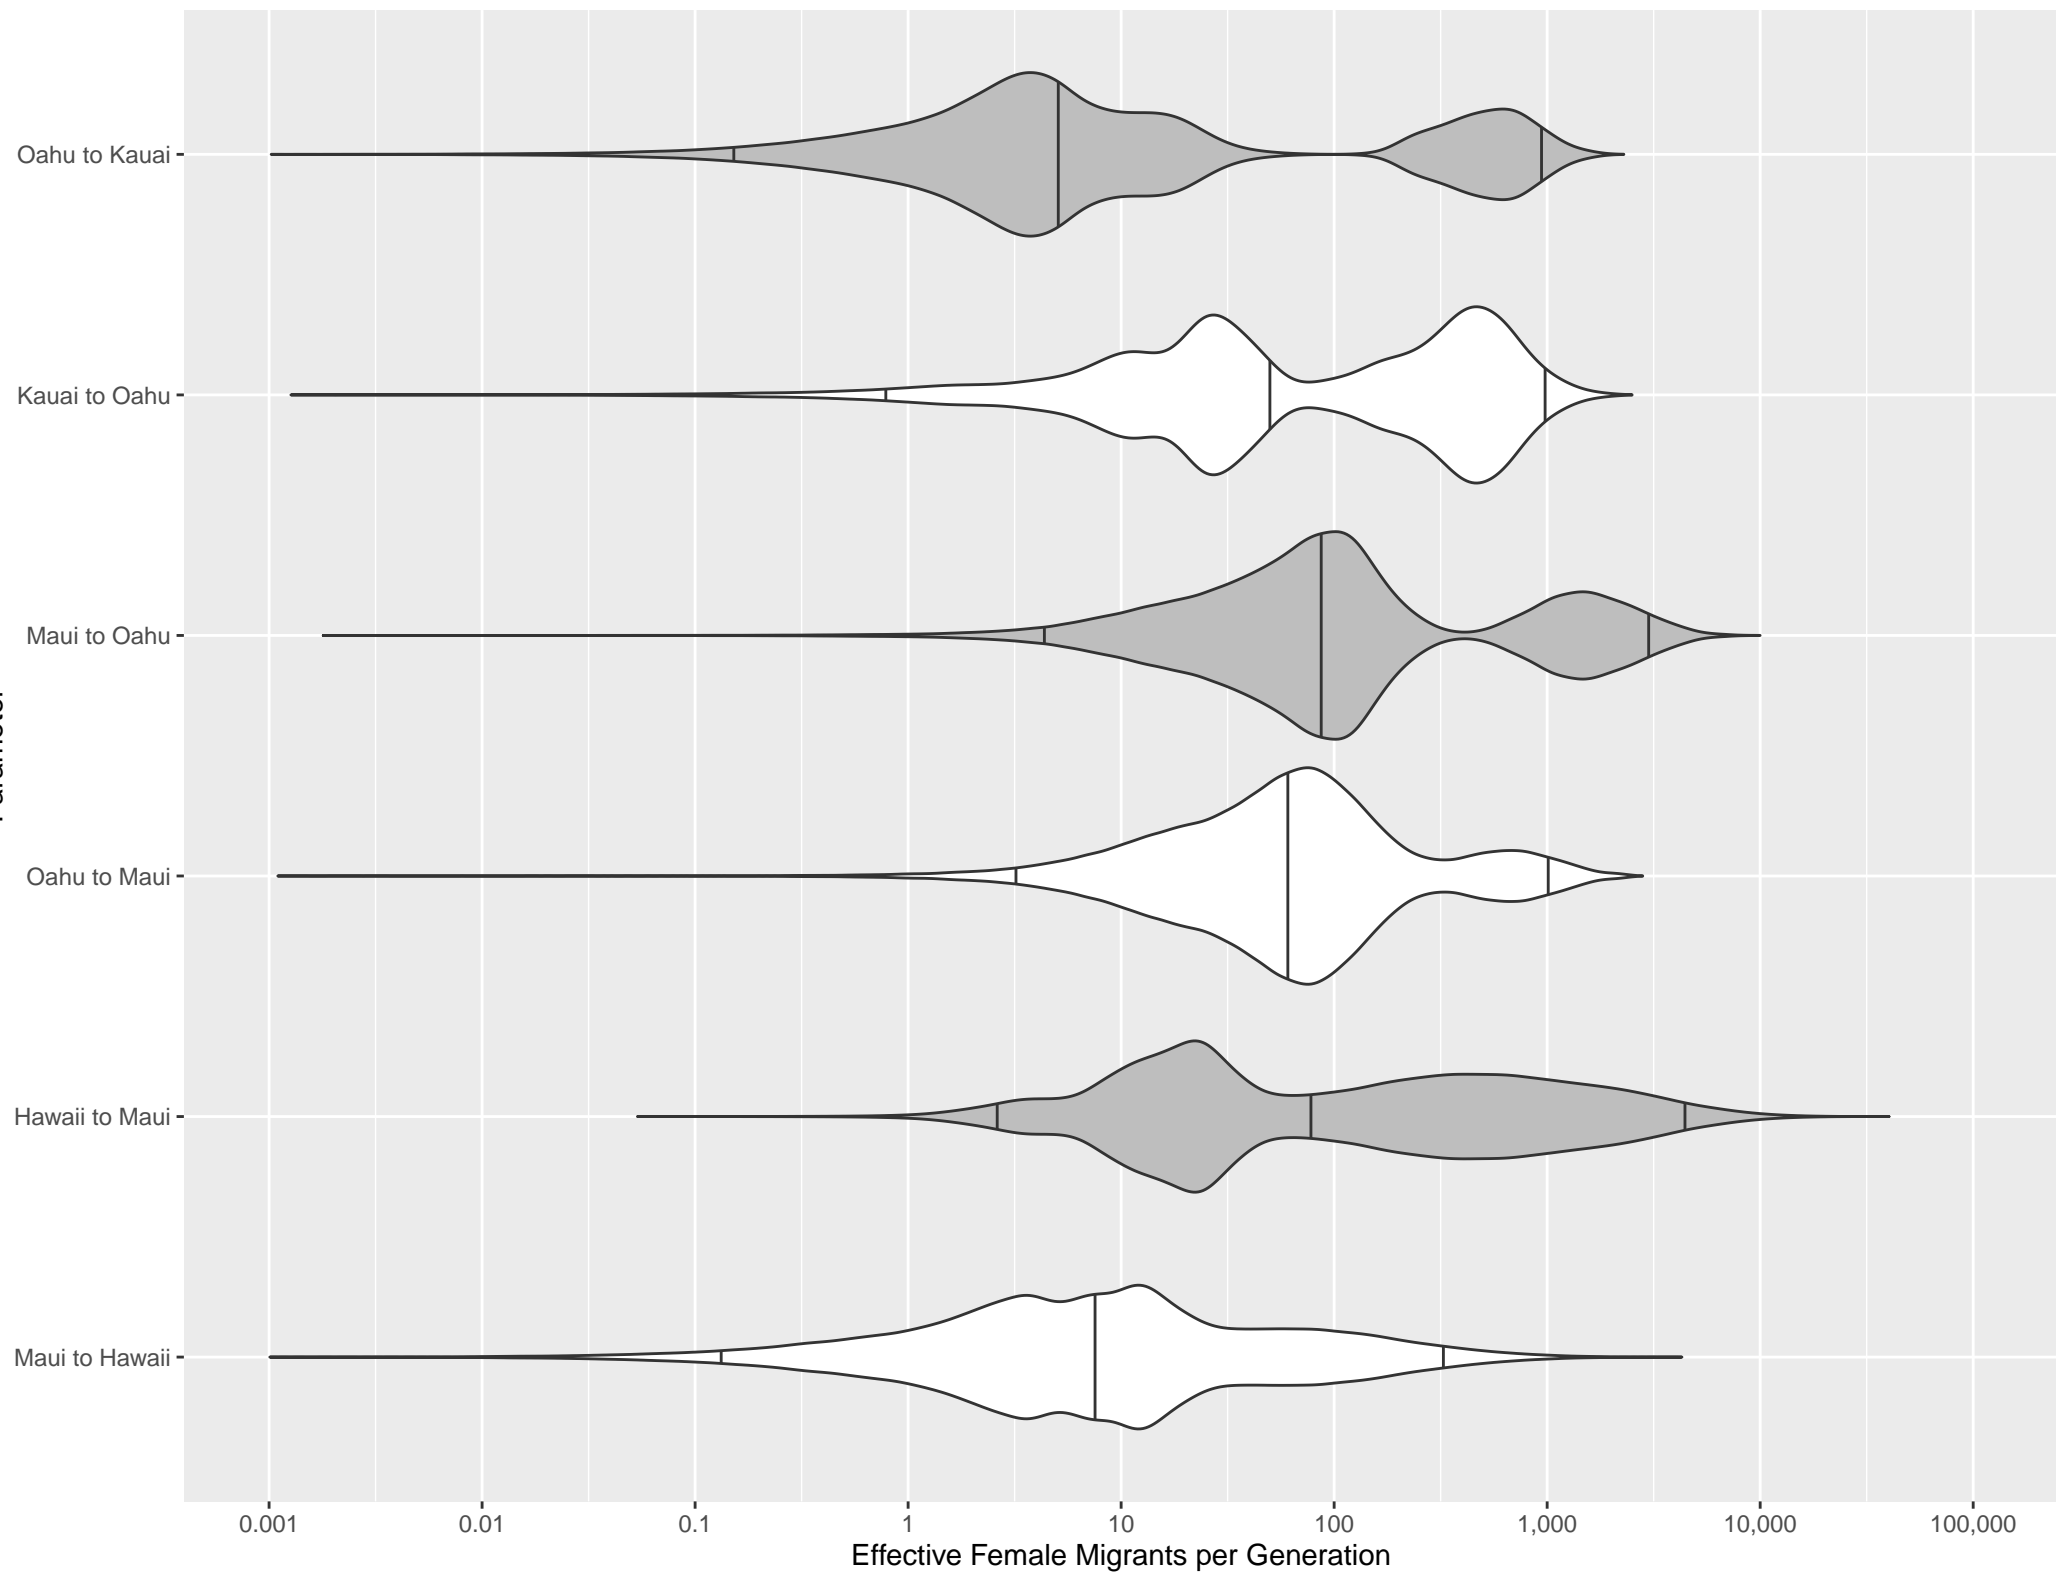

Mulloidichthys flavolineatus

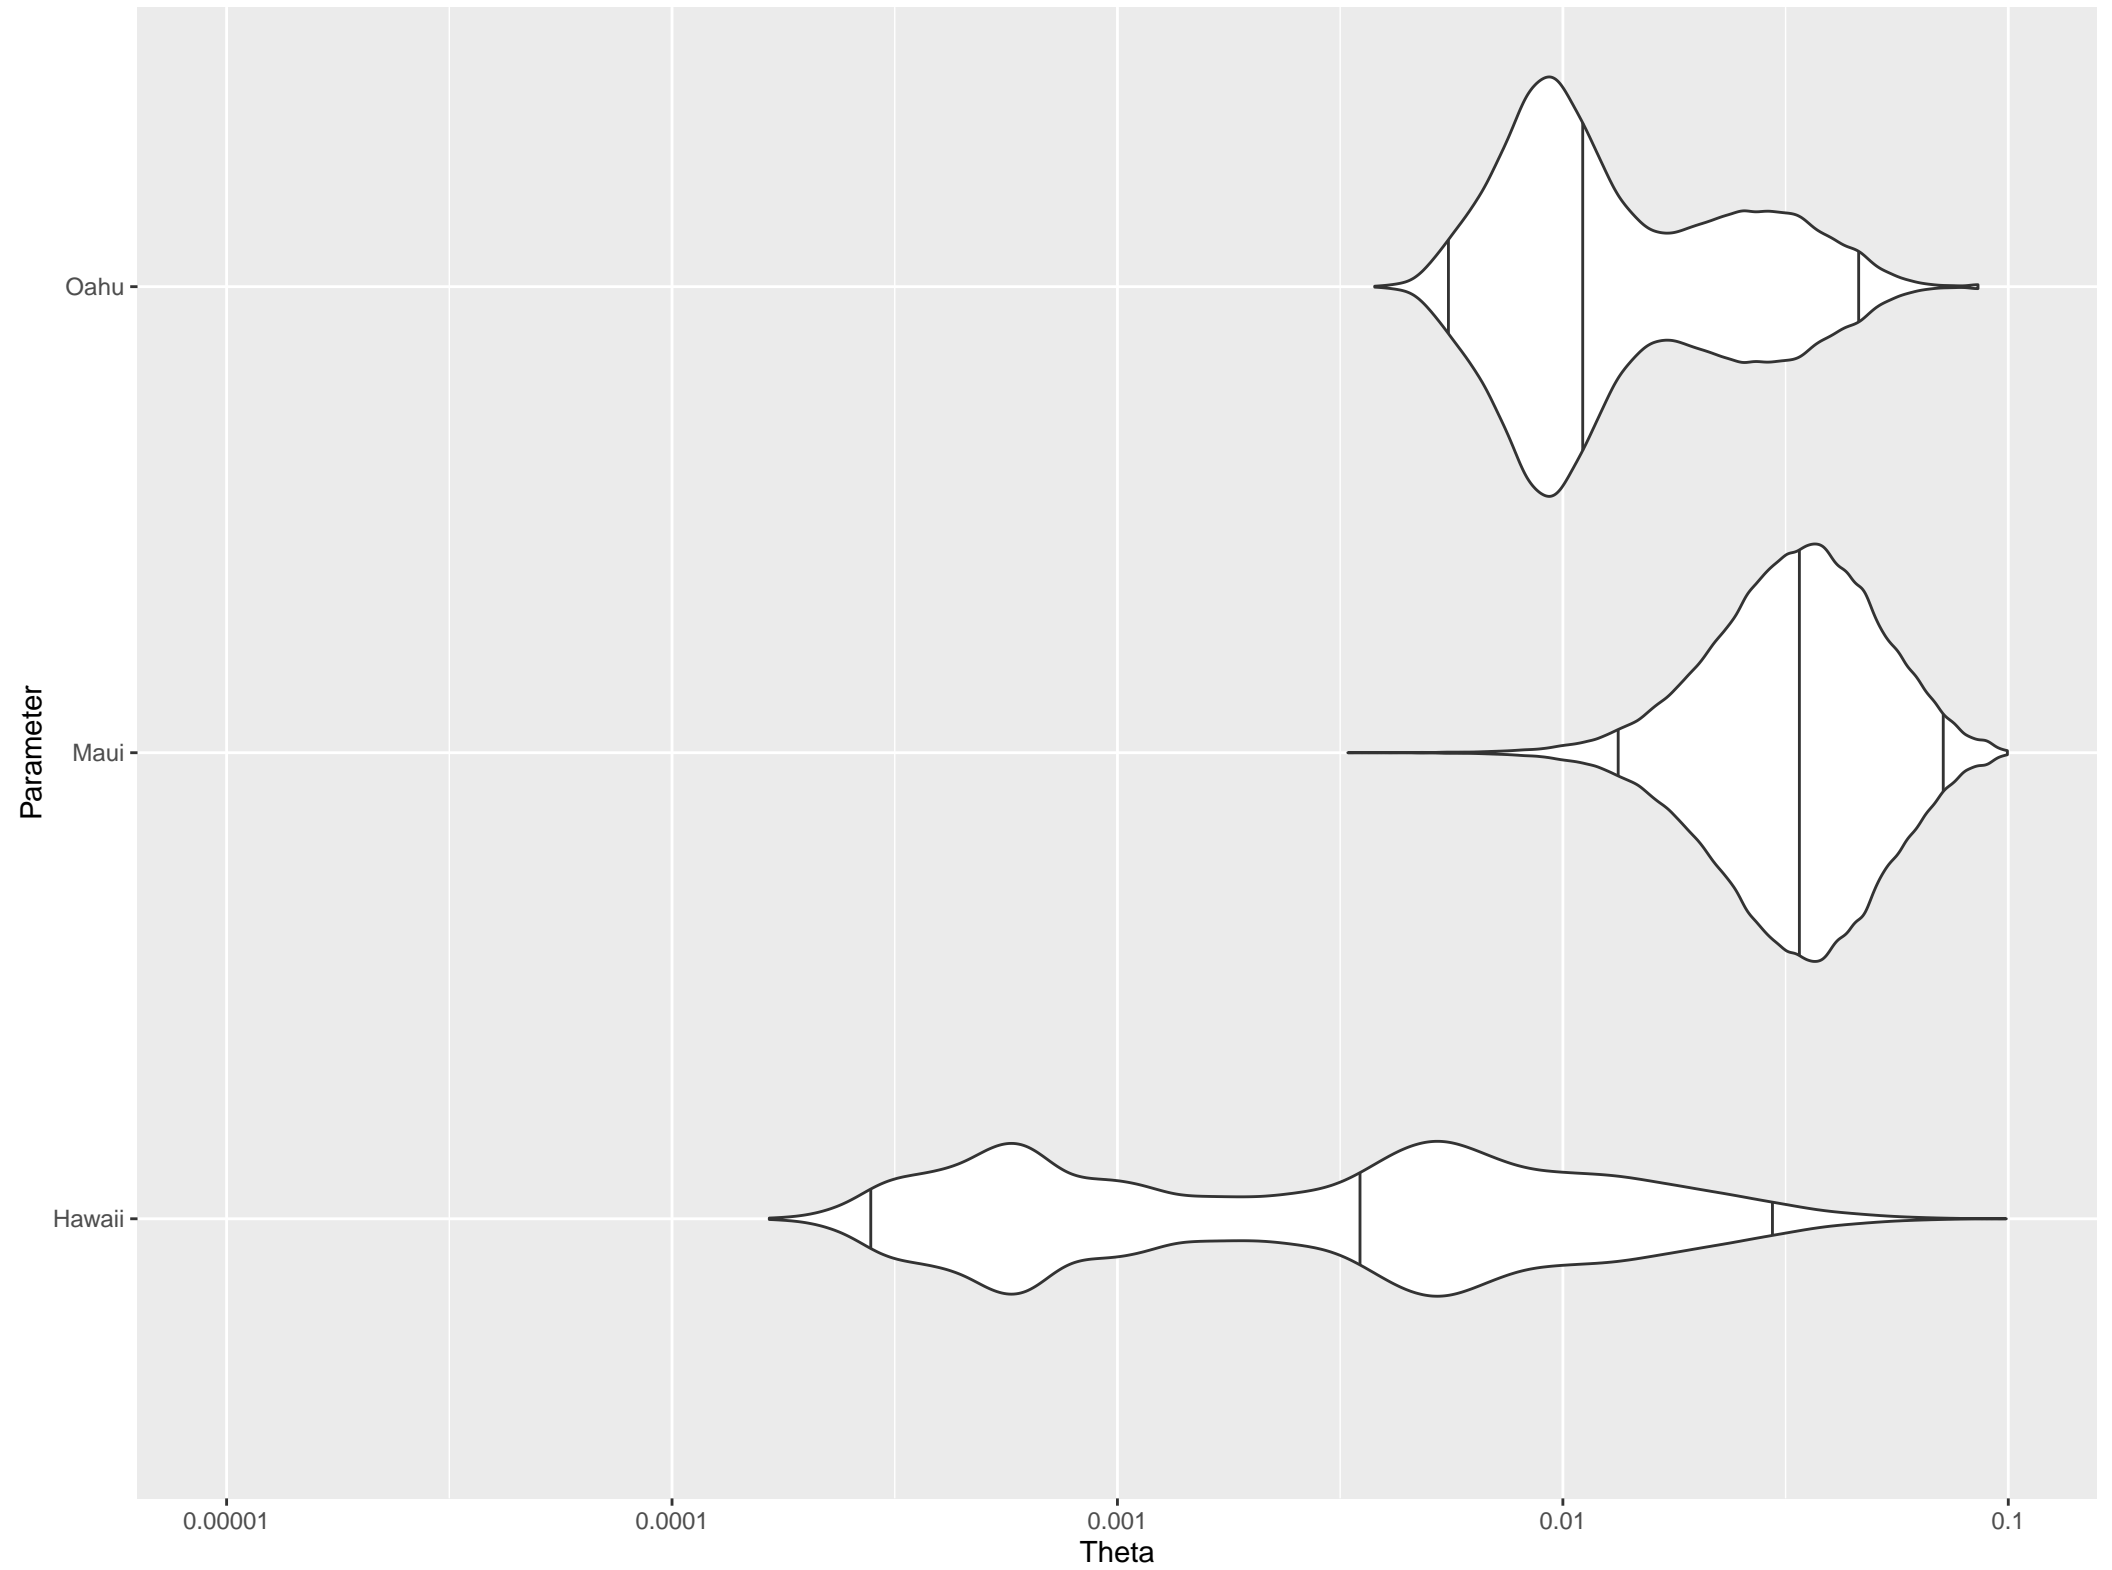



# Mulloidichthys vanicolensis

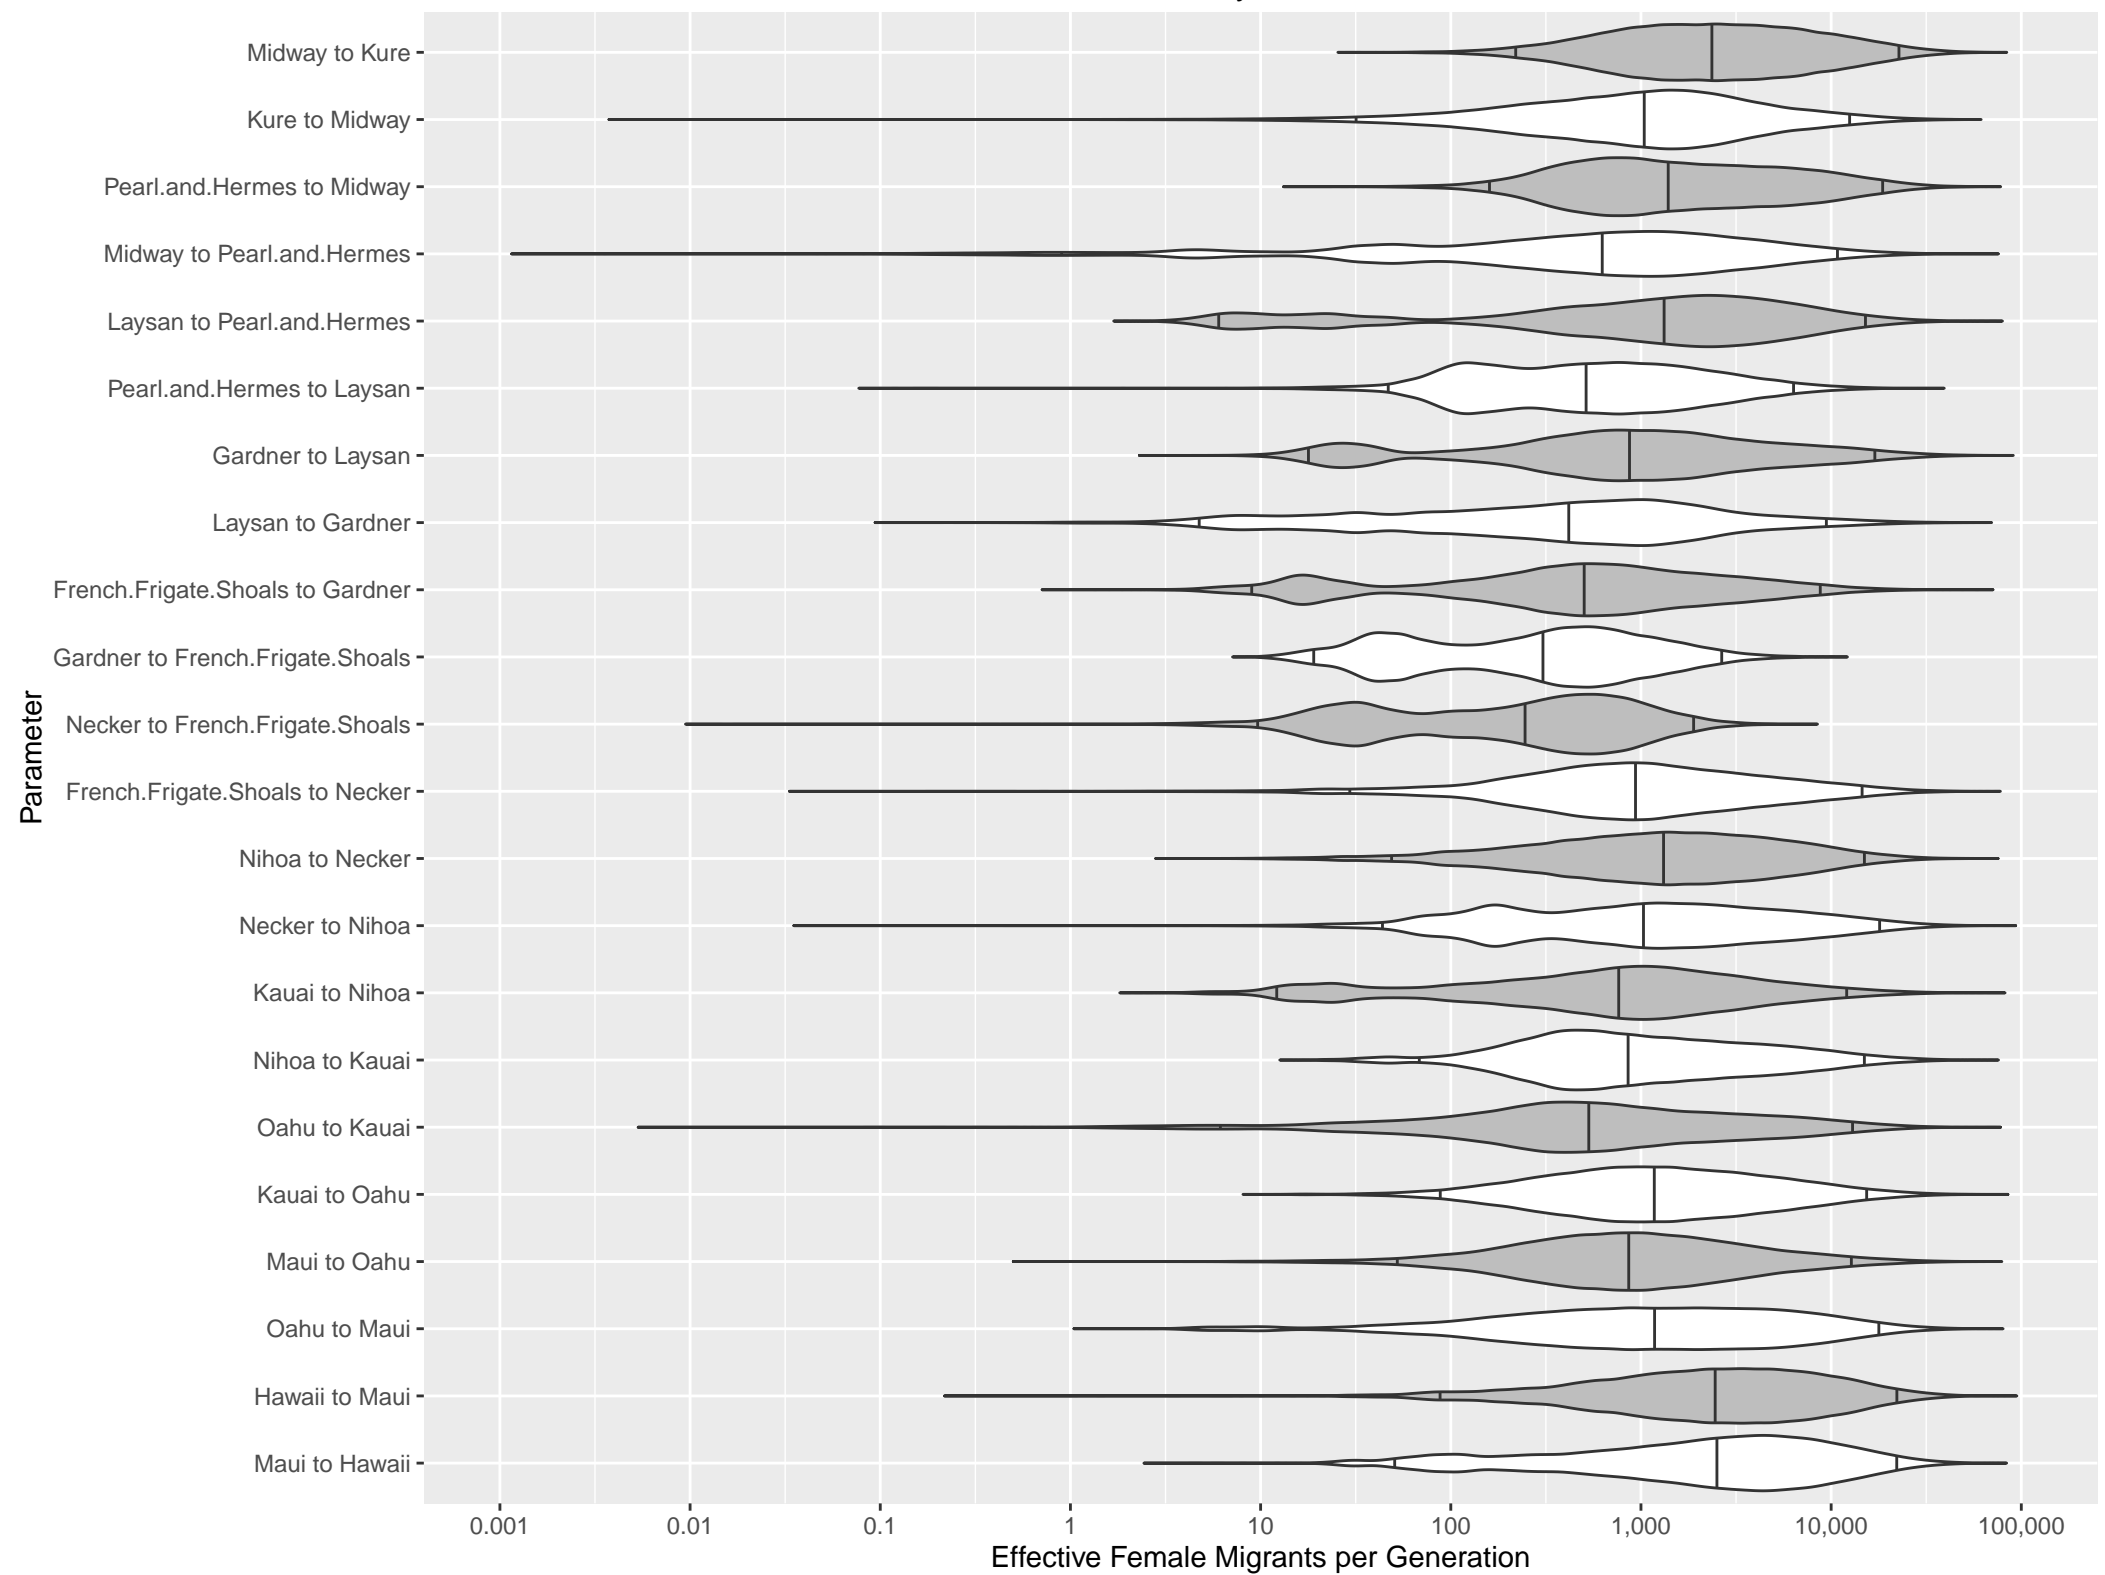

# Mulloidichthys vanicolensis

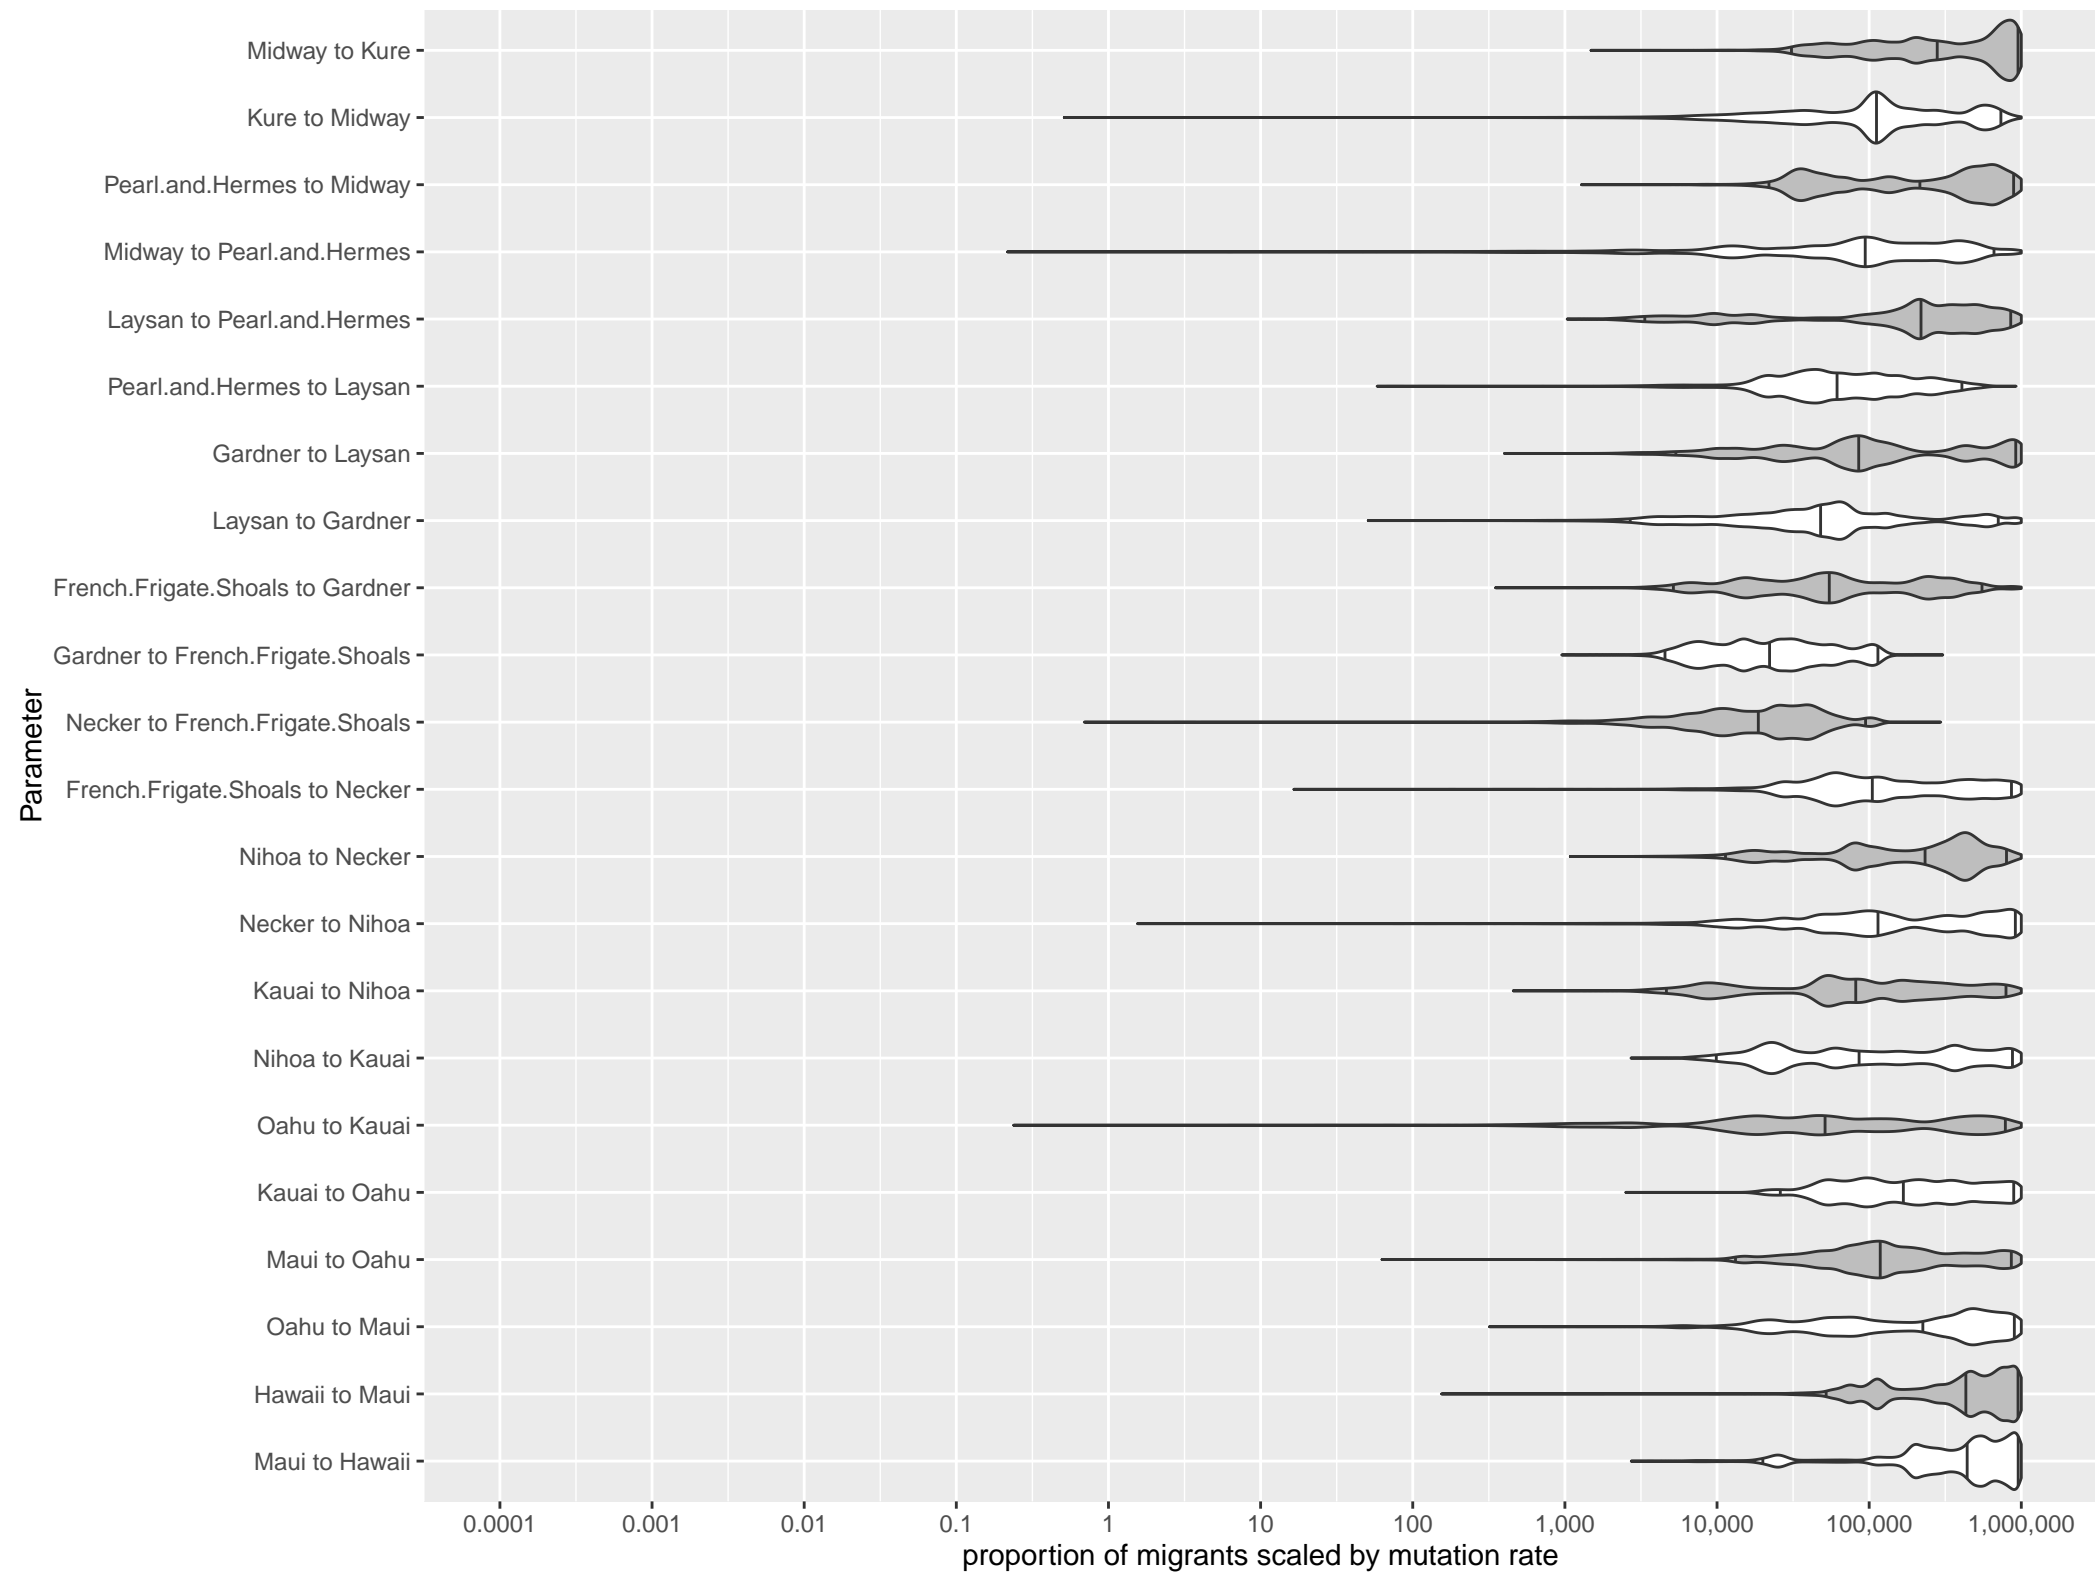

# Mulloidichthys vanicolensis

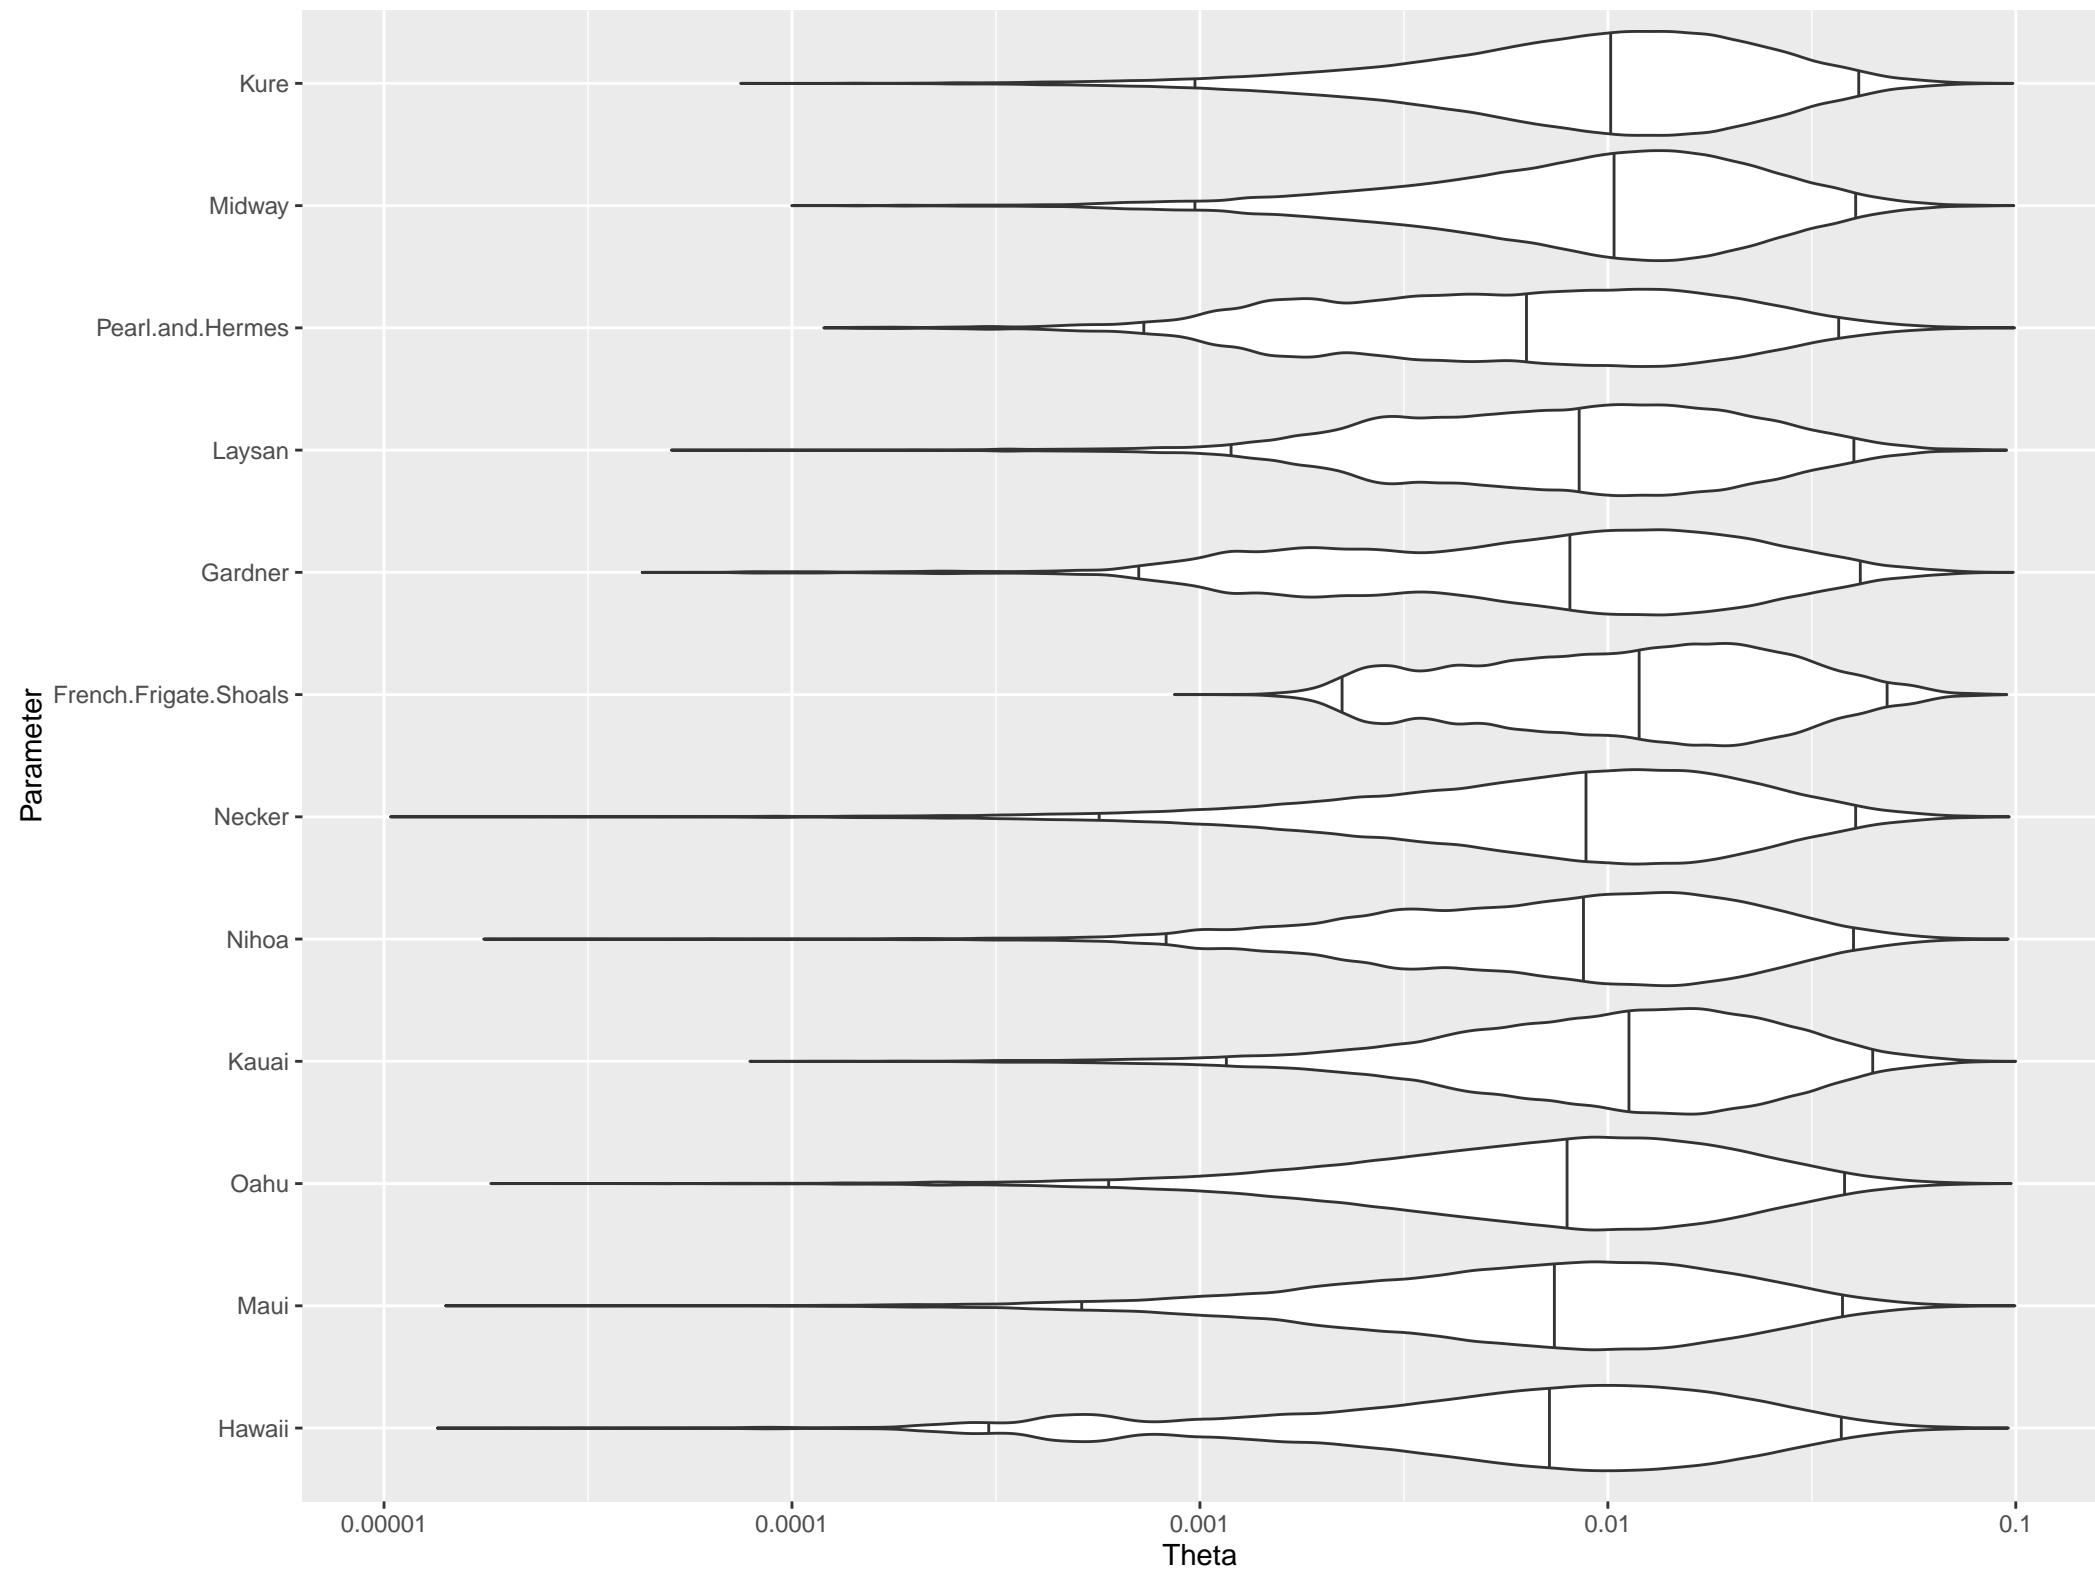

Ophiocoma erinaceus

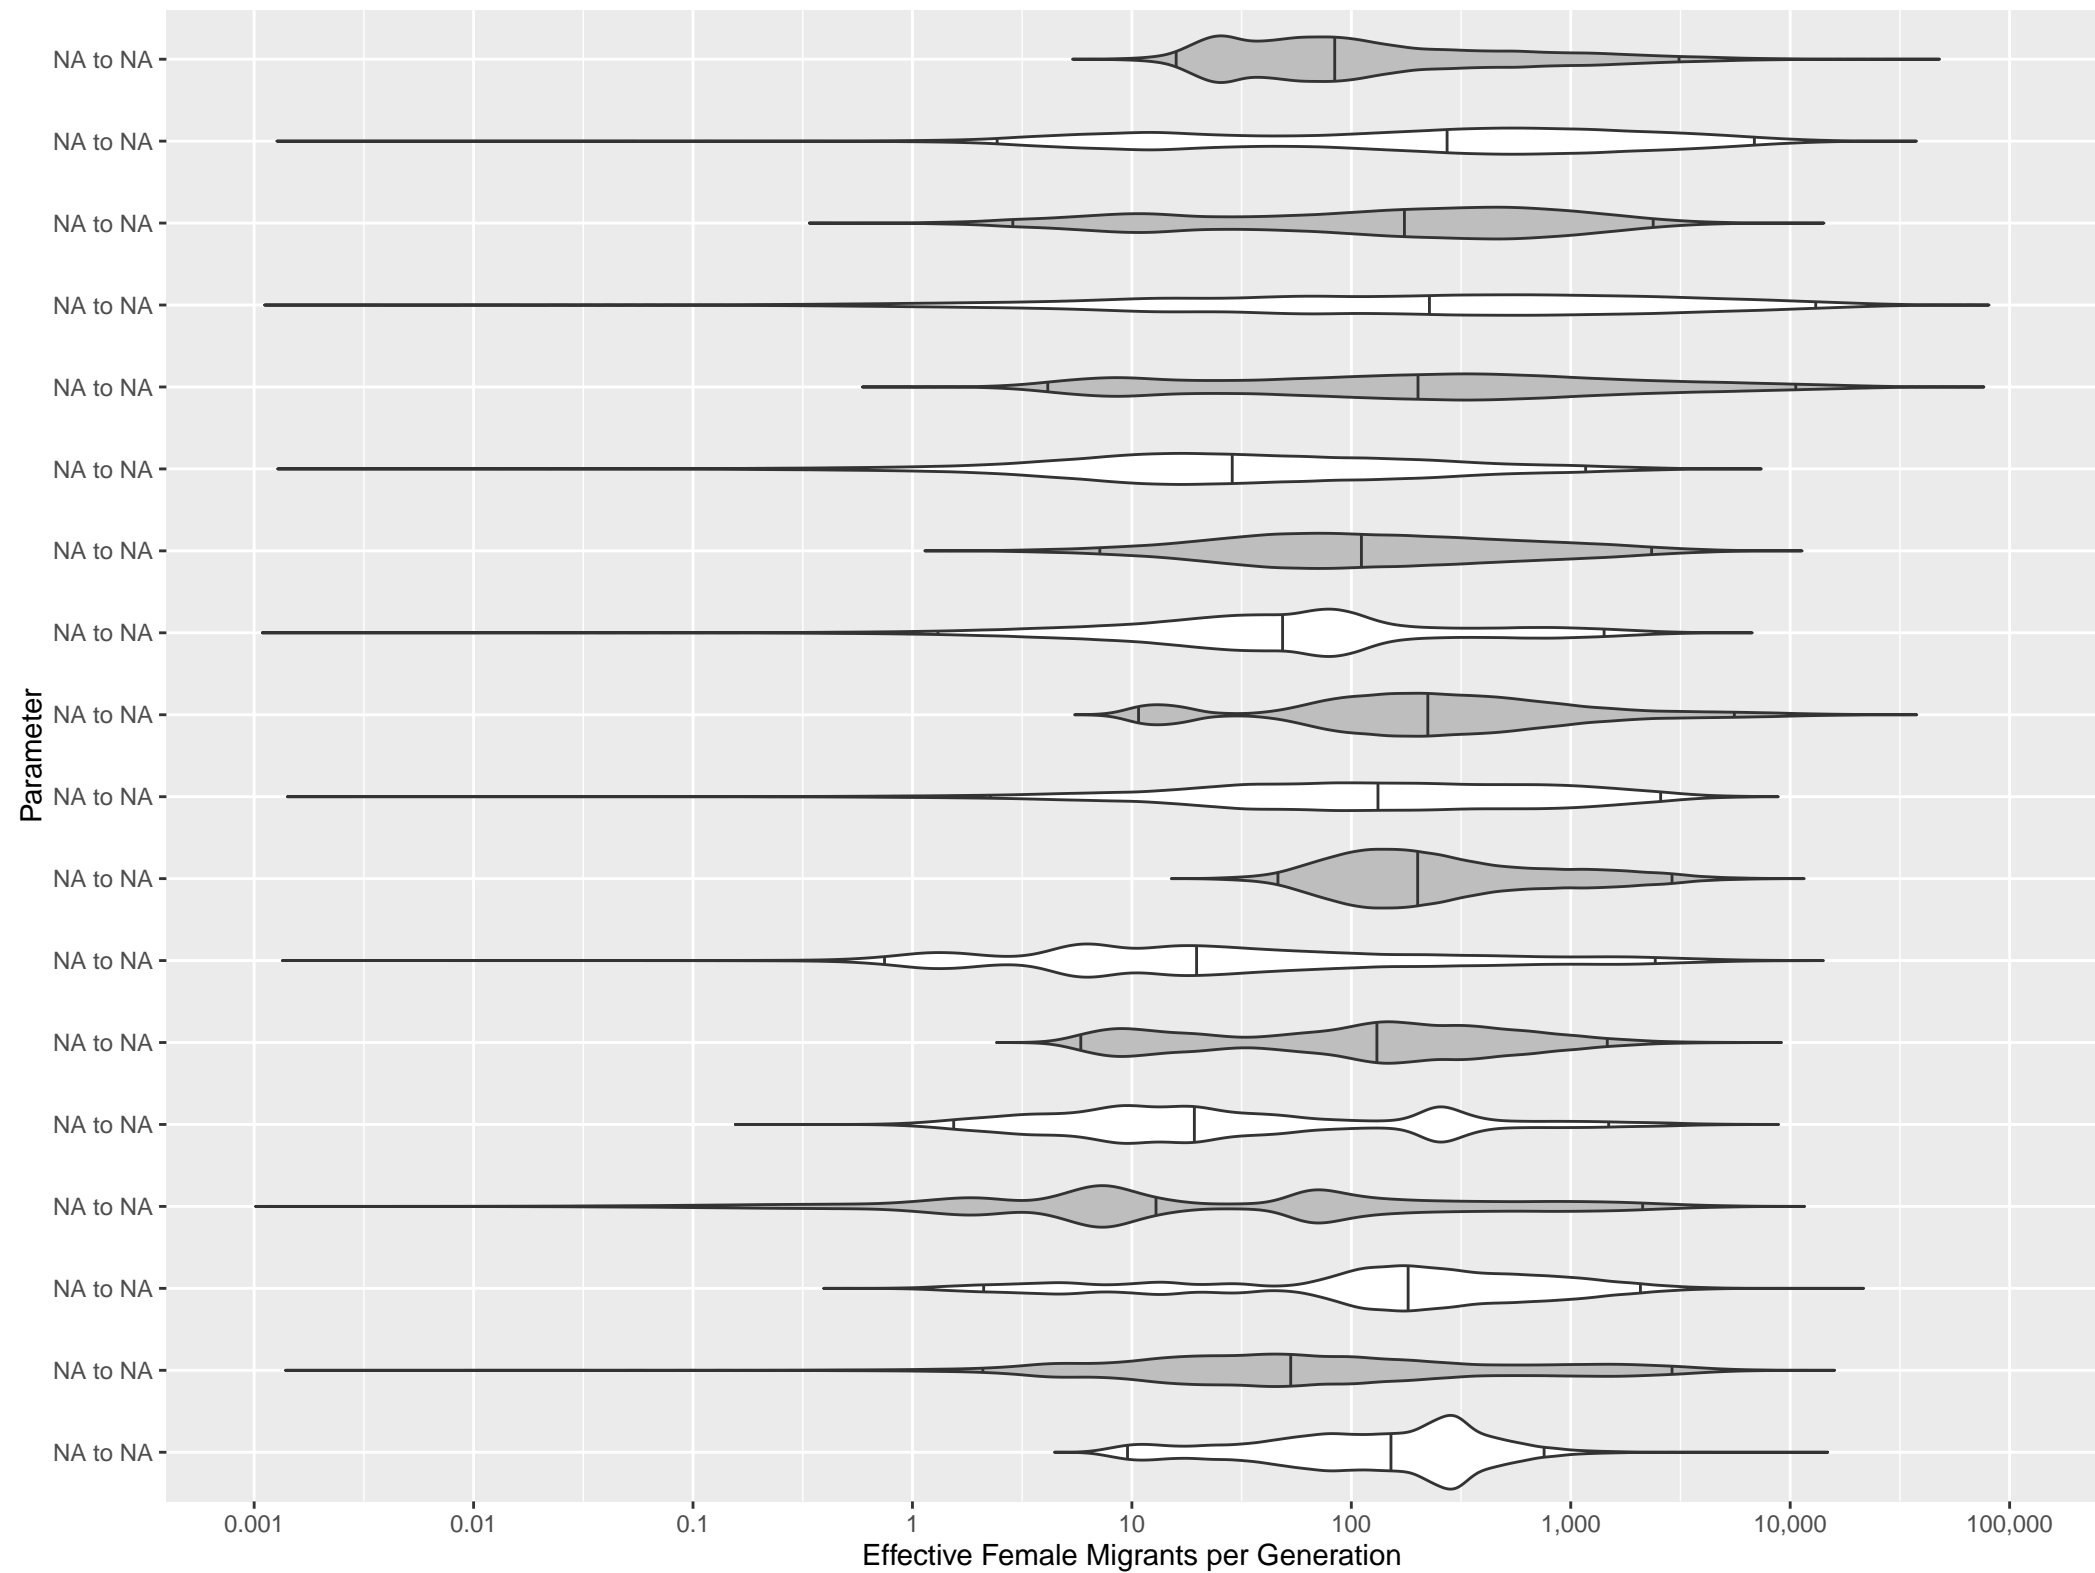

Ophiocoma erinaceus

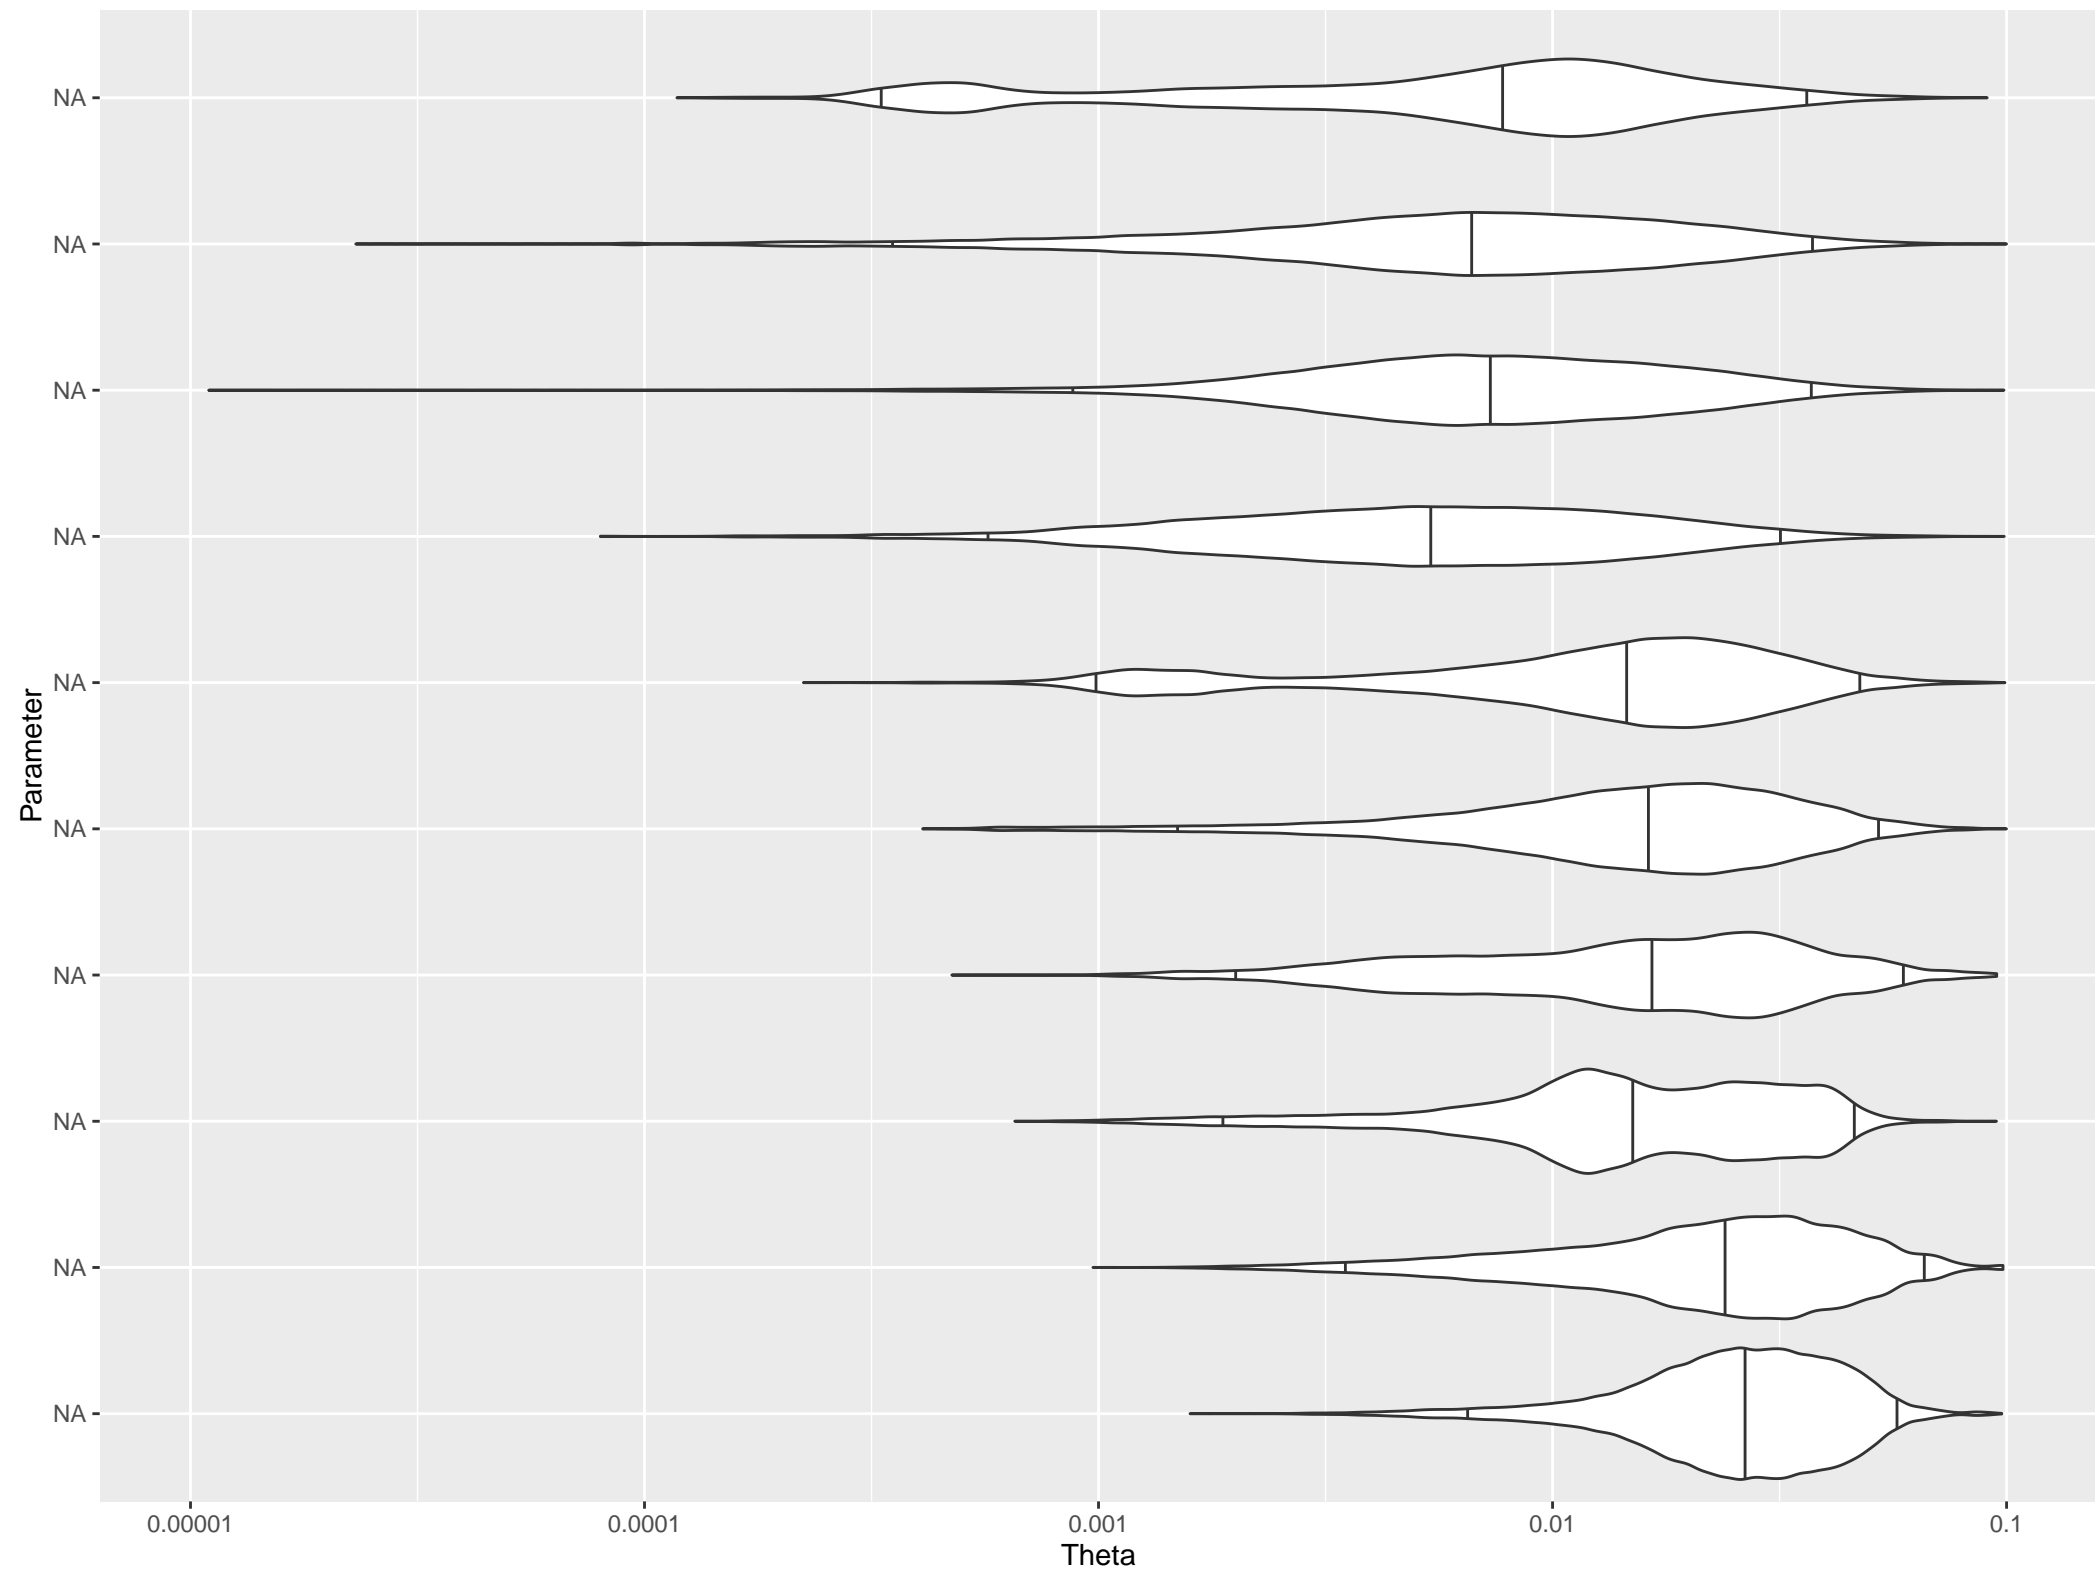

# Ophiocoma pica

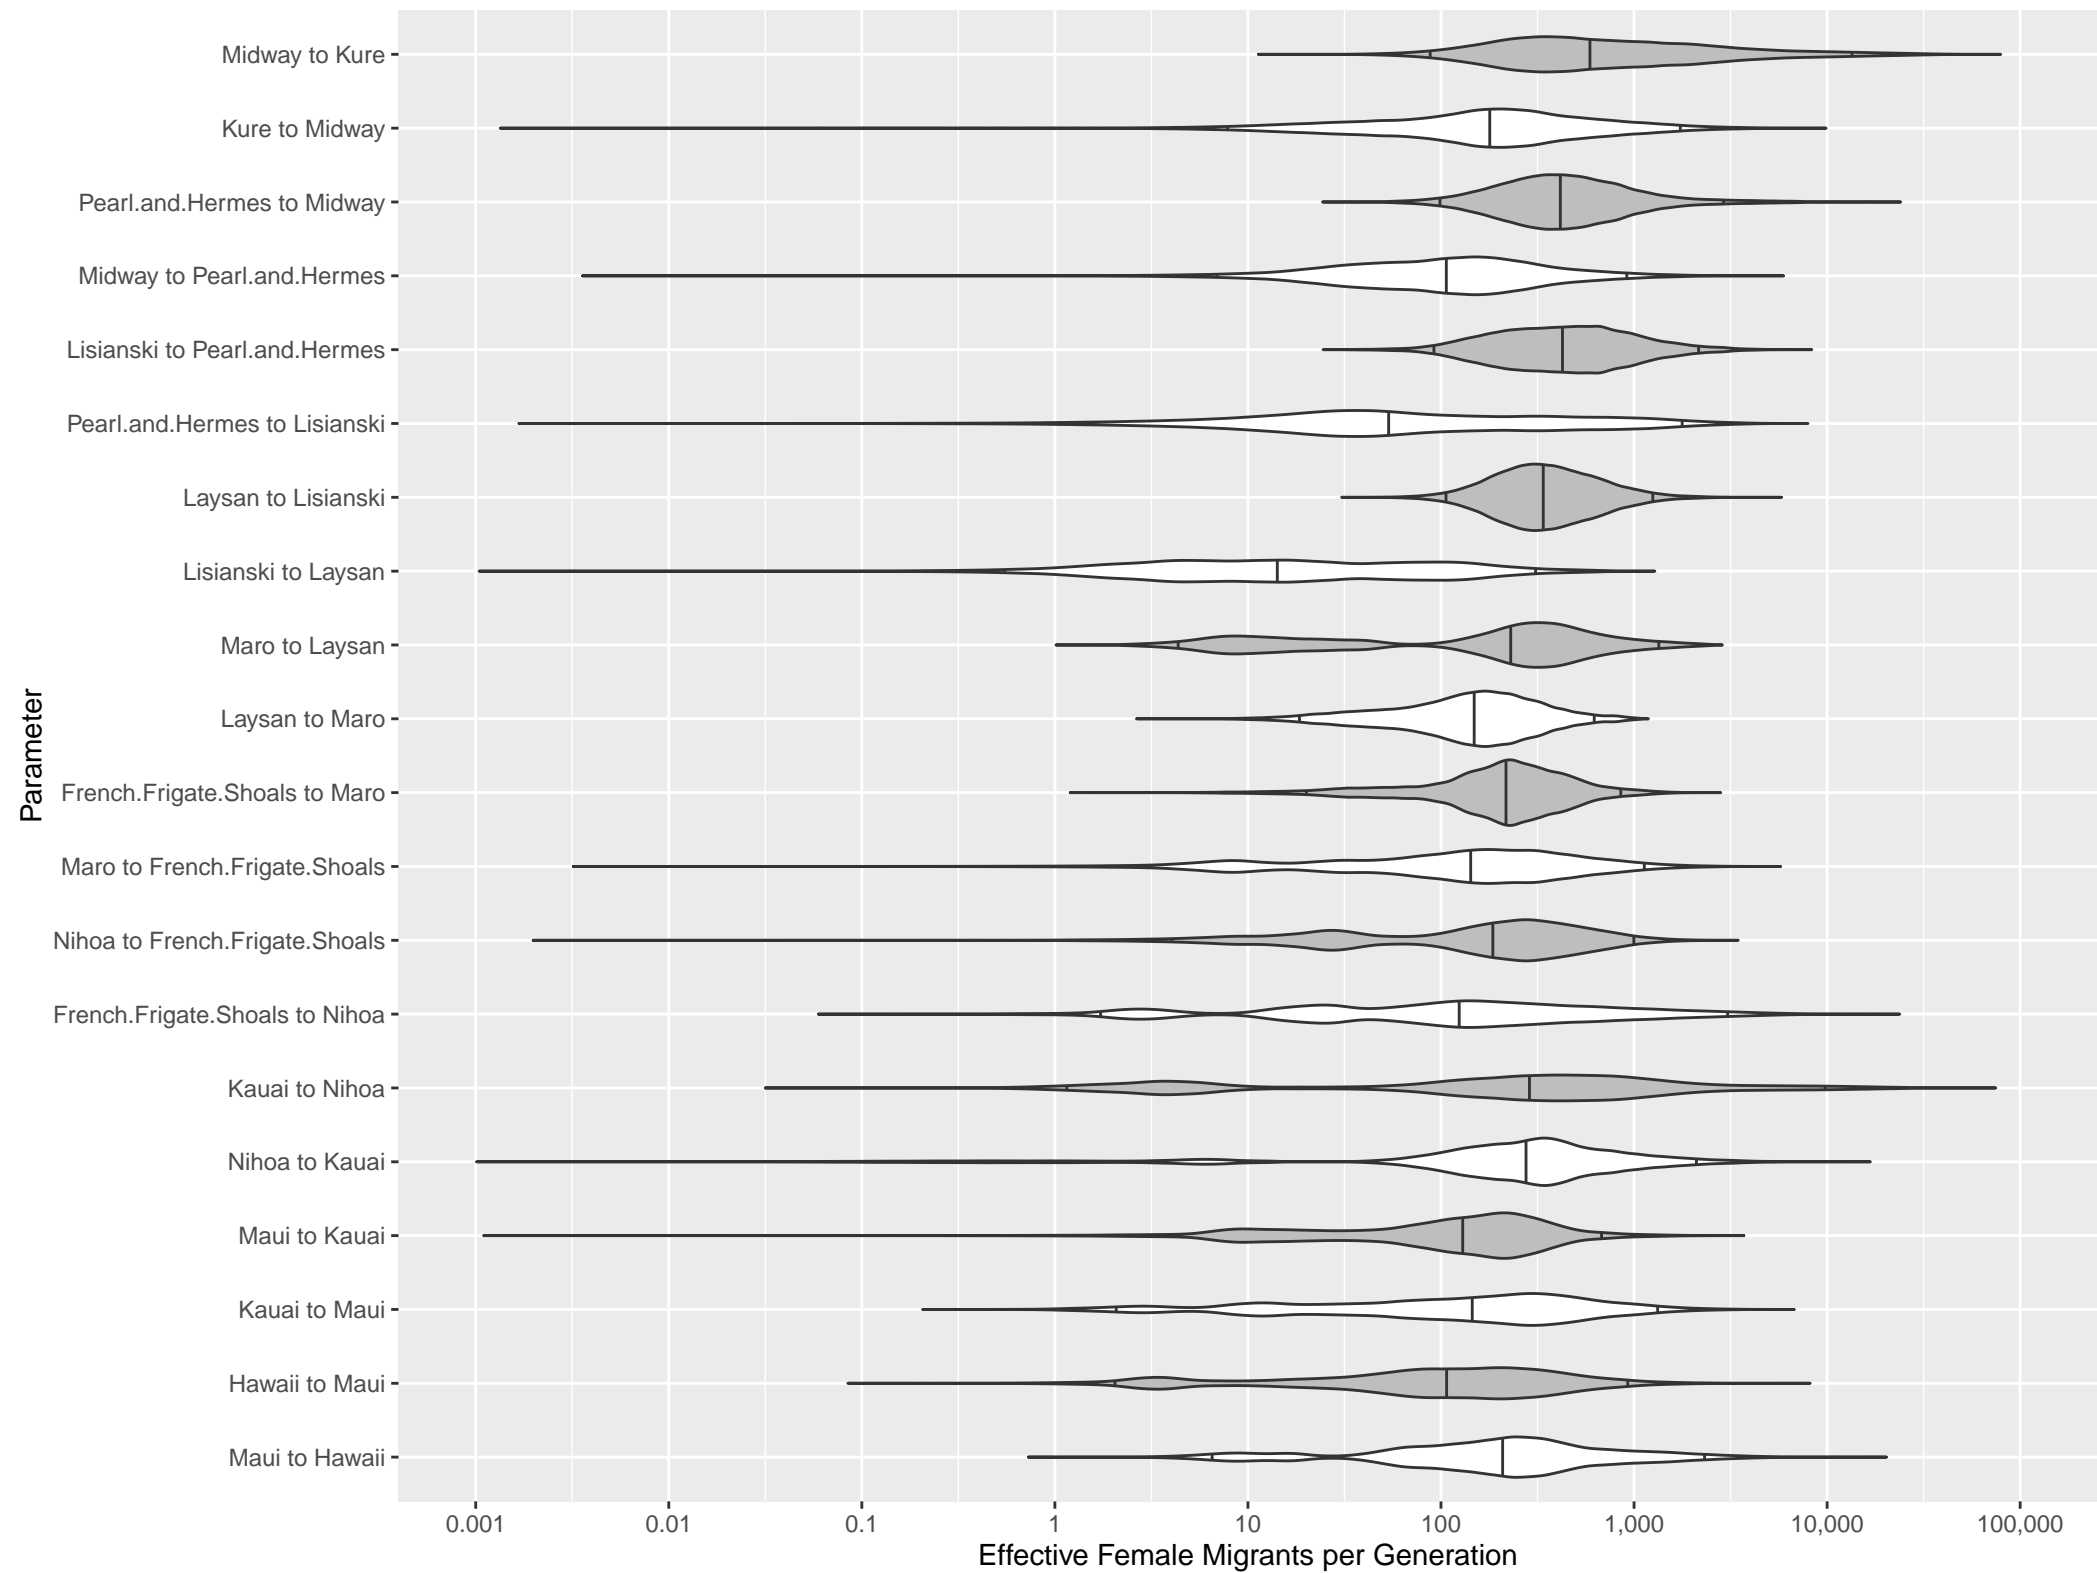

# Ophiocoma pica

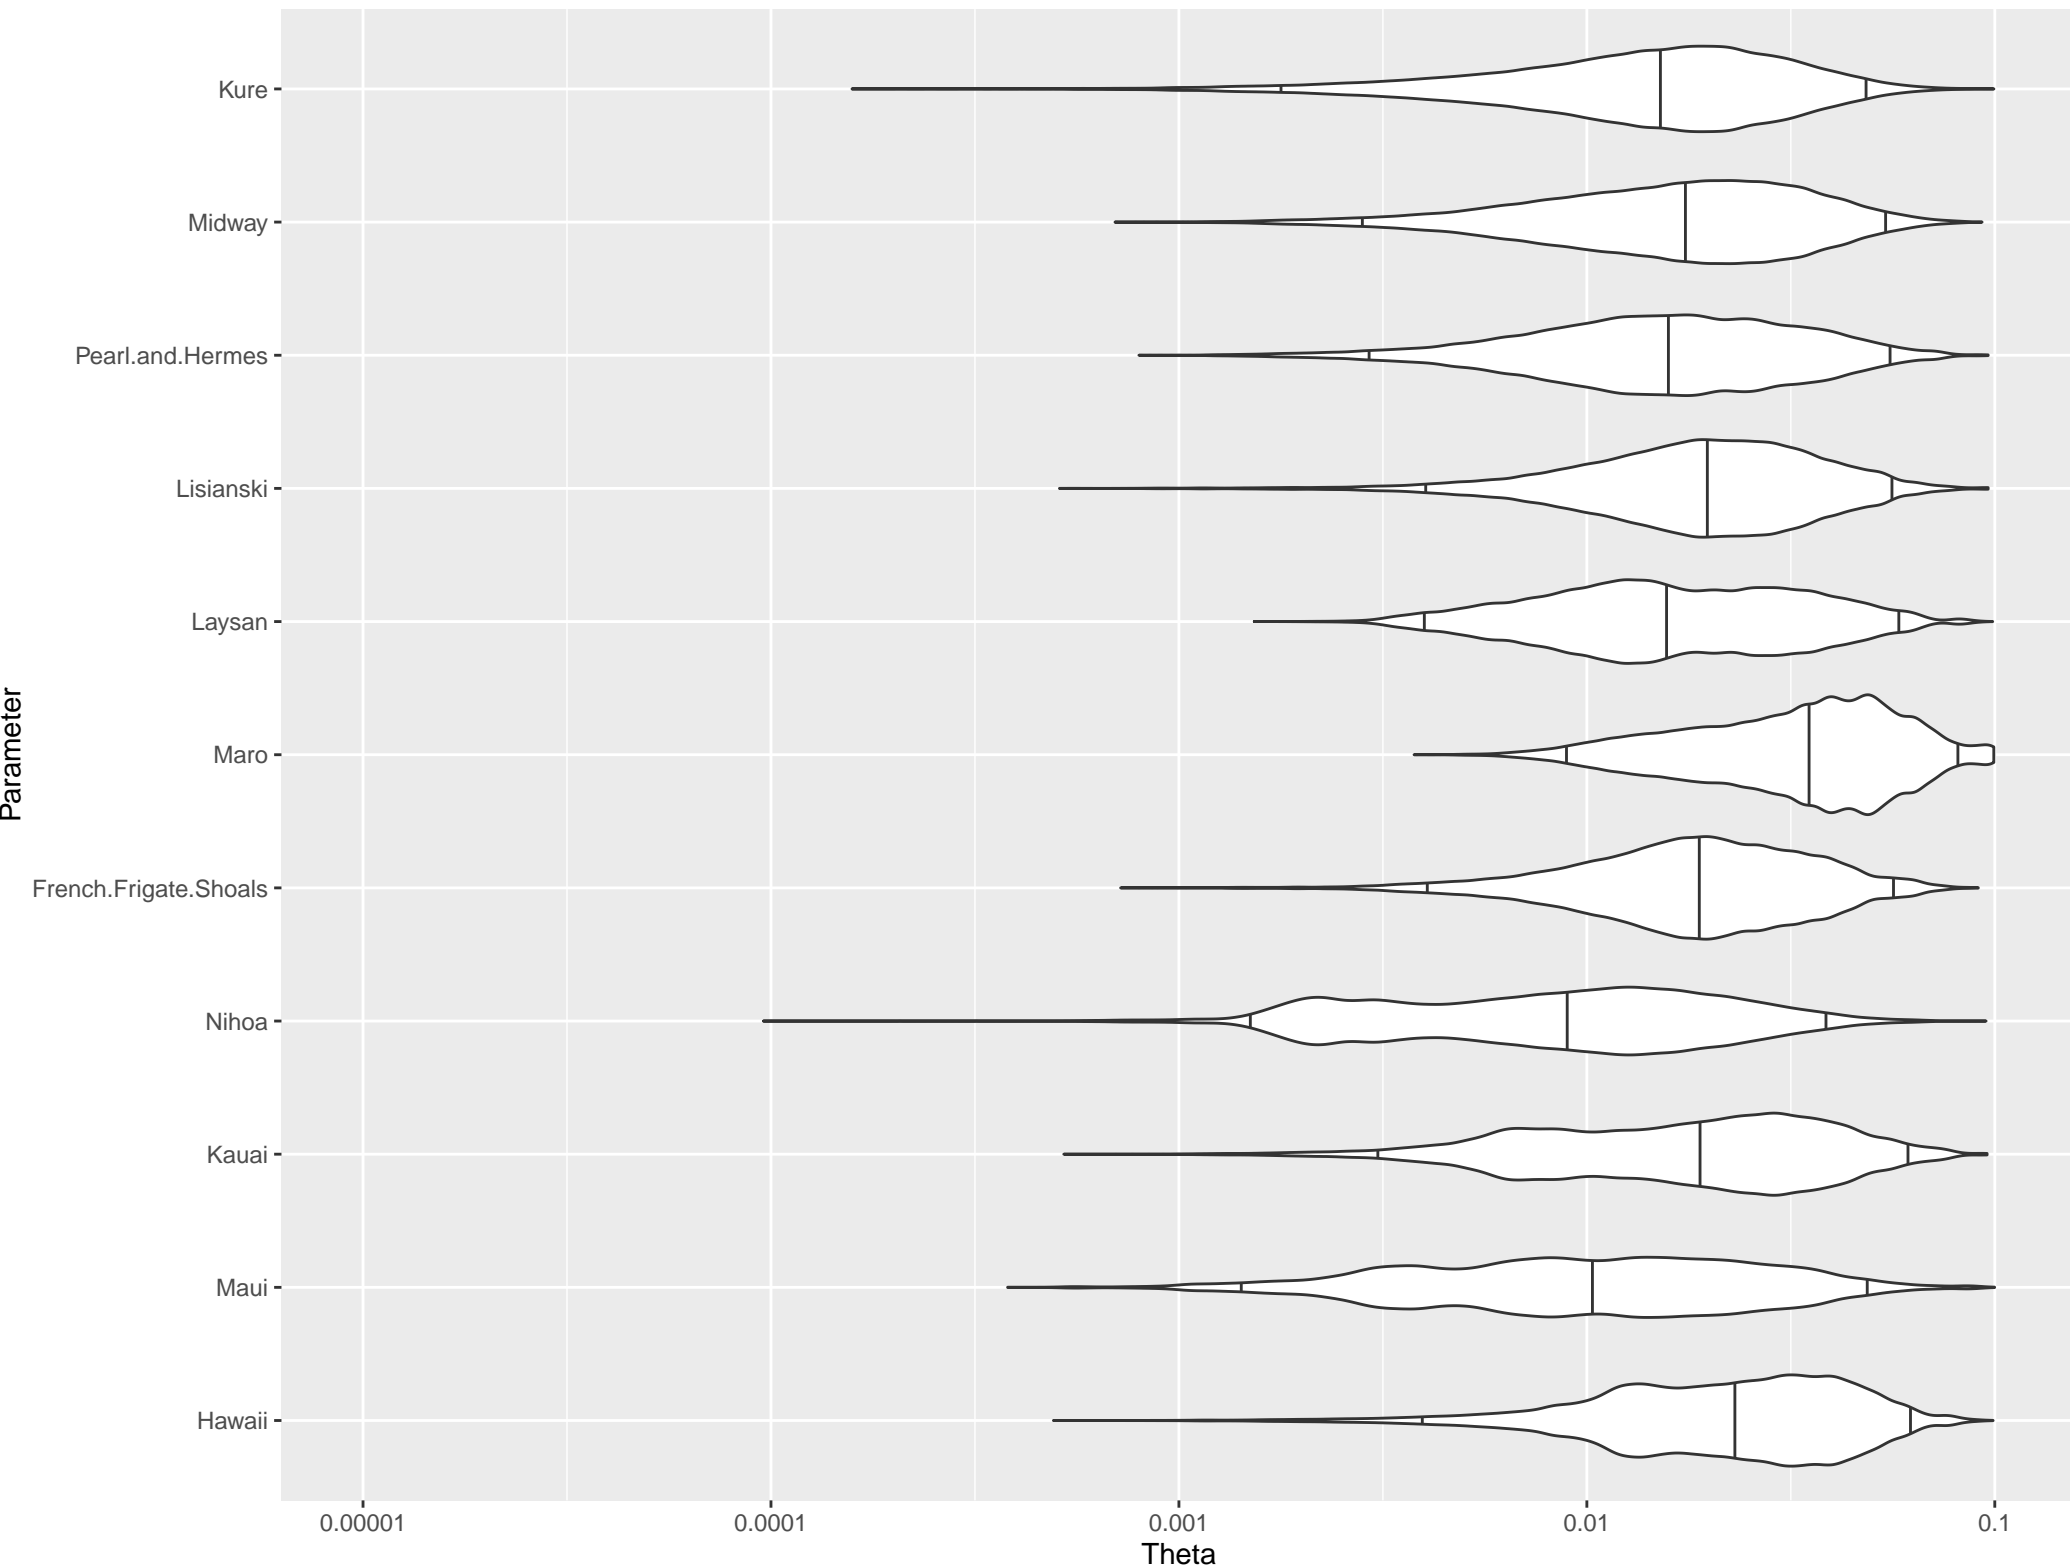

Panulirus marginatus

Parameter

Oahu to Maui

0.001

0.01

0.1

1

10

100

1,000

10,000

100,000

Effective Female Migrants per Generation

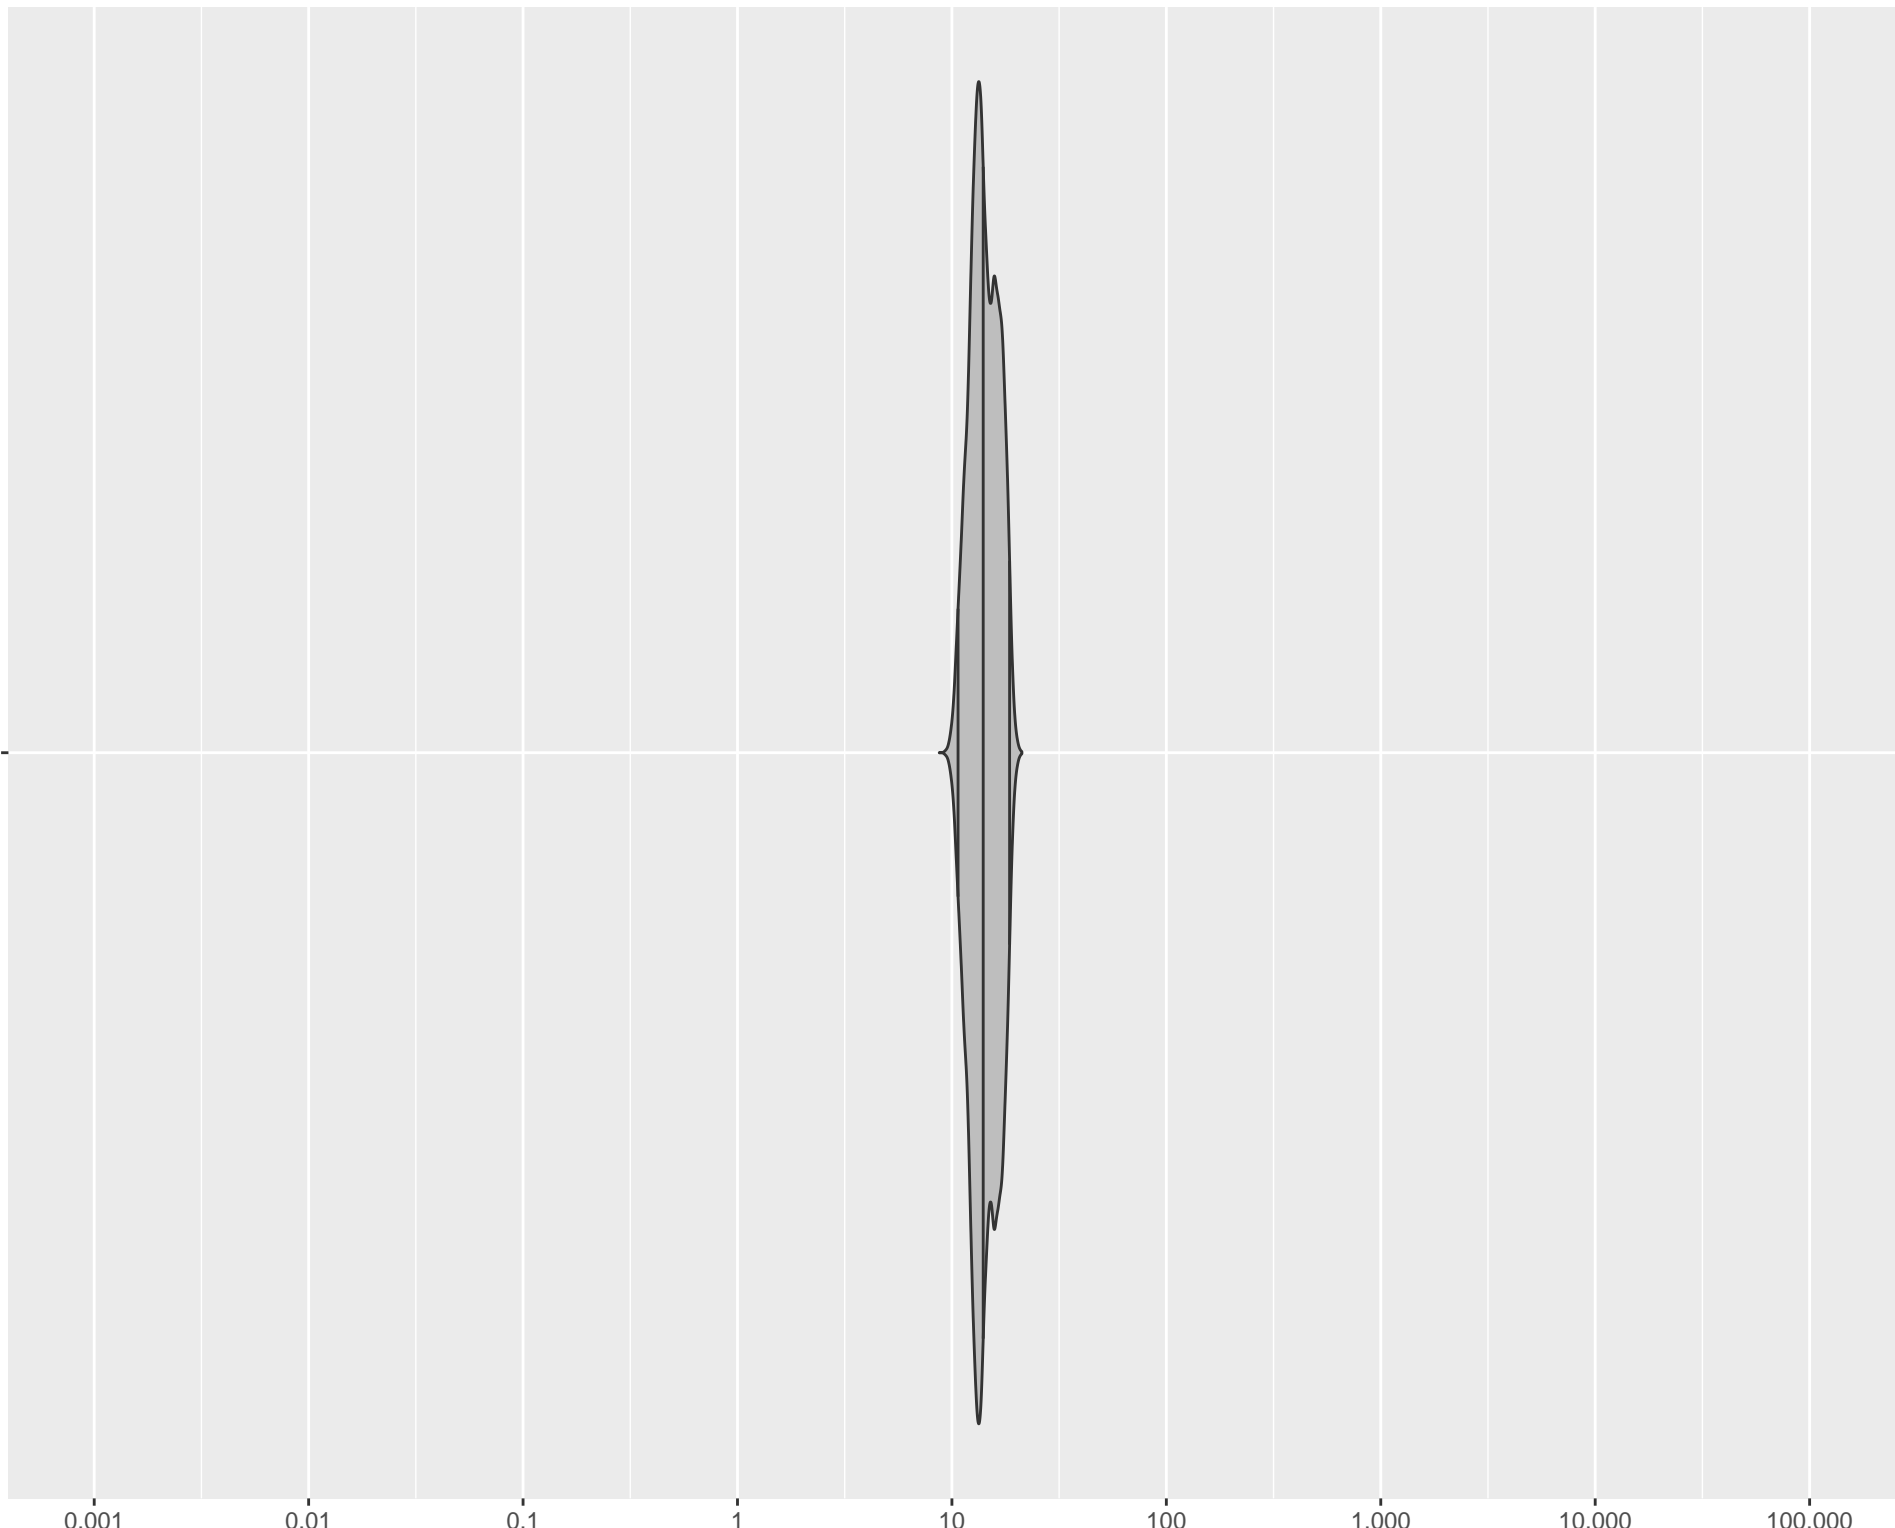



Panulirus marginatus

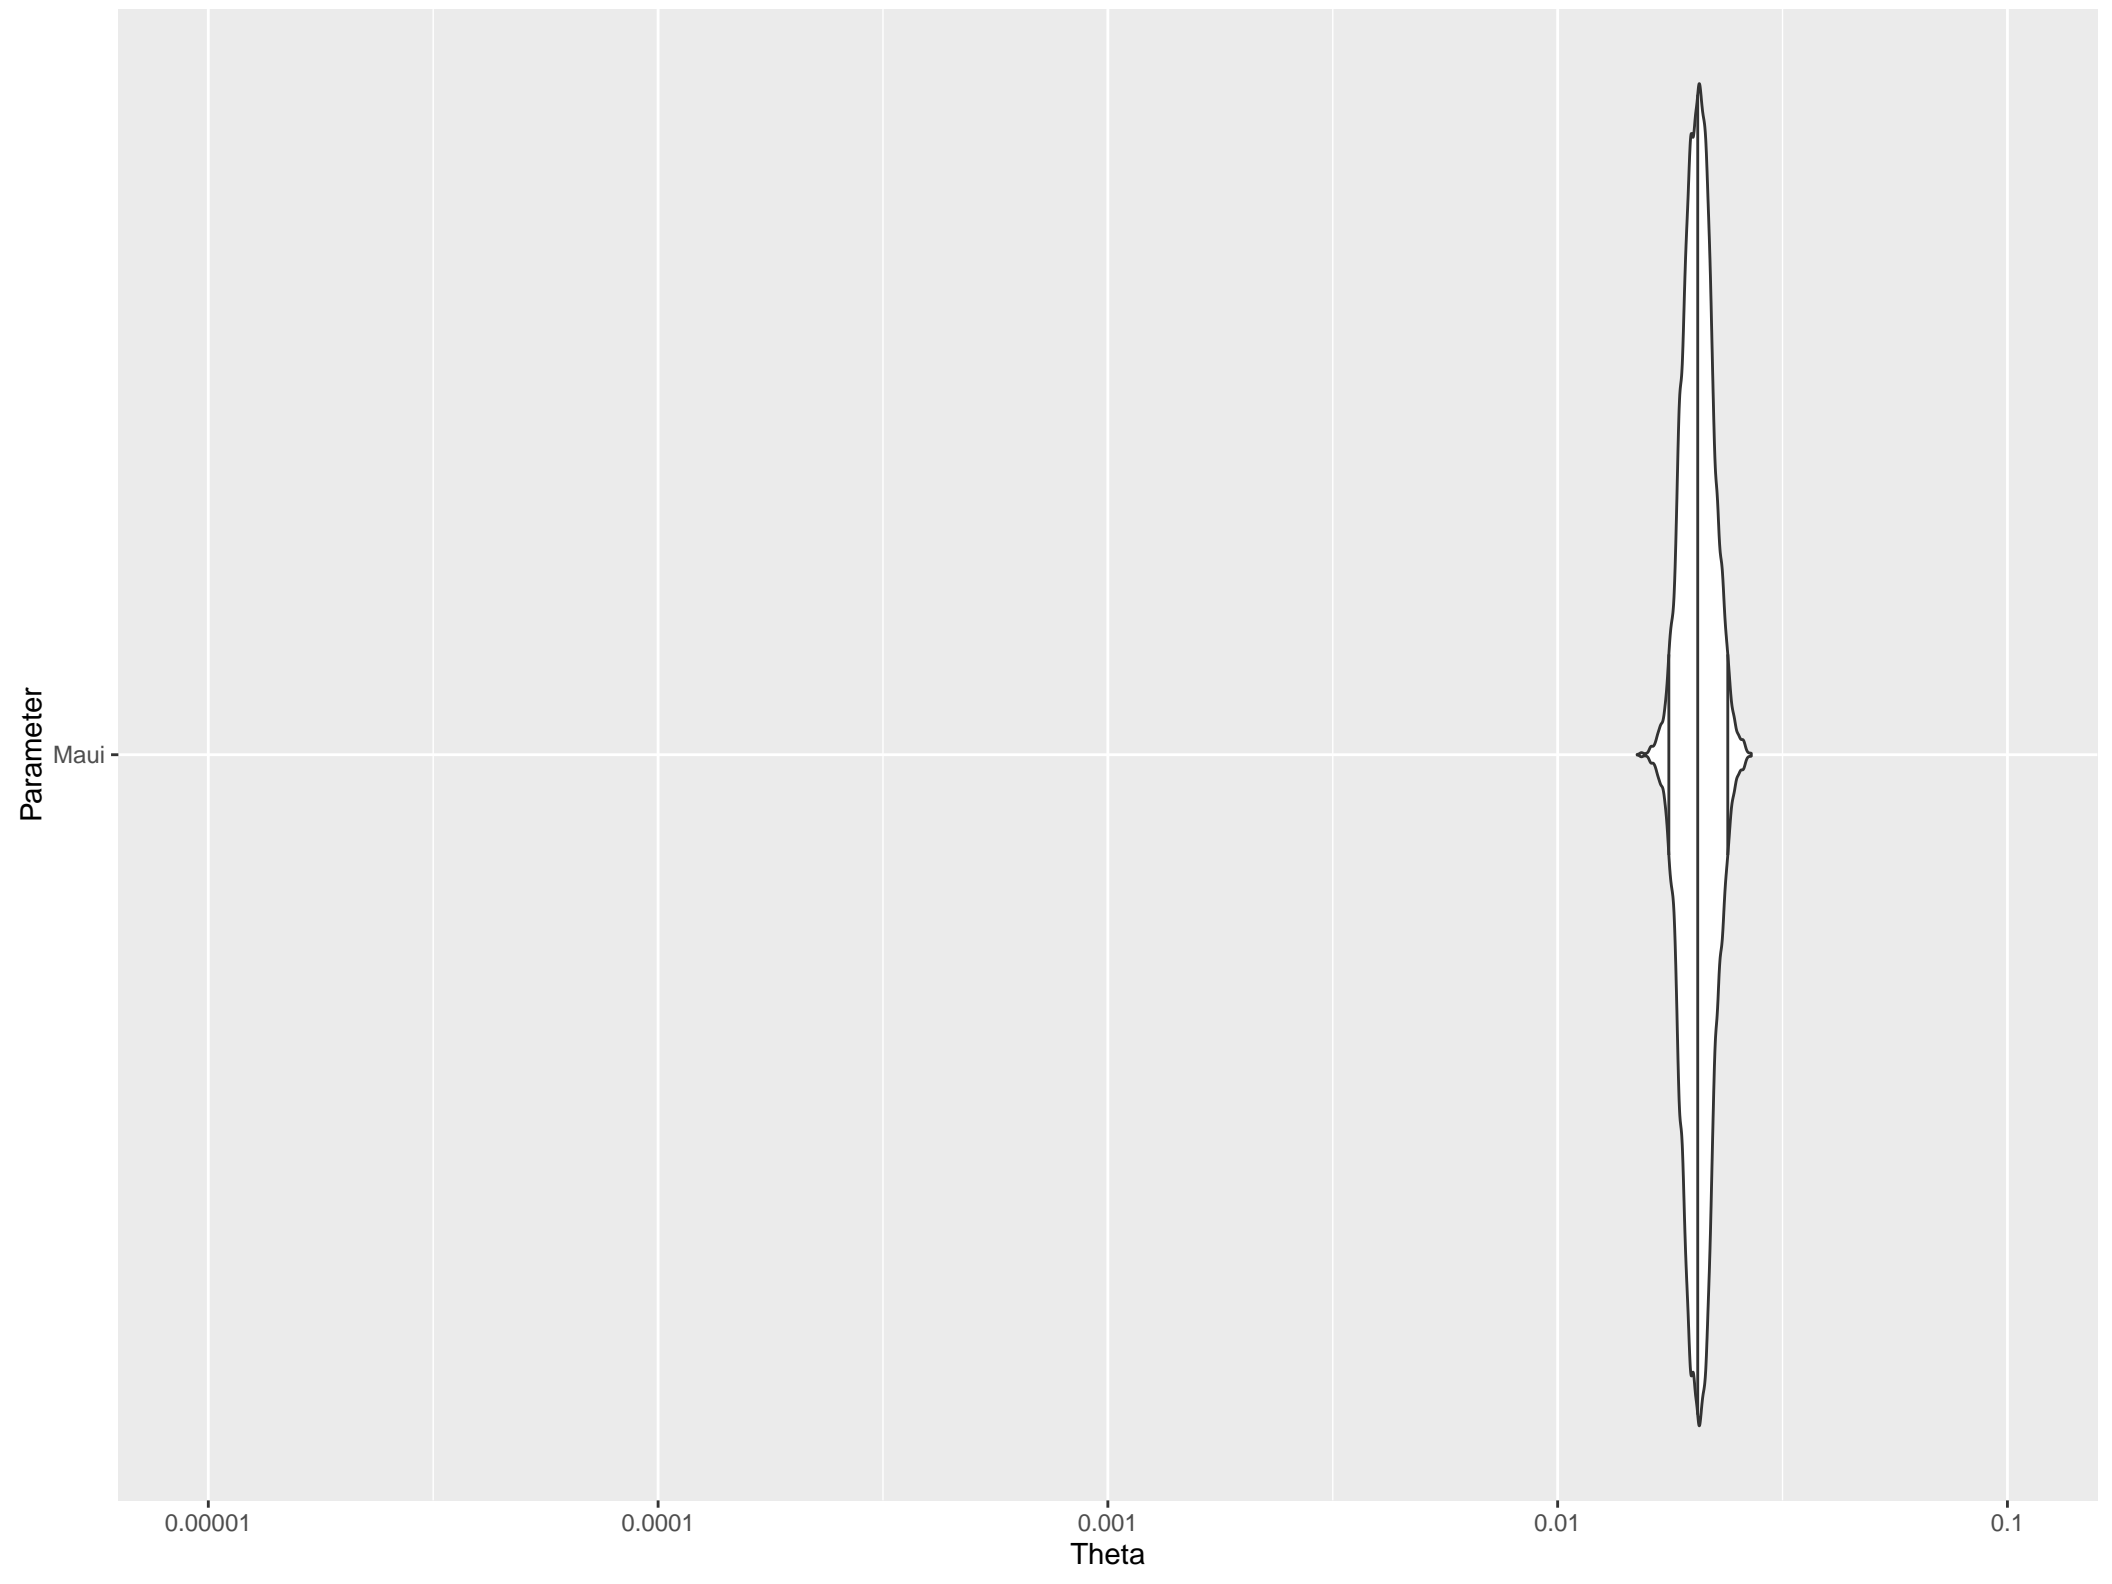

# Panulirus penicillatus

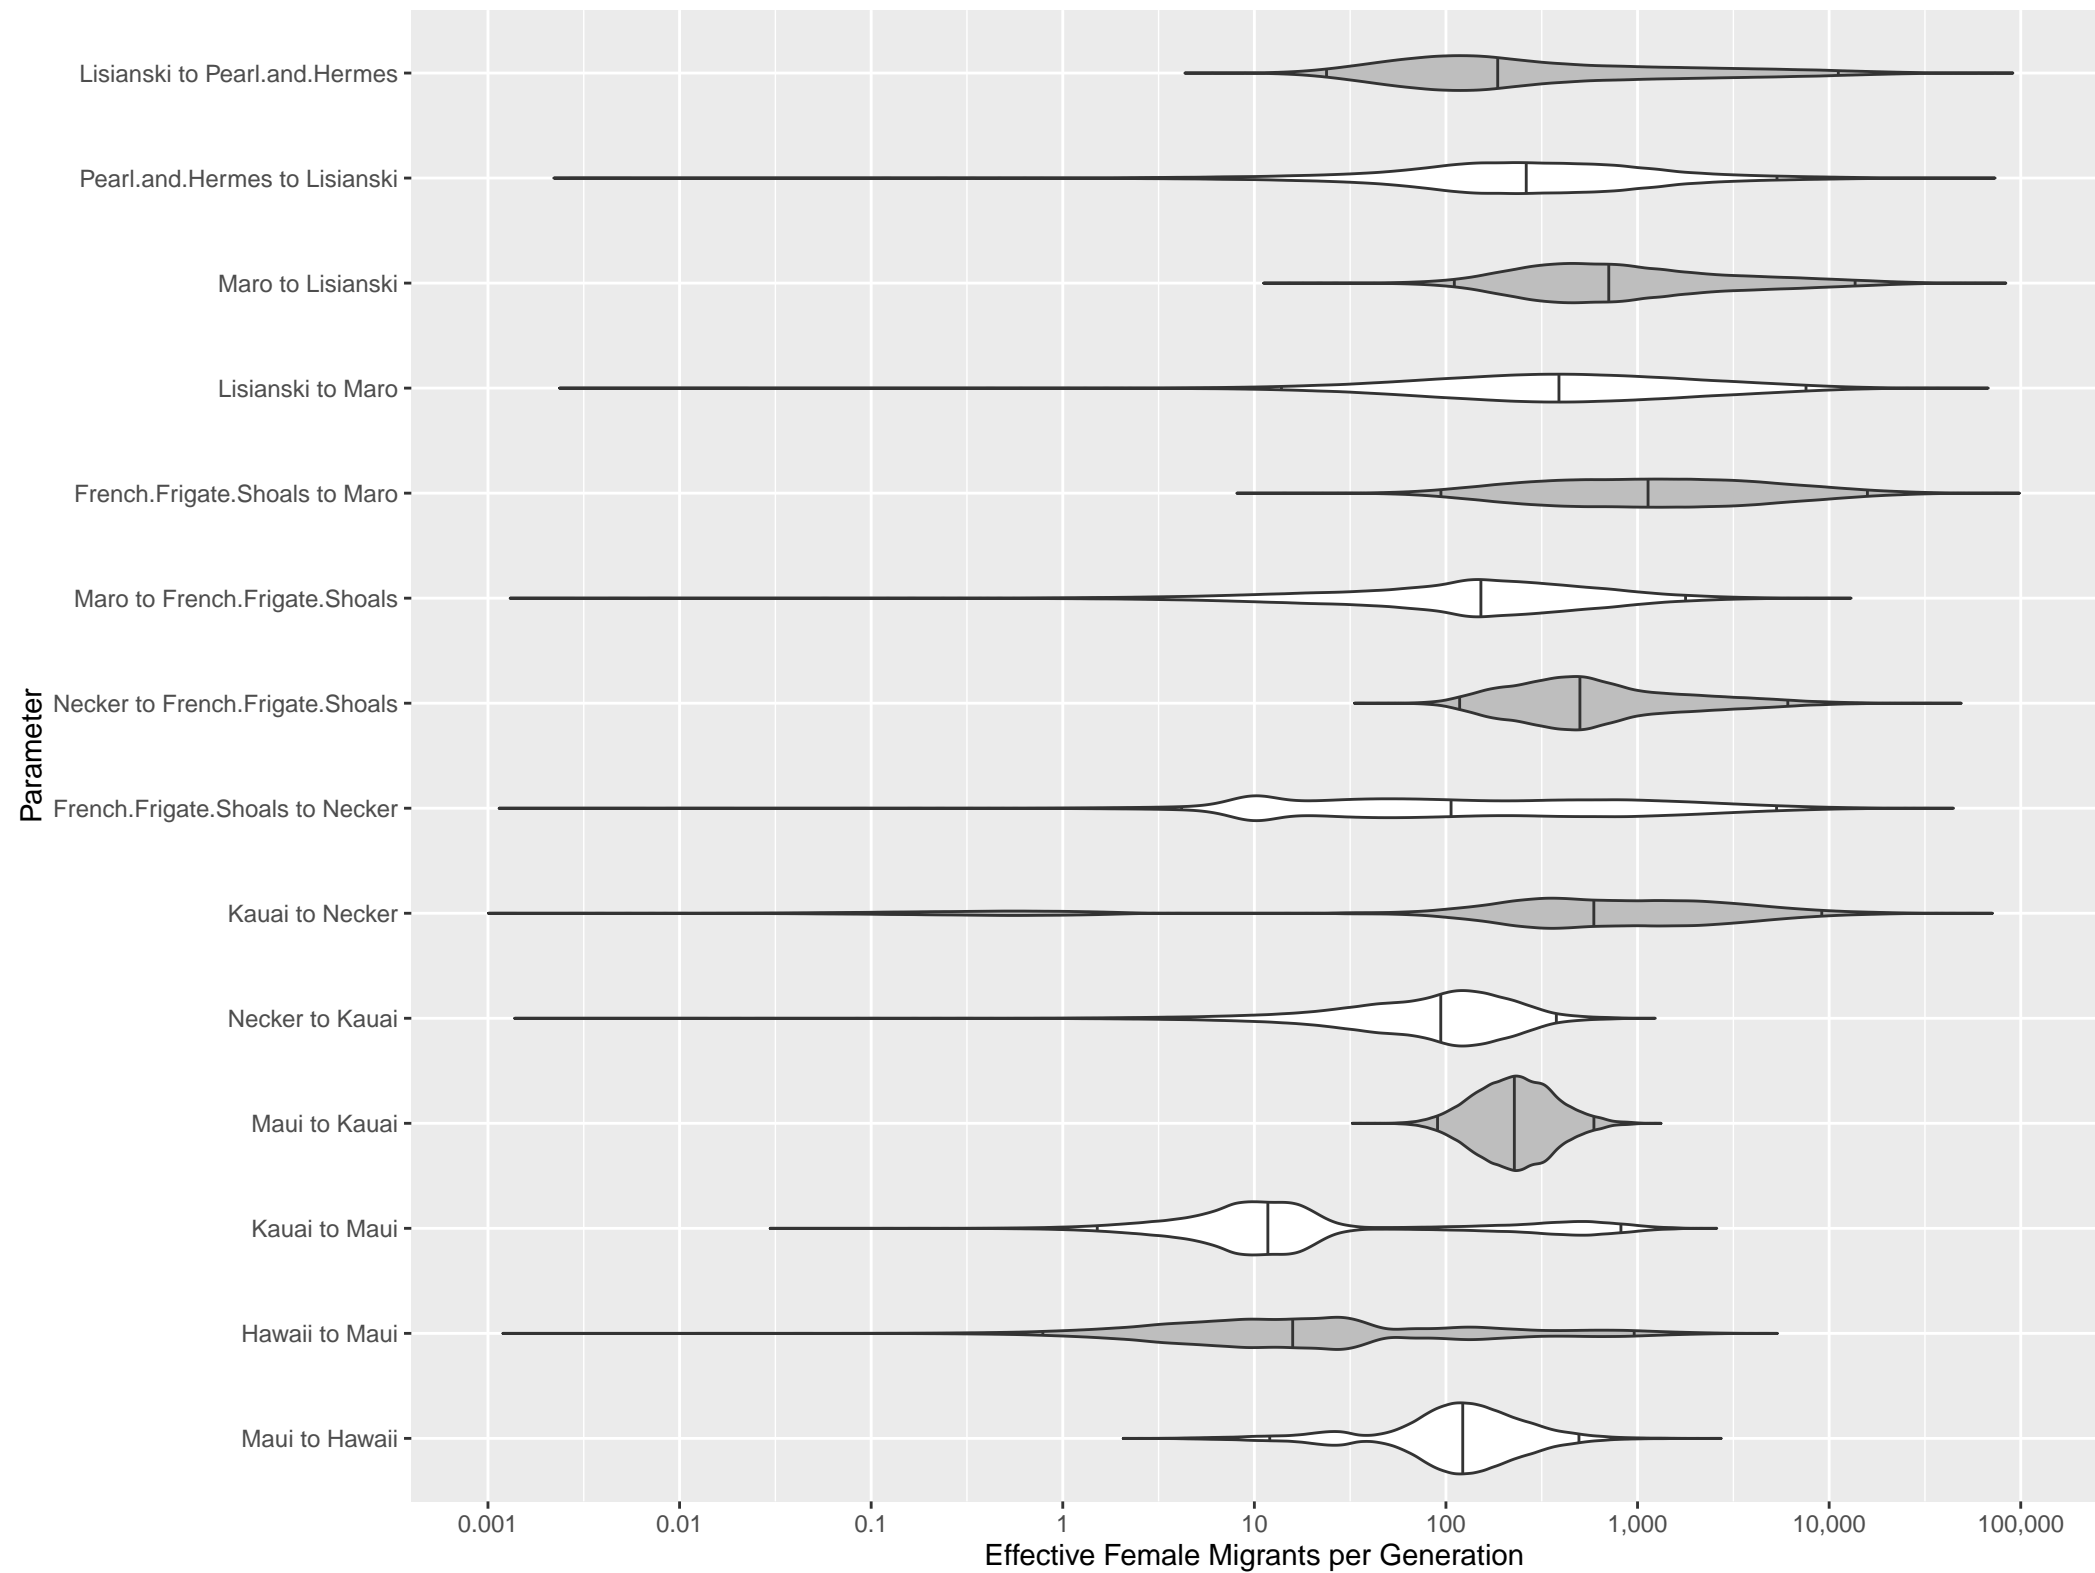

# Panulirus penicillatus

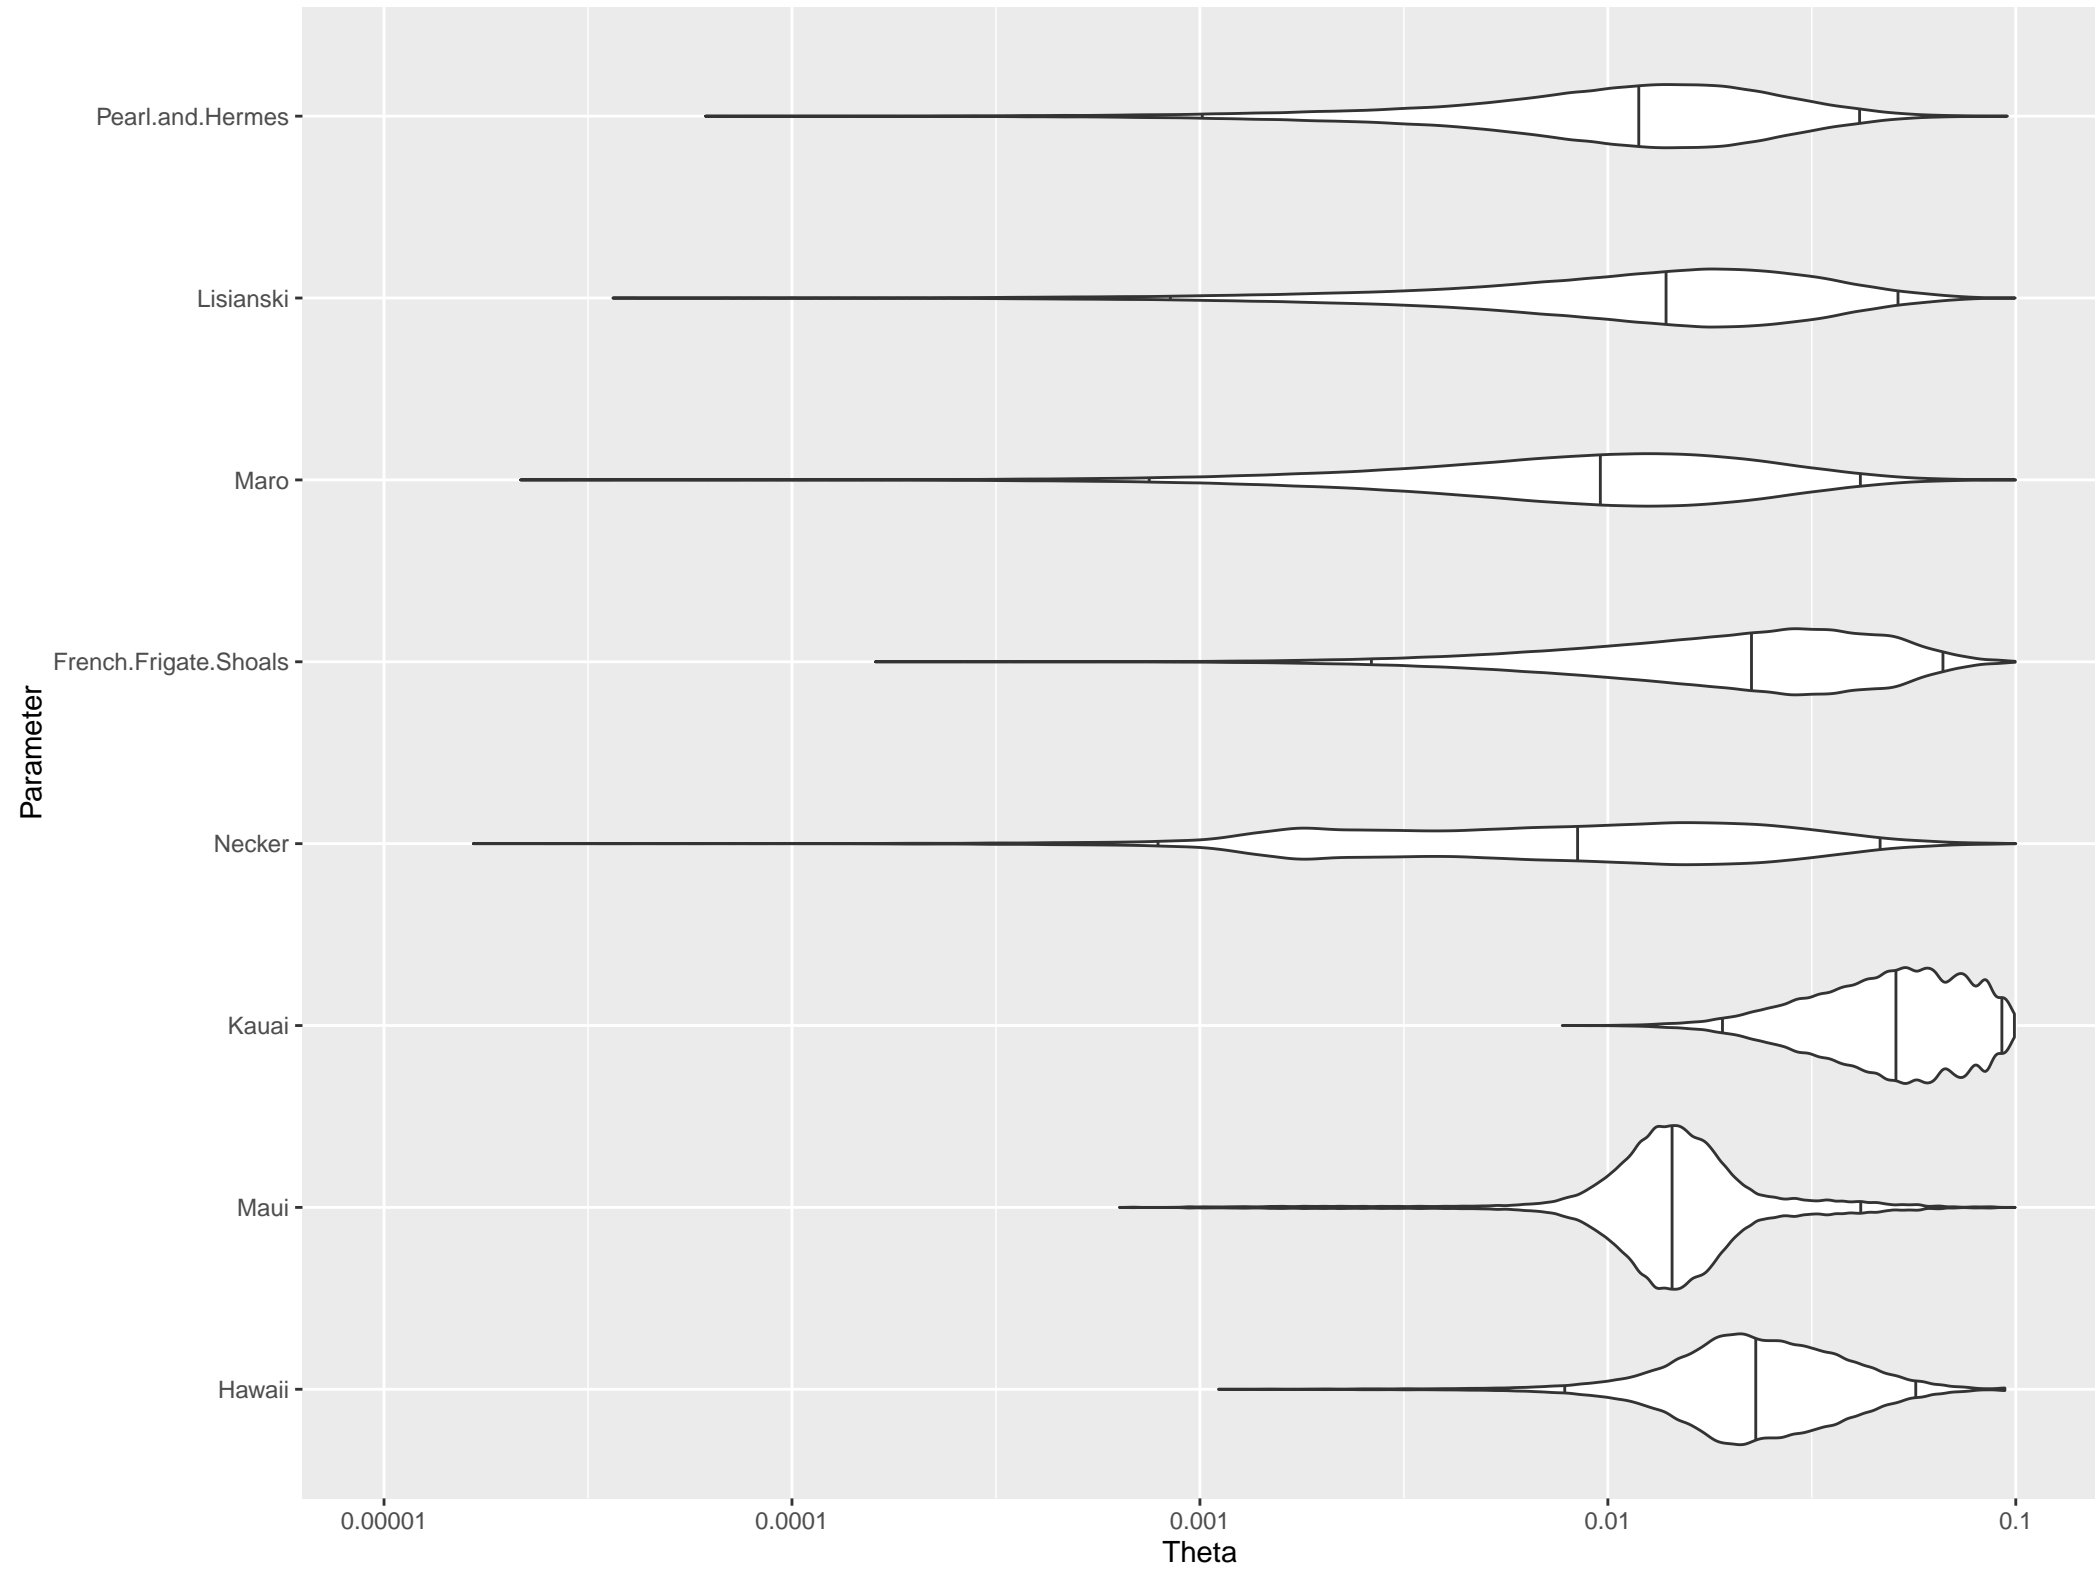

# Parupeneus multifasciatus

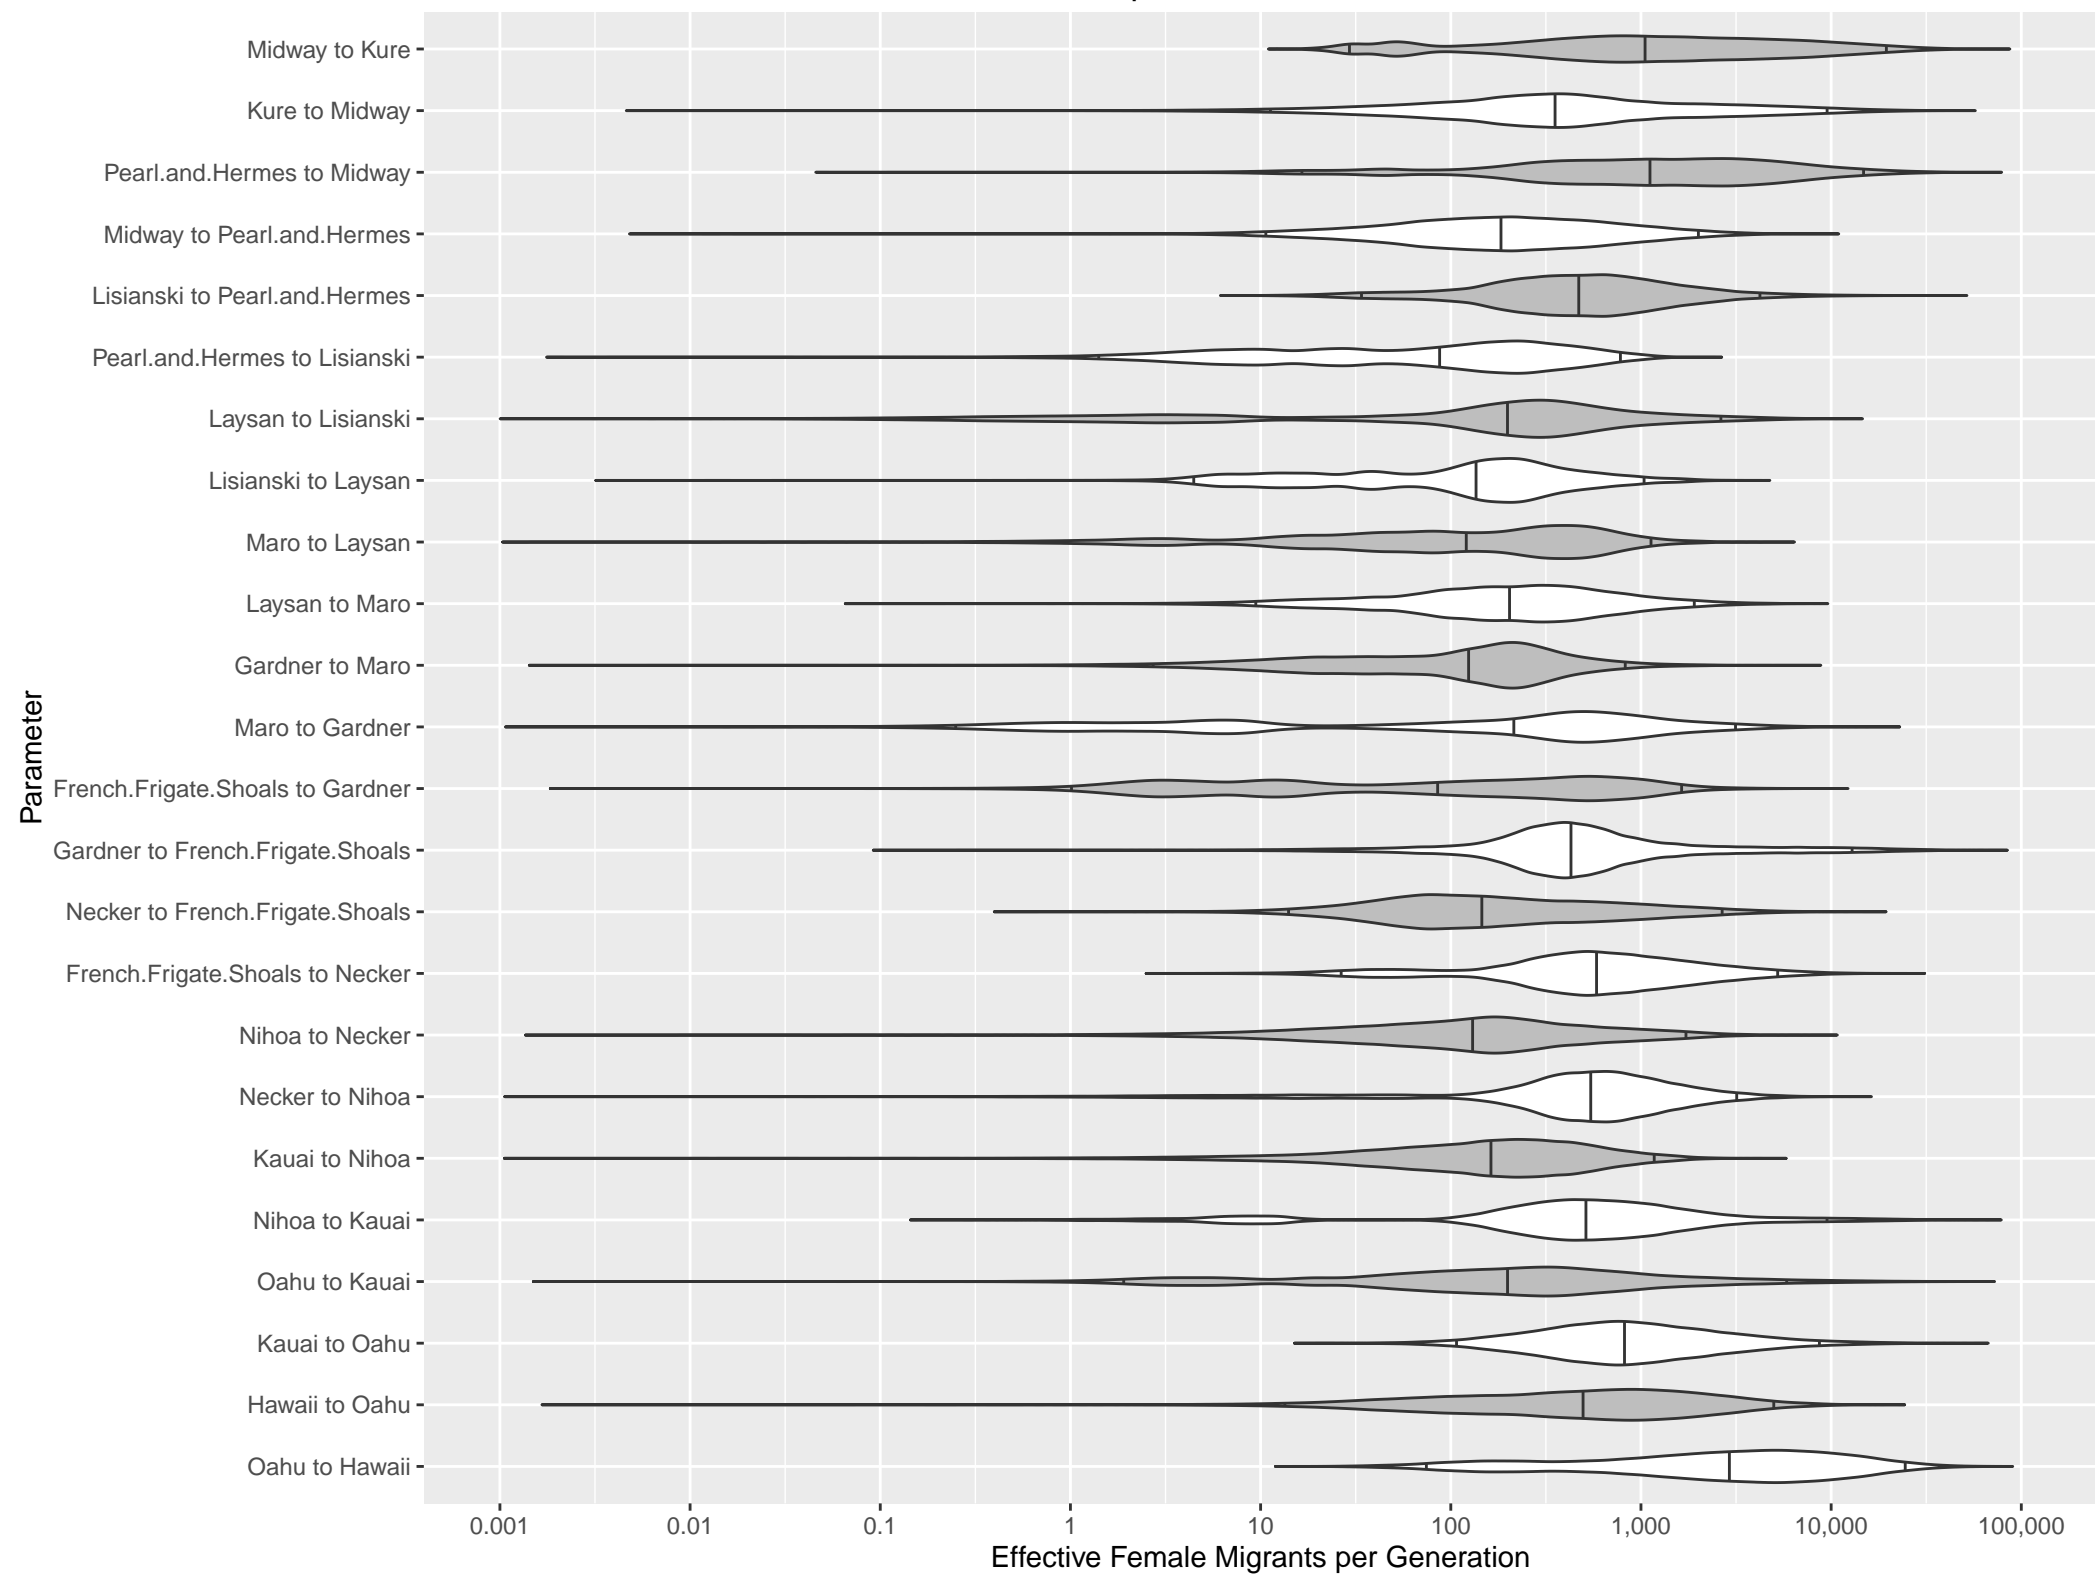

# Parupeneus multifasciatus

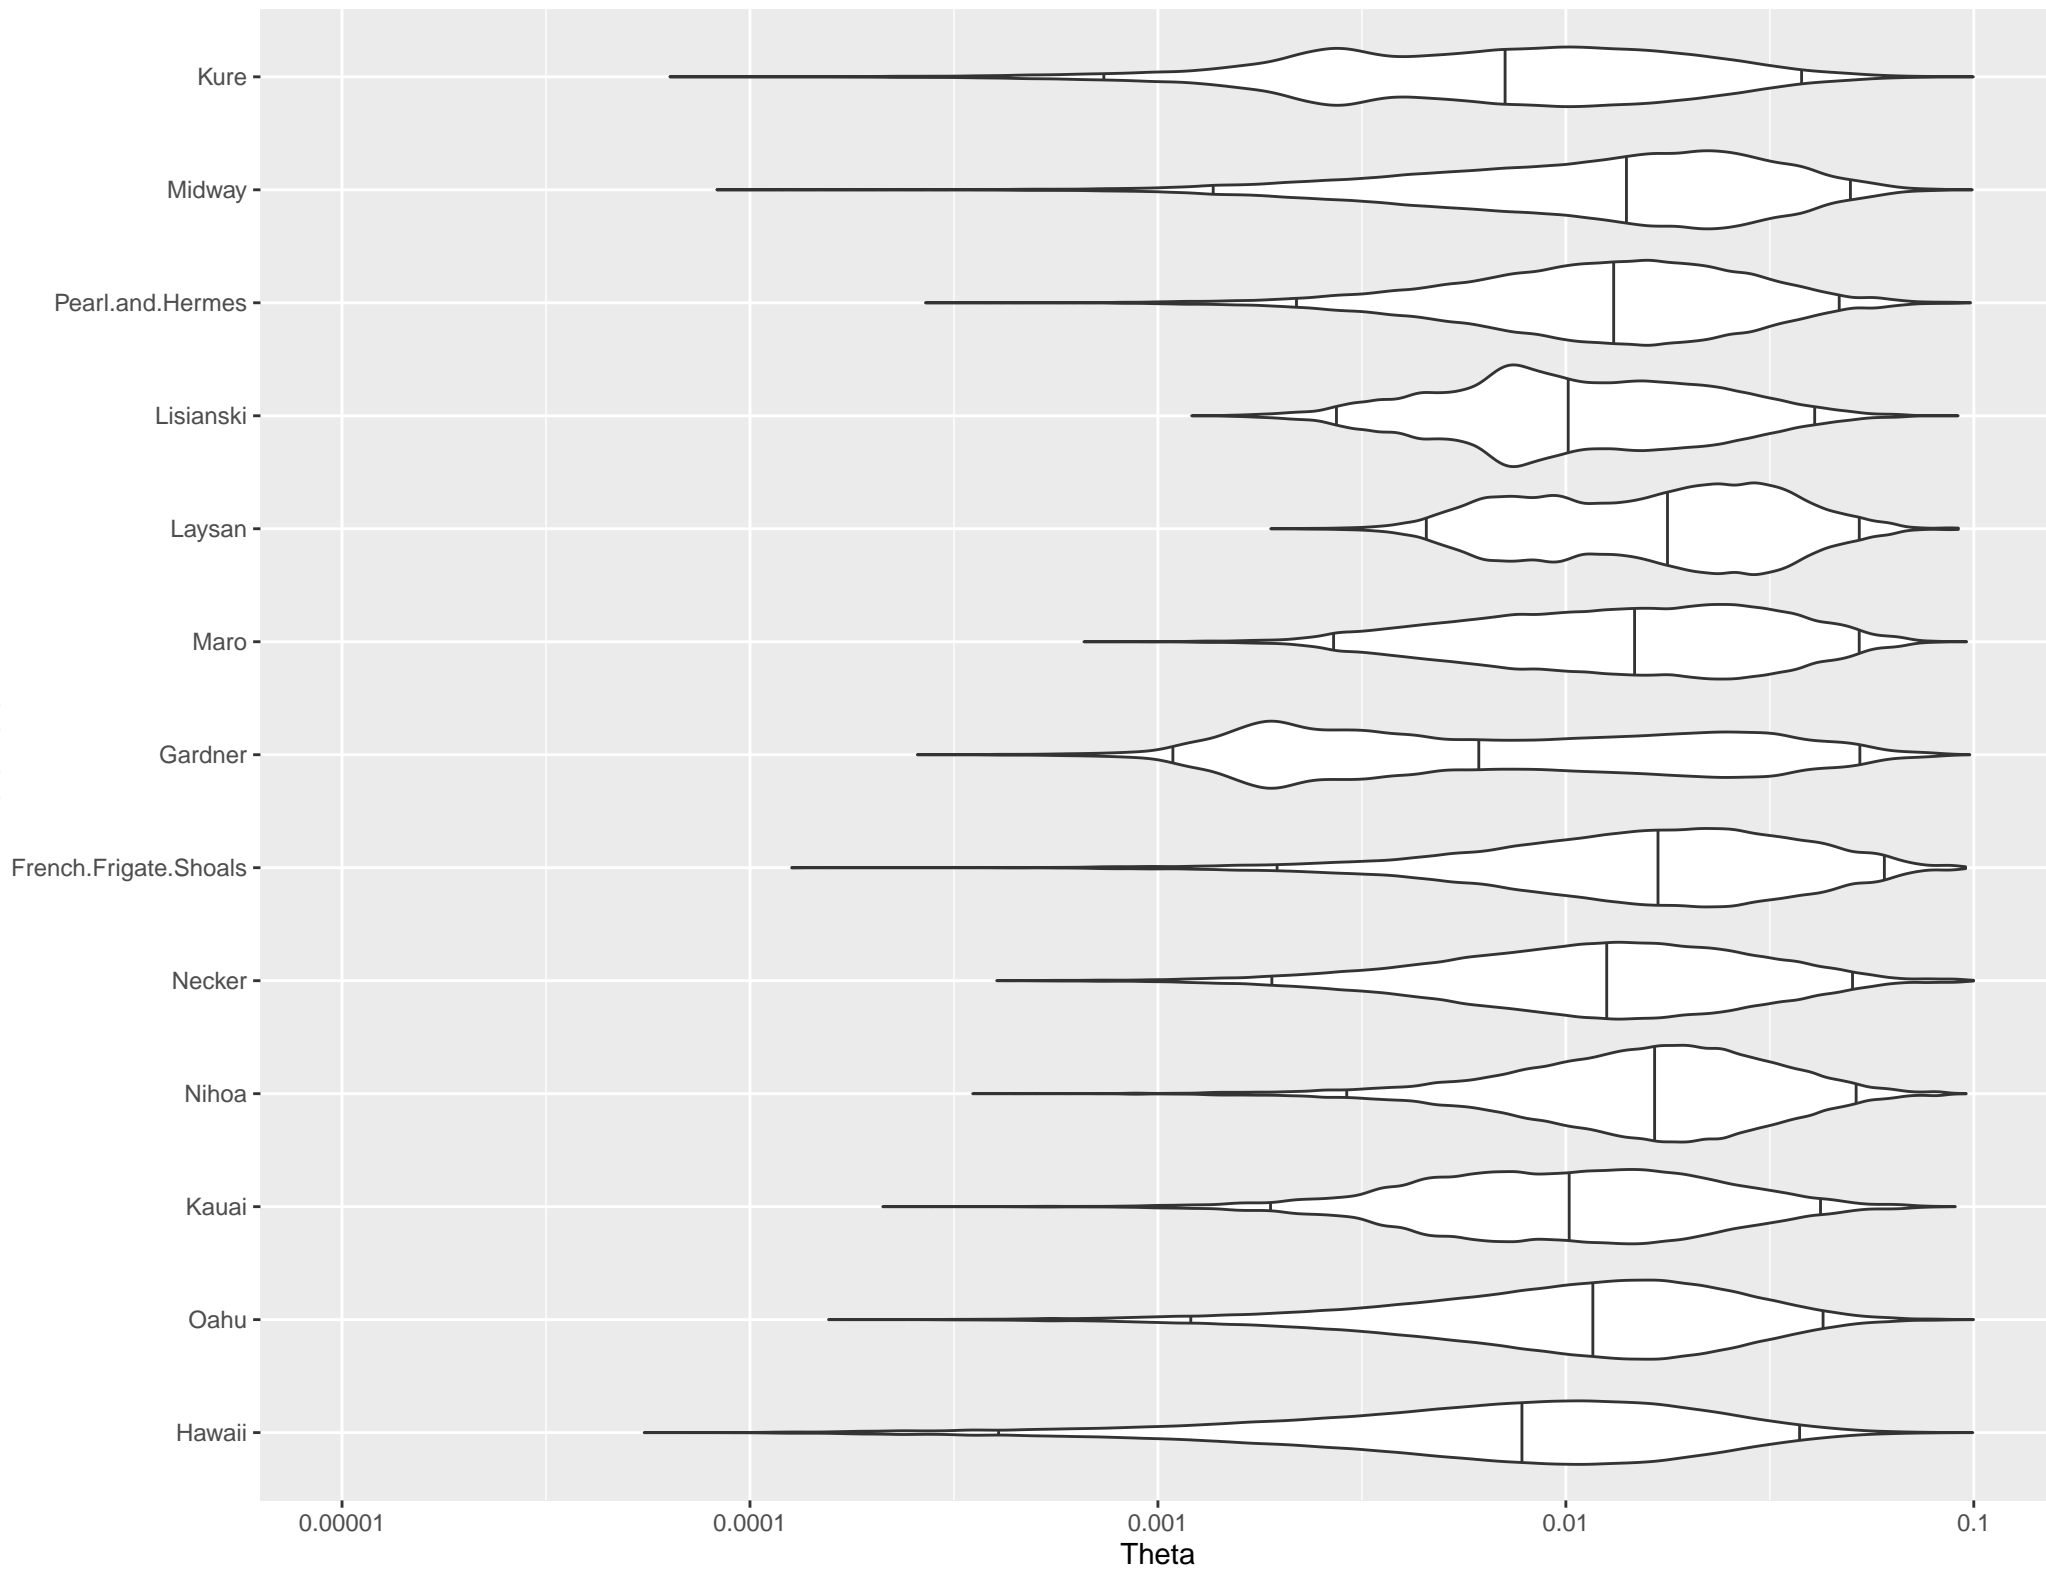

# Squalus mitsukurii

Parameter

Oahu to Maui

0.001

0.01

0.1

1

10

100

1,000

10,000

100,000

Effective Female Migrants per Generation

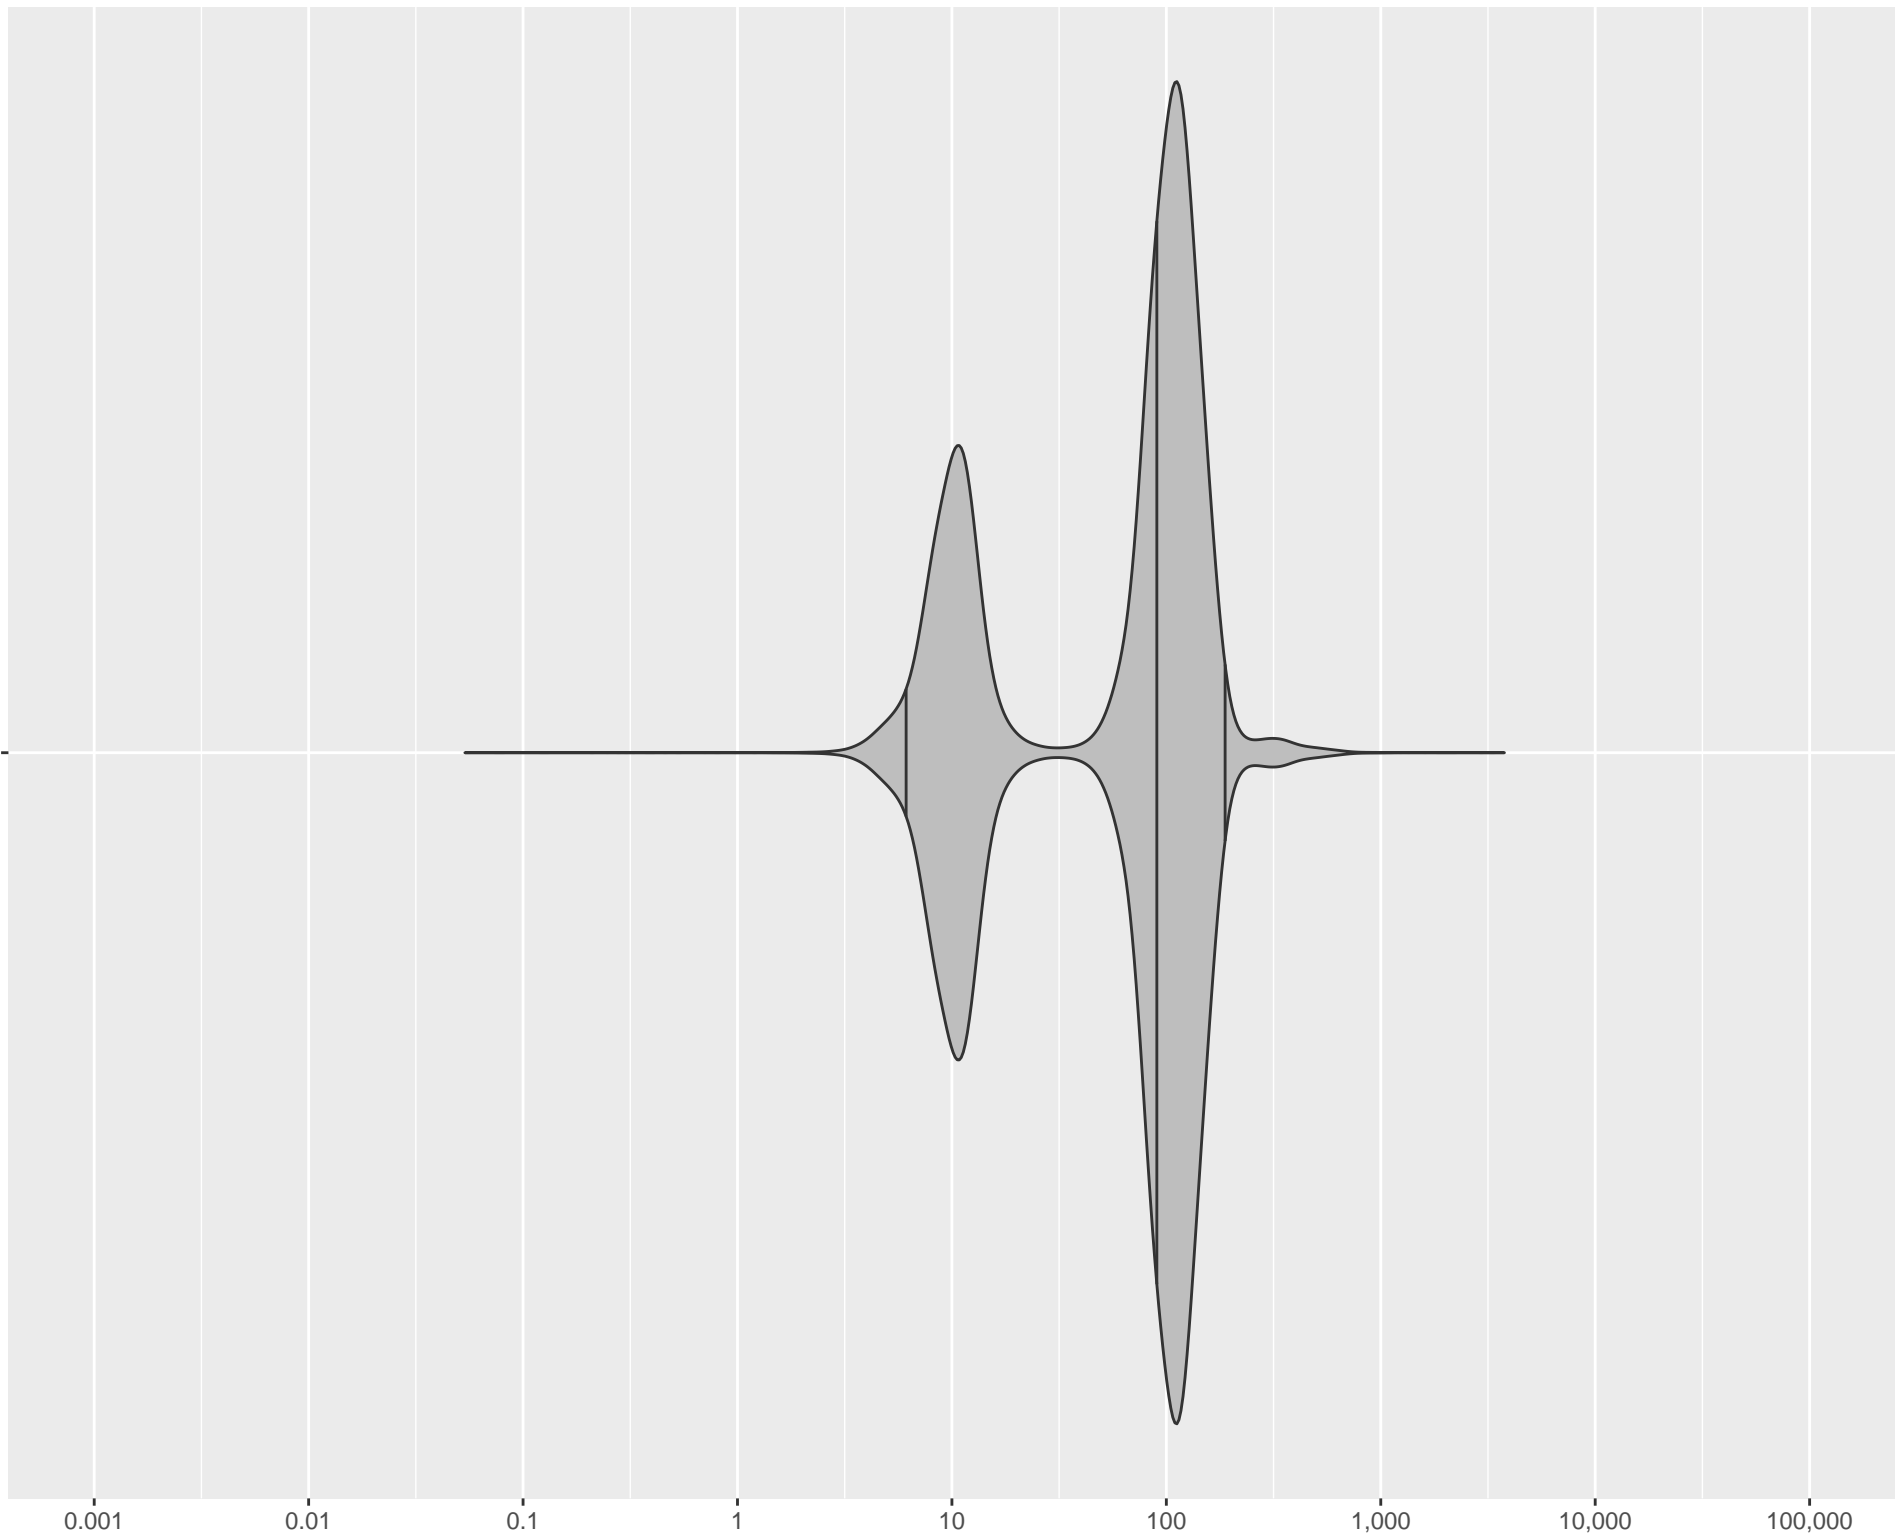

Squalus mitsukurii

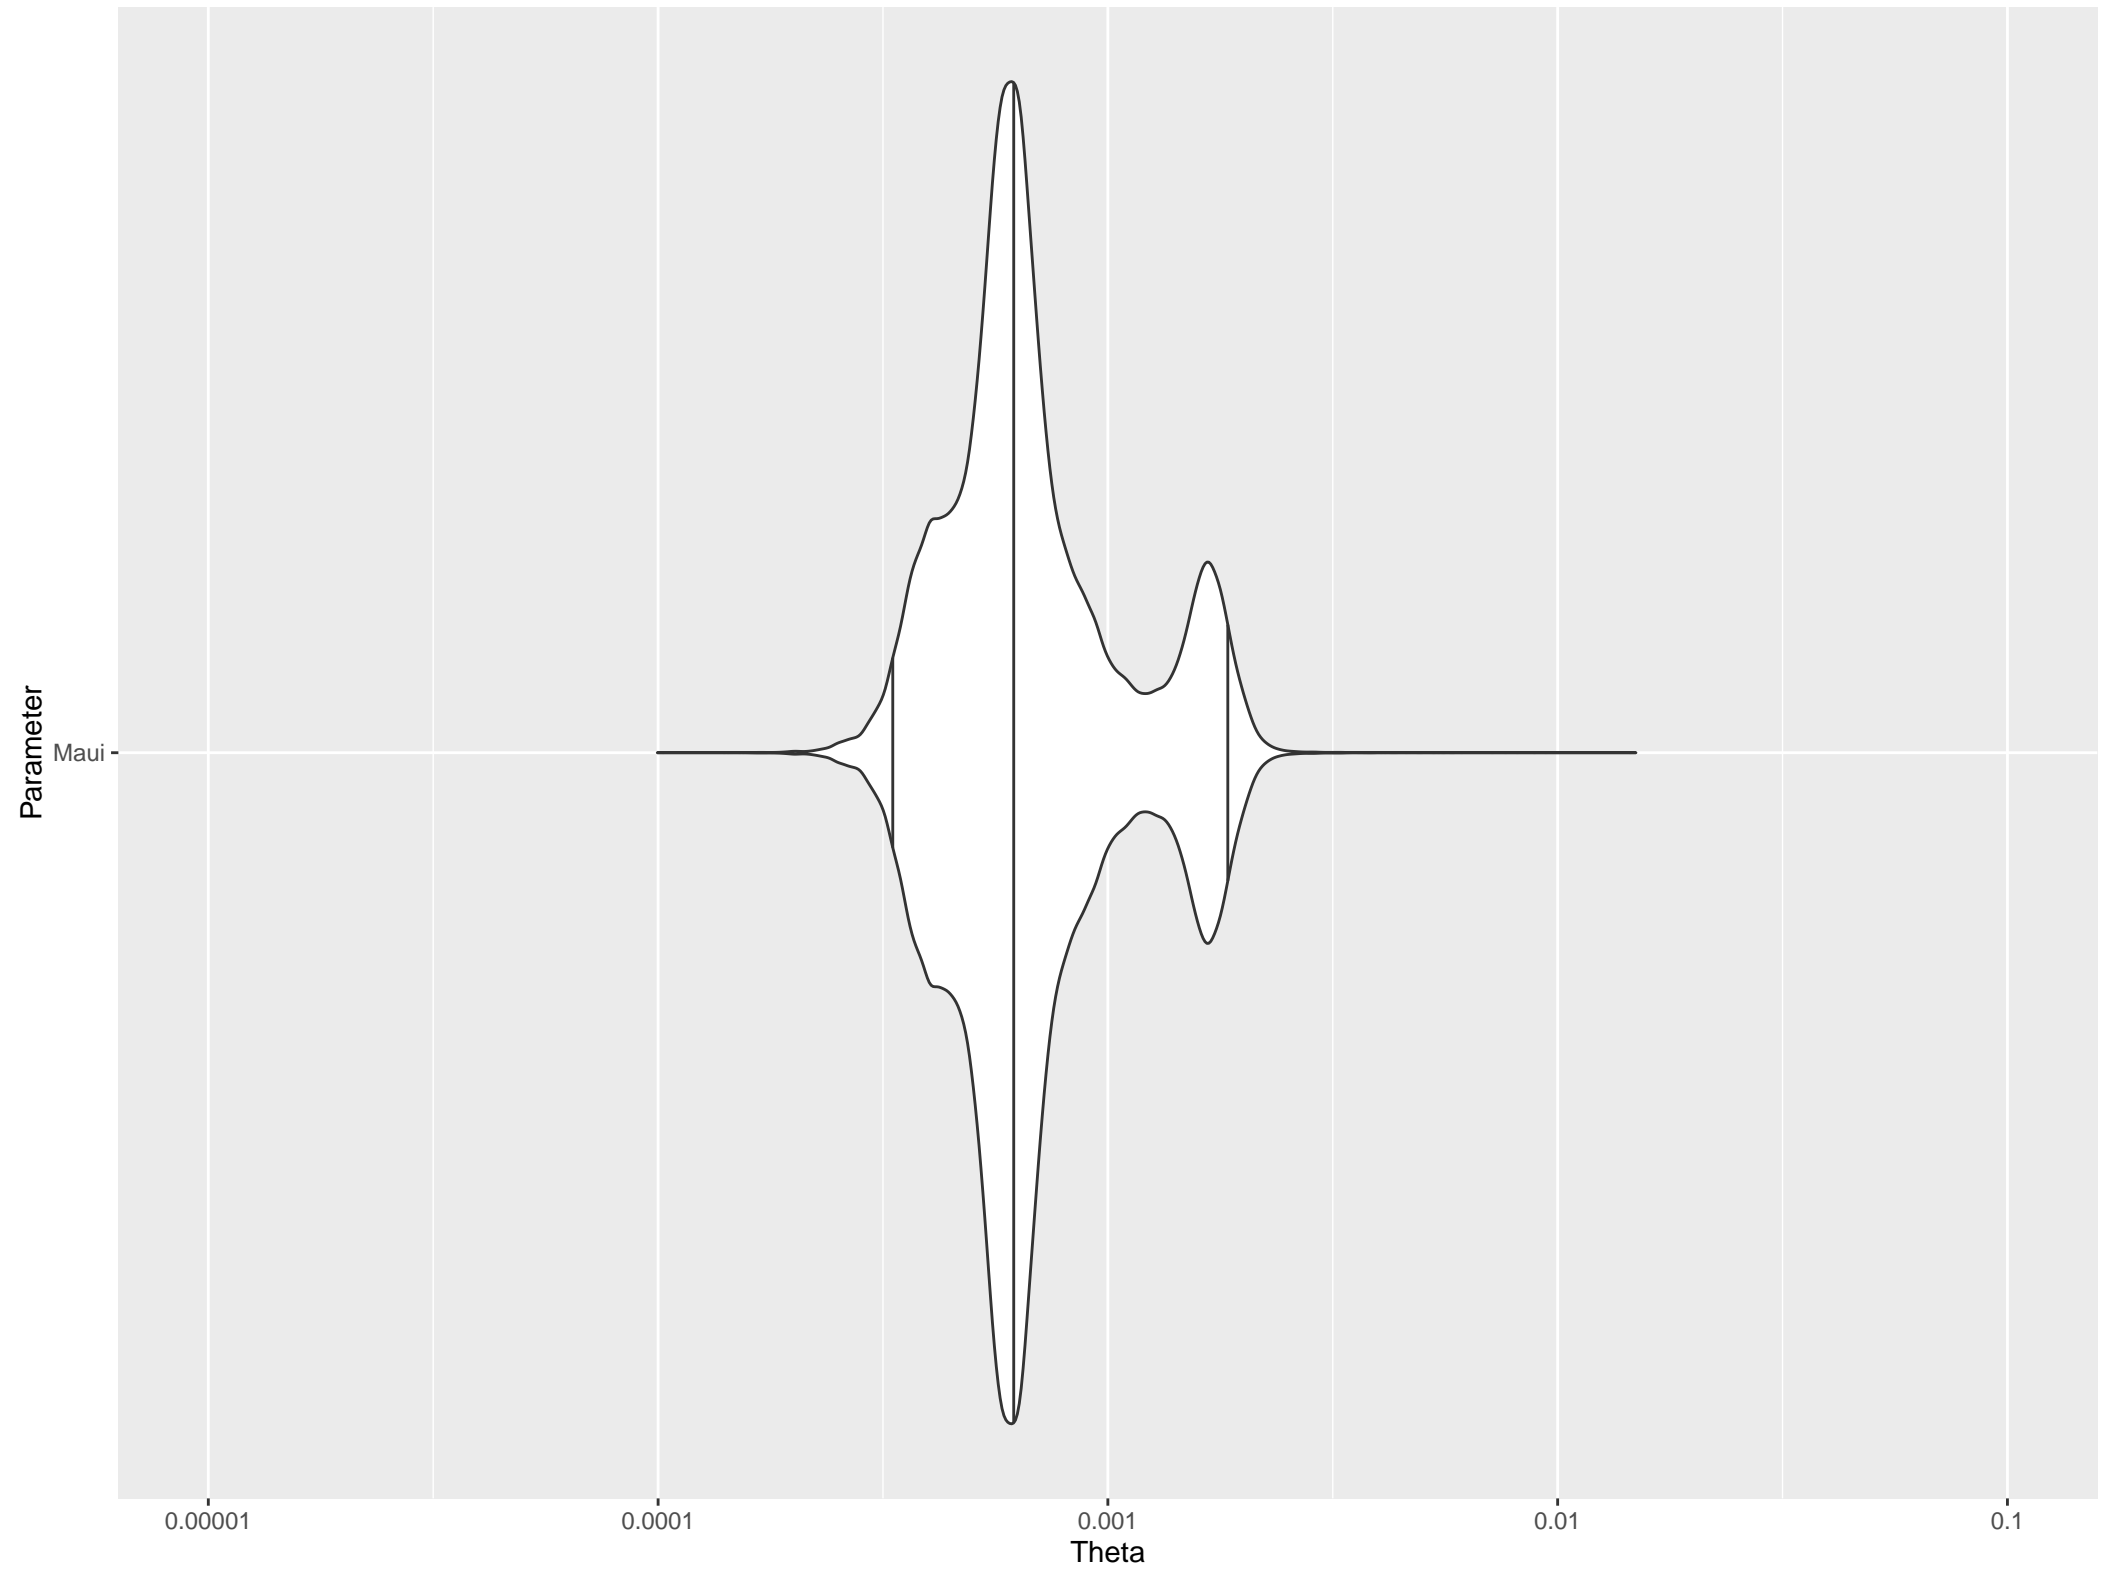

# Stegastes fasciolatus

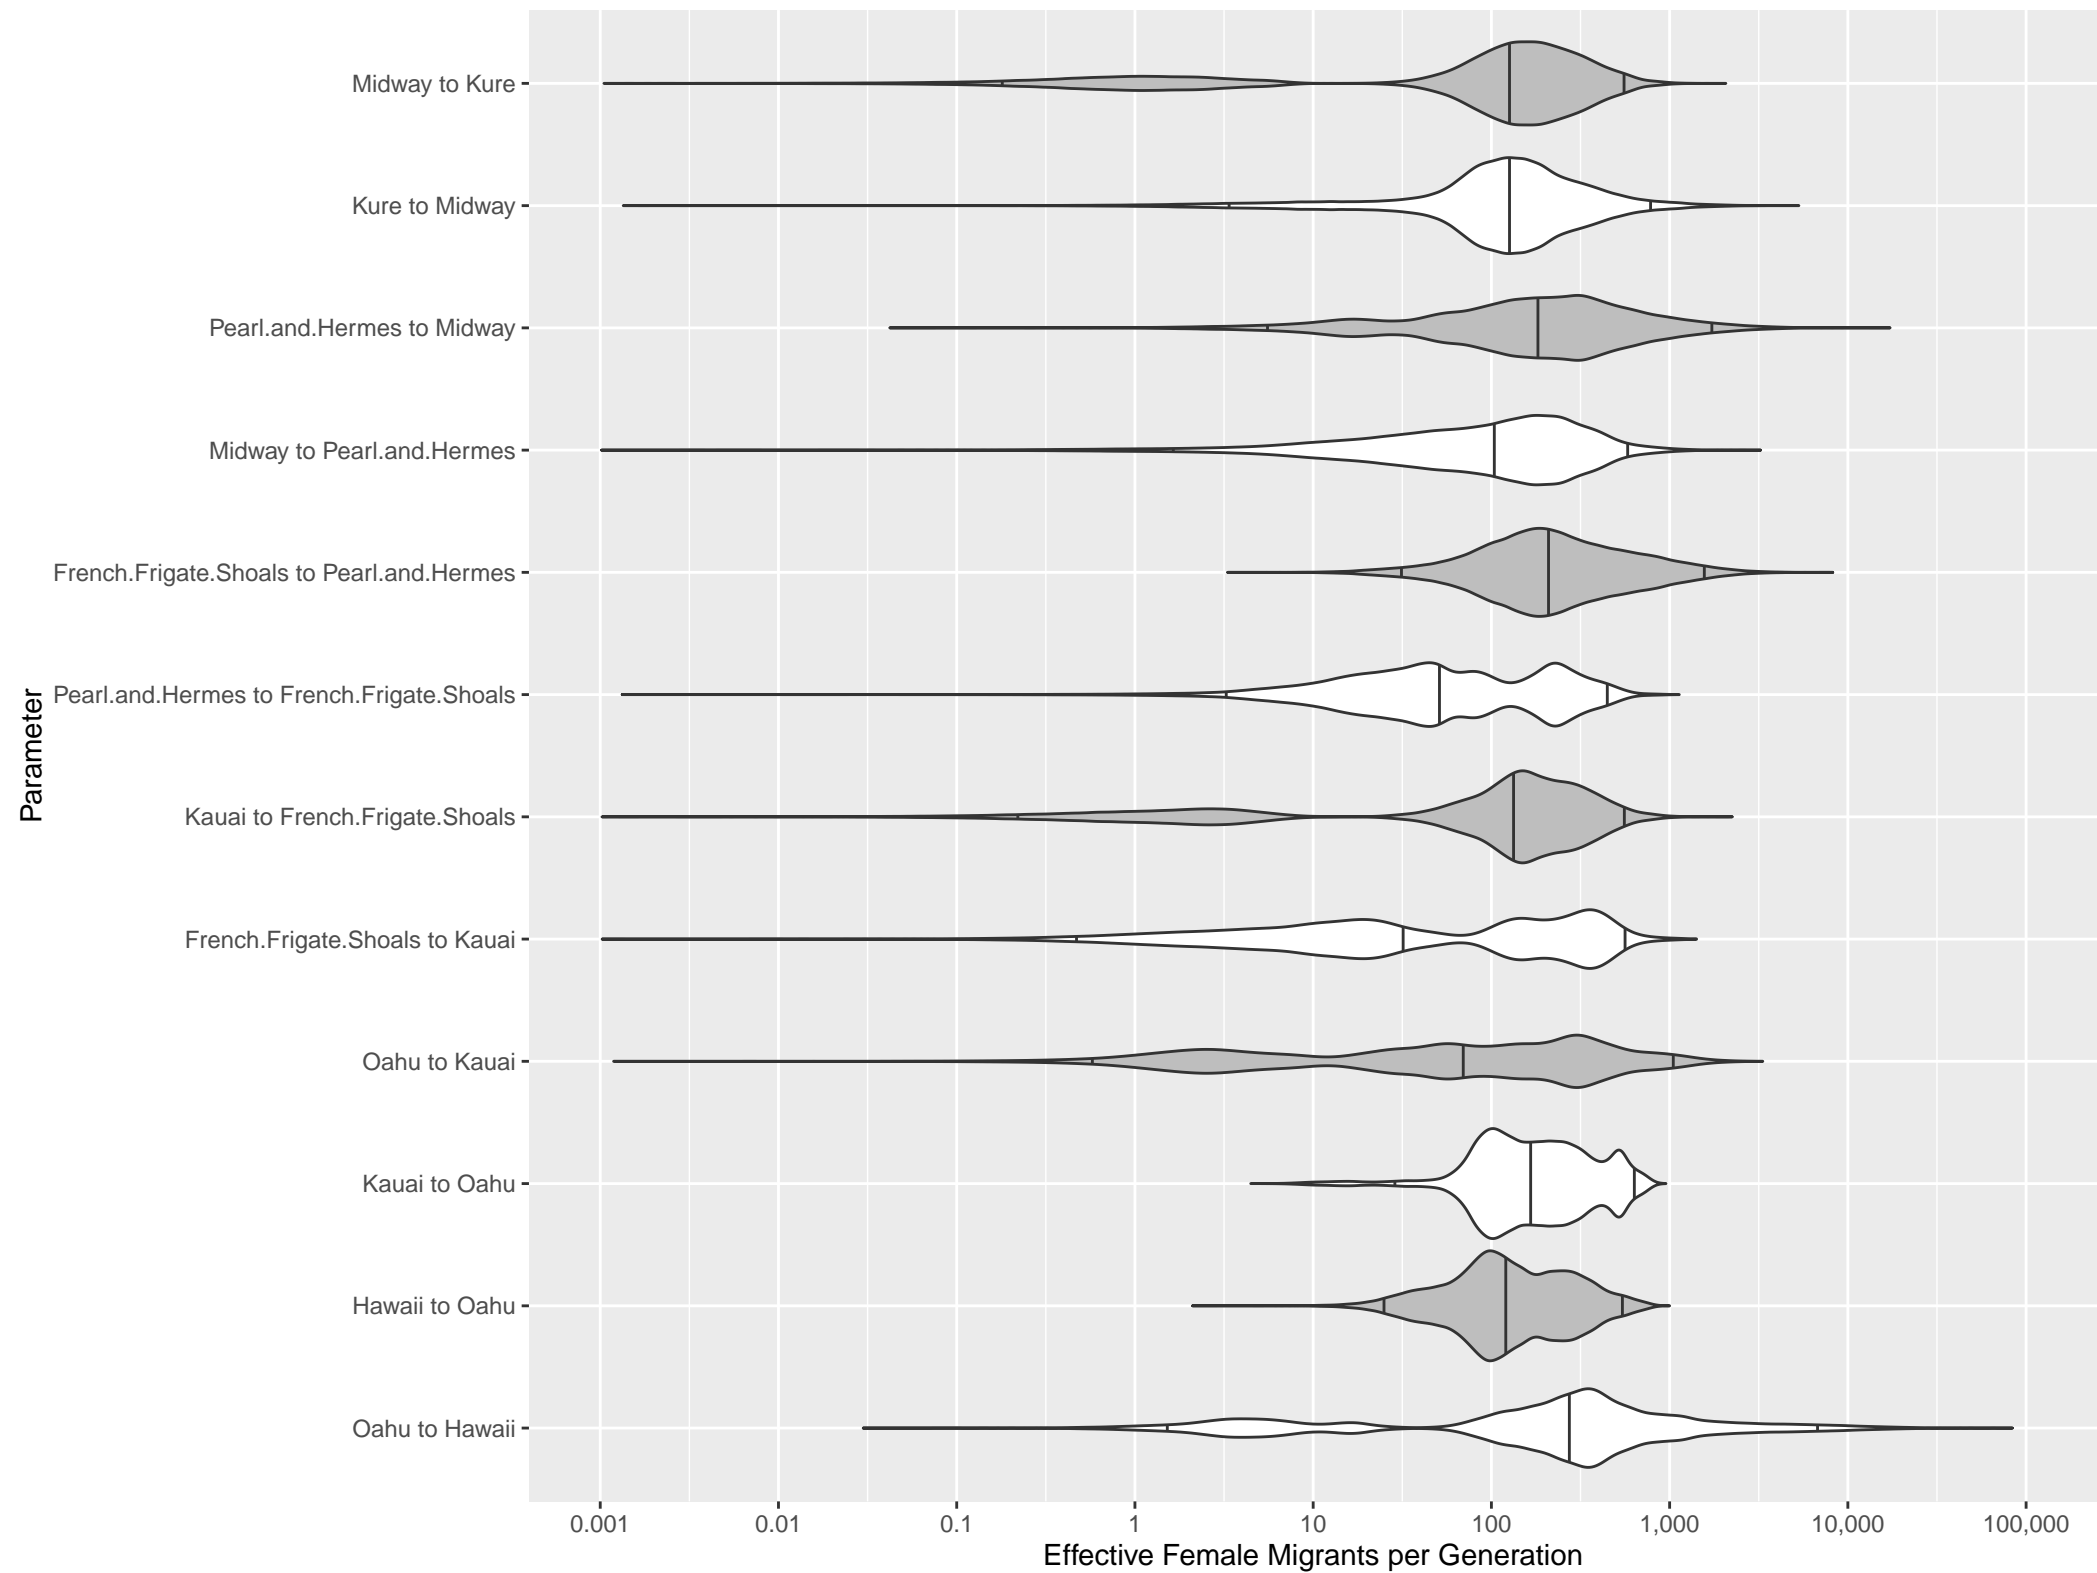



# Stegastes fasciolatus

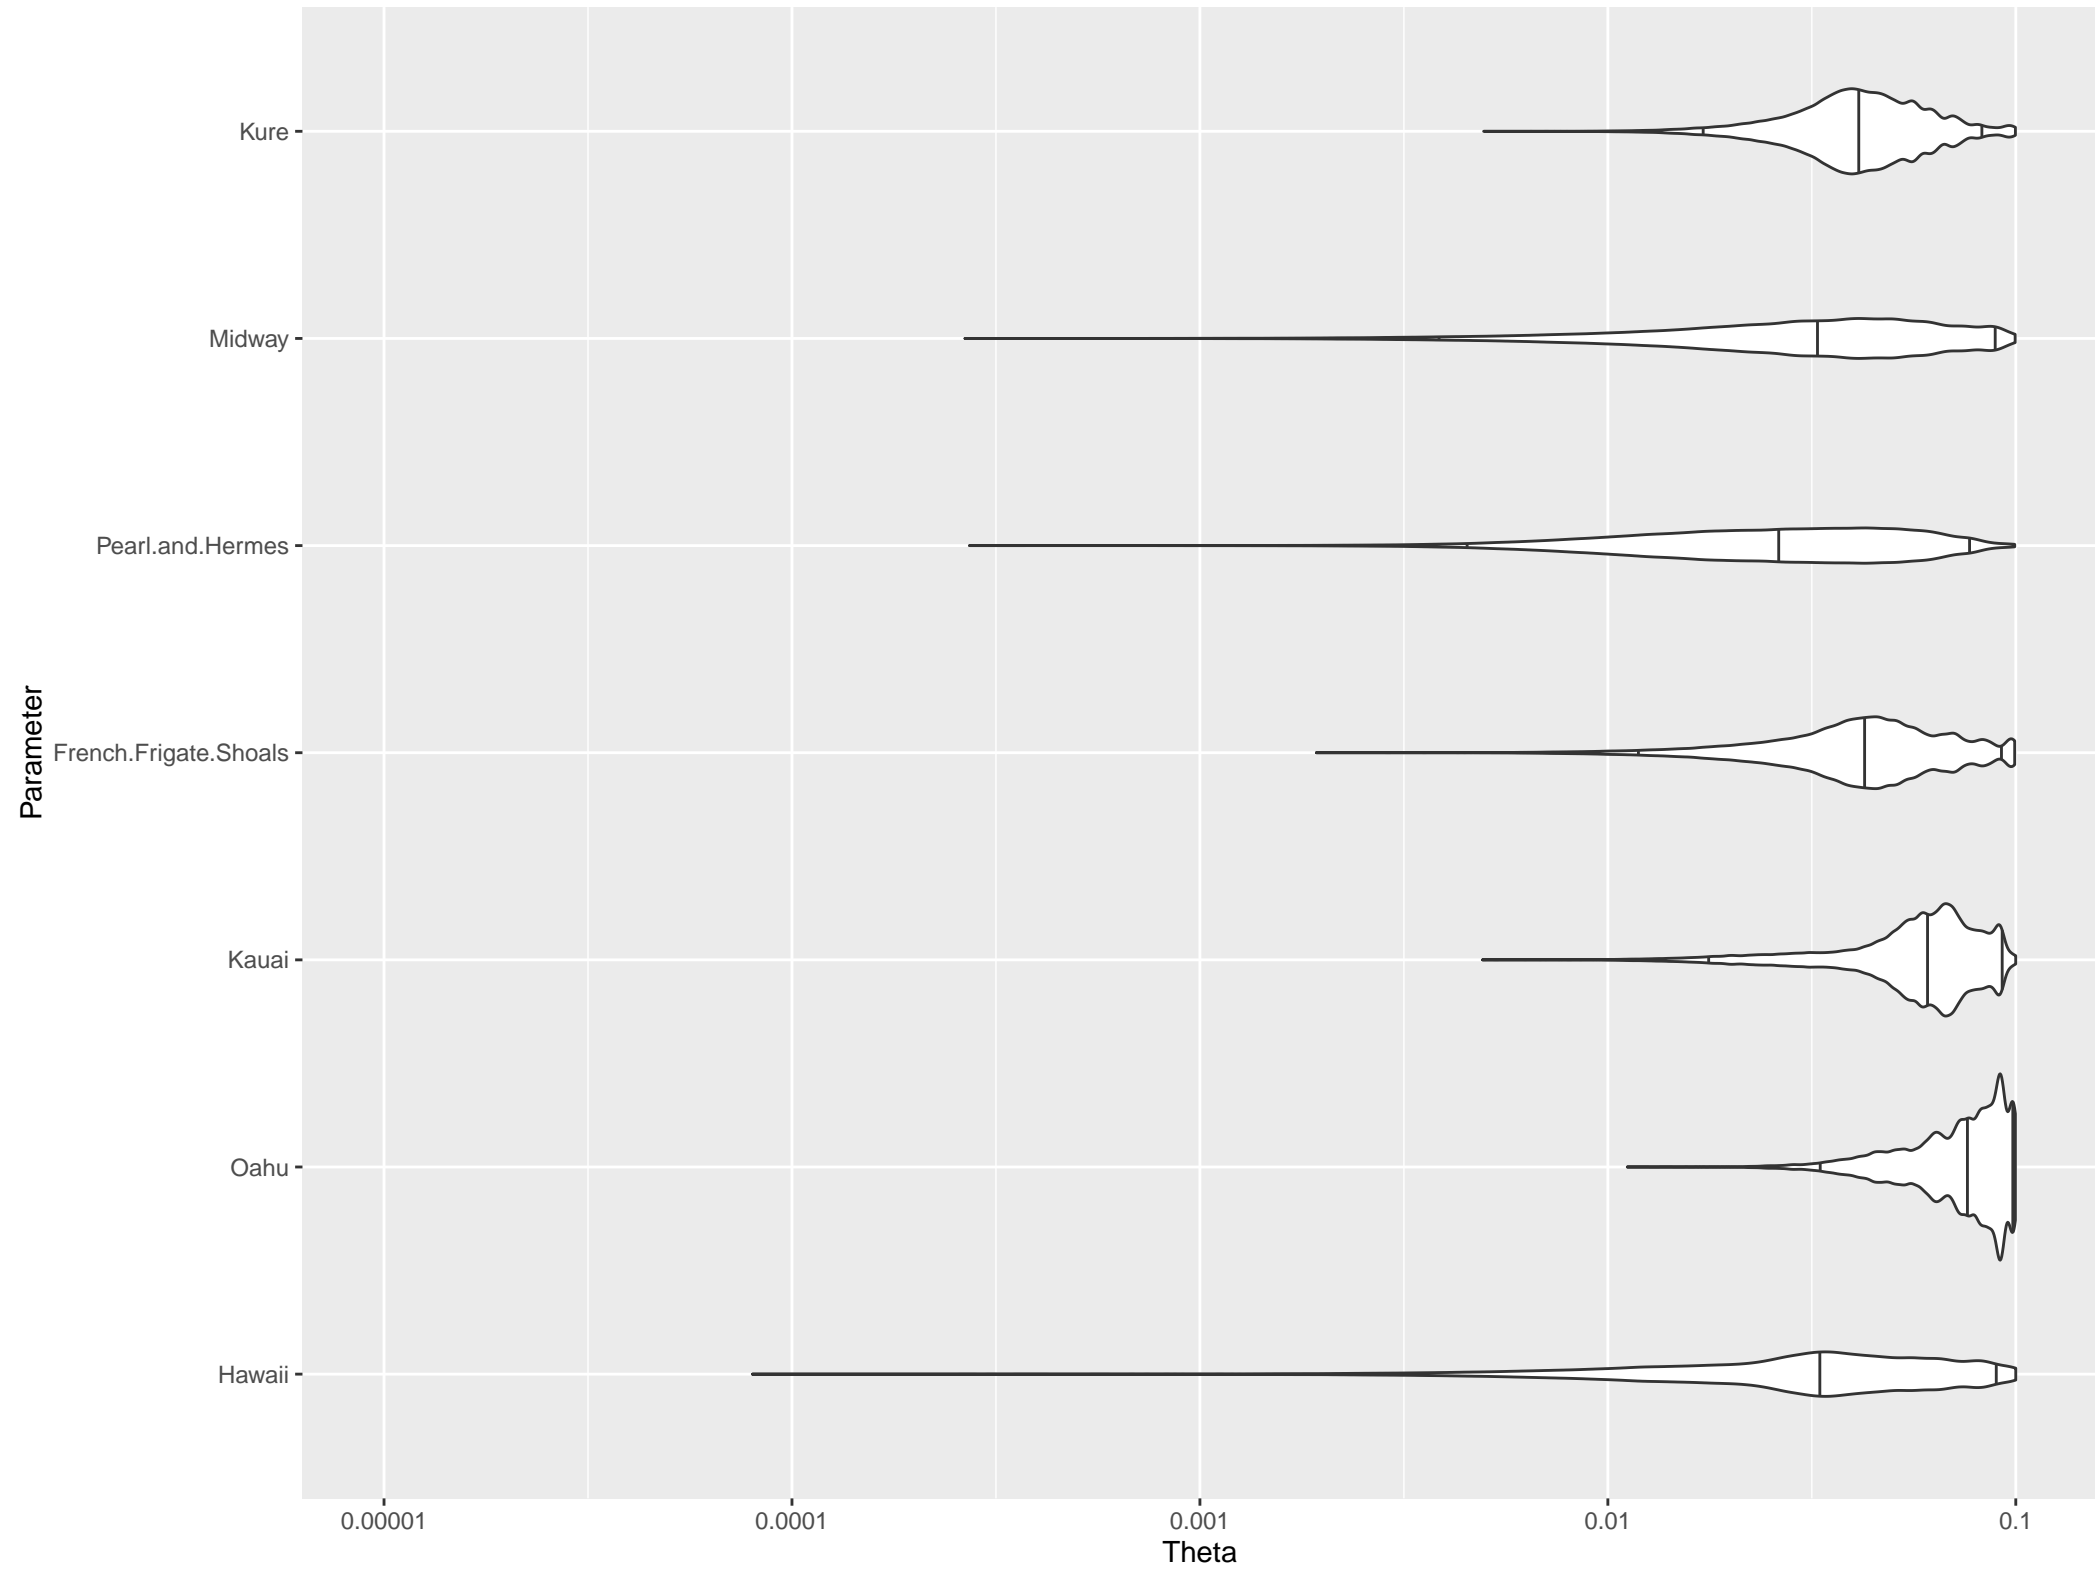

# Stenella longirostris

Maui to Oahu

Oahu to Maui

Hawaii to Maui

Maui to Hawaii

0.001

0.01

0.1

1

10

100

1,000

10,000

100,000

Effective Female Migrants per Generation

Parameter

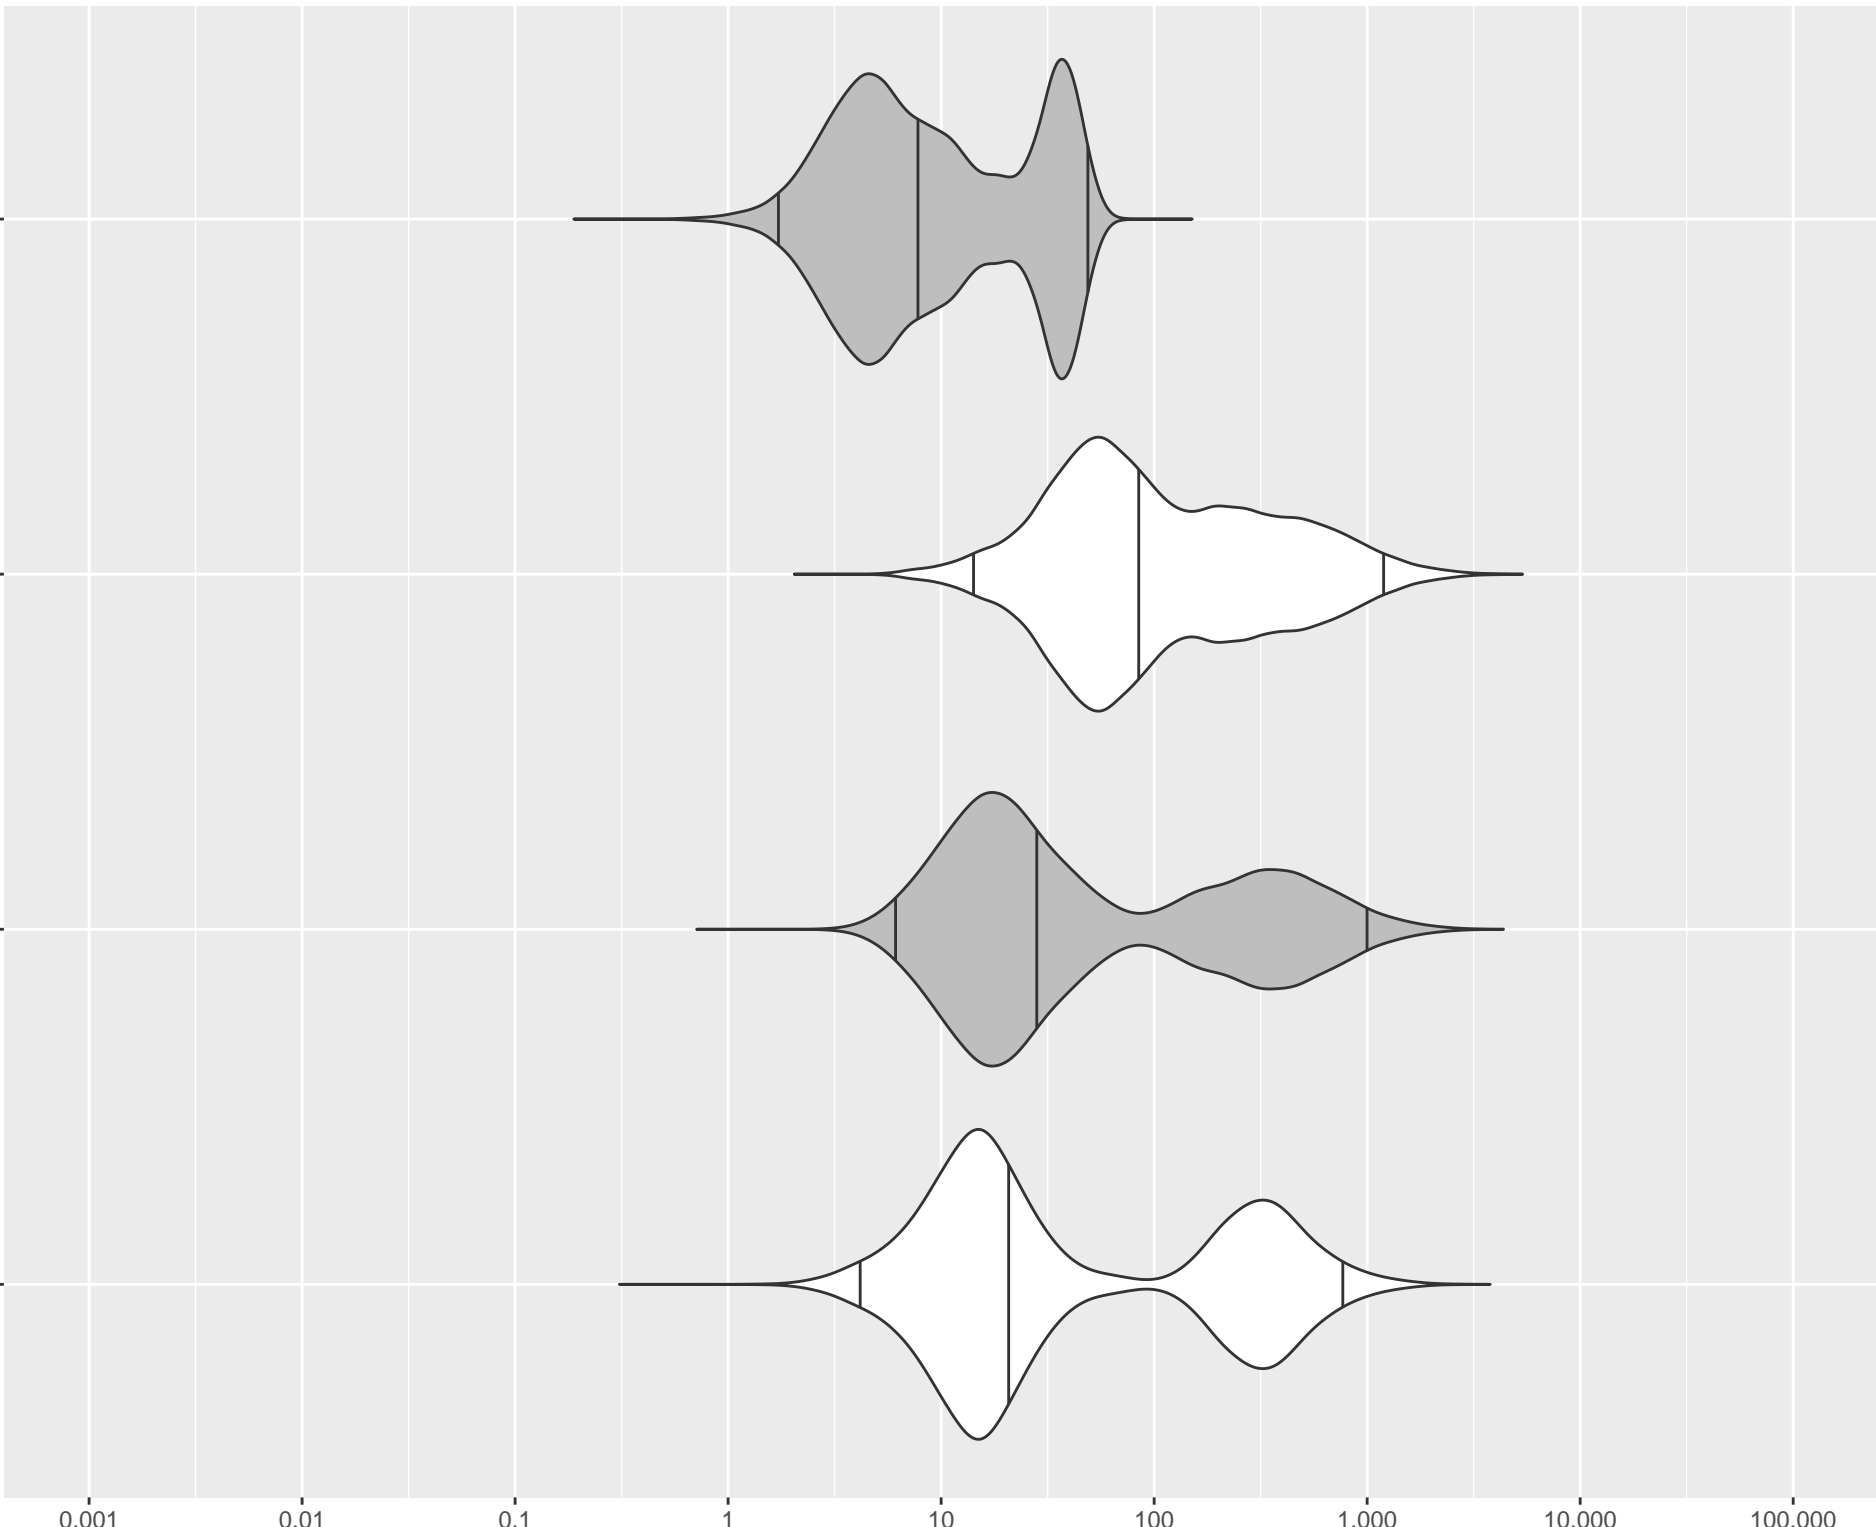

*Stenella longirostris*

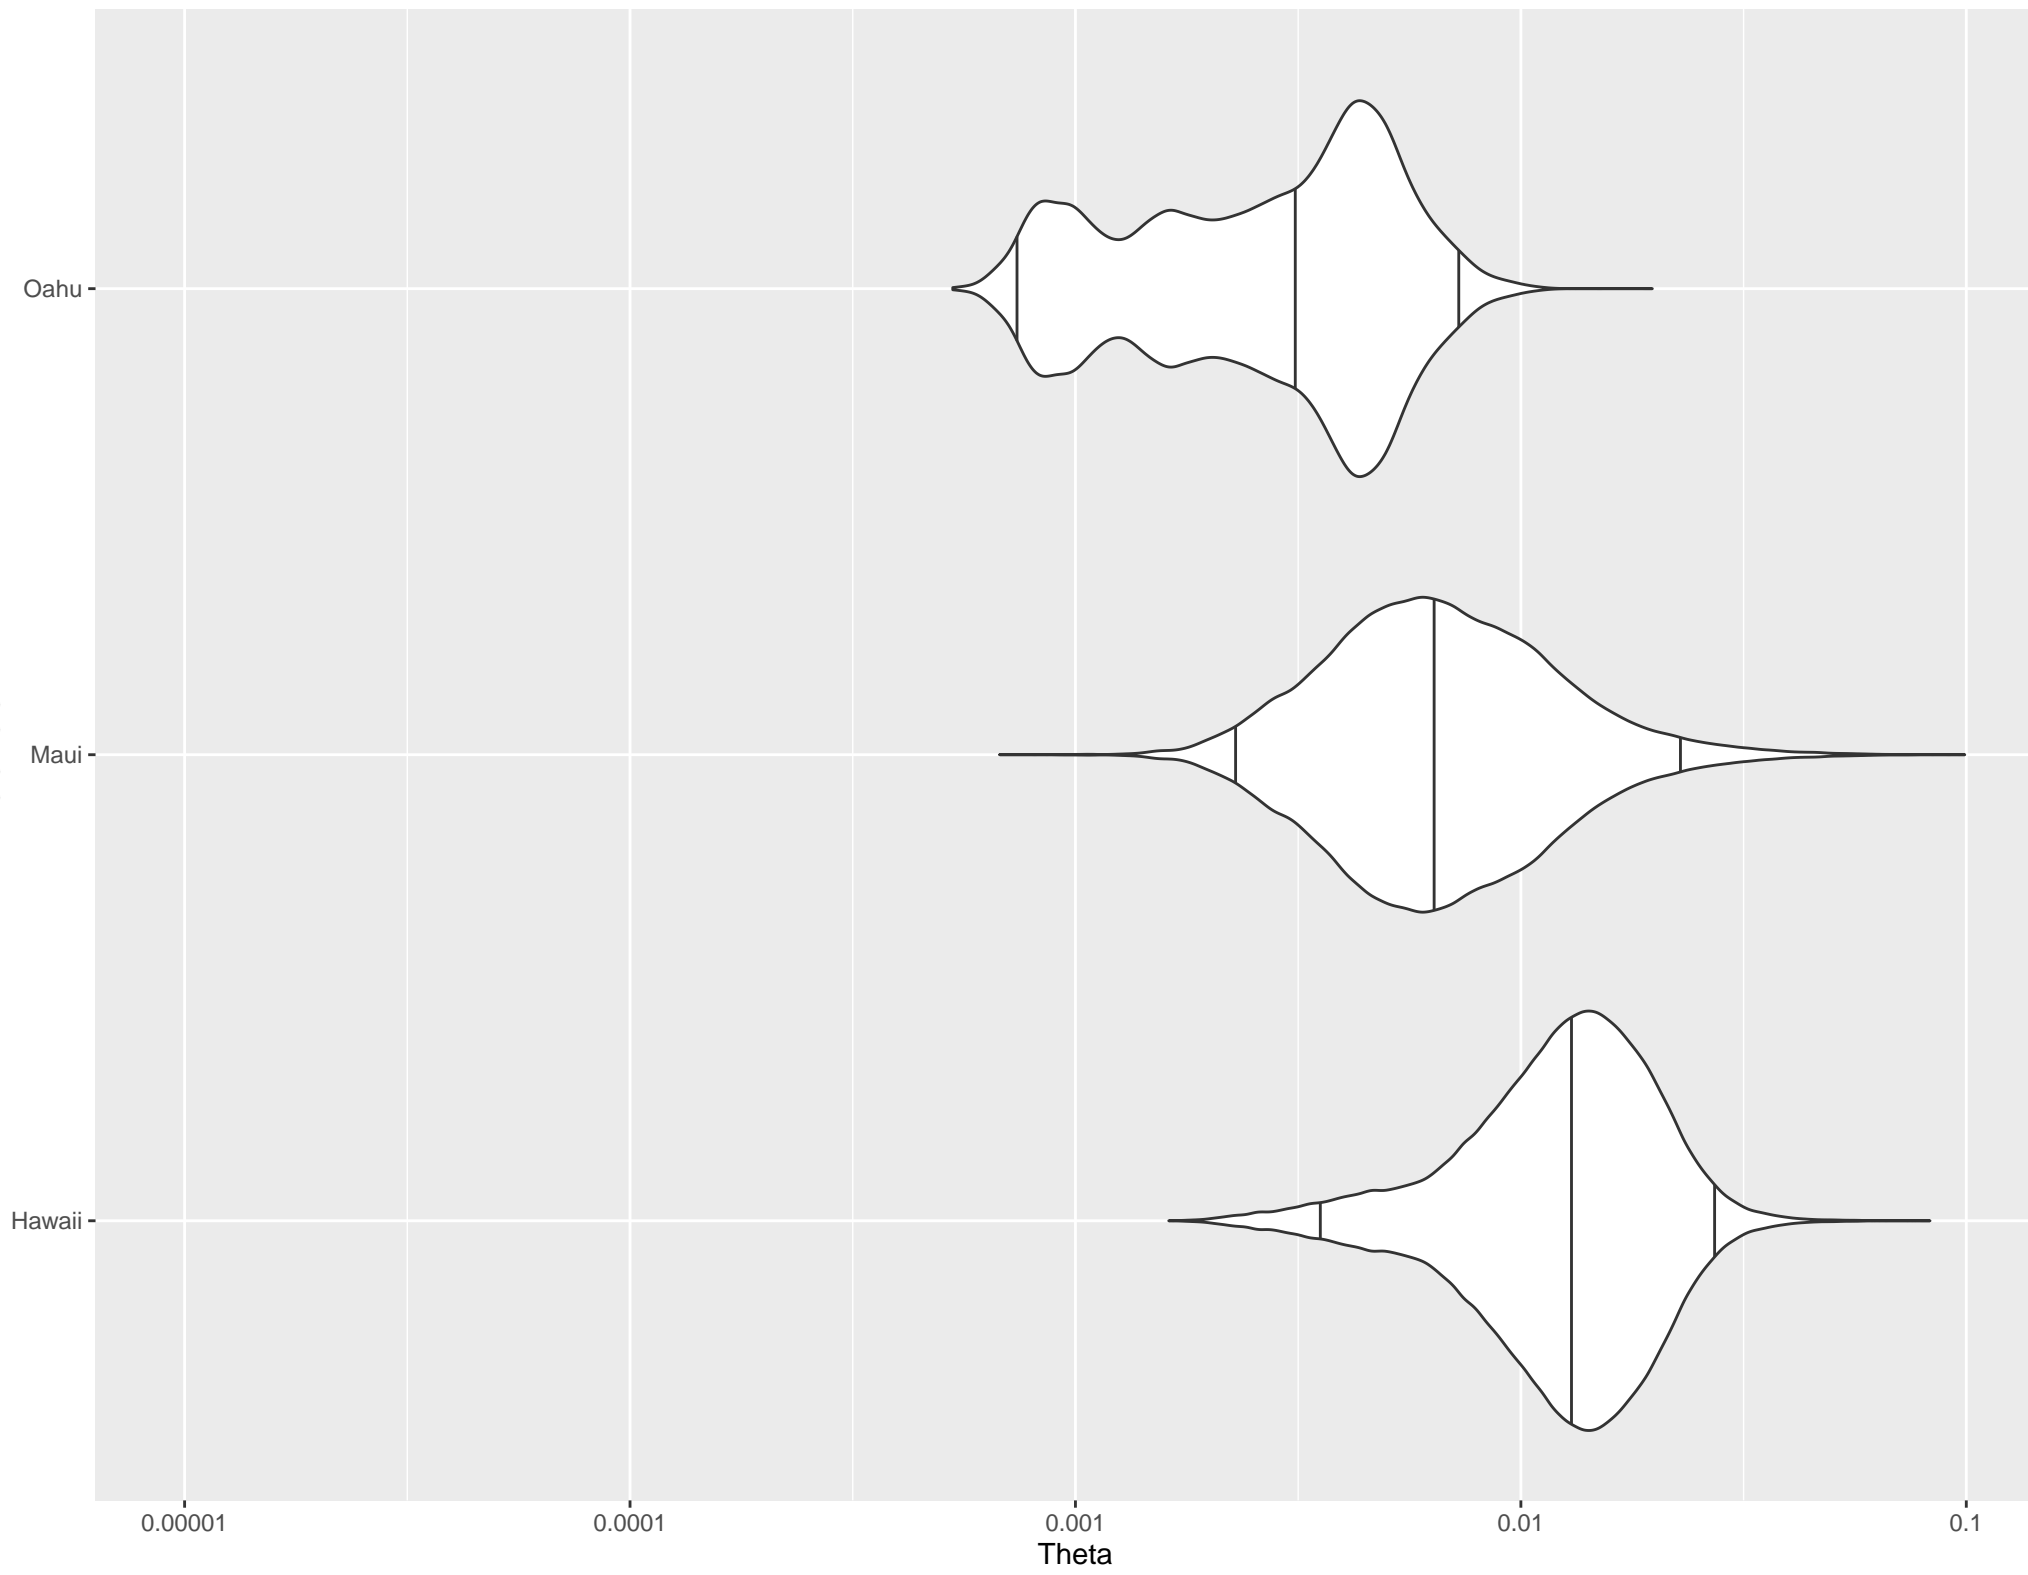

# Trienodon obesus

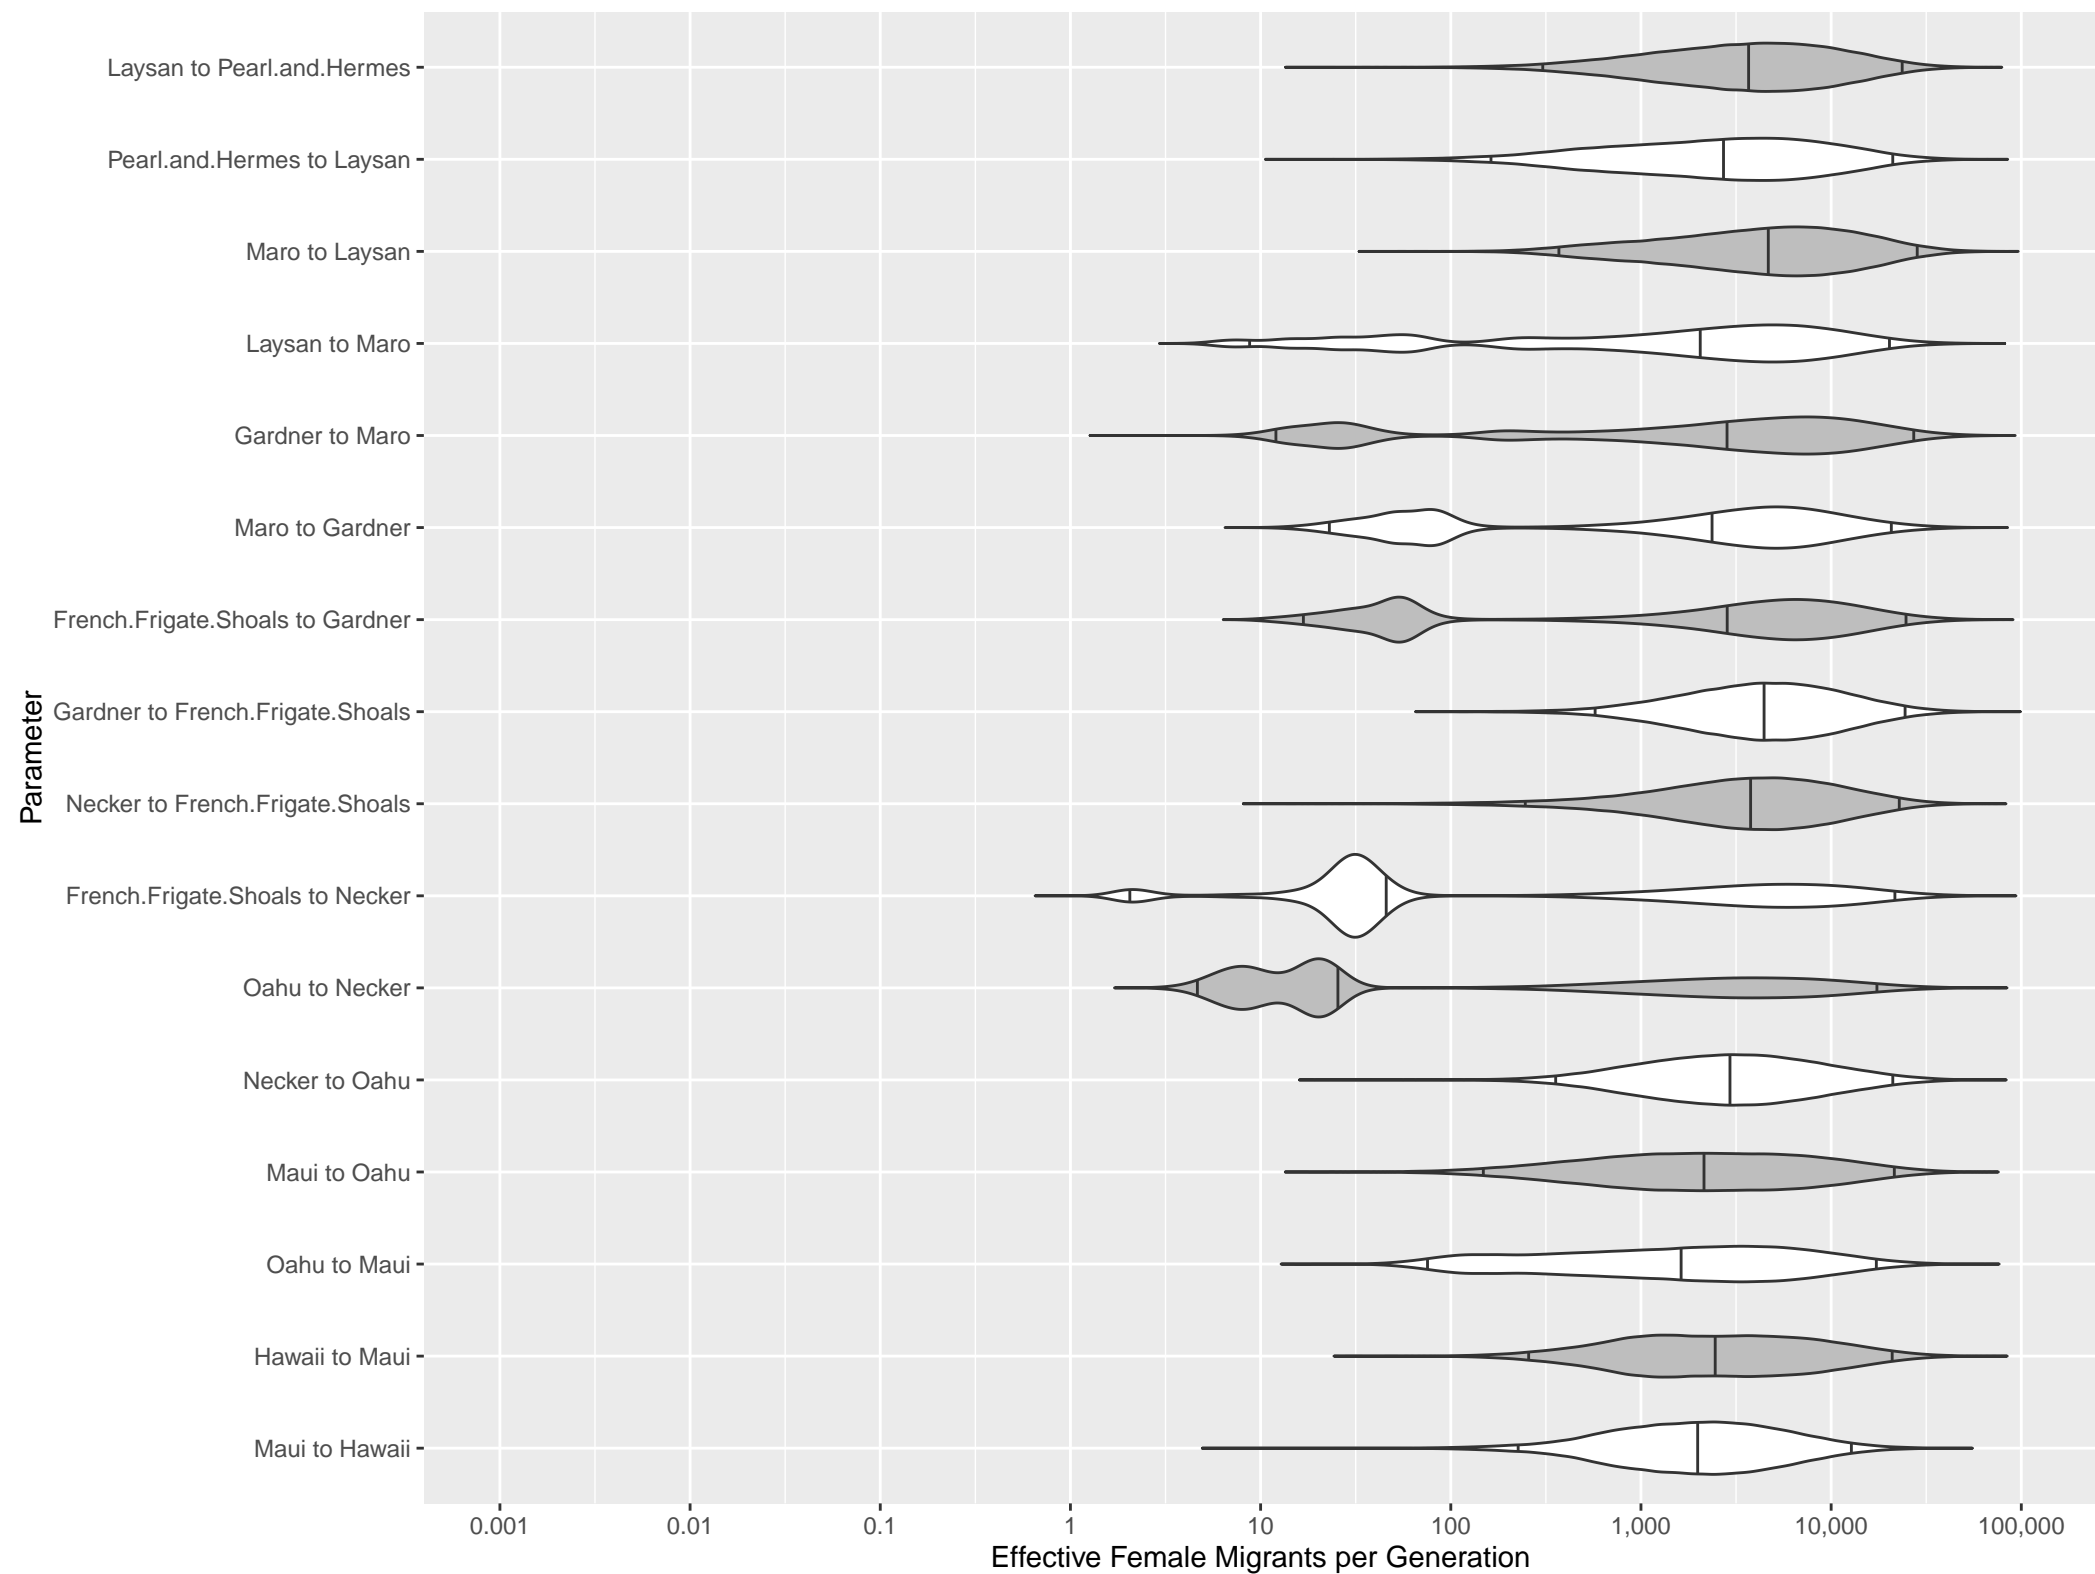

# Trienodon obesus

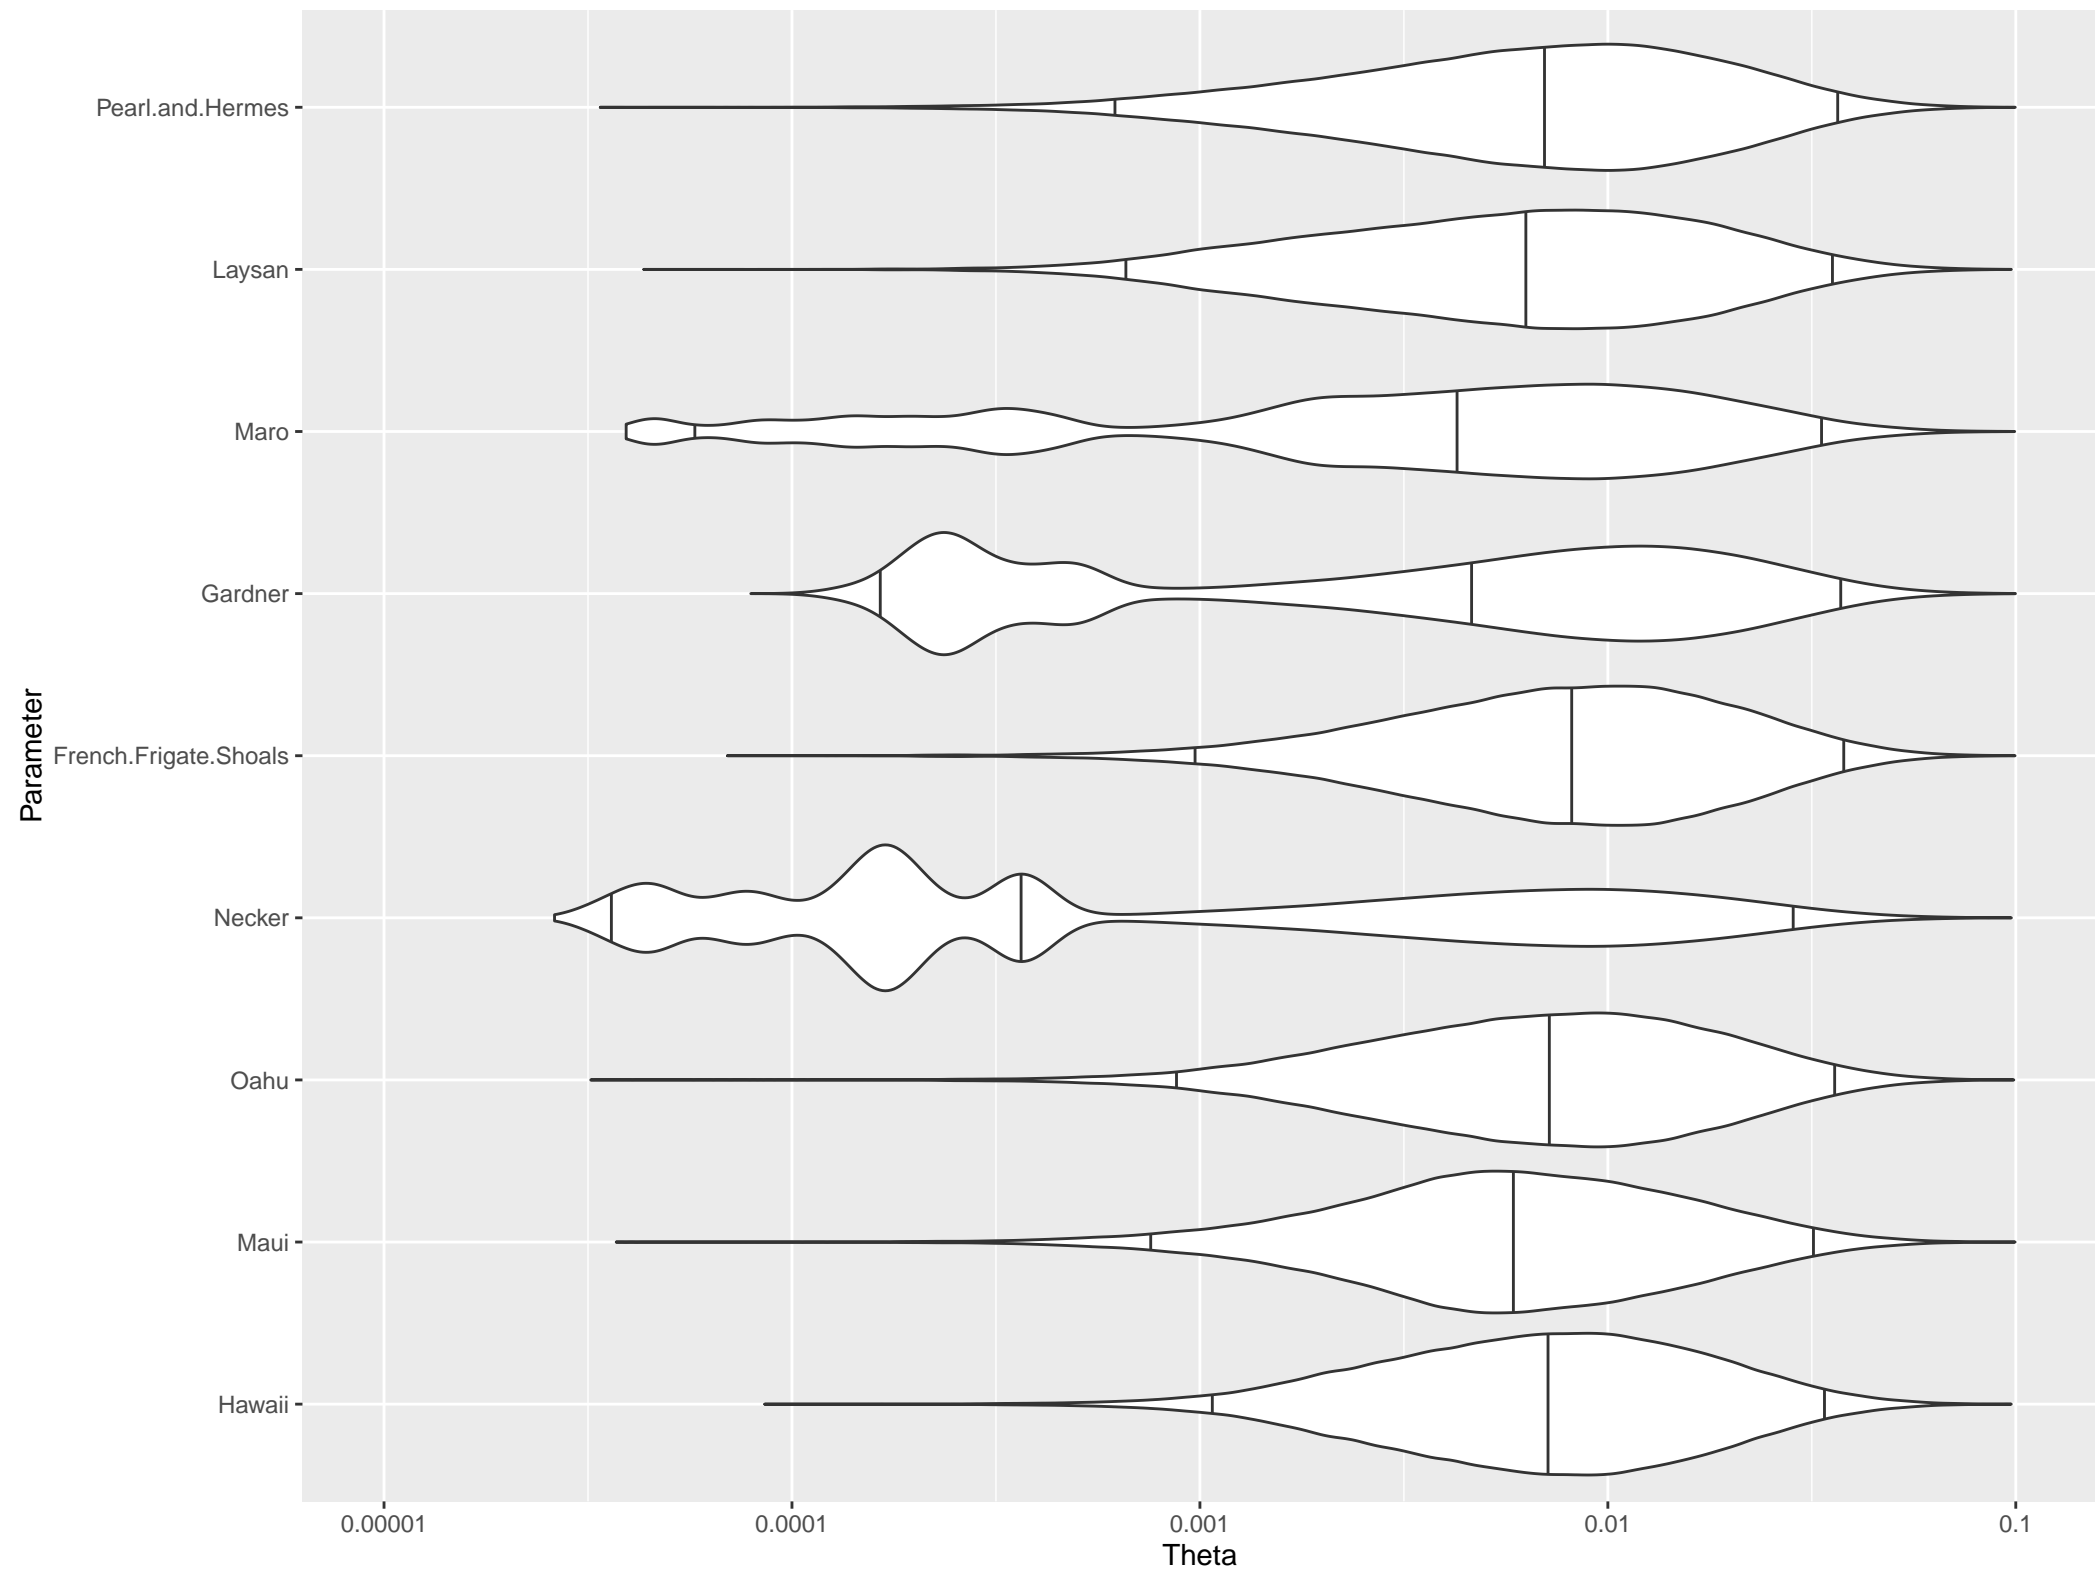

# Zebrasoma flavescens

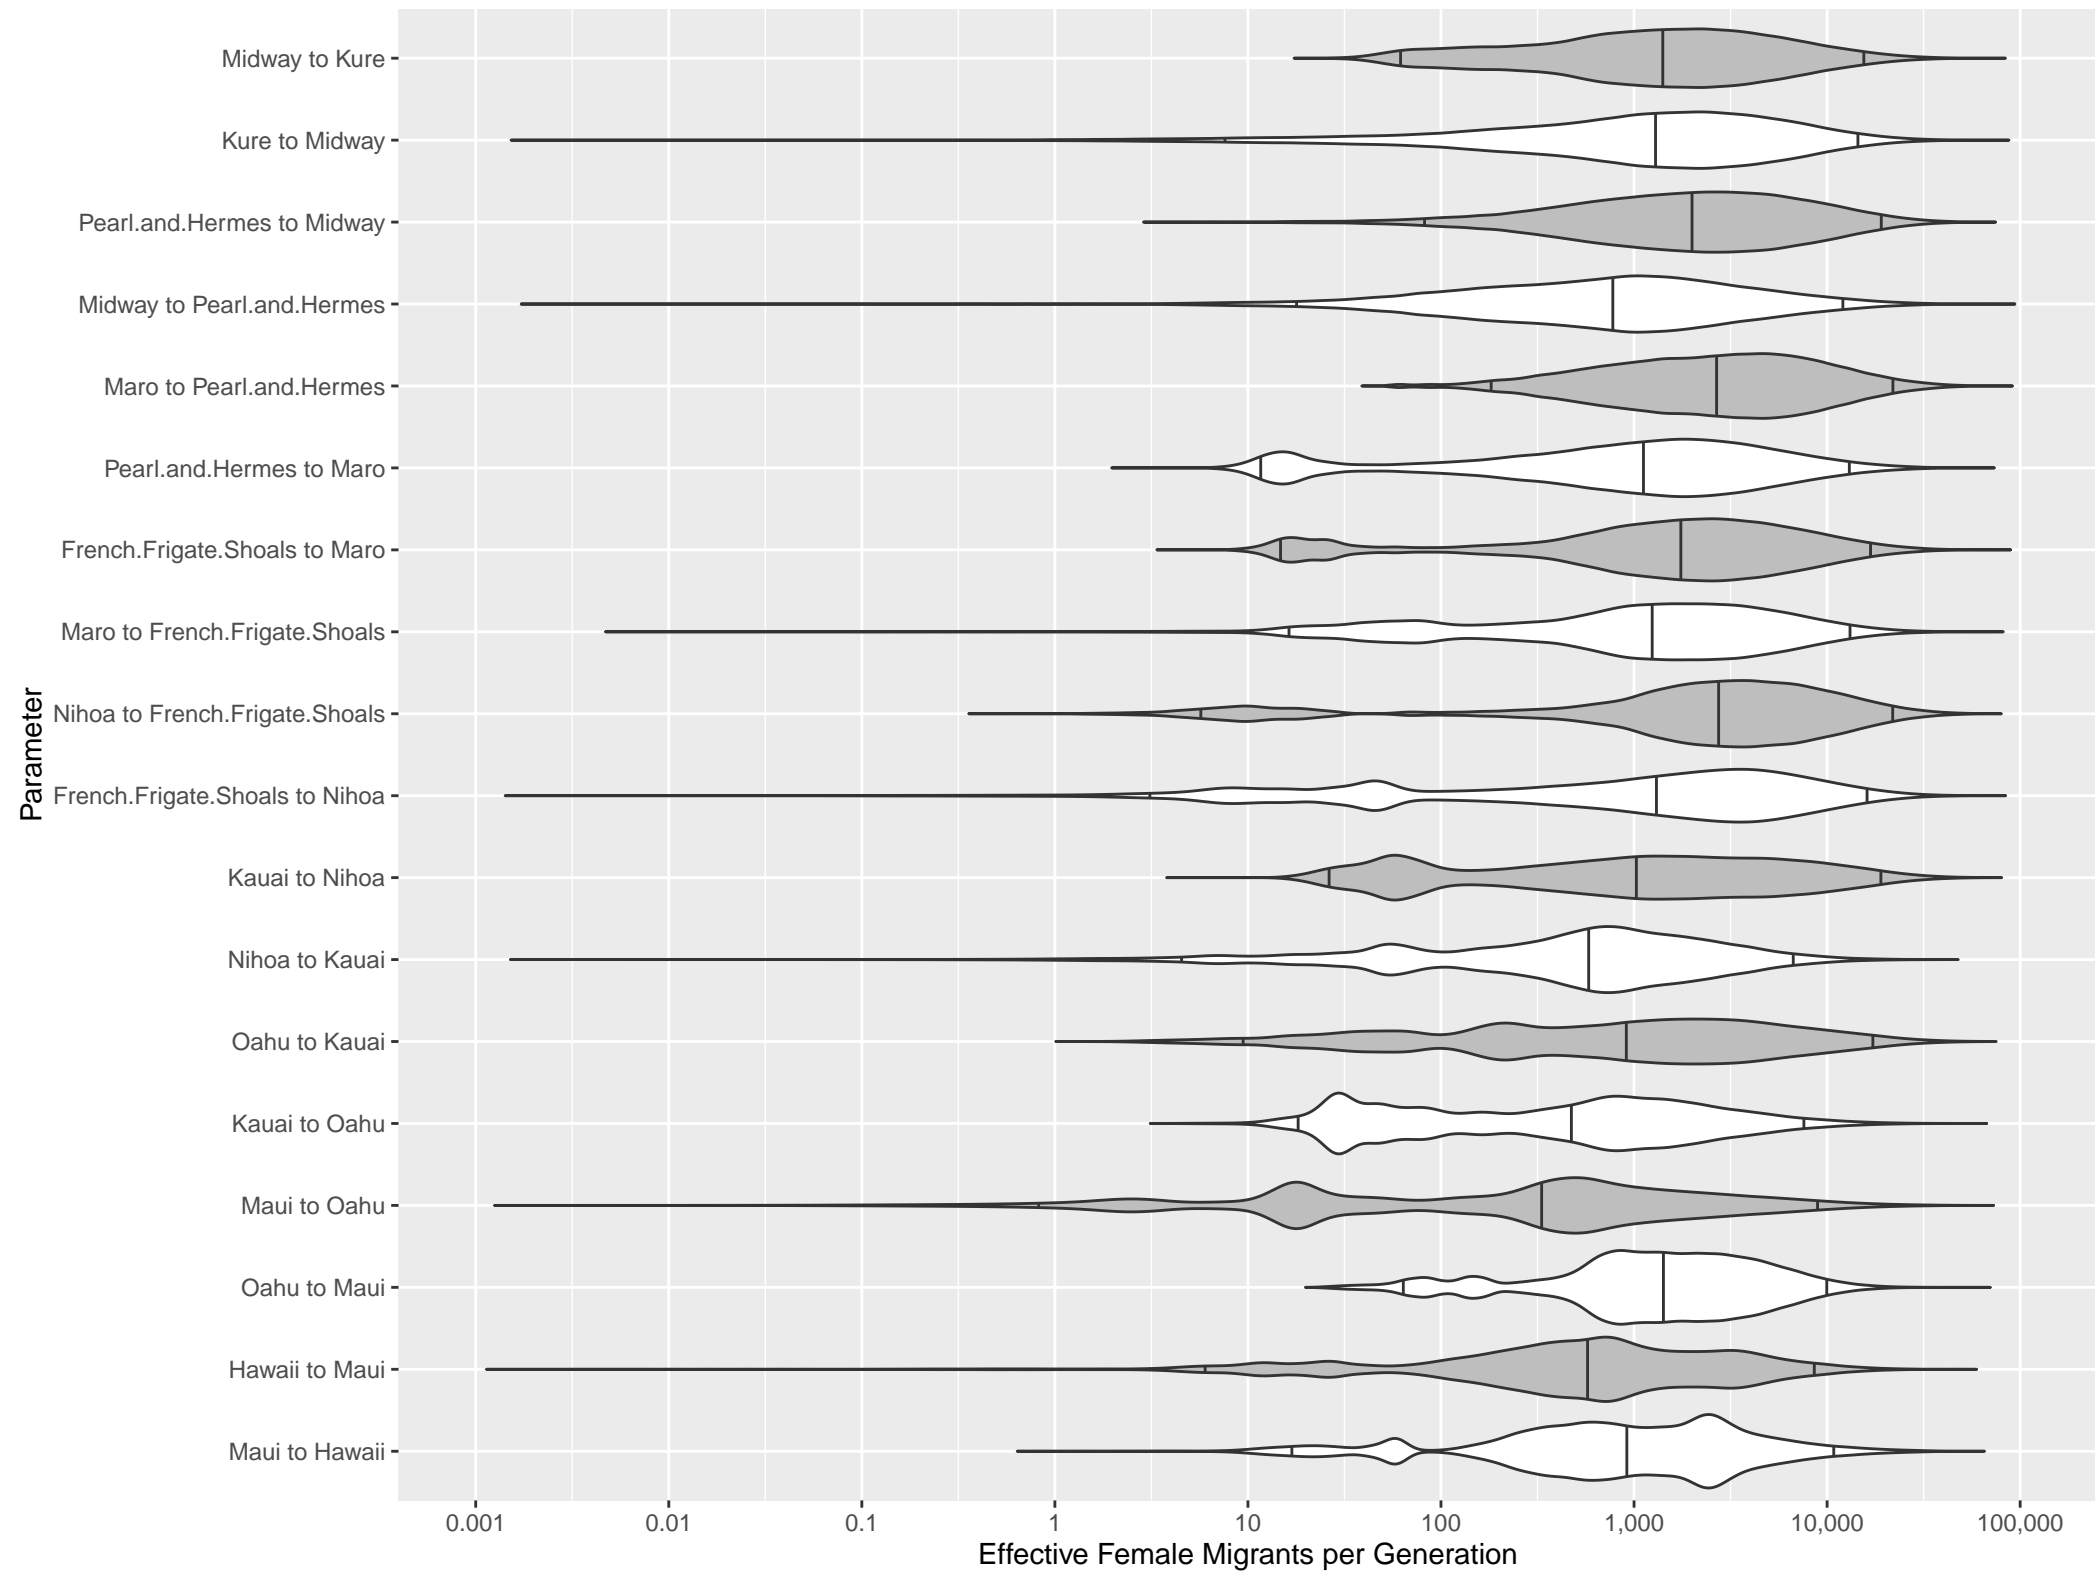

# Zebrasoma flavescens

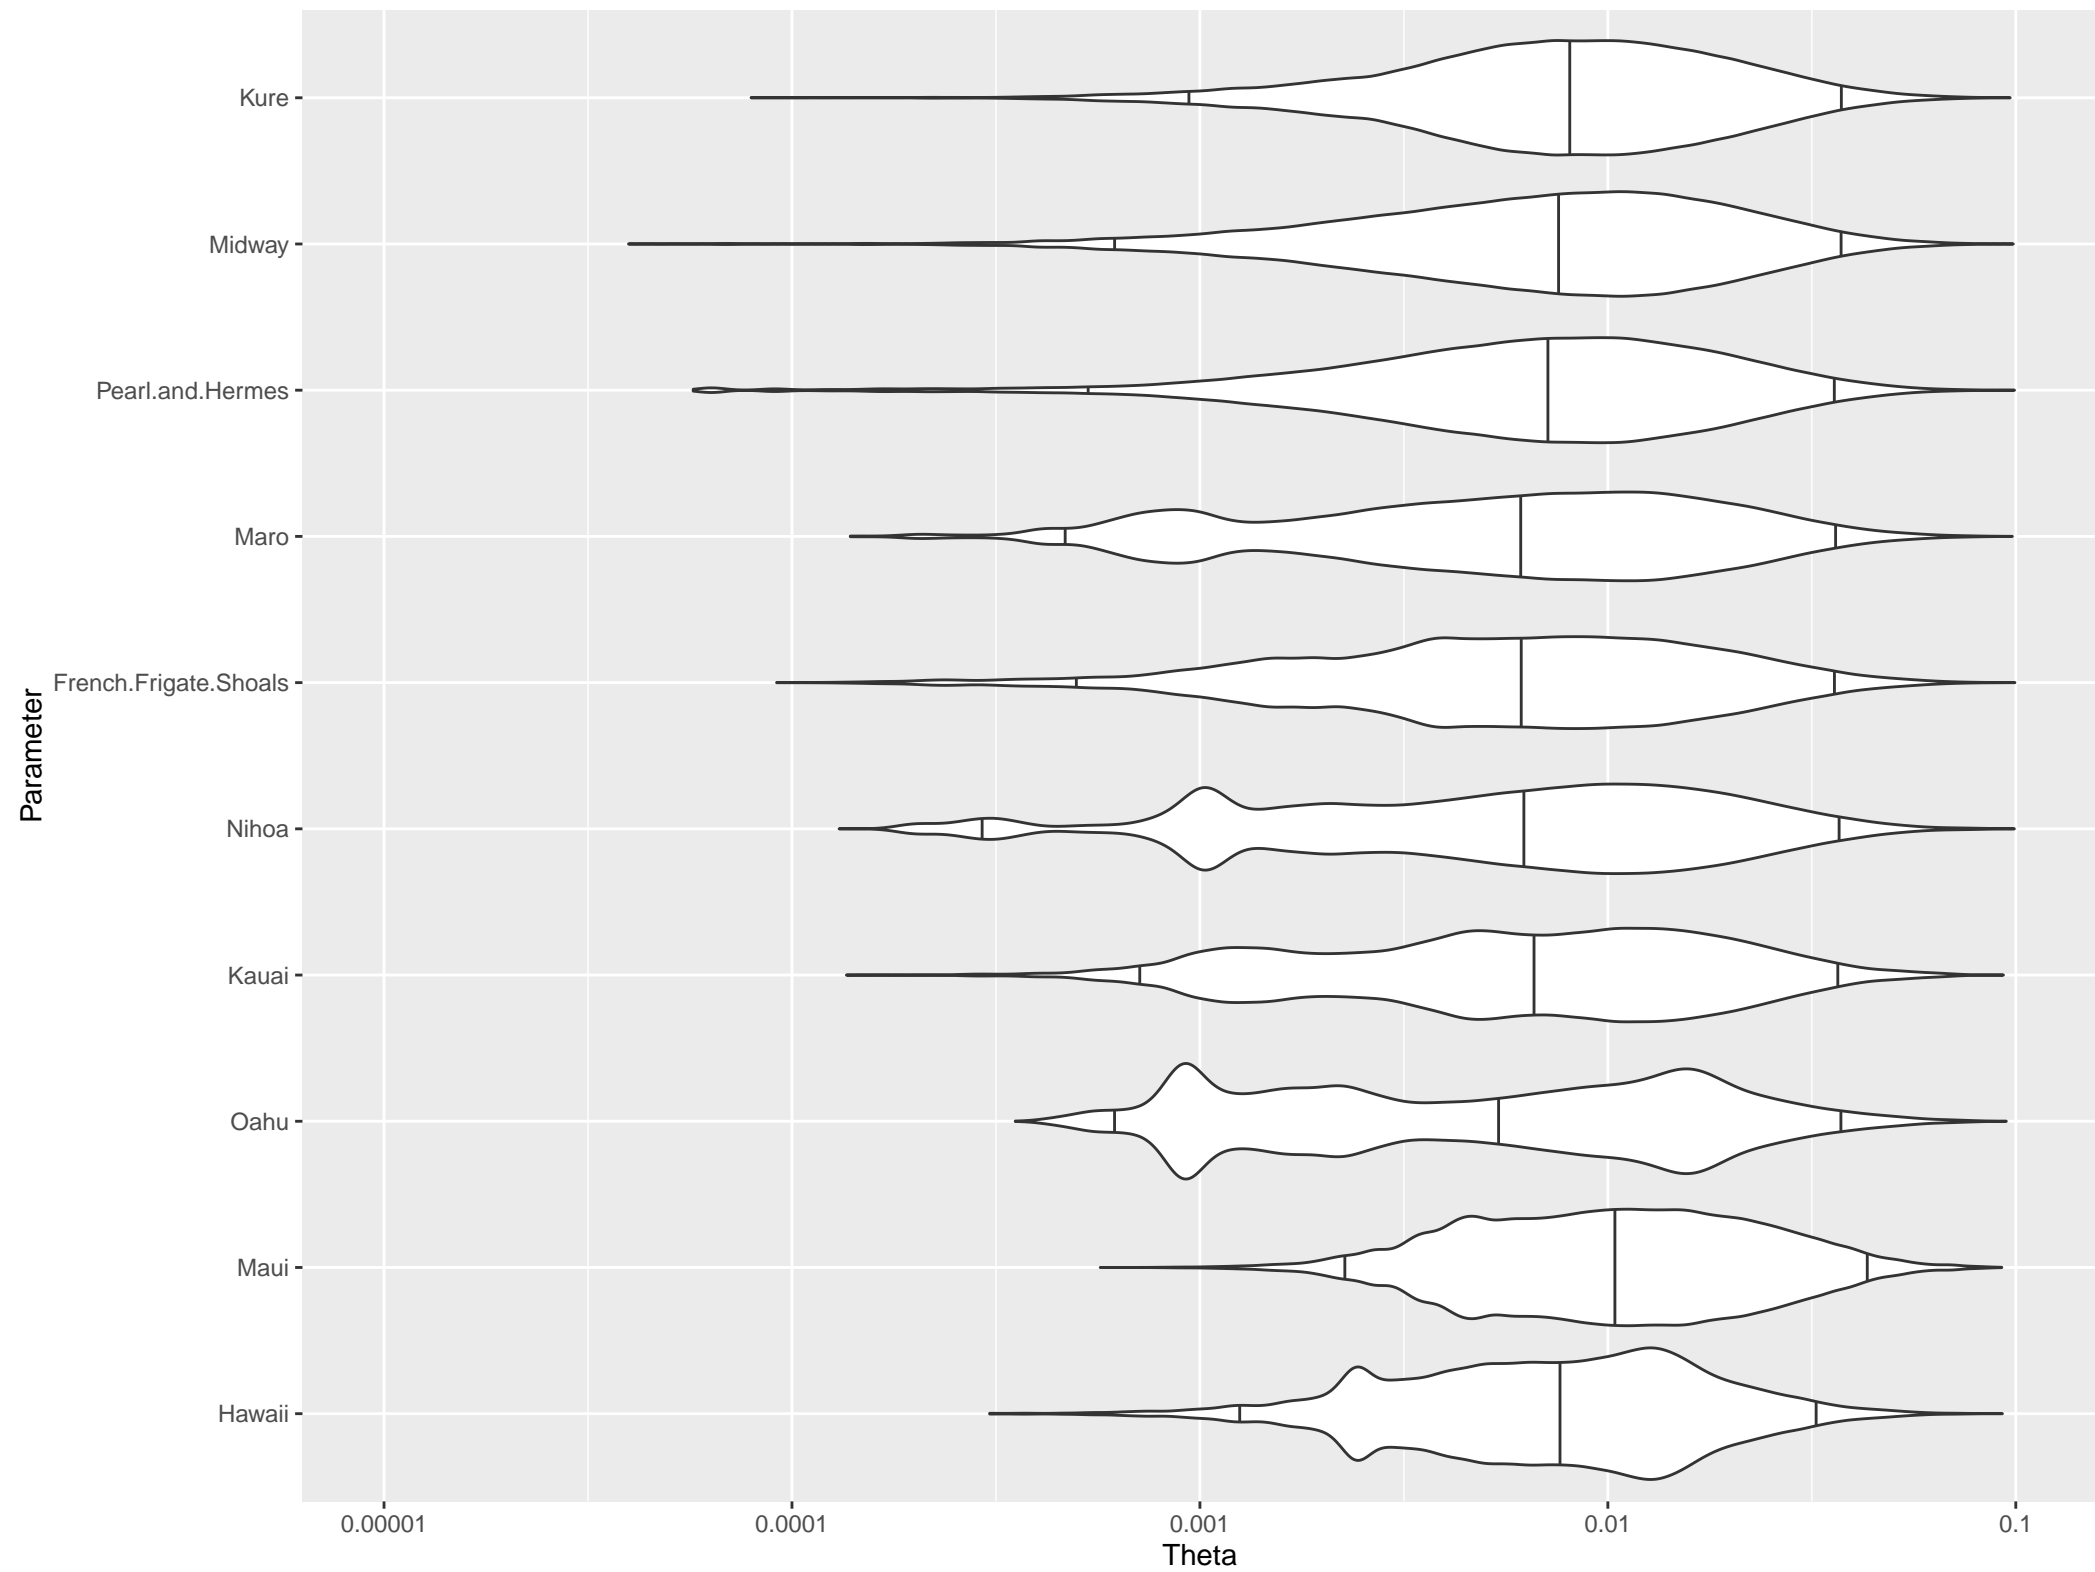

Supplement: EVA-12-255-s003.pdf [file EVA-12-255-s003.pdf]
