# Supplementary material for: A coalescent sampler successfully detects biologically meaningful population structure overlooked by F‐statistics
Source: PubMed Central journal article supplement (PMC6346657; doi:10.1111/eva.12712), 2018-10-15

Slopes for Theta ~ Area for: *Abudefduf vaigiensis*  $p = 0.52$ 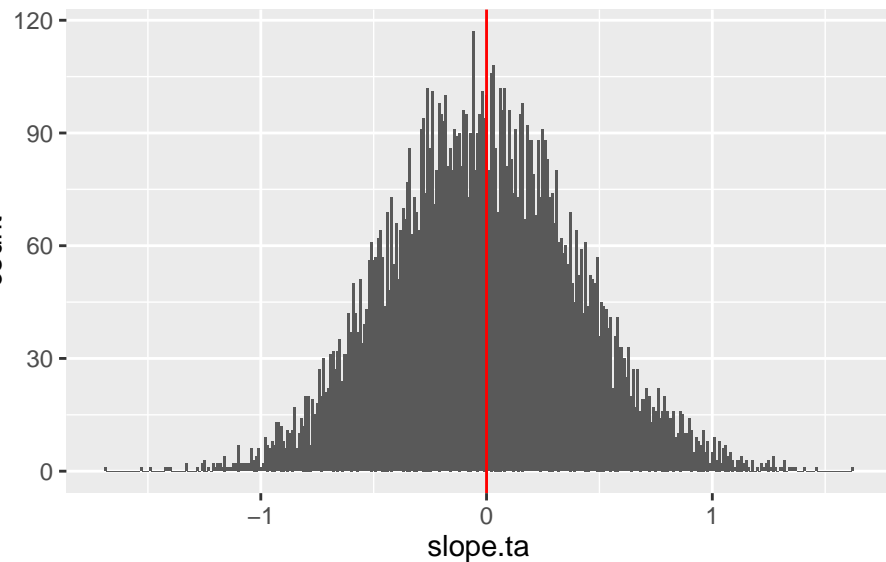Slopes for Theta ~ Area for: *Acanthurus nigroris*  $p = 0.465$ 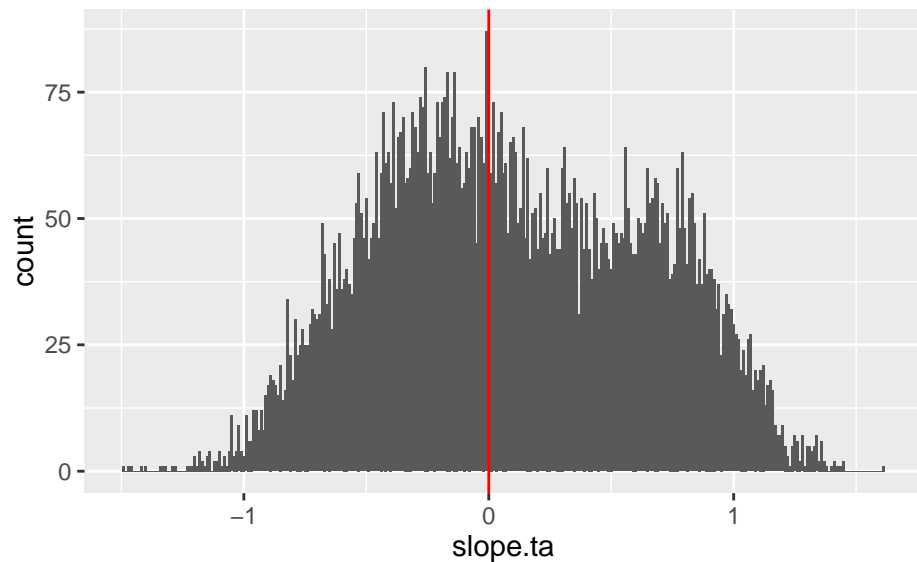Slopes for Theta ~ Area for: *Acanthurus olivaceus*  $p = 0.45$ 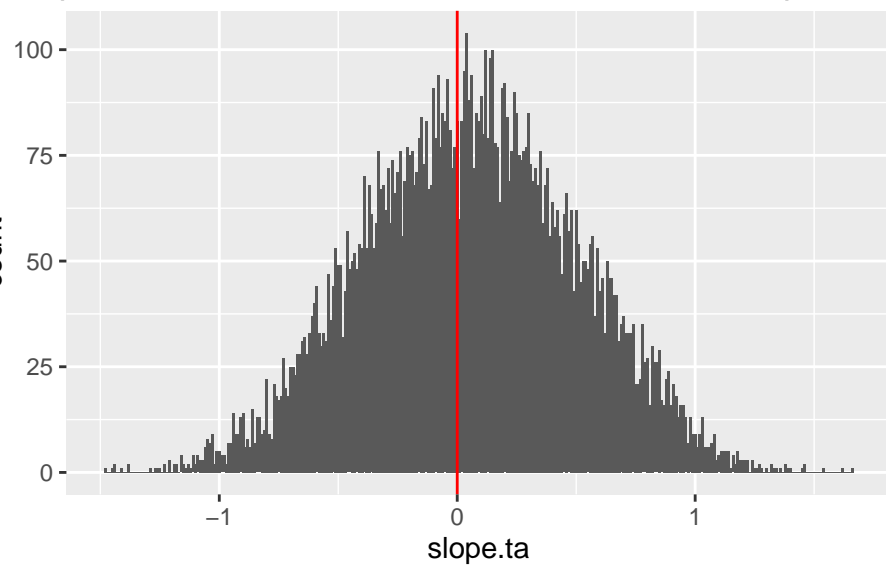Slopes for Theta ~ Area for: *Calcinus hazletti*  $p = 0.2005$ 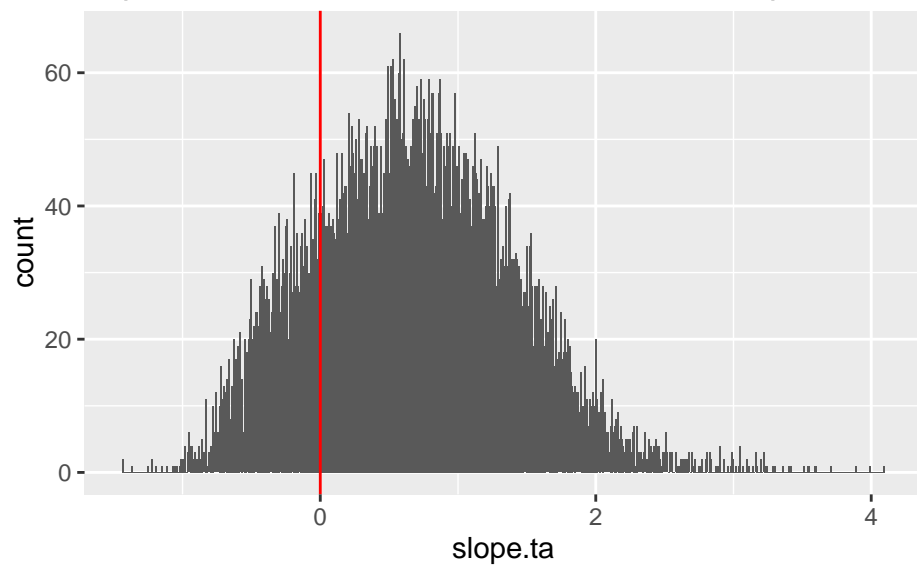

Slopes for Theta ~ Area for: *Halichoeres ornatissimus*  $p = 0.1$ 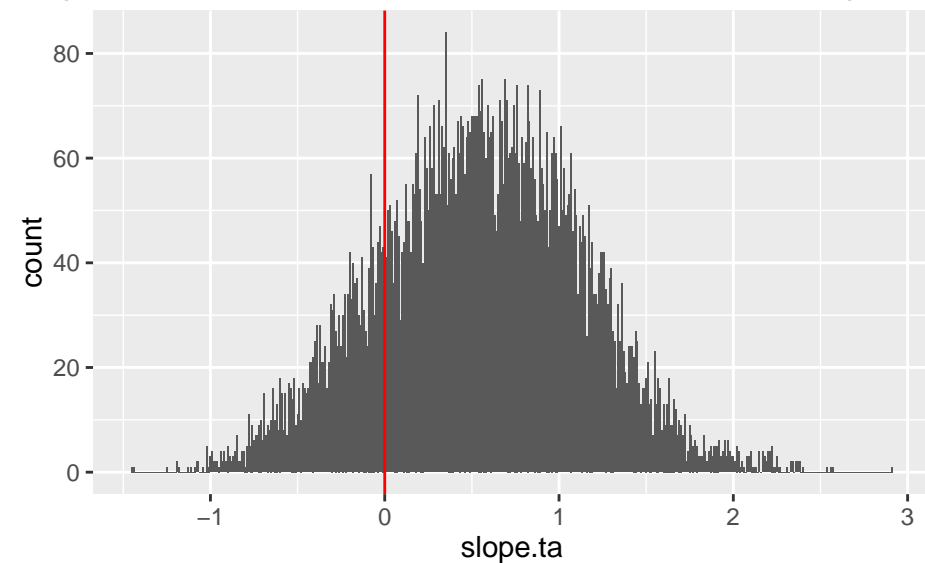Slopes for Theta ~ Area for: *Caranx melampygus*  $p = 0.359$ 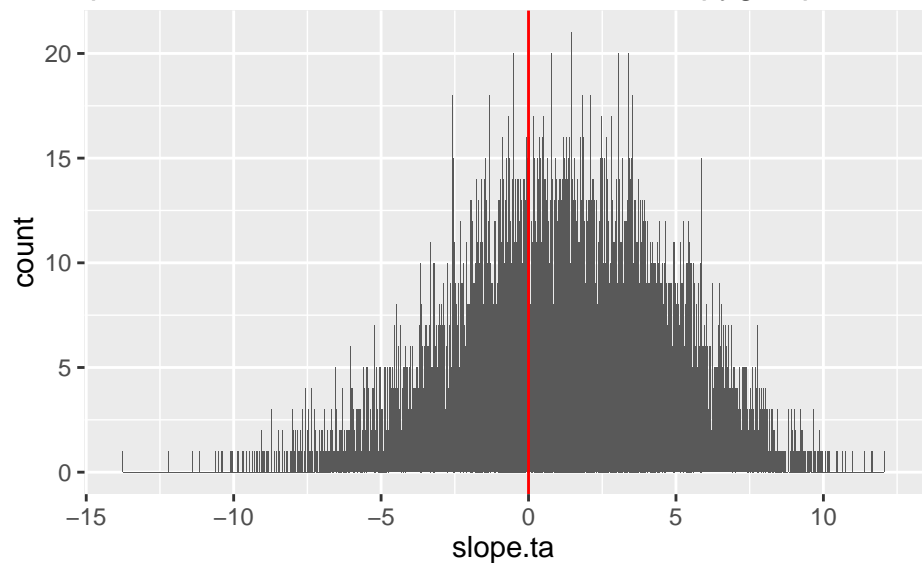Slopes for Theta ~ Area for: *Cellana exarata*  $p = 0$ 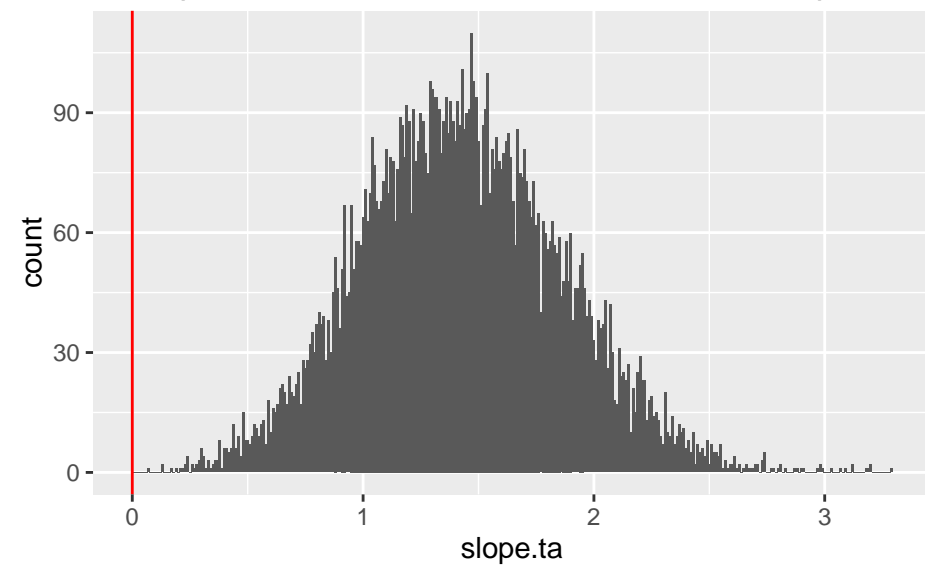Slopes for Theta ~ Area for: *Cellana talcosa*  $p = 0.2465$ 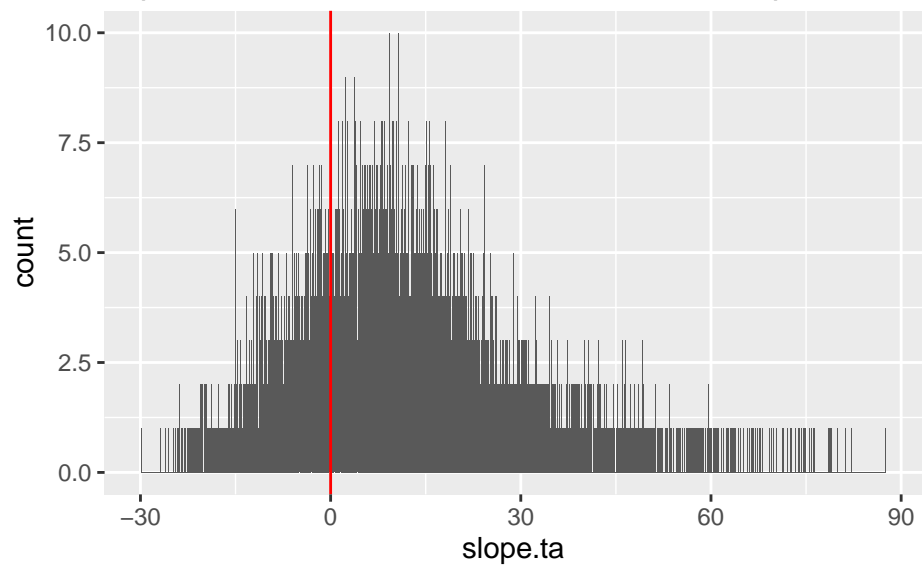

Slopes for Theta ~ Area for: *Chaetodon lunulatus*  $p = 0.227$ 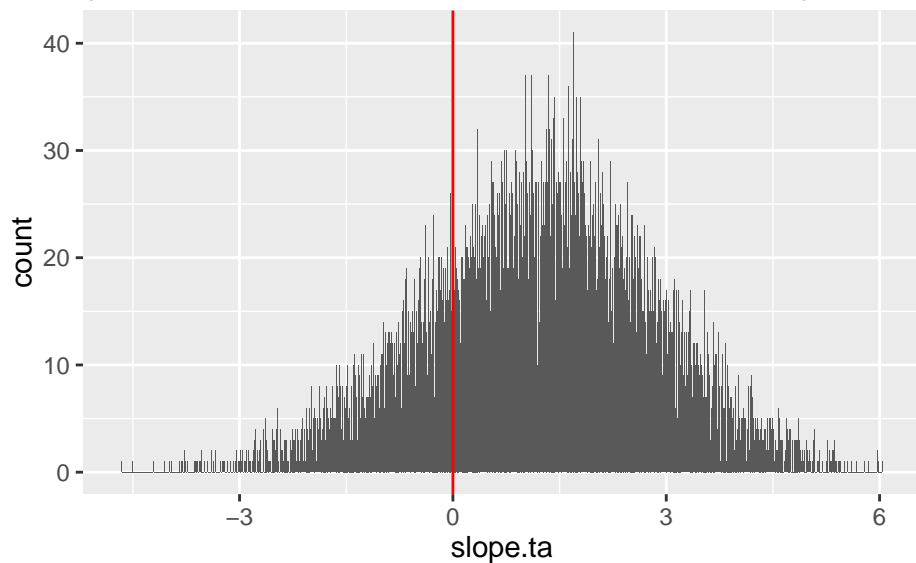Slopes for Theta ~ Area for: *Chaetodon miliaris*  $p = 0.371$ 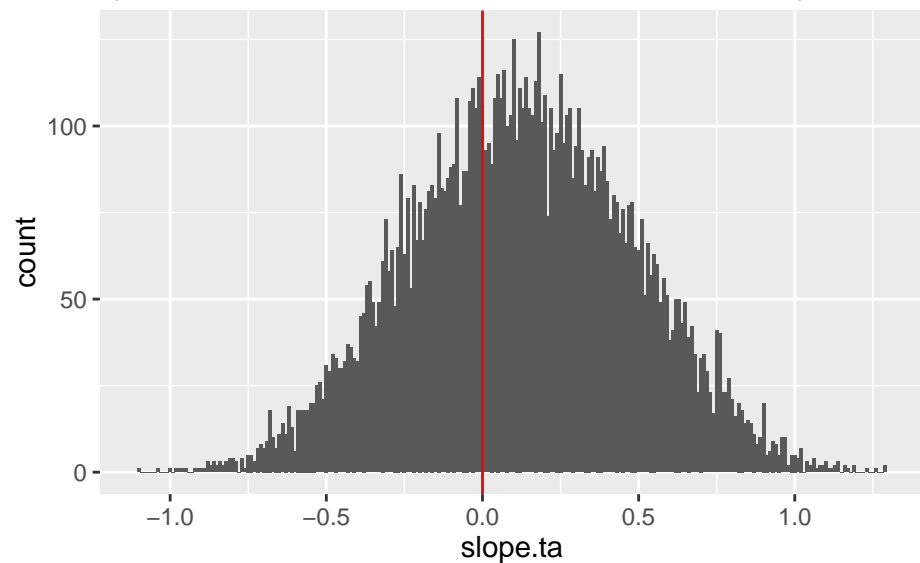Slopes for Theta ~ Area for: *Chaetodon multicinctus*  $p = 0.486$ 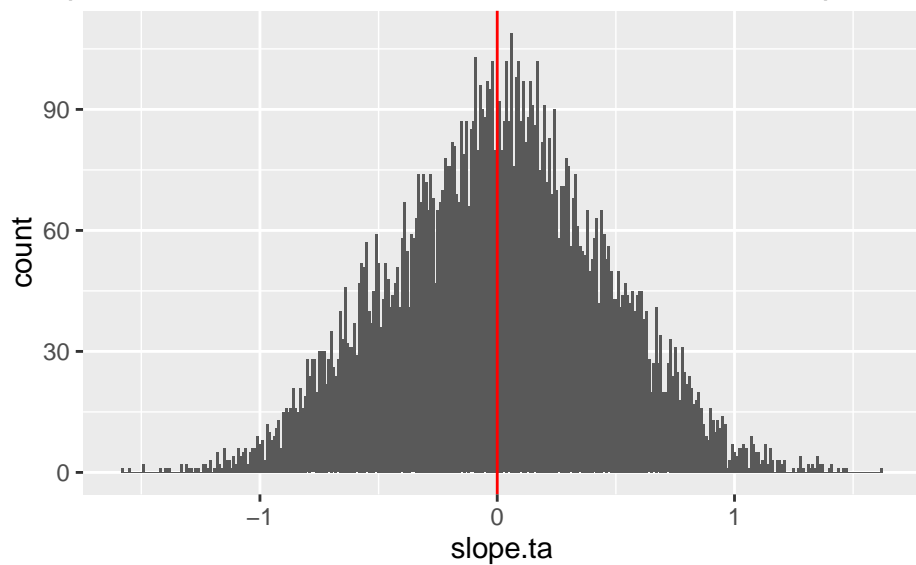Slopes for Theta ~ Area for: *Heterocentrotus mammillatus*  $p = 0.486$ 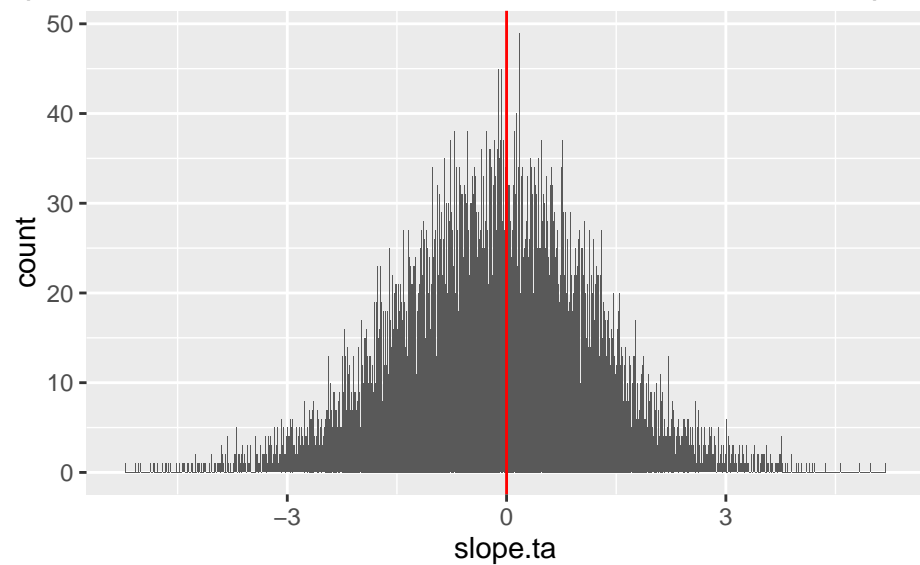

Slopes for Theta ~ Area for: *Holothuria atra*  $p = 0.5953$ 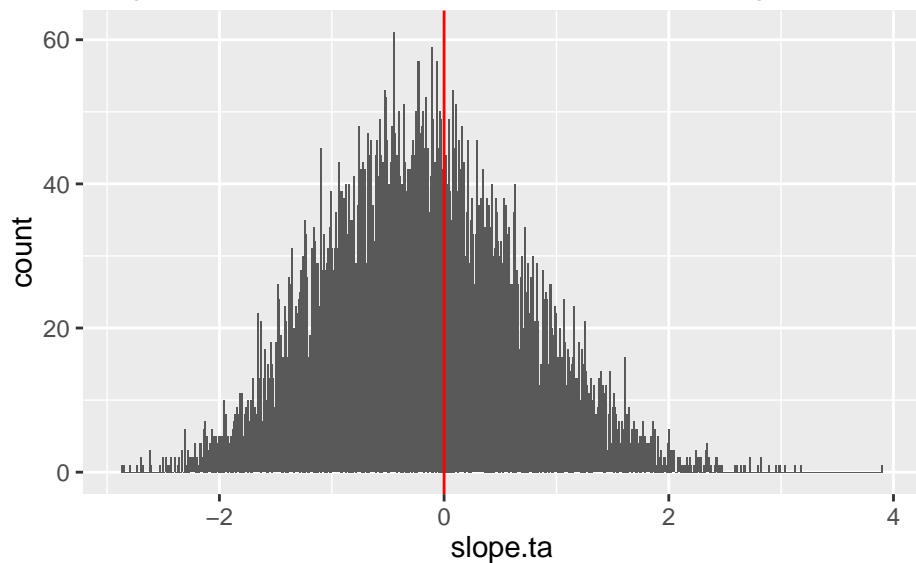Slopes for Theta ~ Area for: *Holothuria whitmaei*  $p = 0.343$ 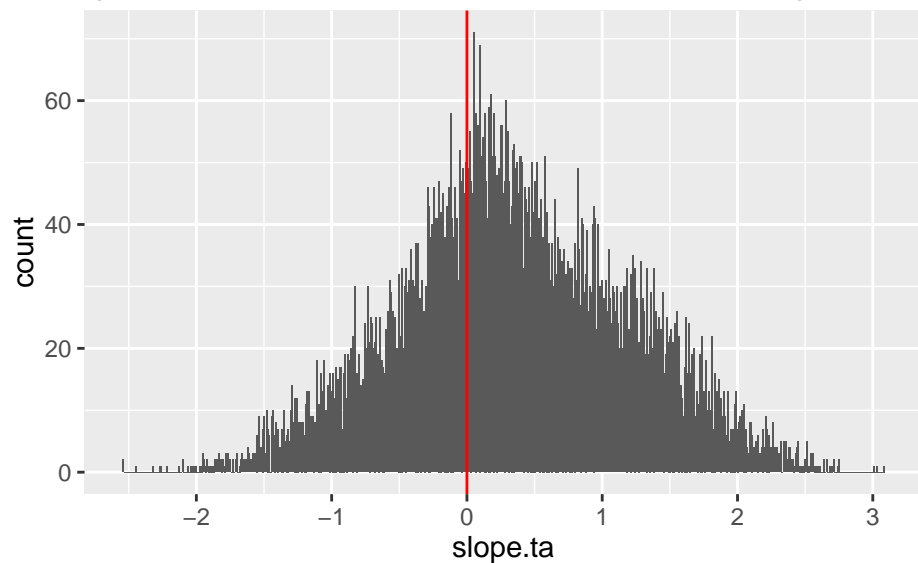Slopes for Theta ~ Area for: *Mulloidichthys vanicolensis*  $p = 0$ 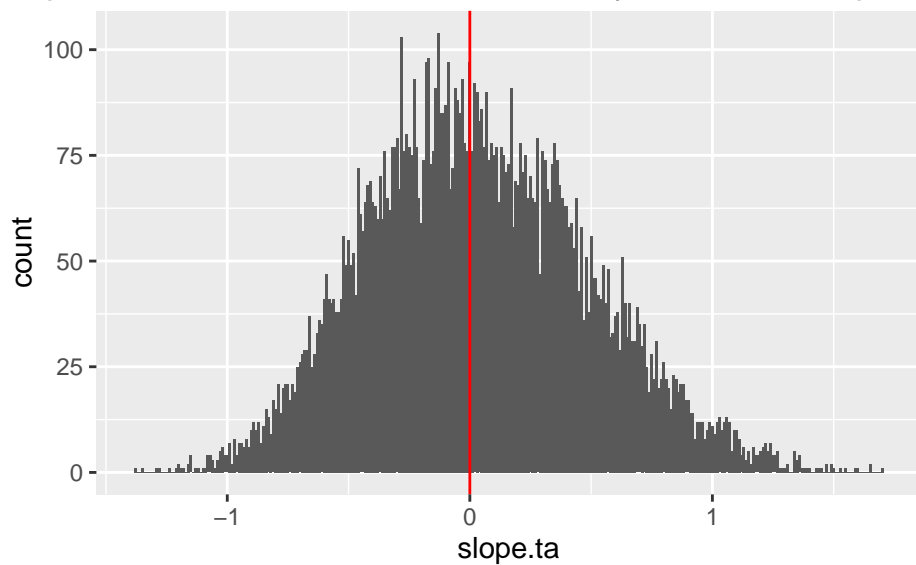Slopes for Theta ~ Area for: *Ophiocoma erinaceus*  $p = 0.34$ 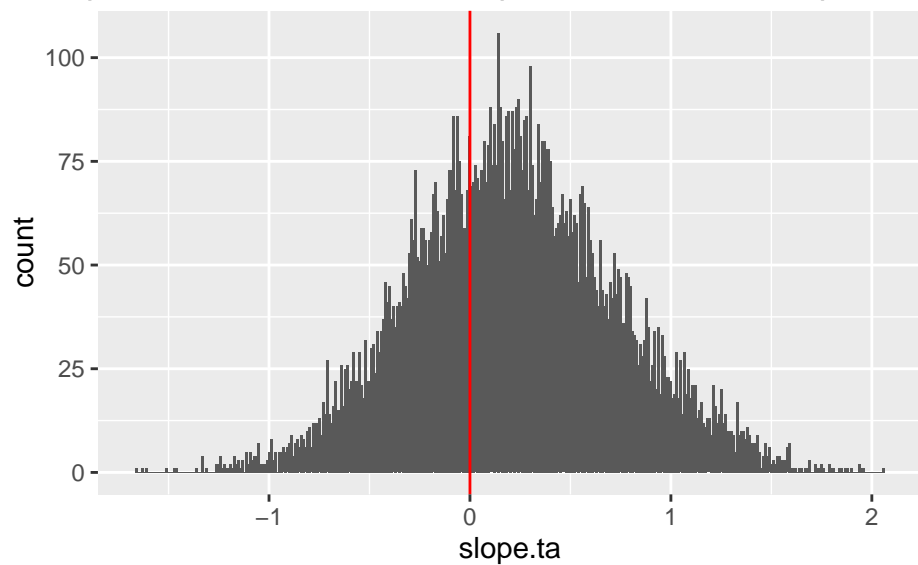

Slopes for Theta ~ Area for: *Ophiocoma pica*  $p = 0.2737$ 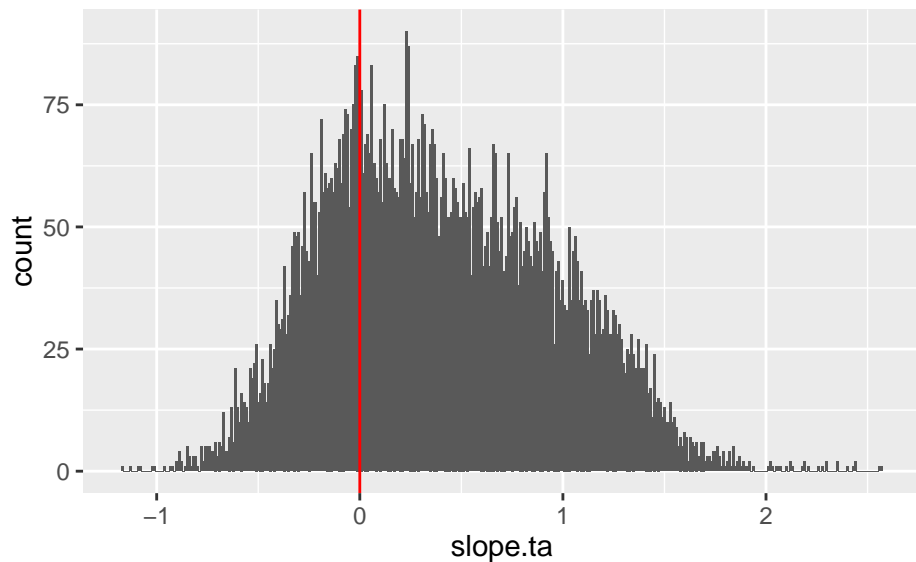Slopes for Theta ~ Area for: *Panulirus penicillatus*  $p = 0.34$ 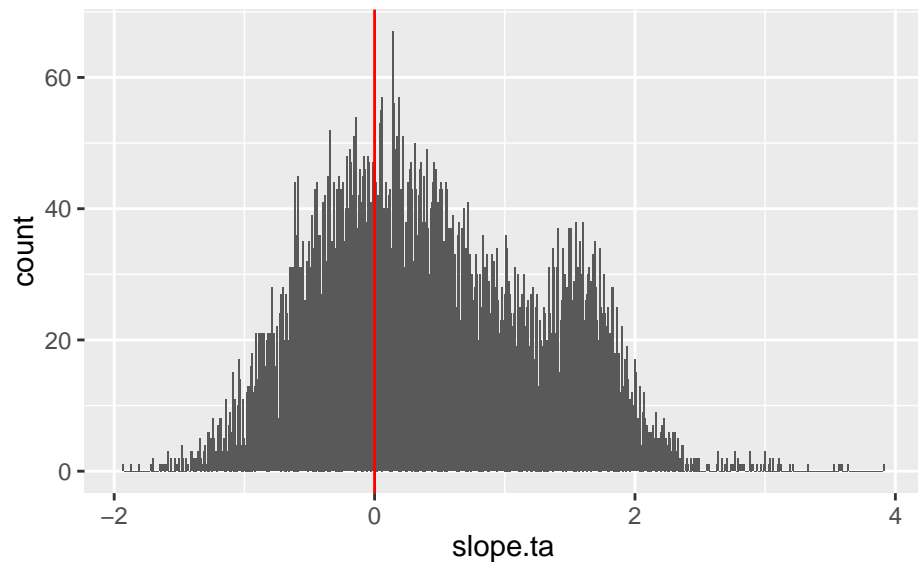Slopes for Theta ~ Area for: *Parupeneus multifasciatus*  $p = 0.$ 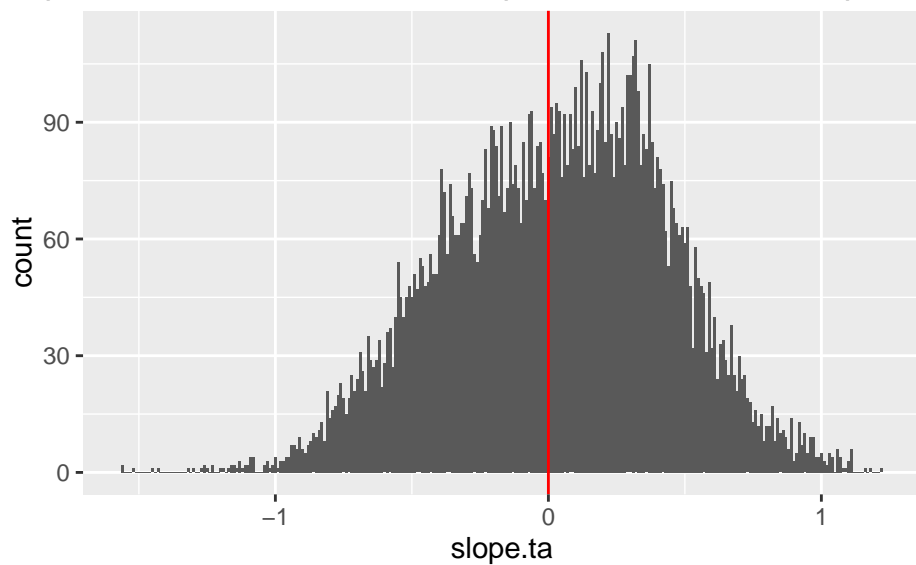Slopes for Theta ~ Area for: *Stegastes fasciolatus*  $p = 0.38$ 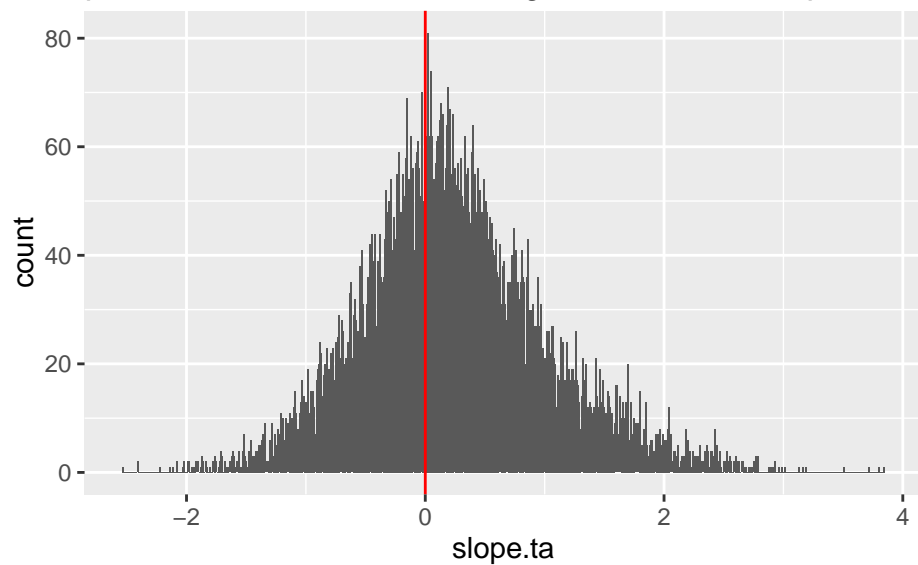

Slopes for Theta ~ Area for: *Triaenodon obesus*  $p = 0.196$

Slopes for Theta ~ Area for: *Zebrasoma flavescens*  $p = 0.53$

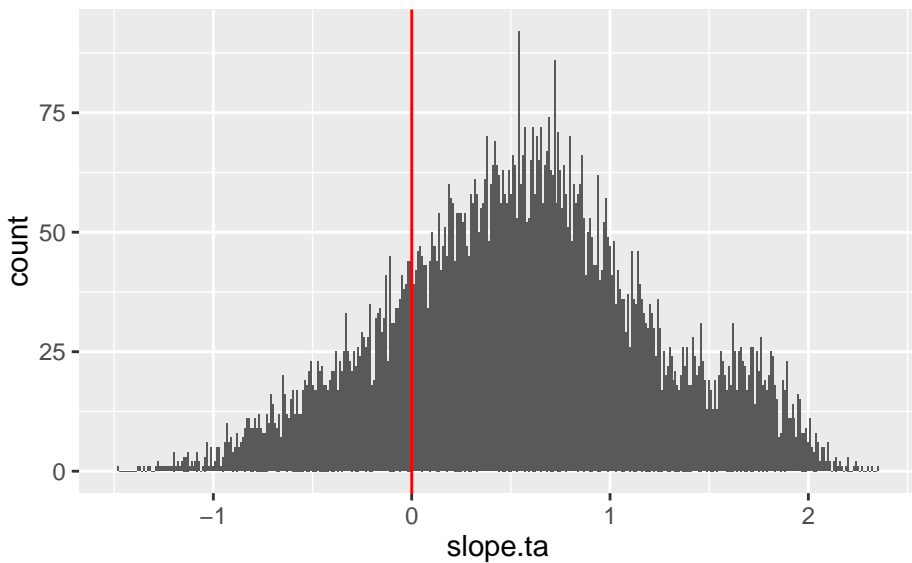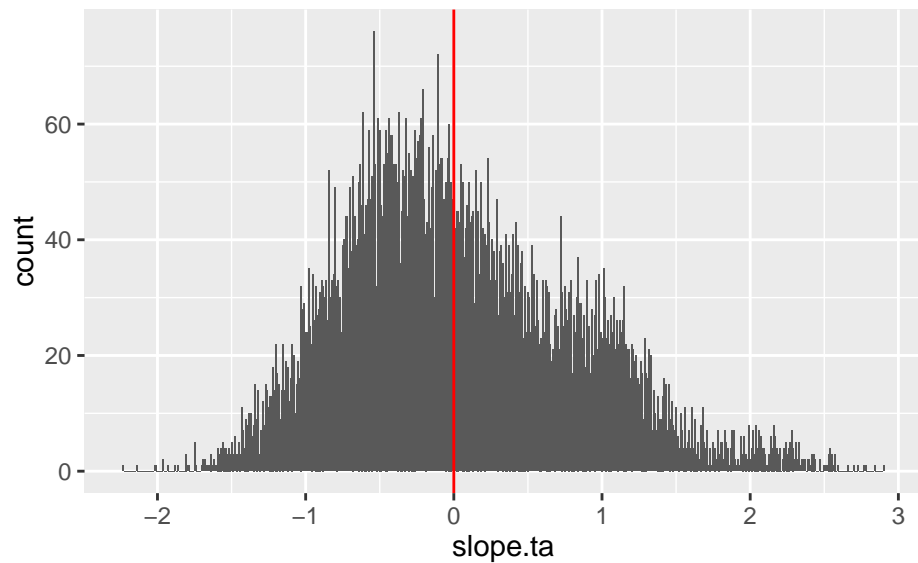

Supplement: EVA-12-255-s004.pdf [file EVA-12-255-s004.pdf]
