# Supplementary material for: A coalescent sampler successfully detects biologically meaningful population structure overlooked by F‐statistics
Source: PubMed Central journal article supplement (PMC6346657; doi:10.1111/eva.12712), 2018-10-15

Effective Female Migrants per Generation

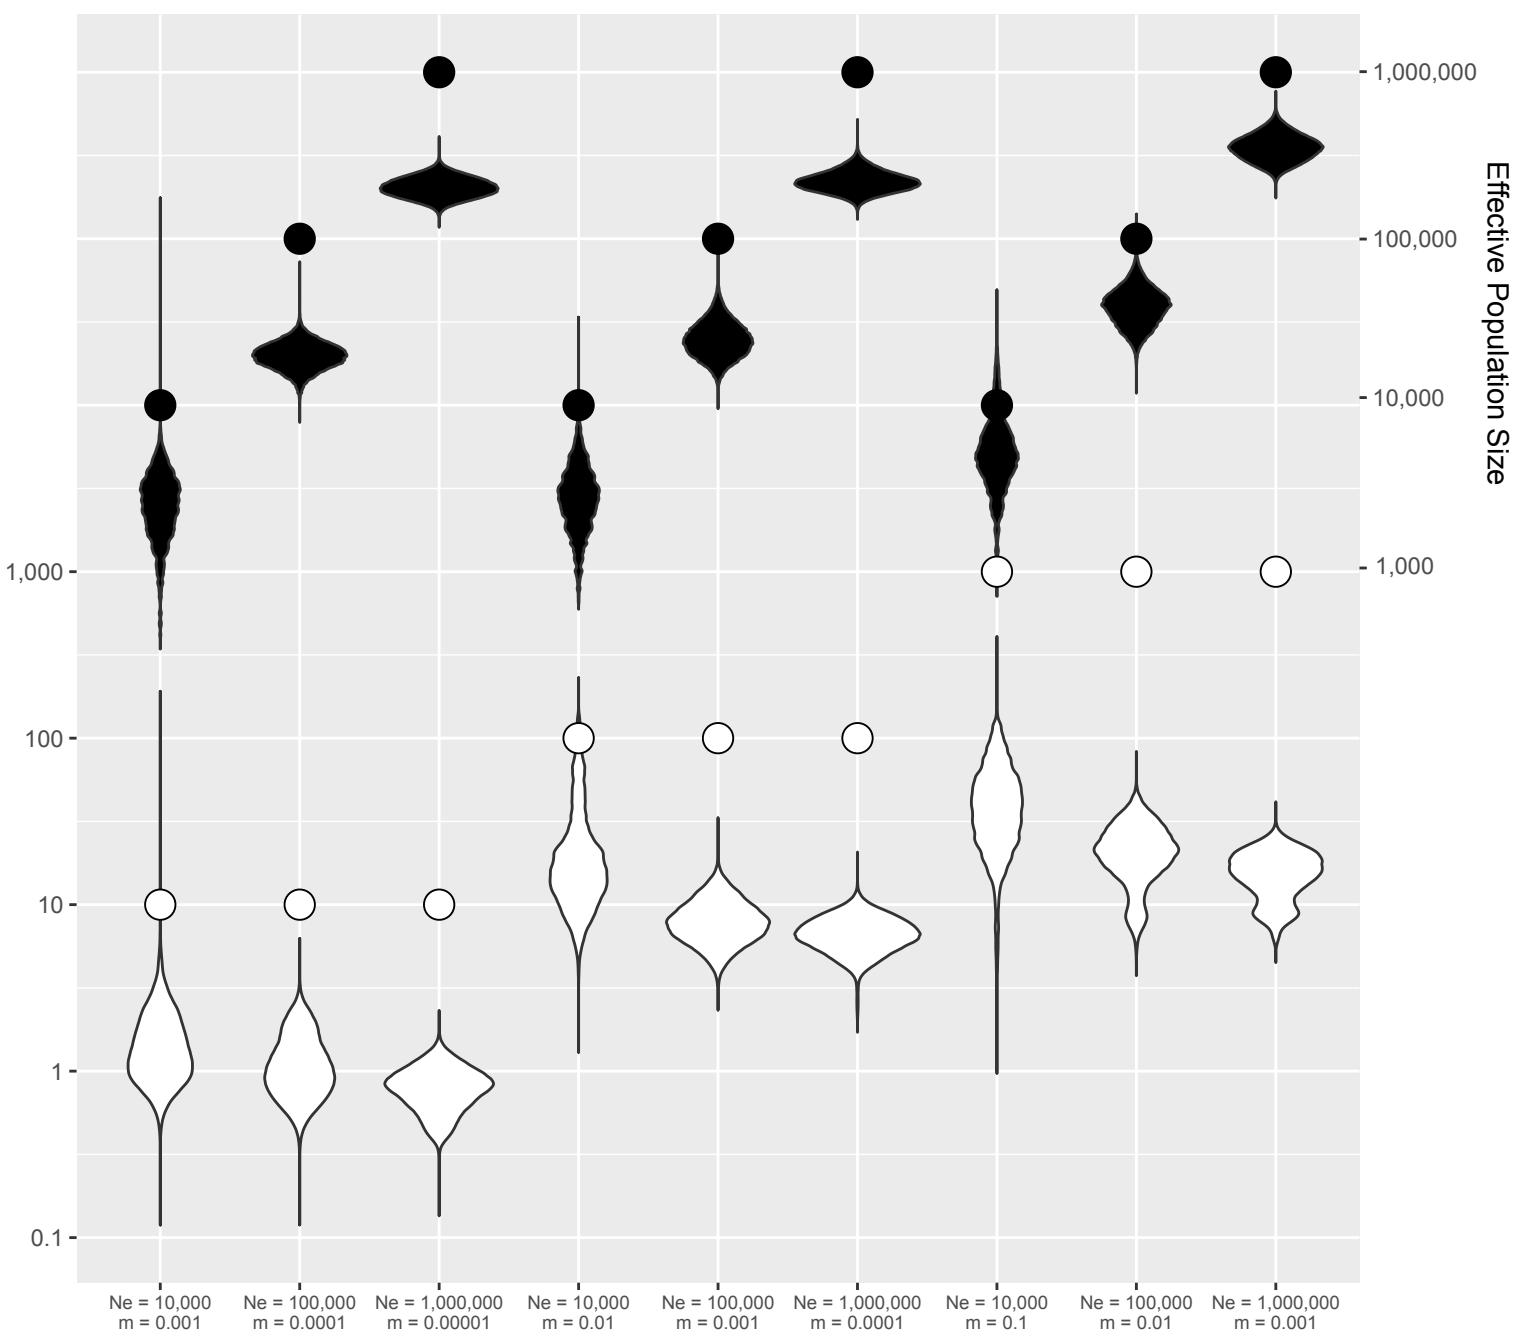

Supplement: EVA-12-255-s002.pdf [file EVA-12-255-s002.pdf]
